# Supplementary material for: Mechanistic and stereoselectivity study for the reaction of trifluoropyruvates with arylpropenes catalyzed by a cationic Lewis acid rhodium complex
Source: Royal Society of Chemistry journal article supplement (doi:10.1039/c5ra21074g), 2015-01-01
Supplement: c5ra21074g1.pdf [file c5ra21074g1.pdf]

**Electronic Supplementary Information for**  
**Mechanistic and Stereoselective Study on the Reaction of**  
**Trifluoropyruvates with Arylpropenes Catalyzed by the Cationic**  
**Lewis Acid Rhodium Complex**

Yang Wang, Xiaokang Guo, Bohua Wu, Donghui Wei\*, and Mingsheng Tang\*

The College of Chemistry and Molecular Engineering, Center of Computational Chemistry,  
Zhengzhou University, Zhengzhou, Henan Province, 450001, P.R. China

**Content**

|                                                                                                                |    |
|----------------------------------------------------------------------------------------------------------------|----|
| Part 1: The relative free energies of the C-C bond formation step .....                                        | S2 |
| Part 2: The energy profile of the <i>endo</i> addition pathway .....                                           | S3 |
| Part 3: List of the energies and Cartesian coordinates of all the structures involved in the reaction<br>..... | S4 |

---

\* Corresponding Authors: [donghuiwei@zzu.edu.cn](mailto:donghuiwei@zzu.edu.cn) (D. H. Wei) and [mstang@zzu.edu.cn](mailto:mstang@zzu.edu.cn) (M. S. Tang)

**Part 1: The relative free energies of the C-C bond formation step****Table S1** Single-point energies for the C-C bond formation step calculated by all electronic basis set def2-DZVP using B3LYP, B3LYP-D3, and M06L (unit: kcal/mol)

|                            | Methods                           |                    |                       |                   |
|----------------------------|-----------------------------------|--------------------|-----------------------|-------------------|
|                            | B3LYP<br>6-<br>311++G(2d,2p)//SDD | B3LYP<br>def2-DZVP | B3LYP-D3<br>def2-DZVP | M06L<br>def2-DZVP |
| <b>TS2S<sub>exo</sub></b>  | 0                                 | 0                  | 0                     | 0                 |
| <b>TS2R<sub>exo</sub></b>  | 0.97                              | 0.77               | 0.73                  | 0.27              |
| <b>TS2R<sub>endo</sub></b> | 4.09                              | 0.24               | 0.94                  | 1.42              |
| <b>TS2S<sub>endo</sub></b> | 6.85                              | 4.21               | 4.28                  | 2.73              |

## Part 2: The energy profile of the *endo* addition pathway

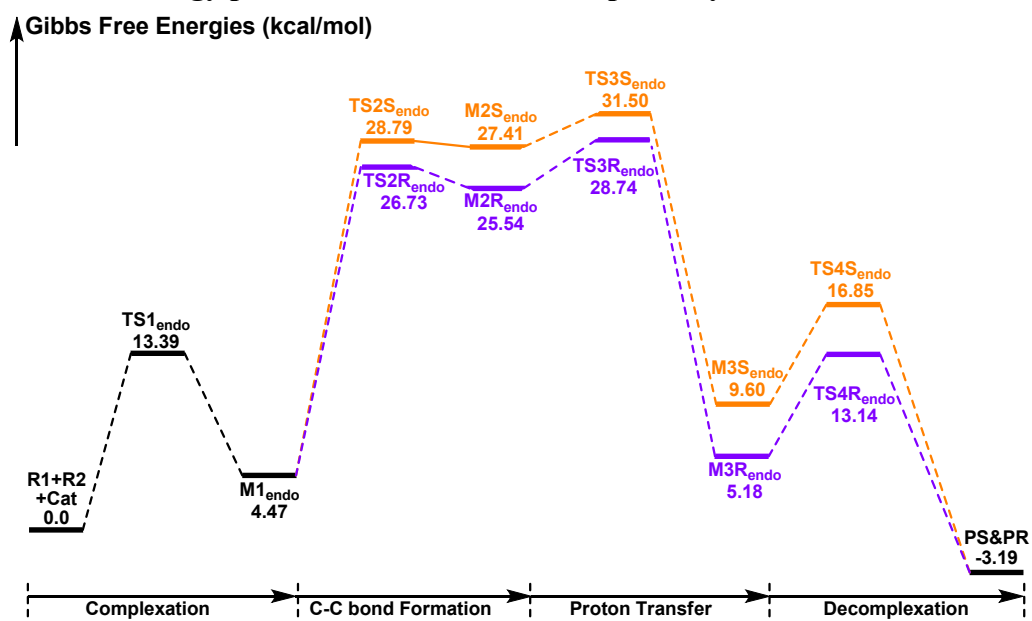

Figure S1 The Gibbs free energy profile of the endo addition pathways

### Part 3: List of the energies and Cartesian coordinates of all the structures involved in the reaction

Cat

Total energy= -1649.65220471

Sum of electronic and zero-point Energies= -1648.964090

Sum of electronic and thermal Energies= -1648.927325

Sum of electronic and thermal Enthalpies= -1648.926381

Sum of electronic and thermal Free Energies= -1649.034082

---

| Center<br>Number | Atomic<br>Number | Atomic<br>Type | Coordinates (Angstroms) |           |           |
|------------------|------------------|----------------|-------------------------|-----------|-----------|
|                  |                  |                | X                       | Y         | Z         |
| 1                | 45               | 0              | -0.000179               | -1.617459 | -0.006947 |
| 2                | 6                | 0              | -3.163625               | -2.167678 | -0.113961 |
| 3                | 1                | 0              | -3.113597               | -2.759036 | -1.035487 |
| 4                | 7                | 0              | -3.623777               | 0.163568  | -0.220500 |
| 5                | 6                | 0              | -2.317303               | 0.003226  | -0.128518 |
| 6                | 6                | 0              | -4.346848               | 1.403133  | -0.334914 |
| 7                | 7                | 0              | -1.947822               | -1.323981 | -0.070958 |
| 8                | 6                | 0              | -4.320247               | -1.141458 | -0.217748 |
| 9                | 1                | 0              | -5.015835               | -1.161242 | 0.624856  |
| 10               | 7                | 0              | 1.946983                | -1.322557 | 0.067405  |
| 11               | 6                | 0              | 4.318478                | -1.139533 | 0.227591  |
| 12               | 1                | 0              | 5.017161                | -1.158539 | -0.612610 |
| 13               | 7                | 0              | 3.621699                | 0.165212  | 0.228386  |
| 14               | 6                | 0              | 3.162466                | -2.166003 | 0.117141  |
| 15               | 1                | 0              | 3.107803                | -2.757598 | 1.038241  |
| 16               | 6                | 0              | 4.520151                | 1.990391  | 1.596695  |
| 17               | 1                | 0              | 4.094233                | 1.522377  | 2.479221  |
| 18               | 6                | 0              | 1.223823                | 0.972396  | 0.073475  |
| 19               | 6                | 0              | -0.002237               | 3.058602  | 0.011064  |
| 20               | 1                | 0              | -0.002533               | 4.143432  | 0.016291  |
| 21               | 6                | 0              | 4.344177                | 1.405476  | 0.338759  |
| 22               | 6                | 0              | -4.904052               | 1.980718  | 0.806394  |
| 23               | 1                | 0              | -4.769214               | 1.512491  | 1.776883  |
| 24               | 6                | 0              | 4.894109                | 1.983403  | -0.805898 |
| 25               | 1                | 0              | 4.753995                | 1.515118  | -1.775434 |
| 26               | 6                | 0              | -4.515546               | 1.988037  | -1.593825 |
| 27               | 1                | 0              | -4.084639               | 1.520400  | -2.473952 |
| 28               | 6                | 0              | -0.000885               | 0.297228  | -0.002527 |
| 29               | 6                | 0              | 1.220013                | 2.379269  | 0.077578  |
| 30               | 1                | 0              | 2.142742                | 2.945394  | 0.129177  |
| 31               | 6                | 0              | -1.223889               | 2.378874  | -0.061449 |
| 32               | 1                | 0              | -2.147181               | 2.944530  | -0.106602 |

|    |   |   |           |           |           |
|----|---|---|-----------|-----------|-----------|
| 33 | 6 | 0 | -1.226159 | 0.971757  | -0.071626 |
| 34 | 6 | 0 | 5.617970  | 3.170446  | -0.685136 |
| 35 | 1 | 0 | 6.043025  | 3.624444  | -1.576048 |
| 36 | 6 | 0 | 2.315680  | 0.004525  | 0.130128  |
| 37 | 6 | 0 | -5.241406 | 3.172379  | -1.697917 |
| 38 | 1 | 0 | -5.372777 | 3.630461  | -2.674890 |
| 39 | 6 | 0 | -5.627841 | 3.167311  | 0.681508  |
| 40 | 1 | 0 | -6.058378 | 3.621054  | 1.569876  |
| 41 | 6 | 0 | 5.806382  | 3.784383  | 0.561064  |
| 42 | 6 | 0 | -5.809271 | 3.781292  | -0.565895 |
| 43 | 6 | 0 | 5.245799  | 3.175159  | 1.696362  |
| 44 | 1 | 0 | 5.382713  | 3.633530  | 2.672529  |
| 45 | 6 | 0 | 6.593306  | 5.065162  | 0.690795  |
| 46 | 1 | 0 | 6.947233  | 5.418337  | -0.282527 |
| 47 | 1 | 0 | 7.467180  | 4.926303  | 1.339302  |
| 48 | 1 | 0 | 5.984606  | 5.859495  | 1.140214  |
| 49 | 6 | 0 | -6.597994 | 5.060403  | -0.700442 |
| 50 | 1 | 0 | -6.938980 | 5.424948  | 0.273107  |
| 51 | 1 | 0 | -7.480891 | 4.913185  | -1.334788 |
| 52 | 1 | 0 | -5.996208 | 5.849165  | -1.168099 |
| 53 | 1 | 0 | 4.887658  | -1.236866 | 1.155559  |
| 54 | 1 | 0 | -4.892874 | -1.237732 | -1.143812 |
| 55 | 6 | 0 | -3.262641 | -3.184869 | 1.071347  |
| 56 | 6 | 0 | 3.269151  | -3.181598 | -1.068554 |
| 57 | 6 | 0 | 4.575778  | -3.978740 | -0.884509 |
| 58 | 1 | 0 | 4.646494  | -4.755814 | -1.653884 |
| 59 | 1 | 0 | 5.464760  | -3.344861 | -0.976868 |
| 60 | 1 | 0 | 4.608622  | -4.472739 | 0.094228  |
| 61 | 6 | 0 | 2.085109  | -4.163029 | -0.999795 |
| 62 | 1 | 0 | 2.047560  | -4.681642 | -0.033936 |
| 63 | 1 | 0 | 1.121699  | -3.656221 | -1.158816 |
| 64 | 1 | 0 | 2.178736  | -4.921779 | -1.785283 |
| 65 | 6 | 0 | 3.271663  | -2.472380 | -2.433740 |
| 66 | 1 | 0 | 2.341957  | -1.915934 | -2.601591 |
| 67 | 1 | 0 | 4.112160  | -1.776610 | -2.538586 |
| 68 | 1 | 0 | 3.362736  | -3.214589 | -3.235045 |
| 69 | 6 | 0 | -2.078377 | -4.165199 | 0.993570  |
| 70 | 1 | 0 | -2.047347 | -4.682667 | 0.026667  |
| 71 | 1 | 0 | -1.114196 | -3.658545 | 1.146429  |
| 72 | 1 | 0 | -2.166471 | -4.925000 | 1.778726  |
| 73 | 6 | 0 | -4.569513 | -3.983114 | 0.894185  |
| 74 | 1 | 0 | -5.458563 | -3.350135 | 0.992203  |
| 75 | 1 | 0 | -4.607575 | -4.476536 | -0.084756 |
| 76 | 1 | 0 | -4.634692 | -4.760787 | 1.663417  |

|    |   |   |           |           |          |
|----|---|---|-----------|-----------|----------|
| 77 | 6 | 0 | -3.258115 | -2.477545 | 2.437397 |
| 78 | 1 | 0 | -4.099412 | -1.783424 | 2.547844 |
| 79 | 1 | 0 | -3.343485 | -3.220933 | 3.238142 |
| 80 | 1 | 0 | -2.328405 | -1.920001 | 2.600782 |

---

## R1

Total energy= -679.40825743

Sum of electronic and zero-point Energies= -679.331634

Sum of electronic and thermal Energies= -679.321763

Sum of electronic and thermal Enthalpies= -679.320819

Sum of electronic and thermal Free Energies= -679.369497

---

| Center<br>Number | Atomic<br>Number | Atomic<br>Type | Coordinates (Angstroms) |           |           |
|------------------|------------------|----------------|-------------------------|-----------|-----------|
|                  |                  |                | X                       | Y         | Z         |
| 1                | 8                | 0              | 0.785308                | 1.987948  | -0.053918 |
| 2                | 6                | 0              | 0.361691                | 0.862573  | -0.021303 |
| 3                | 6                | 0              | -1.158948               | 0.597240  | 0.003799  |
| 4                | 6                | 0              | 1.336190                | -0.343323 | 0.006481  |
| 5                | 9                | 0              | 1.131578                | -1.084589 | 1.110549  |
| 6                | 9                | 0              | 2.602866                | 0.085989  | 0.014490  |
| 7                | 9                | 0              | 1.157861                | -1.122224 | -1.074098 |
| 8                | 8                | 0              | -1.956382               | 1.503530  | 0.052511  |
| 9                | 8                | 0              | -1.428190               | -0.703272 | -0.034076 |
| 10               | 6                | 0              | -2.831495               | -1.068260 | -0.013526 |
| 11               | 1                | 0              | -2.845340               | -2.157200 | -0.032112 |
| 12               | 1                | 0              | -3.301141               | -0.690736 | 0.897585  |
| 13               | 1                | 0              | -3.334773               | -0.659673 | -0.892789 |

---

## R2

Total energy= -348.97458633

Sum of electronic and zero-point Energies= -348.812438

Sum of electronic and thermal Energies= -348.804394

Sum of electronic and thermal Enthalpies= -348.803450

Sum of electronic and thermal Free Energies= -348.845468

---

| Center<br>Number | Atomic<br>Number | Atomic<br>Type | Coordinates (Angstroms) |          |           |
|------------------|------------------|----------------|-------------------------|----------|-----------|
|                  |                  |                | X                       | Y        | Z         |
| 1                | 6                | 0              | 1.694989                | 0.123720 | -0.024703 |
| 2                | 6                | 0              | 2.351624                | 1.245243 | -0.364942 |

|    |   |   |           |           |           |
|----|---|---|-----------|-----------|-----------|
| 3  | 1 | 0 | 3.438140  | 1.282911  | -0.354965 |
| 4  | 1 | 0 | 1.841134  | 2.150379  | -0.682214 |
| 5  | 6 | 0 | 0.206085  | 0.056876  | -0.009248 |
| 6  | 6 | 0 | -0.466558 | -1.165738 | -0.190400 |
| 7  | 6 | 0 | -0.576661 | 1.209751  | 0.197320  |
| 8  | 6 | 0 | -1.861360 | -1.229316 | -0.193581 |
| 9  | 1 | 0 | 0.100791  | -2.078486 | -0.343503 |
| 10 | 6 | 0 | -1.968697 | 1.147314  | 0.195140  |
| 11 | 1 | 0 | -0.088316 | 2.161698  | 0.383737  |
| 12 | 6 | 0 | -2.620264 | -0.073474 | -0.003842 |
| 13 | 1 | 0 | -2.354041 | -2.186724 | -0.343509 |
| 14 | 1 | 0 | -2.546417 | 2.053208  | 0.361015  |
| 15 | 1 | 0 | -3.705962 | -0.122980 | -0.001092 |
| 16 | 6 | 0 | 2.461783  | -1.127930 | 0.340755  |
| 17 | 1 | 0 | 3.533654  | -0.919122 | 0.409513  |
| 18 | 1 | 0 | 2.127357  | -1.540743 | 1.300859  |
| 19 | 1 | 0 | 2.328007  | -1.918817 | -0.408827 |

---

**TS1<sub>endo</sub>**

Imaginary frequency= -148.49

Total energy= -2329.04861152

Sum of electronic and zero-point Energies= -2328.283898

Sum of electronic and thermal Energies= -2328.236306

Sum of electronic and thermal Enthalpies= -2328.235362

Sum of electronic and thermal Free Energies= -2328.367483

---

| Center<br>Number | Atomic<br>Number | Atomic<br>Type | Coordinates (Angstroms) |           |           |
|------------------|------------------|----------------|-------------------------|-----------|-----------|
|                  |                  |                | X                       | Y         | Z         |
| 1                | 45               | 0              | -0.089163               | -0.842431 | -0.620782 |
| 2                | 6                | 0              | 2.984027                | -0.354069 | -1.589770 |
| 3                | 1                | 0              | 3.364346                | -1.296124 | -1.183472 |
| 4                | 7                | 0              | 3.036711                | 1.811169  | -0.587211 |
| 5                | 6                | 0              | 1.825720                | 1.269956  | -0.417734 |
| 6                | 6                | 0              | 3.527793                | 3.063543  | -0.089283 |
| 7                | 7                | 0              | 1.744424                | 0.004972  | -0.854559 |
| 8                | 6                | 0              | 3.936545                | 0.813105  | -1.202050 |
| 9                | 1                | 0              | 4.452859                | 1.267493  | -2.050718 |
| 10               | 7                | 0              | -2.046949               | -0.817687 | -0.908791 |
| 11               | 6                | 0              | -4.394308               | -1.058823 | -1.192911 |
| 12               | 1                | 0              | -5.015465               | -1.632356 | -0.499735 |
| 13               | 7                | 0              | -4.006622               | 0.205000  | -0.525060 |
| 14               | 6                | 0              | -3.036887               | -1.732014 | -1.517337 |

|    |   |   |           |           |           |
|----|---|---|-----------|-----------|-----------|
| 15 | 1 | 0 | -2.871569 | -1.714692 | -2.602558 |
| 16 | 6 | 0 | -5.863220 | 1.748105  | -0.911676 |
| 17 | 1 | 0 | -5.746629 | 1.597343  | -1.983315 |
| 18 | 6 | 0 | -1.822277 | 1.344382  | 0.095815  |
| 19 | 6 | 0 | -1.043577 | 3.543737  | 0.733371  |
| 20 | 1 | 0 | -1.259741 | 4.557623  | 1.056586  |
| 21 | 6 | 0 | -5.003667 | 1.104538  | -0.015104 |
| 22 | 6 | 0 | 3.829259  | 3.213232  | 1.268424  |
| 23 | 1 | 0 | 3.672012  | 2.383658  | 1.952674  |
| 24 | 6 | 0 | -5.145846 | 1.281764  | 1.362948  |
| 25 | 1 | 0 | -4.486915 | 0.759824  | 2.050823  |
| 26 | 6 | 0 | 3.747344  | 4.120719  | -0.980657 |
| 27 | 1 | 0 | 3.513775  | 3.998178  | -2.033540 |
| 28 | 6 | 0 | -0.482580 | 0.962886  | -0.050943 |
| 29 | 6 | 0 | -2.102328 | 2.661095  | 0.510622  |
| 30 | 1 | 0 | -3.122702 | 3.002827  | 0.638911  |
| 31 | 6 | 0 | 0.288467  | 3.175495  | 0.497810  |
| 32 | 1 | 0 | 1.075983  | 3.907292  | 0.629651  |
| 33 | 6 | 0 | 0.576100  | 1.866858  | 0.076515  |
| 34 | 6 | 0 | -6.144048 | 2.132415  | 1.840815  |
| 35 | 1 | 0 | -6.253898 | 2.269548  | 2.912205  |
| 36 | 6 | 0 | -2.691648 | 0.286369  | -0.401567 |
| 37 | 6 | 0 | 4.255452  | 5.325820  | -0.504868 |
| 38 | 1 | 0 | 4.420813  | 6.145630  | -1.200287 |
| 39 | 6 | 0 | 4.335419  | 4.429399  | 1.730985  |
| 40 | 1 | 0 | 4.567347  | 4.540389  | 2.786352  |
| 41 | 6 | 0 | -7.012551 | 2.798128  | 0.962691  |
| 42 | 6 | 0 | 4.556735  | 5.504543  | 0.858373  |
| 43 | 6 | 0 | -6.853966 | 2.592139  | -0.418418 |
| 44 | 1 | 0 | -7.516787 | 3.096856  | -1.114896 |
| 45 | 6 | 0 | -8.099486 | 3.706799  | 1.483156  |
| 46 | 1 | 0 | -8.016099 | 4.713836  | 1.047053  |
| 47 | 1 | 0 | -8.055148 | 3.799402  | 2.575349  |
| 48 | 1 | 0 | -9.094816 | 3.323522  | 1.214158  |
| 49 | 6 | 0 | 5.095017  | 6.821070  | 1.359278  |
| 50 | 1 | 0 | 5.994492  | 7.117427  | 0.806226  |
| 51 | 1 | 0 | 5.350749  | 6.769741  | 2.422033  |
| 52 | 1 | 0 | 4.360120  | 7.625779  | 1.228596  |
| 53 | 1 | 0 | -4.983662 | -0.830967 | -2.085529 |
| 54 | 1 | 0 | 4.683014  | 0.503308  | -0.464626 |
| 55 | 6 | 0 | 2.782579  | -0.575010 | -3.122876 |
| 56 | 6 | 0 | -2.892171 | -3.217554 | -1.052661 |
| 57 | 6 | 0 | -4.032221 | -4.018357 | -1.714252 |
| 58 | 1 | 0 | -3.920667 | -5.084780 | -1.482760 |



|    |   |   |           |           |           |
|----|---|---|-----------|-----------|-----------|
| 59 | 1 | 0 | -5.018882 | -3.706207 | -1.353925 |
| 60 | 1 | 0 | -4.013763 | -3.909443 | -2.806201 |
| 61 | 6 | 0 | -1.551877 | -3.784582 | -1.557440 |
| 62 | 1 | 0 | -1.469420 | -3.699771 | -2.648227 |
| 63 | 1 | 0 | -0.672173 | -3.291655 | -1.113113 |
| 64 | 1 | 0 | -1.474585 | -4.848341 | -1.297511 |
| 65 | 6 | 0 | -2.970371 | -3.353052 | 0.478487  |
| 66 | 1 | 0 | -2.122725 | -2.870331 | 0.976397  |
| 67 | 1 | 0 | -3.896056 | -2.931836 | 0.888164  |
| 68 | 1 | 0 | -2.947593 | -4.416626 | 0.751268  |
| 69 | 6 | 0 | 1.857209  | -1.784919 | -3.345688 |
| 70 | 1 | 0 | 2.269719  | -2.696598 | -2.897139 |
| 71 | 1 | 0 | 0.856486  | -1.615683 | -2.925249 |
| 72 | 1 | 0 | 1.733933  | -1.972267 | -4.420098 |
| 73 | 6 | 0 | 4.153158  | -0.904264 | -3.746960 |
| 74 | 1 | 0 | 4.857162  | -0.066904 | -3.689813 |
| 75 | 1 | 0 | 4.615265  | -1.771242 | -3.258688 |
| 76 | 1 | 0 | 4.028916  | -1.150337 | -4.808766 |
| 77 | 6 | 0 | 2.179592  | 0.665052  | -3.808904 |
| 78 | 1 | 0 | 2.816477  | 1.549317  | -3.691997 |
| 79 | 1 | 0 | 2.072561  | 0.482885  | -4.881830 |
| 80 | 1 | 0 | 1.187109  | 0.904564  | -3.410310 |
| 81 | 8 | 0 | 0.628279  | -1.375076 | 1.701814  |
| 82 | 8 | 0 | 1.911858  | -3.154362 | 0.067789  |
| 83 | 6 | 0 | 1.311429  | -2.270188 | 2.180506  |
| 84 | 6 | 0 | 2.033212  | -3.271176 | 1.259783  |
| 85 | 8 | 0 | 1.507667  | -2.499493 | 3.452526  |
| 86 | 6 | 0 | 0.875577  | -1.603042 | 4.413506  |
| 87 | 1 | 0 | 1.147428  | -2.002267 | 5.387949  |
| 88 | 1 | 0 | 1.270821  | -0.593567 | 4.278691  |
| 89 | 1 | 0 | -0.207906 | -1.618796 | 4.266506  |
| 90 | 6 | 0 | 2.893622  | -4.393576 | 1.890116  |
| 91 | 9 | 0 | 3.877465  | -3.856611 | 2.632201  |
| 92 | 9 | 0 | 3.437471  | -5.147438 | 0.931858  |
| 93 | 9 | 0 | 2.127887  | -5.167301 | 2.674784  |

---

**TS1<sub>exo</sub>**

Imaginary frequency= -167.24

Total energy= -2329.04586156

Sum of electronic and zero-point Energies= -2328.282347

Sum of electronic and thermal Energies= -2328.234345

Sum of electronic and thermal Enthalpies= -2328.233401

Sum of electronic and thermal Free Energies= -2328.367632

| Center<br>Number | Atomic<br>Number | Atomic<br>Type | Coordinates (Angstroms) |           |           |
|------------------|------------------|----------------|-------------------------|-----------|-----------|
|                  |                  |                | X                       | Y         | Z         |
| 1                | 45               | 0              | -0.081245               | -0.914085 | -0.890765 |
| 2                | 6                | 0              | 3.096893                | -0.723005 | -1.651171 |
| 3                | 1                | 0              | 3.337160                | -1.709898 | -1.239927 |
| 4                | 7                | 0              | 3.301571                | 1.396137  | -0.572038 |
| 5                | 6                | 0              | 2.031872                | 0.974892  | -0.501998 |
| 6                | 6                | 0              | 3.863296                | 2.595110  | -0.020396 |
| 7                | 7                | 0              | 1.848509                | -0.253224 | -1.005652 |
| 8                | 6                | 0              | 4.137341                | 0.330685  | -1.167982 |
| 9                | 1                | 0              | 4.746866                | 0.753004  | -1.966880 |
| 10               | 7                | 0              | -2.101344               | -0.794575 | -0.938712 |
| 11               | 6                | 0              | -4.481139               | -0.782640 | -1.085326 |
| 12               | 1                | 0              | -5.142699               | -1.248840 | -0.350958 |
| 13               | 7                | 0              | -3.913124               | 0.451413  | -0.497842 |
| 14               | 6                | 0              | -3.226806               | -1.624715 | -1.428720 |
| 15               | 1                | 0              | -3.124409               | -1.693586 | -2.518856 |
| 16               | 6                | 0              | -4.957122               | 2.595978  | -1.046392 |
| 17               | 1                | 0              | -4.451443               | 2.582940  | -2.007531 |
| 18               | 6                | 0              | -1.604413               | 1.331640  | 0.057664  |
| 19               | 6                | 0              | -0.627180               | 3.379236  | 0.894655  |
| 20               | 1                | 0              | -0.744493               | 4.358753  | 1.344838  |
| 21               | 6                | 0              | -4.756948               | 1.558655  | -0.132341 |
| 22               | 6                | 0              | 4.044293                | 3.711494  | -0.840116 |
| 23               | 1                | 0              | 3.740903                | 3.674350  | -1.882817 |
| 24               | 6                | 0              | -5.404260               | 1.557223  | 1.104630  |
| 25               | 1                | 0              | -5.238442               | 0.742637  | 1.803734  |
| 26               | 6                | 0              | 4.253449                | 2.632573  | 1.321986  |
| 27               | 1                | 0              | 4.113366                | 1.758885  | 1.952752  |
| 28               | 6                | 0              | -0.308206               | 0.875796  | -0.205932 |
| 29               | 6                | 0              | -1.762127               | 2.607635  | 0.632735  |
| 30               | 1                | 0              | -2.743029               | 3.005406  | 0.855609  |
| 31               | 6                | 0              | 0.664048                | 2.933612  | 0.569250  |
| 32               | 1                | 0              | 1.514503                | 3.573206  | 0.766400  |
| 33               | 6                | 0              | 0.829656                | 1.661705  | -0.007929 |
| 34               | 6                | 0              | -6.250872               | 2.615173  | 1.431285  |
| 35               | 1                | 0              | -6.748365               | 2.618996  | 2.396445  |
| 36               | 6                | 0              | -2.593102               | 0.368291  | -0.424388 |
| 37               | 6                | 0              | 4.810348                | 3.800437  | 1.841694  |
| 38               | 1                | 0              | 5.106909                | 3.829300  | 2.887603  |
| 39               | 6                | 0              | 4.605272                | 4.872017  | -0.305736 |
| 40               | 1                | 0              | 4.738212                | 5.741237  | -0.943508 |

|    |   |   |           |           |           |
|----|---|---|-----------|-----------|-----------|
| 41 | 6 | 0 | -6.471393 | 3.673026  | 0.534136  |
| 42 | 6 | 0 | 4.997045  | 4.936831  | 1.039513  |
| 43 | 6 | 0 | -5.808637 | 3.647712  | -0.704004 |
| 44 | 1 | 0 | -5.962804 | 4.458375  | -1.411622 |
| 45 | 6 | 0 | -7.422009 | 4.790856  | 0.880096  |
| 46 | 1 | 0 | -7.154375 | 5.721290  | 0.362597  |
| 47 | 1 | 0 | -7.437171 | 4.986569  | 1.958429  |
| 48 | 1 | 0 | -8.449140 | 4.537228  | 0.579867  |
| 49 | 6 | 0 | 5.622278  | 6.188096  | 1.607220  |
| 50 | 1 | 0 | 5.287470  | 6.371496  | 2.633865  |
| 51 | 1 | 0 | 5.376360  | 7.067269  | 1.002431  |
| 52 | 1 | 0 | 6.716959  | 6.103597  | 1.632972  |
| 53 | 1 | 0 | -5.070836 | -0.519126 | -1.968015 |
| 54 | 1 | 0 | 4.804083  | -0.076123 | -0.398428 |
| 55 | 6 | 0 | 2.982882  | -0.899568 | -3.197116 |
| 56 | 6 | 0 | -3.221461 | -3.089585 | -0.890165 |
| 57 | 6 | 0 | -4.475038 | -3.797201 | -1.445372 |
| 58 | 1 | 0 | -4.455897 | -4.857406 | -1.163271 |
| 59 | 1 | 0 | -5.405342 | -3.368926 | -1.052440 |
| 60 | 1 | 0 | -4.511388 | -3.743470 | -2.540785 |
| 61 | 6 | 0 | -1.976739 | -3.810106 | -1.431724 |
| 62 | 1 | 0 | -1.947159 | -3.784641 | -2.528211 |
| 63 | 1 | 0 | -1.044479 | -3.363141 | -1.053751 |
| 64 | 1 | 0 | -1.981203 | -4.860150 | -1.119046 |
| 65 | 6 | 0 | -3.228921 | -3.138481 | 0.647932  |
| 66 | 1 | 0 | -2.329012 | -2.682692 | 1.074928  |
| 67 | 1 | 0 | -4.100300 | -2.626640 | 1.075135  |
| 68 | 1 | 0 | -3.267396 | -4.179919 | 0.984357  |
| 69 | 6 | 0 | 1.936506  | -1.988356 | -3.503478 |
| 70 | 1 | 0 | 2.204843  | -2.942462 | -3.035657 |
| 71 | 1 | 0 | 0.932303  | -1.705045 | -3.149732 |
| 72 | 1 | 0 | 1.868428  | -2.154144 | -4.585832 |
| 73 | 6 | 0 | 4.348418  | -1.389177 | -3.727482 |
| 74 | 1 | 0 | 5.139701  | -0.643639 | -3.592969 |
| 75 | 1 | 0 | 4.661425  | -2.314733 | -3.226234 |
| 76 | 1 | 0 | 4.275236  | -1.598719 | -4.802932 |
| 77 | 6 | 0 | 2.587743  | 0.410155  | -3.902623 |
| 78 | 1 | 0 | 3.306963  | 1.216445  | -3.715040 |
| 79 | 1 | 0 | 2.551736  | 0.255252  | -4.986564 |
| 80 | 1 | 0 | 1.594474  | 0.754952  | -3.585010 |
| 81 | 8 | 0 | 1.534708  | -3.464951 | -0.031517 |
| 82 | 8 | 0 | 0.457470  | -1.444826 | 1.513245  |
| 83 | 6 | 0 | 1.640238  | -3.498383 | 1.176365  |
| 84 | 6 | 0 | 0.981026  | -2.407065 | 2.032903  |

|    |   |   |          |           |          |
|----|---|---|----------|-----------|----------|
| 85 | 8 | 0 | 2.272111 | -4.388541 | 1.913322 |
| 86 | 6 | 0 | 2.925946 | -5.483555 | 1.209406 |
| 87 | 1 | 0 | 3.394579 | -6.079441 | 1.991736 |
| 88 | 1 | 0 | 2.178474 | -6.064697 | 0.670906 |
| 89 | 1 | 0 | 3.673322 | -5.083103 | 0.519684 |
| 90 | 6 | 0 | 0.948537 | -2.550808 | 3.576099 |
| 91 | 9 | 0 | 0.322934 | -3.692533 | 3.903058 |
| 92 | 9 | 0 | 0.286352 | -1.524363 | 4.115882 |
| 93 | 9 | 0 | 2.196629 | -2.570396 | 4.062440 |

---

**M1<sub>endo</sub>**

Total energy= -2329.06563526

Sum of electronic and zero-point Energies= -2328.299154

Sum of electronic and thermal Energies= -2328.251258

Sum of electronic and thermal Enthalpies= -2328.250314

Sum of electronic and thermal Free Energies= -2328.382283

---

| Center<br>Number | Atomic<br>Number | Atomic<br>Type | Coordinates (Angstroms) |           |           |
|------------------|------------------|----------------|-------------------------|-----------|-----------|
|                  |                  |                | X                       | Y         | Z         |
| 1                | 45               | 0              | -0.007071               | -0.889219 | -0.722386 |
| 2                | 6                | 0              | 3.276055                | -0.878357 | -1.076789 |
| 3                | 1                | 0              | 3.440265                | -1.837932 | -0.577109 |
| 4                | 7                | 0              | 3.429827                | 1.327540  | -0.180840 |
| 5                | 6                | 0              | 2.147709                | 0.938475  | -0.213205 |
| 6                | 6                | 0              | 3.965513                | 2.615242  | 0.151791  |
| 7                | 7                | 0              | 1.982671                | -0.315791 | -0.622031 |
| 8                | 6                | 0              | 4.290555                | 0.176889  | -0.543846 |
| 9                | 1                | 0              | 5.026394                | 0.491274  | -1.285880 |
| 10               | 7                | 0              | -2.112488               | -0.754284 | -0.779270 |
| 11               | 6                | 0              | -4.470102               | -0.661302 | -1.025619 |
| 12               | 1                | 0              | -5.055376               | -1.045671 | -0.182397 |
| 13               | 7                | 0              | -3.867460               | 0.633903  | -0.641350 |
| 14               | 6                | 0              | -3.233930               | -1.539229 | -1.359717 |
| 15               | 1                | 0              | -3.089996               | -1.552004 | -2.449300 |
| 16               | 6                | 0              | -5.160885               | 2.621478  | -1.233109 |
| 17               | 1                | 0              | -4.872791               | 2.476756  | -2.270484 |
| 18               | 6                | 0              | -1.530872               | 1.455186  | -0.060351 |
| 19               | 6                | 0              | -0.537674               | 3.550802  | 0.641318  |
| 20               | 1                | 0              | -0.661152               | 4.578157  | 0.968448  |
| 21               | 6                | 0              | -4.685955               | 1.745197  | -0.254545 |
| 22               | 6                | 0              | 4.366545                | 2.889215  | 1.463878  |
| 23               | 1                | 0              | 4.249665                | 2.131606  | 2.233666  |

|    |   |   |           |           |           |
|----|---|---|-----------|-----------|-----------|
| 24 | 6 | 0 | -5.059456 | 1.918939  | 1.083737  |
| 25 | 1 | 0 | -4.696691 | 1.227785  | 1.839512  |
| 26 | 6 | 0 | 4.117326  | 3.583000  | -0.844909 |
| 27 | 1 | 0 | 3.808817  | 3.363089  | -1.862687 |
| 28 | 6 | 0 | -0.231483 | 0.961980  | -0.178677 |
| 29 | 6 | 0 | -1.676703 | 2.790384  | 0.354502  |
| 30 | 1 | 0 | -2.657063 | 3.239083  | 0.457265  |
| 31 | 6 | 0 | 0.755174  | 3.032747  | 0.509311  |
| 32 | 1 | 0 | 1.610282  | 3.659376  | 0.732194  |
| 33 | 6 | 0 | 0.922182  | 1.705158  | 0.081429  |
| 34 | 6 | 0 | -5.890165 | 2.980940  | 1.435095  |
| 35 | 1 | 0 | -6.172353 | 3.114277  | 2.476683  |
| 36 | 6 | 0 | -2.544907 | 0.460121  | -0.465356 |
| 37 | 6 | 0 | 4.655566  | 4.828873  | -0.520472 |
| 38 | 1 | 0 | 4.763228  | 5.581201  | -1.297543 |
| 39 | 6 | 0 | 4.902663  | 4.138078  | 1.773917  |
| 40 | 1 | 0 | 5.204547  | 4.348030  | 2.797119  |
| 41 | 6 | 0 | -6.374522 | 3.876866  | 0.467139  |
| 42 | 6 | 0 | 5.057281  | 5.127836  | 0.789247  |
| 43 | 6 | 0 | -5.996589 | 3.678420  | -0.868094 |
| 44 | 1 | 0 | -6.359772 | 4.359168  | -1.633576 |
| 45 | 6 | 0 | -7.283029 | 5.015221  | 0.862854  |
| 46 | 1 | 0 | -6.816192 | 5.648387  | 1.627328  |
| 47 | 1 | 0 | -8.222915 | 4.640959  | 1.287977  |
| 48 | 1 | 0 | -7.530652 | 5.646836  | 0.004067  |
| 49 | 6 | 0 | 5.653757  | 6.471095  | 1.132106  |
| 50 | 1 | 0 | 5.508935  | 7.190282  | 0.319967  |
| 51 | 1 | 0 | 6.733339  | 6.388208  | 1.314362  |
| 52 | 1 | 0 | 5.206793  | 6.886392  | 2.042798  |
| 53 | 1 | 0 | -5.135265 | -0.529973 | -1.881043 |
| 54 | 1 | 0 | 4.823165  | -0.172166 | 0.347202  |
| 55 | 6 | 0 | 3.331044  | -1.143199 | -2.618112 |
| 56 | 6 | 0 | -3.326302 | -3.018931 | -0.897007 |
| 57 | 6 | 0 | -4.617216 | -3.628140 | -1.482567 |
| 58 | 1 | 0 | -4.660417 | -4.700121 | -1.258063 |
| 59 | 1 | 0 | -5.518487 | -3.167480 | -1.062077 |
| 60 | 1 | 0 | -4.652886 | -3.514805 | -2.573188 |
| 61 | 6 | 0 | -2.124088 | -3.792018 | -1.468832 |
| 62 | 1 | 0 | -2.125375 | -3.770187 | -2.566106 |
| 63 | 1 | 0 | -1.171124 | -3.373415 | -1.124585 |
| 64 | 1 | 0 | -2.155850 | -4.842344 | -1.155607 |
| 65 | 6 | 0 | -3.348443 | -3.141556 | 0.635863  |
| 66 | 1 | 0 | -2.436234 | -2.736143 | 1.088080  |
| 67 | 1 | 0 | -4.201736 | -2.614707 | 1.078352  |

|    |   |   |           |           |           |
|----|---|---|-----------|-----------|-----------|
| 68 | 1 | 0 | -3.428694 | -4.195582 | 0.926584  |
| 69 | 6 | 0 | 2.207906  | -2.117259 | -3.024257 |
| 70 | 1 | 0 | 2.272319  | -3.062823 | -2.474162 |
| 71 | 1 | 0 | 1.204817  | -1.692354 | -2.850400 |
| 72 | 1 | 0 | 2.275644  | -2.344973 | -4.094397 |
| 73 | 6 | 0 | 4.683906  | -1.815048 | -2.932784 |
| 74 | 1 | 0 | 5.534438  | -1.164830 | -2.698012 |
| 75 | 1 | 0 | 4.804349  | -2.748058 | -2.368096 |
| 76 | 1 | 0 | 4.743112  | -2.059130 | -3.999512 |
| 77 | 6 | 0 | 3.189577  | 0.151984  | -3.438018 |
| 78 | 1 | 0 | 3.998519  | 0.863115  | -3.236671 |
| 79 | 1 | 0 | 3.223360  | -0.081028 | -4.508671 |
| 80 | 1 | 0 | 2.234437  | 0.655386  | -3.244157 |
| 81 | 8 | 0 | -0.064158 | -1.274028 | 1.261598  |
| 82 | 8 | 0 | 0.995491  | -3.425490 | -0.101846 |
| 83 | 6 | 0 | 0.416091  | -2.251977 | 1.862494  |
| 84 | 6 | 0 | 1.033530  | -3.424178 | 1.103564  |
| 85 | 8 | 0 | 0.414111  | -2.372364 | 3.147072  |
| 86 | 6 | 0 | -0.154453 | -1.295885 | 3.970205  |
| 87 | 1 | 0 | -0.049027 | -1.653266 | 4.991625  |
| 88 | 1 | 0 | 0.421857  | -0.384766 | 3.802319  |
| 89 | 1 | 0 | -1.202355 | -1.159173 | 3.700271  |
| 90 | 6 | 0 | 1.690504  | -4.571978 | 1.907036  |
| 91 | 9 | 0 | 2.666982  | -4.072752 | 2.679085  |
| 92 | 9 | 0 | 2.205271  | -5.469497 | 1.071499  |
| 93 | 9 | 0 | 0.773772  | -5.162915 | 2.684947  |

---

**M1<sub>exo</sub>**

Total energy= -2329.06131129

Sum of electronic and zero-point Energies= -2328.295059

Sum of electronic and thermal Energies= -2328.247290

Sum of electronic and thermal Enthalpies= -2328.246346

Sum of electronic and thermal Free Energies= -2328.376556

---

| Center<br>Number | Atomic<br>Number | Atomic<br>Type | Coordinates (Angstroms) |           |           |
|------------------|------------------|----------------|-------------------------|-----------|-----------|
|                  |                  |                | X                       | Y         | Z         |
| 1                | 45               | 0              | -0.004109               | -0.957973 | -0.816834 |
| 2                | 6                | 0              | 3.268623                | -0.900175 | -1.216885 |
| 3                | 1                | 0              | 3.451923                | -1.899762 | -0.807169 |
| 4                | 7                | 0              | 3.421455                | 1.224114  | -0.146779 |
| 5                | 6                | 0              | 2.144012                | 0.829364  | -0.183437 |
| 6                | 6                | 0              | 3.943136                | 2.509599  | 0.224713  |

|    |   |   |           |           |           |
|----|---|---|-----------|-----------|-----------|
| 7  | 7 | 0 | 1.977986  | -0.392258 | -0.688370 |
| 8  | 6 | 0 | 4.284089  | 0.114697  | -0.612827 |
| 9  | 1 | 0 | 5.008005  | 0.493581  | -1.339935 |
| 10 | 7 | 0 | -2.107577 | -0.831824 | -0.838071 |
| 11 | 6 | 0 | -4.435590 | -0.641753 | -1.258502 |
| 12 | 1 | 0 | -5.315497 | -1.000424 | -0.722114 |
| 13 | 7 | 0 | -3.866686 | 0.524857  | -0.553859 |
| 14 | 6 | 0 | -3.258360 | -1.661701 | -1.289298 |
| 15 | 1 | 0 | -3.067910 | -1.975880 | -2.320716 |
| 16 | 6 | 0 | -4.801306 | 2.662466  | -1.308349 |
| 17 | 1 | 0 | -4.302075 | 2.533876  | -2.262643 |
| 18 | 6 | 0 | -1.530155 | 1.305130  | 0.076224  |
| 19 | 6 | 0 | -0.540318 | 3.337684  | 0.941487  |
| 20 | 1 | 0 | -0.662936 | 4.333107  | 1.361828  |
| 21 | 6 | 0 | -4.649877 | 1.701628  | -0.305275 |
| 22 | 6 | 0 | 4.050877  | 3.514547  | -0.743390 |
| 23 | 1 | 0 | 3.726204  | 3.321540  | -1.763505 |
| 24 | 6 | 0 | -5.305214 | 1.852103  | 0.920364  |
| 25 | 1 | 0 | -5.194324 | 1.095378  | 1.688672  |
| 26 | 6 | 0 | 4.369743  | 2.747225  | 1.532840  |
| 27 | 1 | 0 | 4.291766  | 1.959220  | 2.278945  |
| 28 | 6 | 0 | -0.230175 | 0.827104  | -0.082747 |
| 29 | 6 | 0 | -1.677734 | 2.598676  | 0.609013  |
| 30 | 1 | 0 | -2.661024 | 3.026507  | 0.763143  |
| 31 | 6 | 0 | 0.753710  | 2.845356  | 0.737608  |
| 32 | 1 | 0 | 1.607473  | 3.462066  | 0.986065  |
| 33 | 6 | 0 | 0.921372  | 1.558600  | 0.202327  |
| 34 | 6 | 0 | -6.101186 | 2.979729  | 1.139104  |
| 35 | 1 | 0 | -6.609142 | 3.093206  | 2.095912  |
| 36 | 6 | 0 | -2.543938 | 0.351082  | -0.418502 |
| 37 | 6 | 0 | 4.886734  | 3.997326  | 1.872636  |
| 38 | 1 | 0 | 5.210369  | 4.178740  | 2.895741  |
| 39 | 6 | 0 | 4.567035  | 4.758824  | -0.390605 |
| 40 | 1 | 0 | 4.643824  | 5.537462  | -1.145574 |
| 41 | 6 | 0 | -6.261198 | 3.960678  | 0.152506  |
| 42 | 6 | 0 | 4.990369  | 5.024857  | 0.922362  |
| 43 | 6 | 0 | -5.600697 | 3.782177  | -1.073917 |
| 44 | 1 | 0 | -5.715613 | 4.527127  | -1.857794 |
| 45 | 6 | 0 | -7.099866 | 5.187853  | 0.401160  |
| 46 | 1 | 0 | -6.466473 | 6.069664  | 0.584399  |
| 47 | 1 | 0 | -7.750039 | 5.060204  | 1.275093  |
| 48 | 1 | 0 | -7.733338 | 5.422173  | -0.466575 |
| 49 | 6 | 0 | 5.528529  | 6.384935  | 1.293354  |
| 50 | 1 | 0 | 5.944069  | 6.390628  | 2.306024  |

|    |   |   |           |           |           |
|----|---|---|-----------|-----------|-----------|
| 51 | 1 | 0 | 4.737212  | 7.143831  | 1.251371  |
| 52 | 1 | 0 | 6.313528  | 6.705839  | 0.598988  |
| 53 | 1 | 0 | -4.744443 | -0.337610 | -2.264394 |
| 54 | 1 | 0 | 4.830823  | -0.300607 | 0.239994  |
| 55 | 6 | 0 | 3.287726  | -1.025713 | -2.776931 |
| 56 | 6 | 0 | -3.502809 | -2.959290 | -0.453351 |
| 57 | 6 | 0 | -4.731709 | -3.687184 | -1.035945 |
| 58 | 1 | 0 | -4.871661 | -4.647136 | -0.525720 |
| 59 | 1 | 0 | -5.658191 | -3.113164 | -0.915523 |
| 60 | 1 | 0 | -4.601985 | -3.894797 | -2.105618 |
| 61 | 6 | 0 | -2.288814 | -3.894763 | -0.599687 |
| 62 | 1 | 0 | -2.090789 | -4.137114 | -1.651752 |
| 63 | 1 | 0 | -1.384385 | -3.446085 | -0.179602 |
| 64 | 1 | 0 | -2.467592 | -4.837513 | -0.068310 |
| 65 | 6 | 0 | -3.735499 | -2.650694 | 1.035861  |
| 66 | 1 | 0 | -2.867610 | -2.154908 | 1.486263  |
| 67 | 1 | 0 | -4.611745 | -2.011791 | 1.194935  |
| 68 | 1 | 0 | -3.908761 | -3.581272 | 1.589179  |
| 69 | 6 | 0 | 2.194310  | -2.012654 | -3.224147 |
| 70 | 1 | 0 | 2.293218  | -2.981543 | -2.724584 |
| 71 | 1 | 0 | 1.181563  | -1.630992 | -3.024027 |
| 72 | 1 | 0 | 2.260682  | -2.181866 | -4.305693 |
| 73 | 6 | 0 | 4.656053  | -1.606291 | -3.197736 |
| 74 | 1 | 0 | 5.487368  | -0.941370 | -2.940330 |
| 75 | 1 | 0 | 4.840774  | -2.578450 | -2.722410 |
| 76 | 1 | 0 | 4.680282  | -1.757377 | -4.282582 |
| 77 | 6 | 0 | 3.066575  | 0.334629  | -3.461441 |
| 78 | 1 | 0 | 3.872151  | 1.044419  | -3.243864 |
| 79 | 1 | 0 | 3.035242  | 0.202993  | -4.551500 |
| 80 | 1 | 0 | 2.115414  | 0.790366  | -3.156530 |
| 81 | 8 | 0 | 1.169221  | -3.628968 | -0.495226 |
| 82 | 8 | 0 | 0.084475  | -1.575122 | 1.073911  |
| 83 | 6 | 0 | 1.361040  | -3.594428 | 0.705116  |
| 84 | 6 | 0 | 0.678245  | -2.535744 | 1.566078  |
| 85 | 8 | 0 | 2.095727  | -4.397263 | 1.436849  |
| 86 | 6 | 0 | 2.776570  | -5.490276 | 0.745425  |
| 87 | 1 | 0 | 3.287655  | -6.040807 | 1.532376  |
| 88 | 1 | 0 | 2.037841  | -6.112236 | 0.240874  |
| 89 | 1 | 0 | 3.490693  | -5.075442 | 0.029773  |
| 90 | 6 | 0 | 0.643729  | -2.652301 | 3.105967  |
| 91 | 9 | 0 | 0.125404  | -3.836387 | 3.451052  |
| 92 | 9 | 0 | -0.097789 | -1.676494 | 3.625940  |
| 93 | 9 | 0 | 1.892666  | -2.556922 | 3.574637  |

---



**TS2R<sub>endo</sub>**

Imaginary frequency= -154.12

Total energy= -2678.03130451

Sum of electronic and zero-point Energies= -2677.102401

Sum of electronic and thermal Energies= -2677.045510

Sum of electronic and thermal Enthalpies= -2677.044566

Sum of electronic and thermal Free Energies= -2677.198901

---

| Center<br>Number | Atomic<br>Number | Atomic<br>Type | Coordinates (Angstroms) |           |           |
|------------------|------------------|----------------|-------------------------|-----------|-----------|
|                  |                  |                | X                       | Y         | Z         |
| 1                | 45               | 0              | 0.318363                | -0.322203 | 0.979839  |
| 2                | 6                | 0              | -1.288521               | 2.461447  | 1.606862  |
| 3                | 1                | 0              | -2.263348               | 2.028376  | 1.378974  |
| 4                | 7                | 0              | 0.240454                | 3.747342  | 0.322333  |
| 5                | 6                | 0              | 0.621501                | 2.458505  | 0.326219  |
| 6                | 6                | 0              | 0.922183                | 4.892421  | -0.201089 |
| 7                | 7                | 0              | -0.241247               | 1.657073  | 0.938983  |
| 8                | 6                | 0              | -1.121216               | 3.836302  | 0.907827  |
| 9                | 1                | 0              | -1.172615               | 4.686348  | 1.589857  |
| 10               | 7                | 0              | 1.589250                | -2.007763 | 0.940860  |
| 11               | 6                | 0              | 2.964461                | -3.944504 | 0.991440  |
| 12               | 1                | 0              | 2.773162                | -4.670919 | 0.192615  |
| 13               | 7                | 0              | 3.640397                | -2.759887 | 0.421788  |
| 14               | 6                | 0              | 1.665770                | -3.343463 | 1.591460  |
| 15               | 1                | 0              | 1.821025                | -3.170103 | 2.666094  |
| 16               | 6                | 0              | 6.077791                | -2.564002 | 0.538028  |
| 17               | 1                | 0              | 5.985702                | -2.240551 | 1.570922  |
| 18               | 6                | 0              | 2.967458                | -0.376199 | -0.145284 |
| 19               | 6                | 0              | 4.025185                | 1.535051  | -1.194142 |
| 20               | 1                | 0              | 4.868442                | 1.956762  | -1.731720 |
| 21               | 6                | 0              | 4.928590                | -2.855243 | -0.200363 |
| 22               | 6                | 0              | 0.537157                | 5.427217  | -1.435729 |
| 23               | 1                | 0              | -0.246577               | 4.943759  | -2.011989 |
| 24               | 6                | 0              | 5.040842                | -3.282272 | -1.529703 |
| 25               | 1                | 0              | 4.146388                | -3.516511 | -2.100308 |
| 26               | 6                | 0              | 1.928041                | 5.512599  | 0.546221  |
| 27               | 1                | 0              | 2.215602                | 5.102224  | 1.509708  |
| 28               | 6                | 0              | 1.892958                | 0.461398  | 0.155173  |
| 29               | 6                | 0              | 4.057626                | 0.183206  | -0.834621 |
| 30               | 1                | 0              | 4.921739                | -0.415824 | -1.093580 |
| 31               | 6                | 0              | 2.942224                | 2.361450  | -0.874076 |
| 32               | 1                | 0              | 2.960017                | 3.406690  | -1.159867 |

|    |   |   |           |           |           |
|----|---|---|-----------|-----------|-----------|
| 33 | 6 | 0 | 1.850517  | 1.820674  | -0.177180 |
| 34 | 6 | 0 | 6.300344  | -3.399109 | -2.113826 |
| 35 | 1 | 0 | 6.379547  | -3.726613 | -3.147729 |
| 36 | 6 | 0 | 2.759099  | -1.741516 | 0.374011  |
| 37 | 6 | 0 | 2.554478  | 6.655812  | 0.047574  |
| 38 | 1 | 0 | 3.339843  | 7.129316  | 0.631180  |
| 39 | 6 | 0 | 1.164695  | 6.574804  | -1.917164 |
| 40 | 1 | 0 | 0.861330  | 6.983344  | -2.877985 |
| 41 | 6 | 0 | 7.467882  | -3.101496 | -1.391107 |
| 42 | 6 | 0 | 2.181273  | 7.209771  | -1.185146 |
| 43 | 6 | 0 | 7.334052  | -2.683093 | -0.059926 |
| 44 | 1 | 0 | 8.223634  | -2.448203 | 0.518831  |
| 45 | 6 | 0 | 8.825775  | -3.241046 | -2.035279 |
| 46 | 1 | 0 | 8.891143  | -2.653168 | -2.959046 |
| 47 | 1 | 0 | 9.029126  | -4.284861 | -2.306345 |
| 48 | 1 | 0 | 9.622722  | -2.907478 | -1.363592 |
| 49 | 6 | 0 | 2.832916  | 8.468955  | -1.702037 |
| 50 | 1 | 0 | 3.772405  | 8.676231  | -1.179930 |
| 51 | 1 | 0 | 2.176696  | 9.337592  | -1.557690 |
| 52 | 1 | 0 | 3.043183  | 8.400547  | -2.775382 |
| 53 | 1 | 0 | 3.598123  | -4.413312 | 1.746571  |
| 54 | 1 | 0 | -1.853556 | 3.983383  | 0.106548  |
| 55 | 6 | 0 | -1.133521 | 2.484435  | 3.166408  |
| 56 | 6 | 0 | 0.395385  | -4.222417 | 1.456976  |
| 57 | 6 | 0 | 0.689239  | -5.596461 | 2.093781  |
| 58 | 1 | 0 | -0.215477 | -6.215816 | 2.089823  |
| 59 | 1 | 0 | 1.464916  | -6.145673 | 1.547130  |
| 60 | 1 | 0 | 1.017417  | -5.492734 | 3.135600  |
| 61 | 6 | 0 | -0.746127 | -3.551687 | 2.242732  |
| 62 | 1 | 0 | -0.482654 | -3.443827 | 3.302932  |
| 63 | 1 | 0 | -0.982015 | -2.555955 | 1.848597  |
| 64 | 1 | 0 | -1.658565 | -4.157339 | 2.189084  |
| 65 | 6 | 0 | -0.018673 | -4.412041 | -0.012452 |
| 66 | 1 | 0 | -0.224276 | -3.452114 | -0.498826 |
| 67 | 1 | 0 | 0.757288  | -4.921235 | -0.595696 |
| 68 | 1 | 0 | -0.924536 | -5.027113 | -0.071372 |
| 69 | 6 | 0 | -1.081057 | 1.042268  | 3.703356  |
| 70 | 1 | 0 | -1.934010 | 0.446425  | 3.359386  |
| 71 | 1 | 0 | -0.153436 | 0.534250  | 3.391911  |
| 72 | 1 | 0 | -1.085126 | 1.043556  | 4.799899  |
| 73 | 6 | 0 | -2.378898 | 3.182004  | 3.750076  |
| 74 | 1 | 0 | -2.472763 | 4.216294  | 3.398813  |
| 75 | 1 | 0 | -3.297288 | 2.648165  | 3.475516  |
| 76 | 1 | 0 | -2.320803 | 3.210071  | 4.844364  |

|     |   |   |           |           |           |
|-----|---|---|-----------|-----------|-----------|
| 77  | 6 | 0 | 0.138082  | 3.221570  | 3.625645  |
| 78  | 1 | 0 | 0.135800  | 4.279421  | 3.341295  |
| 79  | 1 | 0 | 0.213092  | 3.182337  | 4.718983  |
| 80  | 1 | 0 | 1.045461  | 2.757073  | 3.221103  |
| 81  | 8 | 0 | -0.250927 | -0.697289 | -0.919896 |
| 82  | 8 | 0 | -2.390740 | -0.596778 | 0.783943  |
| 83  | 6 | 0 | -1.414828 | -0.695529 | -1.374051 |
| 84  | 6 | 0 | -2.654920 | -0.616118 | -0.456995 |
| 85  | 8 | 0 | -1.626816 | -0.760530 | -2.654376 |
| 86  | 6 | 0 | -0.481154 | -0.783644 | -3.564995 |
| 87  | 1 | 0 | -0.922391 | -0.786464 | -4.559393 |
| 88  | 1 | 0 | 0.126402  | 0.108120  | -3.405436 |
| 89  | 1 | 0 | 0.100262  | -1.690252 | -3.390134 |
| 90  | 6 | 0 | -3.630383 | 0.494404  | -0.947560 |
| 91  | 9 | 0 | -2.937430 | 1.659490  | -1.053549 |
| 92  | 9 | 0 | -4.606210 | 0.679698  | -0.049382 |
| 93  | 9 | 0 | -4.193245 | 0.266306  | -2.145616 |
| 94  | 6 | 0 | -8.308168 | -1.259547 | -0.523348 |
| 95  | 6 | 0 | -7.073332 | -1.592270 | 0.018381  |
| 96  | 6 | 0 | -6.014475 | -2.035001 | -0.812811 |
| 97  | 6 | 0 | -6.258269 | -2.153697 | -2.204301 |
| 98  | 6 | 0 | -7.504240 | -1.844664 | -2.735318 |
| 99  | 6 | 0 | -8.529570 | -1.389700 | -1.899127 |
| 100 | 1 | 0 | -9.101817 | -0.900233 | 0.124723  |
| 101 | 1 | 0 | -6.915208 | -1.471481 | 1.083822  |
| 102 | 1 | 0 | -5.484164 | -2.532841 | -2.862045 |
| 103 | 1 | 0 | -7.680769 | -1.961213 | -3.800207 |
| 104 | 1 | 0 | -9.500961 | -1.142796 | -2.317874 |
| 105 | 6 | 0 | -4.713764 | -2.359633 | -0.252193 |
| 106 | 6 | 0 | -4.541145 | -2.682973 | 1.186855  |
| 107 | 1 | 0 | -3.923488 | -1.876946 | 1.629531  |
| 108 | 1 | 0 | -5.470101 | -2.795204 | 1.744245  |
| 109 | 1 | 0 | -3.944023 | -3.595539 | 1.294832  |
| 110 | 6 | 0 | -3.520787 | -2.274601 | -1.015961 |
| 111 | 1 | 0 | -2.716996 | -2.936073 | -0.693650 |
| 112 | 1 | 0 | -3.606840 | -2.177003 | -2.093493 |

---

**TS2S<sub>endo</sub>**

Imaginary frequency= -185.17

Total energy= -2678.02909483

Sum of electronic and zero-point Energies= -2677.100250

Sum of electronic and thermal Energies= -2677.043659

Sum of electronic and thermal Enthalpies= -2677.042715

Sum of electronic and thermal Free Energies= -2677.193478

| Center<br>Number | Atomic<br>Number | Atomic<br>Type | Coordinates (Angstroms) |           |           |
|------------------|------------------|----------------|-------------------------|-----------|-----------|
|                  |                  |                | X                       | Y         | Z         |
| 1                | 45               | 0              | 0.258911                | -0.309595 | 0.774092  |
| 2                | 6                | 0              | -1.394648               | 2.362865  | 1.694471  |
| 3                | 1                | 0              | -2.388581               | 1.957296  | 1.497421  |
| 4                | 7                | 0              | 0.046217                | 3.802127  | 0.474372  |
| 5                | 6                | 0              | 0.441580                | 2.524595  | 0.329345  |
| 6                | 6                | 0              | 0.578551                | 4.967631  | -0.164909 |
| 7                | 7                | 0              | -0.400953               | 1.645347  | 0.864561  |
| 8                | 6                | 0              | -1.279547               | 3.807248  | 1.136707  |
| 9                | 1                | 0              | -1.310171               | 4.580838  | 1.905869  |
| 10               | 7                | 0              | 1.638908                | -1.954162 | 0.601339  |
| 11               | 6                | 0              | 3.231559                | -3.718128 | 0.758474  |
| 12               | 1                | 0              | 3.200608                | -4.422345 | -0.080856 |
| 13               | 7                | 0              | 3.815813                | -2.445396 | 0.303096  |
| 14               | 6                | 0              | 1.822263                | -3.295589 | 1.244105  |
| 15               | 1                | 0              | 1.861614                | -3.121512 | 2.329368  |
| 16               | 6                | 0              | 6.162392                | -1.908986 | 0.753711  |
| 17               | 1                | 0              | 5.876836                | -1.580452 | 1.749026  |
| 18               | 6                | 0              | 2.962293                | -0.129469 | -0.237906 |
| 19               | 6                | 0              | 3.938507                | 1.902459  | -1.122968 |
| 20               | 1                | 0              | 4.773150                | 2.408061  | -1.597986 |
| 21               | 6                | 0              | 5.179765                | -2.367065 | -0.131063 |
| 22               | 6                | 0              | 0.449957                | 5.137075  | -1.546956 |
| 23               | 1                | 0              | -0.038675               | 4.371746  | -2.143675 |
| 24               | 6                | 0              | 5.538692                | -2.804993 | -1.408575 |
| 25               | 1                | 0              | 4.775035                | -3.167563 | -2.091049 |
| 26               | 6                | 0              | 1.187690                | 5.962731  | 0.608001  |
| 27               | 1                | 0              | 1.280145                | 5.829045  | 1.681824  |
| 28               | 6                | 0              | 1.825381                | 0.614758  | 0.073044  |
| 29               | 6                | 0              | 4.039086                | 0.534443  | -0.850824 |
| 30               | 1                | 0              | 4.943640                | 0.003189  | -1.119902 |
| 31               | 6                | 0              | 2.794205                | 2.637792  | -0.796941 |
| 32               | 1                | 0              | 2.758704                | 3.698566  | -1.014527 |
| 33               | 6                | 0              | 1.708866                | 1.985317  | -0.191244 |
| 34               | 6                | 0              | 6.878495                | -2.770355 | -1.800154 |
| 35               | 1                | 0              | 7.151454                | -3.109049 | -2.796305 |
| 36               | 6                | 0              | 2.830606                | -1.534949 | 0.186713  |
| 37               | 6                | 0              | 1.679445                | 7.111566  | -0.007871 |
| 38               | 1                | 0              | 2.155492                | 7.878137  | 0.598514  |
| 39               | 6                | 0              | 0.954096                | 6.289622  | -2.151957 |

|    |   |   |           |           |           |
|----|---|---|-----------|-----------|-----------|
| 40 | 1 | 0 | 0.855486  | 6.412882  | -3.227420 |
| 41 | 6 | 0 | 7.877143  | -2.307570 | -0.931652 |
| 42 | 6 | 0 | 1.577320  | 7.293278  | -1.397036 |
| 43 | 6 | 0 | 7.495401  | -1.876165 | 0.349428  |
| 44 | 1 | 0 | 8.252874  | -1.514660 | 1.040755  |
| 45 | 6 | 0 | 9.326447  | -2.275810 | -1.351904 |
| 46 | 1 | 0 | 9.740410  | -1.262748 | -1.275858 |
| 47 | 1 | 0 | 9.450511  | -2.615592 | -2.384723 |
| 48 | 1 | 0 | 9.939744  | -2.919865 | -0.709050 |
| 49 | 6 | 0 | 2.138555  | 8.530192  | -2.054711 |
| 50 | 1 | 0 | 1.838380  | 9.438294  | -1.519077 |
| 51 | 1 | 0 | 1.802763  | 8.617785  | -3.092675 |
| 52 | 1 | 0 | 3.236509  | 8.509636  | -2.059725 |
| 53 | 1 | 0 | 3.840020  | -4.150536 | 1.554902  |
| 54 | 1 | 0 | -2.052977 | 4.024045  | 0.390004  |
| 55 | 6 | 0 | -1.125278 | 2.217068  | 3.231470  |
| 56 | 6 | 0 | 0.724391  | -4.365222 | 0.994056  |
| 57 | 6 | 0 | 1.229252  | -5.710771 | 1.562175  |
| 58 | 1 | 0 | 0.430665  | -6.459540 | 1.504032  |
| 59 | 1 | 0 | 2.087958  | -6.105267 | 1.007490  |
| 60 | 1 | 0 | 1.517820  | -5.617331 | 2.616846  |
| 61 | 6 | 0 | -0.548664 | -3.983054 | 1.770515  |
| 62 | 1 | 0 | -0.341808 | -3.934734 | 2.848037  |
| 63 | 1 | 0 | -0.954791 | -3.018188 | 1.459540  |
| 64 | 1 | 0 | -1.330634 | -4.736306 | 1.618146  |
| 65 | 6 | 0 | 0.423637  | -4.524945 | -0.506172 |
| 66 | 1 | 0 | 0.045134  | -3.596444 | -0.945023 |
| 67 | 1 | 0 | 1.316466  | -4.822768 | -1.069223 |
| 68 | 1 | 0 | -0.332735 | -5.302781 | -0.659890 |
| 69 | 6 | 0 | -1.099906 | 0.726292  | 3.622483  |
| 70 | 1 | 0 | -1.988809 | 0.193761  | 3.268418  |
| 71 | 1 | 0 | -0.210336 | 0.199142  | 3.233409  |
| 72 | 1 | 0 | -1.058200 | 0.627526  | 4.713989  |
| 73 | 6 | 0 | -2.295989 | 2.888466  | 3.979609  |
| 74 | 1 | 0 | -2.372955 | 3.957638  | 3.750890  |
| 75 | 1 | 0 | -3.254042 | 2.417567  | 3.726989  |
| 76 | 1 | 0 | -2.153777 | 2.795758  | 5.062270  |
| 77 | 6 | 0 | 0.201407  | 2.868533  | 3.662523  |
| 78 | 1 | 0 | 0.209070  | 3.949947  | 3.487786  |
| 79 | 1 | 0 | 0.358493  | 2.712001  | 4.736404  |
| 80 | 1 | 0 | 1.060029  | 2.429500  | 3.140729  |
| 81 | 8 | 0 | -0.318450 | -0.518913 | -1.144005 |
| 82 | 8 | 0 | -2.048456 | -1.156551 | 0.815759  |
| 83 | 6 | 0 | -1.460776 | -0.926459 | -1.454061 |

|     |   |   |           |           |           |
|-----|---|---|-----------|-----------|-----------|
| 84  | 6 | 0 | -2.496902 | -1.240894 | -0.370685 |
| 85  | 8 | 0 | -1.796666 | -1.115059 | -2.691430 |
| 86  | 6 | 0 | -0.801285 | -0.879410 | -3.740969 |
| 87  | 1 | 0 | -1.310577 | -1.149155 | -4.663691 |
| 88  | 1 | 0 | -0.519274 | 0.174636  | -3.738719 |
| 89  | 1 | 0 | 0.064923  | -1.519035 | -3.566059 |
| 90  | 6 | 0 | -3.362437 | -2.491664 | -0.672582 |
| 91  | 9 | 0 | -4.069396 | -2.410760 | -1.810610 |
| 92  | 9 | 0 | -4.211816 | -2.713268 | 0.341670  |
| 93  | 9 | 0 | -2.554170 | -3.569616 | -0.778022 |
| 94  | 6 | 0 | -8.276686 | -1.636715 | -0.405733 |
| 95  | 6 | 0 | -7.108041 | -1.146532 | 0.162773  |
| 96  | 6 | 0 | -6.152007 | -0.458709 | -0.625874 |
| 97  | 6 | 0 | -6.431371 | -0.272542 | -2.004035 |
| 98  | 6 | 0 | -7.612384 | -0.744791 | -2.560517 |
| 99  | 6 | 0 | -8.536251 | -1.432305 | -1.765401 |
| 100 | 1 | 0 | -8.988610 | -2.178239 | 0.209621  |
| 101 | 1 | 0 | -6.916635 | -1.337046 | 1.212021  |
| 102 | 1 | 0 | -5.740844 | 0.282957  | -2.628246 |
| 103 | 1 | 0 | -7.819124 | -0.574223 | -3.612621 |
| 104 | 1 | 0 | -9.457758 | -1.804665 | -2.203649 |
| 105 | 6 | 0 | -4.923979 | 0.051354  | -0.040037 |
| 106 | 6 | 0 | -4.805829 | 0.310307  | 1.424274  |
| 107 | 1 | 0 | -4.622498 | 1.381798  | 1.577986  |
| 108 | 1 | 0 | -5.684182 | 0.033619  | 2.005248  |
| 109 | 1 | 0 | -3.917130 | -0.211640 | 1.812000  |
| 110 | 6 | 0 | -3.762560 | 0.284033  | -0.812765 |
| 111 | 1 | 0 | -3.079725 | 1.039451  | -0.433268 |
| 112 | 1 | 0 | -3.837640 | 0.243007  | -1.894204 |

**TS2R<sub>exo</sub>**

Imaginary frequency= -142.18

Total energy= -2678.03379329

Sum of electronic and zero-point Energies= -2677.104056

Sum of electronic and thermal Energies= -2677.047165

Sum of electronic and thermal Enthalpies= -2677.046221

Sum of electronic and thermal Free Energies= -2677.197701

| Center<br>Number | Atomic<br>Number | Atomic<br>Type | Coordinates (Angstroms) |           |          |
|------------------|------------------|----------------|-------------------------|-----------|----------|
|                  |                  |                | X                       | Y         | Z        |
| 1                | 45               | 0              | 0.454309                | -0.385183 | 1.213781 |
| 2                | 6                | 0              | -1.917537               | 1.495027  | 2.515482 |

|    |   |   |           |           |           |
|----|---|---|-----------|-----------|-----------|
| 3  | 1 | 0 | -2.657715 | 0.688982  | 2.544334  |
| 4  | 7 | 0 | -1.563779 | 3.206494  | 0.895728  |
| 5  | 6 | 0 | -0.690256 | 2.205423  | 0.696101  |
| 6  | 6 | 0 | -1.725006 | 4.428349  | 0.165351  |
| 7  | 7 | 0 | -0.881858 | 1.166998  | 1.507548  |
| 8  | 6 | 0 | -2.550129 | 2.782409  | 1.917001  |
| 9  | 1 | 0 | -2.690655 | 3.578865  | 2.649524  |
| 10 | 7 | 0 | 2.330604  | -1.309256 | 0.746746  |
| 11 | 6 | 0 | 4.627130  | -1.960443 | 0.842255  |
| 12 | 1 | 0 | 5.173179  | -2.762768 | 0.343386  |
| 13 | 7 | 0 | 4.360301  | -0.874871 | -0.117765 |
| 14 | 6 | 0 | 3.205176  | -2.378176 | 1.323544  |
| 15 | 1 | 0 | 3.145724  | -2.301231 | 2.414561  |
| 16 | 6 | 0 | 6.191498  | 0.757874  | -0.187184 |
| 17 | 1 | 0 | 5.955864  | 1.049207  | 0.832578  |
| 18 | 6 | 0 | 2.434427  | 0.688559  | -0.591182 |
| 19 | 6 | 0 | 2.179550  | 2.776812  | -1.789281 |
| 20 | 1 | 0 | 2.557427  | 3.489642  | -2.515224 |
| 21 | 6 | 0 | 5.425703  | -0.226332 | -0.823588 |
| 22 | 6 | 0 | -1.410491 | 5.645589  | 0.781493  |
| 23 | 1 | 0 | -1.002446 | 5.650944  | 1.787922  |
| 24 | 6 | 0 | 5.731187  | -0.614681 | -2.130191 |
| 25 | 1 | 0 | 5.141594  | -1.388084 | -2.614053 |
| 26 | 6 | 0 | -2.256849 | 4.417042  | -1.127111 |
| 27 | 1 | 0 | -2.515935 | 3.473302  | -1.598208 |
| 28 | 6 | 0 | 1.208508  | 0.950833  | 0.018202  |
| 29 | 6 | 0 | 2.921016  | 1.621085  | -1.523473 |
| 30 | 1 | 0 | 3.858288  | 1.458473  | -2.041299 |
| 31 | 6 | 0 | 0.977933  | 3.052107  | -1.128294 |
| 32 | 1 | 0 | 0.451792  | 3.975503  | -1.338411 |
| 33 | 6 | 0 | 0.476081  | 2.125081  | -0.200778 |
| 34 | 6 | 0 | 6.788169  | 0.000148  | -2.804702 |
| 35 | 1 | 0 | 7.017863  | -0.302090 | -3.823180 |
| 36 | 6 | 0 | 3.065218  | -0.524263 | -0.035858 |
| 37 | 6 | 0 | -2.451889 | 5.621835  | -1.805253 |
| 38 | 1 | 0 | -2.860500 | 5.604933  | -2.812262 |
| 39 | 6 | 0 | -1.619424 | 6.840552  | 0.097004  |
| 40 | 1 | 0 | -1.370610 | 7.781448  | 0.581890  |
| 41 | 6 | 0 | 7.559080  | 0.996905  | -2.190656 |
| 42 | 6 | 0 | -2.141565 | 6.850787  | -1.207173 |
| 43 | 6 | 0 | 7.244722  | 1.361537  | -0.870763 |
| 44 | 1 | 0 | 7.831199  | 2.130390  | -0.373505 |
| 45 | 6 | 0 | 8.694208  | 1.669356  | -2.923591 |
| 46 | 1 | 0 | 8.486668  | 2.735545  | -3.081403 |

|    |   |   |           |           |           |
|----|---|---|-----------|-----------|-----------|
| 47 | 1 | 0 | 8.862548  | 1.212549  | -3.903691 |
| 48 | 1 | 0 | 9.629163  | 1.606763  | -2.353760 |
| 49 | 6 | 0 | -2.359543 | 8.153210  | -1.937953 |
| 50 | 1 | 0 | -2.803402 | 7.988522  | -2.924606 |
| 51 | 1 | 0 | -1.414277 | 8.692504  | -2.078538 |
| 52 | 1 | 0 | -3.024789 | 8.818403  | -1.373717 |
| 53 | 1 | 0 | 5.248788  | -1.578285 | 1.659479  |
| 54 | 1 | 0 | -3.511365 | 2.589880  | 1.427325  |
| 55 | 6 | 0 | -1.343996 | 1.652063  | 3.963821  |
| 56 | 6 | 0 | 2.836572  | -3.849763 | 0.955187  |
| 57 | 6 | 0 | 3.864069  | -4.780447 | 1.635343  |
| 58 | 1 | 0 | 3.584152  | -5.826580 | 1.466175  |
| 59 | 1 | 0 | 4.879610  | -4.650410 | 1.246300  |
| 60 | 1 | 0 | 3.893600  | -4.614780 | 2.719911  |
| 61 | 6 | 0 | 1.451651  | -4.196791 | 1.521648  |
| 62 | 1 | 0 | 1.390923  | -3.985948 | 2.596723  |
| 63 | 1 | 0 | 0.671322  | -3.629794 | 1.016420  |
| 64 | 1 | 0 | 1.236309  | -5.261598 | 1.373486  |
| 65 | 6 | 0 | 2.839066  | -4.083267 | -0.565888 |
| 66 | 1 | 0 | 2.099836  | -3.451249 | -1.069960 |
| 67 | 1 | 0 | 3.819850  | -3.888448 | -1.014966 |
| 68 | 1 | 0 | 2.584645  | -5.127165 | -0.784736 |
| 69 | 6 | 0 | -0.654803 | 0.345682  | 4.398219  |
| 70 | 1 | 0 | -1.328345 | -0.514351 | 4.319133  |
| 71 | 1 | 0 | 0.240930  | 0.127292  | 3.796712  |
| 72 | 1 | 0 | -0.326214 | 0.423982  | 5.441373  |
| 73 | 6 | 0 | -2.530293 | 1.906537  | 4.916112  |
| 74 | 1 | 0 | -3.053900 | 2.842712  | 4.689929  |
| 75 | 1 | 0 | -3.261556 | 1.089779  | 4.867643  |
| 76 | 1 | 0 | -2.174008 | 1.974072  | 5.950369  |
| 77 | 6 | 0 | -0.334882 | 2.809877  | 4.068410  |
| 78 | 1 | 0 | -0.785149 | 3.778691  | 3.824627  |
| 79 | 1 | 0 | 0.046369  | 2.879094  | 5.093977  |
| 80 | 1 | 0 | 0.527547  | 2.657091  | 3.408510  |
| 81 | 8 | 0 | -1.026483 | -2.047520 | 2.121653  |
| 82 | 8 | 0 | -0.480041 | -1.195626 | -0.366832 |
| 83 | 6 | 0 | -1.641940 | -2.567040 | 1.195431  |
| 84 | 6 | 0 | -1.425992 | -2.037573 | -0.211791 |
| 85 | 8 | 0 | -2.471267 | -3.575145 | 1.290358  |
| 86 | 6 | 0 | -2.663722 | -4.165631 | 2.610979  |
| 87 | 1 | 0 | -3.365093 | -4.982003 | 2.449496  |
| 88 | 1 | 0 | -1.709318 | -4.539130 | 2.985850  |
| 89 | 1 | 0 | -3.081754 | -3.419613 | 3.289543  |
| 90 | 6 | 0 | -1.613328 | -2.975782 | -1.419318 |



|     |   |   |           |           |           |
|-----|---|---|-----------|-----------|-----------|
| 91  | 9 | 0 | -0.619406 | -3.889779 | -1.388865 |
| 92  | 9 | 0 | -1.509259 | -2.290132 | -2.565632 |
| 93  | 9 | 0 | -2.775486 | -3.630035 | -1.407042 |
| 94  | 6 | 0 | -5.897060 | -2.507292 | -4.035979 |
| 95  | 6 | 0 | -4.879888 | -1.743377 | -3.474109 |
| 96  | 6 | 0 | -4.835960 | -1.511069 | -2.079257 |
| 97  | 6 | 0 | -5.866419 | -2.061710 | -1.278089 |
| 98  | 6 | 0 | -6.889911 | -2.809025 | -1.847506 |
| 99  | 6 | 0 | -6.906287 | -3.039680 | -3.227361 |
| 100 | 1 | 0 | -5.903060 | -2.690816 | -5.106196 |
| 101 | 1 | 0 | -4.097096 | -1.360462 | -4.118361 |
| 102 | 1 | 0 | -5.890191 | -1.861831 | -0.212356 |
| 103 | 1 | 0 | -7.681068 | -3.206245 | -1.218590 |
| 104 | 1 | 0 | -7.704728 | -3.627797 | -3.670722 |
| 105 | 6 | 0 | -3.771462 | -0.712290 | -1.472561 |
| 106 | 6 | 0 | -3.069048 | 0.340745  | -2.277121 |
| 107 | 1 | 0 | -2.889474 | 0.046267  | -3.313192 |
| 108 | 1 | 0 | -3.709723 | 1.234121  | -2.313625 |
| 109 | 1 | 0 | -2.118394 | 0.623417  | -1.819948 |
| 110 | 6 | 0 | -3.404701 | -0.878559 | -0.139995 |
| 111 | 1 | 0 | -2.837710 | -0.089815 | 0.343091  |
| 112 | 1 | 0 | -3.979302 | -1.531768 | 0.507259  |

**TS2S<sub>exo</sub>**

Imaginary frequency= -155.39

Total energy= -2678.03431640

Sum of electronic and zero-point Energies= -2677.105664

Sum of electronic and thermal Energies= -2677.048750

Sum of electronic and thermal Enthalpies= -2677.047806

Sum of electronic and thermal Free Energies= -2677.200280

| Center<br>Number | Atomic<br>Number | Atomic<br>Type | Coordinates (Angstroms) |           |           |
|------------------|------------------|----------------|-------------------------|-----------|-----------|
|                  |                  |                | X                       | Y         | Z         |
| 1                | 45               | 0              | 0.379472                | -0.023017 | 1.432233  |
| 2                | 6                | 0              | -2.160289               | 1.838766  | 2.386903  |
| 3                | 1                | 0              | -2.808038               | 0.969921  | 2.539156  |
| 4                | 7                | 0              | -1.929817               | 3.255417  | 0.483797  |
| 5                | 6                | 0              | -0.944935               | 2.339875  | 0.496333  |
| 6                | 6                | 0              | -2.254036               | 4.187574  | -0.554665 |
| 7                | 7                | 0              | -1.045187               | 1.465727  | 1.490451  |
| 8                | 6                | 0              | -2.906198               | 2.913684  | 1.545539  |
| 9                | 1                | 0              | -3.167721               | 3.808610  | 2.113170  |

|    |   |   |           |           |           |
|----|---|---|-----------|-----------|-----------|
| 10 | 7 | 0 | 2.268968  | -0.953612 | 1.038861  |
| 11 | 6 | 0 | 4.584183  | -1.562345 | 1.147623  |
| 12 | 1 | 0 | 5.041210  | -2.430956 | 0.667371  |
| 13 | 7 | 0 | 4.285800  | -0.538308 | 0.130986  |
| 14 | 6 | 0 | 3.191443  | -1.868843 | 1.778099  |
| 15 | 1 | 0 | 3.189166  | -1.558726 | 2.829918  |
| 16 | 6 | 0 | 5.985446  | 1.204109  | -0.170854 |
| 17 | 1 | 0 | 5.695642  | 1.637132  | 0.782438  |
| 18 | 6 | 0 | 2.296505  | 0.867506  | -0.533472 |
| 19 | 6 | 0 | 1.913682  | 2.723994  | -2.039405 |
| 20 | 1 | 0 | 2.247951  | 3.338642  | -2.869107 |
| 21 | 6 | 0 | 5.322409  | 0.070209  | -0.649028 |
| 22 | 6 | 0 | -2.110288 | 5.559291  | -0.326148 |
| 23 | 1 | 0 | -1.712699 | 5.909761  | 0.621661  |
| 24 | 6 | 0 | 5.696108  | -0.496498 | -1.872115 |
| 25 | 1 | 0 | 5.179938  | -1.380744 | -2.235402 |
| 26 | 6 | 0 | -2.763281 | 3.730755  | -1.775661 |
| 27 | 1 | 0 | -2.886152 | 2.664540  | -1.945403 |
| 28 | 6 | 0 | 1.061741  | 1.154933  | 0.043712  |
| 29 | 6 | 0 | 2.724526  | 1.669820  | -1.605755 |
| 30 | 1 | 0 | 3.668825  | 1.482771  | -2.103017 |
| 31 | 6 | 0 | 0.690050  | 3.018206  | -1.426591 |
| 32 | 1 | 0 | 0.102949  | 3.858423  | -1.778333 |
| 33 | 6 | 0 | 0.247021  | 2.218673  | -0.361674 |
| 34 | 6 | 0 | 6.719549  | 0.085930  | -2.618682 |
| 35 | 1 | 0 | 6.999953  | -0.353747 | -3.572582 |
| 36 | 6 | 0 | 2.977530  | -0.235995 | 0.171377  |
| 37 | 6 | 0 | -3.109112 | 4.649181  | -2.766222 |
| 38 | 1 | 0 | -3.496873 | 4.286987  | -3.715026 |
| 39 | 6 | 0 | -2.467418 | 6.467008  | -1.322984 |
| 40 | 1 | 0 | -2.347119 | 7.531852  | -1.140077 |
| 41 | 6 | 0 | 7.391968  | 1.230421  | -2.161305 |
| 42 | 6 | 0 | -2.972727 | 6.030402  | -2.557078 |
| 43 | 6 | 0 | 7.007631  | 1.777458  | -0.928181 |
| 44 | 1 | 0 | 7.512944  | 2.664917  | -0.555793 |
| 45 | 6 | 0 | 8.514528  | 1.837557  | -2.967140 |
| 46 | 1 | 0 | 8.690820  | 2.880913  | -2.686435 |
| 47 | 1 | 0 | 8.300685  | 1.801217  | -4.041115 |
| 48 | 1 | 0 | 9.453367  | 1.290555  | -2.806738 |
| 49 | 6 | 0 | -3.387487 | 7.018953  | -3.619498 |
| 50 | 1 | 0 | -3.245601 | 6.609251  | -4.625252 |
| 51 | 1 | 0 | -2.819523 | 7.952010  | -3.542906 |
| 52 | 1 | 0 | -4.451050 | 7.275465  | -3.520674 |
| 53 | 1 | 0 | 5.294575  | -1.160569 | 1.876398  |

|    |   |   |           |           |           |
|----|---|---|-----------|-----------|-----------|
| 54 | 1 | 0 | -3.815397 | 2.518205  | 1.079696  |
| 55 | 6 | 0 | -1.669073 | 2.308852  | 3.795382  |
| 56 | 6 | 0 | 2.817593  | -3.381410 | 1.754254  |
| 57 | 6 | 0 | 3.919710  | -4.159710 | 2.503895  |
| 58 | 1 | 0 | 3.651787  | -5.220968 | 2.563410  |
| 59 | 1 | 0 | 4.892847  | -4.096679 | 2.004646  |
| 60 | 1 | 0 | 4.040539  | -3.788667 | 3.529621  |
| 61 | 6 | 0 | 1.494698  | -3.595951 | 2.506739  |
| 62 | 1 | 0 | 1.562834  | -3.233932 | 3.540890  |
| 63 | 1 | 0 | 0.666591  | -3.072787 | 2.025227  |
| 64 | 1 | 0 | 1.246002  | -4.663649 | 2.542631  |
| 65 | 6 | 0 | 2.688373  | -3.907443 | 0.314891  |
| 66 | 1 | 0 | 1.907216  | -3.371337 | -0.234273 |
| 67 | 1 | 0 | 3.623411  | -3.805366 | -0.248704 |
| 68 | 1 | 0 | 2.428183  | -4.972599 | 0.322796  |
| 69 | 6 | 0 | -0.838544 | 1.187309  | 4.446421  |
| 70 | 1 | 0 | -1.410355 | 0.256647  | 4.530563  |
| 71 | 1 | 0 | 0.074551  | 0.968675  | 3.870621  |
| 72 | 1 | 0 | -0.524710 | 1.484889  | 5.454061  |
| 73 | 6 | 0 | -2.910032 | 2.568742  | 4.671940  |
| 74 | 1 | 0 | -3.537406 | 3.374801  | 4.274063  |
| 75 | 1 | 0 | -3.531546 | 1.668356  | 4.757292  |
| 76 | 1 | 0 | -2.604582 | 2.860607  | 5.683425  |
| 77 | 6 | 0 | -0.808812 | 3.582172  | 3.714192  |
| 78 | 1 | 0 | -1.363886 | 4.435503  | 3.309207  |
| 79 | 1 | 0 | -0.467643 | 3.864425  | 4.717173  |
| 80 | 1 | 0 | 0.083559  | 3.427147  | 3.095813  |
| 81 | 8 | 0 | -1.128731 | -1.567087 | 2.564974  |
| 82 | 8 | 0 | -0.723699 | -0.883659 | -0.015897 |
| 83 | 6 | 0 | -1.963689 | -1.926598 | 1.741639  |
| 84 | 6 | 0 | -1.753292 | -1.592831 | 0.269418  |
| 85 | 8 | 0 | -3.069401 | -2.579489 | 2.004087  |
| 86 | 6 | 0 | -3.337478 | -2.914088 | 3.398467  |
| 87 | 1 | 0 | -4.268579 | -3.476897 | 3.374683  |
| 88 | 1 | 0 | -2.521577 | -3.522034 | 3.793344  |
| 89 | 1 | 0 | -3.451936 | -1.997224 | 3.979068  |
| 90 | 6 | 0 | -2.993391 | -1.238574 | -0.575545 |
| 91 | 9 | 0 | -3.922330 | -2.194511 | -0.612991 |
| 92 | 9 | 0 | -2.632097 | -0.926278 | -1.826773 |
| 93 | 9 | 0 | -3.558640 | -0.137729 | -0.020364 |
| 94 | 6 | 0 | -3.829980 | -3.834143 | -4.605180 |
| 95 | 6 | 0 | -2.732984 | -3.452857 | -3.841790 |
| 96 | 6 | 0 | -2.486741 | -4.049283 | -2.581599 |
| 97 | 6 | 0 | -3.374277 | -5.058501 | -2.132289 |

|     |   |   |           |           |           |
|-----|---|---|-----------|-----------|-----------|
| 98  | 6 | 0 | -4.453616 | -5.453440 | -2.912688 |
| 99  | 6 | 0 | -4.689496 | -4.838530 | -4.147379 |
| 100 | 1 | 0 | -4.016277 | -3.349543 | -5.558887 |
| 101 | 1 | 0 | -2.089413 | -2.659417 | -4.204203 |
| 102 | 1 | 0 | -3.188464 | -5.565734 | -1.191550 |
| 103 | 1 | 0 | -5.110367 | -6.244417 | -2.563433 |
| 104 | 1 | 0 | -5.538189 | -5.144050 | -4.752700 |
| 105 | 6 | 0 | -1.349129 | -3.639251 | -1.764531 |
| 106 | 6 | 0 | -0.107333 | -3.093367 | -2.398794 |
| 107 | 1 | 0 | 0.696795  | -3.830923 | -2.269604 |
| 108 | 1 | 0 | -0.208057 | -2.897416 | -3.466040 |
| 109 | 1 | 0 | 0.225361  | -2.180776 | -1.888389 |
| 110 | 6 | 0 | -1.373331 | -3.747397 | -0.368431 |
| 111 | 1 | 0 | -0.424467 | -3.751266 | 0.162195  |
| 112 | 1 | 0 | -2.198733 | -4.257955 | 0.118921  |

---

**M2R<sub>endo</sub>**

Total energy= -2678.03991725

Sum of electronic and zero-point Energies= -2677.108466

Sum of electronic and thermal Energies= -2677.052225

Sum of electronic and thermal Enthalpies= -2677.051281

Sum of electronic and thermal Free Energies= -2677.200522

---

| Center<br>Number | Atomic<br>Number | Atomic<br>Type | Coordinates (Angstroms) |           |           |
|------------------|------------------|----------------|-------------------------|-----------|-----------|
|                  |                  |                | X                       | Y         | Z         |
| 1                | 45               | 0              | 0.113526                | -0.205940 | 0.696998  |
| 2                | 6                | 0              | -0.763822               | 2.892884  | 1.386352  |
| 3                | 1                | 0              | -1.800464               | 2.745512  | 1.082325  |
| 4                | 7                | 0              | 1.116949                | 3.782610  | 0.239631  |
| 5                | 6                | 0              | 1.155978                | 2.437854  | 0.206569  |
| 6                | 6                | 0              | 2.093907                | 4.722666  | -0.221803 |
| 7                | 7                | 0              | 0.081773                | 1.867028  | 0.738802  |
| 8                | 6                | 0              | -0.202051               | 4.202988  | 0.769855  |
| 9                | 1                | 0              | -0.069240               | 5.007825  | 1.494912  |
| 10               | 7                | 0              | 0.973806                | -2.187599 | 0.649746  |
| 11               | 6                | 0              | 1.988889                | -4.327436 | 0.900364  |
| 12               | 1                | 0              | 1.750247                | -5.023781 | 0.088007  |
| 13               | 7                | 0              | 2.917463                | -3.299161 | 0.403798  |
| 14               | 6                | 0              | 0.767547                | -3.490032 | 1.357578  |
| 15               | 1                | 0              | 0.867075                | -3.285185 | 2.433353  |
| 16               | 6                | 0              | 5.298775                | -3.514233 | 0.911865  |
| 17               | 1                | 0              | 5.102160                | -3.129518 | 1.907906  |

|    |   |   |           |           |           |
|----|---|---|-----------|-----------|-----------|
| 18 | 6 | 0 | 2.774246  | -0.863090 | -0.250569 |
| 19 | 6 | 0 | 4.297480  | 0.752452  | -1.215898 |
| 20 | 1 | 0 | 5.234218  | 0.968747  | -1.719662 |
| 21 | 6 | 0 | 4.249488  | -3.634489 | -0.002145 |
| 22 | 6 | 0 | 1.911166  | 5.366542  | -1.451235 |
| 23 | 1 | 0 | 1.045271  | 5.126211  | -2.062009 |
| 24 | 6 | 0 | 4.492726  | -4.140851 | -1.284979 |
| 25 | 1 | 0 | 3.672661  | -4.239797 | -1.990909 |
| 26 | 6 | 0 | 3.205060  | 5.030755  | 0.567824  |
| 27 | 1 | 0 | 3.341277  | 4.538921  | 1.526315  |
| 28 | 6 | 0 | 1.911358  | 0.193094  | 0.041246  |
| 29 | 6 | 0 | 3.990770  | -0.573332 | -0.893545 |
| 30 | 1 | 0 | 4.690735  | -1.359331 | -1.151525 |
| 31 | 6 | 0 | 3.432904  | 1.807344  | -0.901615 |
| 32 | 1 | 0 | 3.712002  | 2.822964  | -1.157373 |
| 33 | 6 | 0 | 2.217263  | 1.528369  | -0.259446 |
| 34 | 6 | 0 | 5.787918  | -4.508358 | -1.647953 |
| 35 | 1 | 0 | 5.971336  | -4.897590 | -2.646243 |
| 36 | 6 | 0 | 2.236430  | -2.148690 | 0.231027  |
| 37 | 6 | 0 | 4.137715  | 5.966314  | 0.115529  |
| 38 | 1 | 0 | 5.003818  | 6.194293  | 0.731740  |
| 39 | 6 | 0 | 2.845716  | 6.303486  | -1.887809 |
| 40 | 1 | 0 | 2.698848  | 6.795334  | -2.846682 |
| 41 | 6 | 0 | 6.857599  | -4.388676 | -0.744894 |
| 42 | 6 | 0 | 3.975037  | 6.619452  | -1.114528 |
| 43 | 6 | 0 | 6.590555  | -3.886540 | 0.536206  |
| 44 | 1 | 0 | 7.403130  | -3.786132 | 1.251180  |
| 45 | 6 | 0 | 8.252549  | -4.804965 | -1.144301 |
| 46 | 1 | 0 | 8.568501  | -4.308335 | -2.069813 |
| 47 | 1 | 0 | 8.305368  | -5.885637 | -1.328284 |
| 48 | 1 | 0 | 8.978924  | -4.562613 | -0.363675 |
| 49 | 6 | 0 | 4.971970  | 7.647971  | -1.589694 |
| 50 | 1 | 0 | 5.896766  | 7.608789  | -1.005911 |
| 51 | 1 | 0 | 4.564005  | 8.663384  | -1.498576 |
| 52 | 1 | 0 | 5.226692  | 7.498904  | -2.645604 |
| 53 | 1 | 0 | 2.445003  | -4.887975 | 1.718754  |
| 54 | 1 | 0 | -0.824927 | 4.572693  | -0.053505 |
| 55 | 6 | 0 | -0.721512 | 2.820534  | 2.949496  |
| 56 | 6 | 0 | -0.596263 | -4.204084 | 1.156030  |
| 57 | 6 | 0 | -0.491063 | -5.622665 | 1.759041  |
| 58 | 1 | 0 | -1.469086 | -6.116278 | 1.718839  |
| 59 | 1 | 0 | 0.217929  | -6.257871 | 1.215261  |
| 60 | 1 | 0 | -0.180716 | -5.587782 | 2.811061  |
| 61 | 6 | 0 | -1.690180 | -3.447736 | 1.931784  |

|     |   |   |           |           |           |
|-----|---|---|-----------|-----------|-----------|
| 62  | 1 | 0 | -1.452780 | -3.413488 | 3.003689  |
| 63  | 1 | 0 | -1.816331 | -2.420557 | 1.578874  |
| 64  | 1 | 0 | -2.650962 | -3.965750 | 1.826788  |
| 65  | 6 | 0 | -0.970988 | -4.305851 | -0.332469 |
| 66  | 1 | 0 | -1.070808 | -3.314726 | -0.789477 |
| 67  | 1 | 0 | -0.222959 | -4.861908 | -0.909680 |
| 68  | 1 | 0 | -1.925288 | -4.832828 | -0.446202 |
| 69  | 6 | 0 | -1.128358 | 1.410362  | 3.414159  |
| 70  | 1 | 0 | -2.088257 | 1.103967  | 2.987980  |
| 71  | 1 | 0 | -0.378527 | 0.655483  | 3.130045  |
| 72  | 1 | 0 | -1.206453 | 1.383407  | 4.507875  |
| 73  | 6 | 0 | -1.753261 | 3.830448  | 3.491171  |
| 74  | 1 | 0 | -1.519010 | 4.858986  | 3.192193  |
| 75  | 1 | 0 | -2.764076 | 3.597111  | 3.133699  |
| 76  | 1 | 0 | -1.771026 | 3.803530  | 4.586975  |
| 77  | 6 | 0 | 0.671073  | 3.147073  | 3.519268  |
| 78  | 1 | 0 | 0.993637  | 4.165813  | 3.277351  |
| 79  | 1 | 0 | 0.653089  | 3.065639  | 4.612709  |
| 80  | 1 | 0 | 1.432102  | 2.447625  | 3.153580  |
| 81  | 8 | 0 | -0.409429 | -0.436191 | -1.231743 |
| 82  | 8 | 0 | -2.203107 | -0.286653 | 0.741017  |
| 83  | 6 | 0 | -1.617783 | -0.526977 | -1.544596 |
| 84  | 6 | 0 | -2.730062 | -0.329208 | -0.480775 |
| 85  | 8 | 0 | -1.973687 | -0.756238 | -2.771398 |
| 86  | 6 | 0 | -0.937946 | -0.895000 | -3.797946 |
| 87  | 1 | 0 | -1.488907 | -1.068374 | -4.720118 |
| 88  | 1 | 0 | -0.359656 | 0.028927  | -3.853049 |
| 89  | 1 | 0 | -0.299138 | -1.744565 | -3.554936 |
| 90  | 6 | 0 | -3.428029 | 1.022982  | -0.857115 |
| 91  | 9 | 0 | -2.507651 | 1.995095  | -1.067336 |
| 92  | 9 | 0 | -4.230235 | 1.425036  | 0.143275  |
| 93  | 9 | 0 | -4.173448 | 0.946630  | -1.980034 |
| 94  | 6 | 0 | -8.656074 | -0.410882 | -0.234209 |
| 95  | 6 | 0 | -7.425574 | -0.700744 | 0.330063  |
| 96  | 6 | 0 | -6.311737 | -1.064834 | -0.485910 |
| 97  | 6 | 0 | -6.518398 | -1.138132 | -1.897758 |
| 98  | 6 | 0 | -7.756673 | -0.859662 | -2.450156 |
| 99  | 6 | 0 | -8.826181 | -0.490952 | -1.623244 |
| 100 | 1 | 0 | -9.486861 | -0.121849 | 0.400316  |
| 101 | 1 | 0 | -7.314470 | -0.620894 | 1.403153  |
| 102 | 1 | 0 | -5.717947 | -1.446218 | -2.557375 |
| 103 | 1 | 0 | -7.899409 | -0.933325 | -3.522922 |
| 104 | 1 | 0 | -9.795421 | -0.270032 | -2.061561 |
| 105 | 6 | 0 | -5.041282 | -1.360810 | 0.098207  |

|     |   |   |           |           |           |
|-----|---|---|-----------|-----------|-----------|
| 106 | 6 | 0 | -4.833982 | -1.513187 | 1.552753  |
| 107 | 1 | 0 | -3.919889 | -0.958724 | 1.822327  |
| 108 | 1 | 0 | -5.673214 | -1.231515 | 2.184888  |
| 109 | 1 | 0 | -4.583312 | -2.566653 | 1.751662  |
| 110 | 6 | 0 | -3.813309 | -1.529981 | -0.710825 |
| 111 | 1 | 0 | -3.268238 | -2.411278 | -0.362777 |
| 112 | 1 | 0 | -4.001774 | -1.617644 | -1.776605 |

---

### M2S<sub>endo</sub>

Total energy= -2678.03603749

Sum of electronic and zero-point Energies= -2677.104920

Sum of electronic and thermal Energies= -2677.048521

Sum of electronic and thermal Enthalpies= -2677.047577

Sum of electronic and thermal Free Energies= -2677.197388

---

| Center<br>Number | Atomic<br>Number | Atomic<br>Type | Coordinates (Angstroms) |           |           |
|------------------|------------------|----------------|-------------------------|-----------|-----------|
|                  |                  |                | X                       | Y         | Z         |
| 1                | 45               | 0              | 0.178389                | -0.301468 | 0.659362  |
| 2                | 6                | 0              | -1.450242               | 2.376713  | 1.619371  |
| 3                | 1                | 0              | -2.448216               | 1.981376  | 1.418927  |
| 4                | 7                | 0              | 0.030323                | 3.825131  | 0.469099  |
| 5                | 6                | 0              | 0.418223                | 2.545231  | 0.304943  |
| 6                | 6                | 0              | 0.581111                | 4.997814  | -0.139732 |
| 7                | 7                | 0              | -0.456318               | 1.663847  | 0.784894  |
| 8                | 6                | 0              | -1.320352               | 3.824517  | 1.078964  |
| 9                | 1                | 0              | -1.383309               | 4.592360  | 1.851776  |
| 10               | 7                | 0              | 1.589153                | -1.942624 | 0.593282  |
| 11               | 6                | 0              | 3.211712                | -3.655339 | 0.970247  |
| 12               | 1                | 0              | 3.282185                | -4.414238 | 0.182800  |
| 13               | 7                | 0              | 3.796588                | -2.397167 | 0.479382  |
| 14               | 6                | 0              | 1.748841                | -3.258504 | 1.296840  |
| 15               | 1                | 0              | 1.670667                | -3.049075 | 2.373398  |
| 16               | 6                | 0              | 6.190309                | -2.178566 | 0.926558  |
| 17               | 1                | 0              | 5.958632                | -2.015472 | 1.975223  |
| 18               | 6                | 0              | 2.952871                | -0.109148 | -0.173065 |
| 19               | 6                | 0              | 3.978818                | 1.931832  | -0.978703 |
| 20               | 1                | 0              | 4.838761                | 2.441032  | -1.402369 |
| 21               | 6                | 0              | 5.149879                | -2.363998 | 0.009443  |
| 22               | 6                | 0              | 0.509555                | 5.176772  | -1.524647 |
| 23               | 1                | 0              | 0.053583                | 4.411282  | -2.146649 |
| 24               | 6                | 0              | 5.440728                | -2.585854 | -1.340127 |
| 25               | 1                | 0              | 4.633623                | -2.746939 | -2.049222 |

|    |   |   |            |            |            |
|----|---|---|------------|------------|------------|
| 26 | 6 | 0 | 1. 150601  | 5. 992098  | 0. 664491  |
| 27 | 1 | 0 | 1. 202526  | 5. 849828  | 1. 739896  |
| 28 | 6 | 0 | 1. 799937  | 0. 629927  | 0. 092280  |
| 29 | 6 | 0 | 4. 063466  | 0. 560729  | -0. 715234 |
| 30 | 1 | 0 | 4. 983054  | 0. 034977  | -0. 939775 |
| 31 | 6 | 0 | 2. 818604  | 2. 664481  | -0. 708575 |
| 32 | 1 | 0 | 2. 795165  | 3. 727167  | -0. 919374 |
| 33 | 6 | 0 | 1. 705061  | 2. 005681  | -0. 164581 |
| 34 | 6 | 0 | 6. 769577  | -2. 596220 | -1. 768860 |
| 35 | 1 | 0 | 6. 988243  | -2. 762851 | -2. 820545 |
| 36 | 6 | 0 | 2. 801014  | -1. 515079 | 0. 250076  |
| 37 | 6 | 0 | 1. 656630  | 7. 149665  | 0. 078015  |
| 38 | 1 | 0 | 2. 102368  | 7. 914646  | 0. 709092  |
| 39 | 6 | 0 | 1. 027896  | 6. 338433  | -2. 100177 |
| 40 | 1 | 0 | 0. 974203  | 6. 468441  | -3. 178028 |
| 41 | 6 | 0 | 7. 825443  | -2. 406396 | -0. 866278 |
| 42 | 6 | 0 | 1. 608223  | 7. 342479  | -1. 312758 |
| 43 | 6 | 0 | 7. 512285  | -2. 200614 | 0. 487348  |
| 44 | 1 | 0 | 8. 314915  | -2. 053627 | 1. 206034  |
| 45 | 6 | 0 | 9. 262128  | -2. 420357 | -1. 328752 |
| 46 | 1 | 0 | 9. 742998  | -1. 448138 | -1. 161065 |
| 47 | 1 | 0 | 9. 335778  | -2. 651450 | -2. 395912 |
| 48 | 1 | 0 | 9. 849758  | -3. 166057 | -0. 779369 |
| 49 | 6 | 0 | 2. 167155  | 8. 599590  | -1. 933184 |
| 50 | 1 | 0 | 1. 680416  | 9. 493763  | -1. 524445 |
| 51 | 1 | 0 | 2. 028166  | 8. 605418  | -3. 018582 |
| 52 | 1 | 0 | 3. 240651  | 8. 699094  | -1. 728862 |
| 53 | 1 | 0 | 3. 757569  | -4. 012772 | 1. 845823  |
| 54 | 1 | 0 | -2. 065281 | 4. 043581  | 0. 303801  |
| 55 | 6 | 0 | -1. 183274 | 2. 217767  | 3. 157426  |
| 56 | 6 | 0 | 0. 719804  | -4. 377095 | 0. 972748  |
| 57 | 6 | 0 | 1. 210230  | -5. 688278 | 1. 627260  |
| 58 | 1 | 0 | 0. 444760  | -6. 465116 | 1. 514856  |
| 59 | 1 | 0 | 2. 130713  | -6. 070067 | 1. 171200  |
| 60 | 1 | 0 | 1. 390511  | -5. 556364 | 2. 701867  |
| 61 | 6 | 0 | -0. 638131 | -4. 027737 | 1. 608737  |
| 62 | 1 | 0 | -0. 542159 | -3. 970806 | 2. 701849  |
| 63 | 1 | 0 | -1. 041488 | -3. 077298 | 1. 253924  |
| 64 | 1 | 0 | -1. 373577 | -4. 810123 | 1. 384945  |
| 65 | 6 | 0 | 0. 585283  | -4. 584569 | -0. 545481 |
| 66 | 1 | 0 | 0. 267538  | -3. 667951 | -1. 050028 |
| 67 | 1 | 0 | 1. 532682  | -4. 904252 | -0. 995975 |
| 68 | 1 | 0 | -0. 155882 | -5. 363545 | -0. 757900 |
| 69 | 6 | 0 | -1. 141759 | 0. 725788  | 3. 539490  |



|     |   |   |           |           |           |
|-----|---|---|-----------|-----------|-----------|
| 70  | 1 | 0 | -2.037072 | 0.188449  | 3.212763  |
| 71  | 1 | 0 | -0.264956 | 0.205579  | 3.115614  |
| 72  | 1 | 0 | -1.061942 | 0.622401  | 4.628462  |
| 73  | 6 | 0 | -2.360132 | 2.874149  | 3.909239  |
| 74  | 1 | 0 | -2.438360 | 3.946646  | 3.697114  |
| 75  | 1 | 0 | -3.315937 | 2.405735  | 3.643034  |
| 76  | 1 | 0 | -2.224887 | 2.764229  | 4.991204  |
| 77  | 6 | 0 | 0.137268  | 2.875216  | 3.599633  |
| 78  | 1 | 0 | 0.141427  | 3.956877  | 3.427664  |
| 79  | 1 | 0 | 0.285759  | 2.716171  | 4.674383  |
| 80  | 1 | 0 | 1.002074  | 2.440720  | 3.084560  |
| 81  | 8 | 0 | -0.298562 | -0.414938 | -1.289178 |
| 82  | 8 | 0 | -1.947033 | -1.164858 | 0.660531  |
| 83  | 6 | 0 | -1.465571 | -0.728931 | -1.616570 |
| 84  | 6 | 0 | -2.516984 | -1.103390 | -0.542322 |
| 85  | 8 | 0 | -1.822059 | -0.771526 | -2.862752 |
| 86  | 6 | 0 | -0.823731 | -0.491503 | -3.898464 |
| 87  | 1 | 0 | -1.362632 | -0.609609 | -4.836190 |
| 88  | 1 | 0 | -0.454815 | 0.528654  | -3.781738 |
| 89  | 1 | 0 | -0.011635 | -1.215825 | -3.817938 |
| 90  | 6 | 0 | -3.135308 | -2.483962 | -0.936123 |
| 91  | 9 | 0 | -3.902178 | -2.437441 | -2.046646 |
| 92  | 9 | 0 | -3.906191 | -2.935816 | 0.069547  |
| 93  | 9 | 0 | -2.169156 | -3.396180 | -1.161735 |
| 94  | 6 | 0 | -8.477922 | -1.338910 | -0.114617 |
| 95  | 6 | 0 | -7.249941 | -0.989368 | 0.419111  |
| 96  | 6 | 0 | -6.153014 | -0.640855 | -0.426735 |
| 97  | 6 | 0 | -6.372464 | -0.659293 | -1.838462 |
| 98  | 6 | 0 | -7.605177 | -1.007849 | -2.361165 |
| 99  | 6 | 0 | -8.660074 | -1.349017 | -1.503855 |
| 100 | 1 | 0 | -9.298058 | -1.605157 | 0.544076  |
| 101 | 1 | 0 | -7.132133 | -0.994304 | 1.494502  |
| 102 | 1 | 0 | -5.579913 | -0.391459 | -2.524156 |
| 103 | 1 | 0 | -7.755474 | -1.011997 | -3.435709 |
| 104 | 1 | 0 | -9.626240 | -1.620156 | -1.919514 |
| 105 | 6 | 0 | -4.892341 | -0.267782 | 0.130933  |
| 106 | 6 | 0 | -4.645854 | -0.153127 | 1.584569  |
| 107 | 1 | 0 | -4.468977 | 0.906407  | 1.820743  |
| 108 | 1 | 0 | -5.432805 | -0.529381 | 2.233864  |
| 109 | 1 | 0 | -3.685497 | -0.654724 | 1.793439  |
| 110 | 6 | 0 | -3.700031 | 0.028529  | -0.694730 |
| 111 | 1 | 0 | -3.217344 | 0.929091  | -0.307643 |
| 112 | 1 | 0 | -3.919043 | 0.168070  | -1.750161 |

---

**M2R<sub>exo</sub>**

Total energy= -2678.05731128

Sum of electronic and zero-point Energies= -2677.126362

Sum of electronic and thermal Energies= -2677.069798

Sum of electronic and thermal Enthalpies= -2677.068854

Sum of electronic and thermal Free Energies= -2677.219134

---

| Center<br>Number | Atomic<br>Number | Atomic<br>Type | Coordinates (Angstroms) |           |           |
|------------------|------------------|----------------|-------------------------|-----------|-----------|
|                  |                  |                | X                       | Y         | Z         |
| 1                | 45               | 0              | -0.469230               | -0.408113 | -1.290063 |
| 2                | 6                | 0              | 2.364001                | 0.888426  | -2.451582 |
| 3                | 1                | 0              | 2.904630                | -0.061703 | -2.393393 |
| 4                | 7                | 0              | 2.221796                | 2.723860  | -0.951349 |
| 5                | 6                | 0              | 1.135336                | 1.938262  | -0.816643 |
| 6                | 6                | 0              | 2.500651                | 3.995306  | -0.353400 |
| 7                | 7                | 0              | 1.185536                | 0.831739  | -1.551328 |
| 8                | 6                | 0              | 3.205811                | 2.024615  | -1.808133 |
| 9                | 1                | 0              | 3.624358                | 2.722791  | -2.534387 |
| 10               | 7                | 0              | -2.487852               | -0.991590 | -0.770213 |
| 11               | 6                | 0              | -4.858895               | -1.344809 | -0.718348 |
| 12               | 1                | 0              | -5.283578               | -2.052877 | -0.000236 |
| 13               | 7                | 0              | -4.427803               | -0.132236 | -0.004808 |
| 14               | 6                | 0              | -3.545858               | -1.860883 | -1.374666 |
| 15               | 1                | 0              | -3.567171               | -1.634519 | -2.449587 |
| 16               | 6                | 0              | -6.104032               | 1.632128  | 0.258756  |
| 17               | 1                | 0              | -5.974848               | 1.887528  | -0.789311 |
| 18               | 6                | 0              | -2.263751               | 1.101009  | 0.399151  |
| 19               | 6                | 0              | -1.669792               | 3.185546  | 1.480103  |
| 20               | 1                | 0              | -1.931571               | 3.998689  | 2.149785  |
| 21               | 6                | 0              | -5.341426               | 0.602887  | 0.818088  |
| 22               | 6                | 0              | 1.962350                | 5.165853  | -0.901888 |
| 23               | 1                | 0              | 1.308068                | 5.105423  | -1.766400 |
| 24               | 6                | 0              | -5.515921               | 0.256285  | 2.162950  |
| 25               | 1                | 0              | -4.934097               | -0.555717 | 2.590309  |
| 26               | 6                | 0              | 3.358795                | 4.073952  | 0.747117  |
| 27               | 1                | 0              | 3.787098                | 3.167562  | 1.165783  |
| 28               | 6                | 0              | -1.003493               | 1.104493  | -0.202664 |
| 29               | 6                | 0              | -2.598220               | 2.163660  | 1.255310  |
| 30               | 1                | 0              | -3.560500               | 2.204103  | 1.750108  |
| 31               | 6                | 0              | -0.419823               | 3.194729  | 0.853096  |
| 32               | 1                | 0              | 0.265741                | 4.013161  | 1.038035  |
| 33               | 6                | 0              | -0.078485               | 2.141975  | -0.010212 |

---

|    |   |   |           |           |           |
|----|---|---|-----------|-----------|-----------|
| 34 | 6 | 0 | -6.433396 | 0.957731  | 2.944417  |
| 35 | 1 | 0 | -6.560916 | 0.685284  | 3.989296  |
| 36 | 6 | 0 | -3.084202 | -0.032129 | -0.072760 |
| 37 | 6 | 0 | 3.662976  | 5.318068  | 1.302586  |
| 38 | 1 | 0 | 4.330277  | 5.370002  | 2.159035  |
| 39 | 6 | 0 | 2.267728  | 6.400660  | -0.333142 |
| 40 | 1 | 0 | 1.841176  | 7.303568  | -0.763345 |
| 41 | 6 | 0 | -7.196302 | 2.005736  | 2.405398  |
| 42 | 6 | 0 | 3.123494  | 6.499876  | 0.776155  |
| 43 | 6 | 0 | -7.020088 | 2.325228  | 1.050876  |
| 44 | 1 | 0 | -7.606644 | 3.127110  | 0.609528  |
| 45 | 6 | 0 | -8.162158 | 2.780855  | 3.268229  |
| 46 | 1 | 0 | -7.645247 | 3.581798  | 3.814297  |
| 47 | 1 | 0 | -8.637882 | 2.136082  | 4.015061  |
| 48 | 1 | 0 | -8.948139 | 3.249711  | 2.667334  |
| 49 | 6 | 0 | 3.447940  | 7.845481  | 1.377872  |
| 50 | 1 | 0 | 4.175352  | 7.755543  | 2.190593  |
| 51 | 1 | 0 | 2.548033  | 8.326116  | 1.782278  |
| 52 | 1 | 0 | 3.862602  | 8.527367  | 0.625336  |
| 53 | 1 | 0 | -5.629877 | -1.096873 | -1.452233 |
| 54 | 1 | 0 | 4.024127  | 1.639309  | -1.188604 |
| 55 | 6 | 0 | 1.996419  | 1.126029  | -3.956784 |
| 56 | 6 | 0 | -3.365169 | -3.401873 | -1.243417 |
| 57 | 6 | 0 | -4.615501 | -4.073658 | -1.852367 |
| 58 | 1 | 0 | -4.492267 | -5.162924 | -1.849176 |
| 59 | 1 | 0 | -5.528460 | -3.847607 | -1.289894 |
| 60 | 1 | 0 | -4.771322 | -3.759812 | -2.892539 |
| 61 | 6 | 0 | -2.143212 | -3.858489 | -2.056646 |
| 62 | 1 | 0 | -2.220933 | -3.538899 | -3.104336 |
| 63 | 1 | 0 | -1.214621 | -3.460055 | -1.649721 |
| 64 | 1 | 0 | -2.070676 | -4.953026 | -2.048128 |
| 65 | 6 | 0 | -3.206381 | -3.837743 | 0.223963  |
| 66 | 1 | 0 | -2.351451 | -3.346267 | 0.696787  |
| 67 | 1 | 0 | -4.099125 | -3.616355 | 0.820984  |
| 68 | 1 | 0 | -3.043220 | -4.920849 | 0.277078  |
| 69 | 6 | 0 | 1.064070  | 0.006365  | -4.452440 |
| 70 | 1 | 0 | 1.525469  | -0.981266 | -4.350772 |
| 71 | 1 | 0 | 0.117845  | -0.009524 | -3.895047 |
| 72 | 1 | 0 | 0.822317  | 0.159949  | -5.510877 |
| 73 | 6 | 0 | 3.300487  | 1.070925  | -4.779343 |
| 74 | 1 | 0 | 3.996855  | 1.873764  | -4.510912 |
| 75 | 1 | 0 | 3.818945  | 0.113432  | -4.641959 |
| 76 | 1 | 0 | 3.076081  | 1.177943  | -5.846941 |
| 77 | 6 | 0 | 1.303618  | 2.483177  | -4.177979 |

|     |   |   |          |           |           |
|-----|---|---|----------|-----------|-----------|
| 78  | 1 | 0 | 1.941527 | 3.327890  | -3.894248 |
| 79  | 1 | 0 | 1.059659 | 2.605841  | -5.239807 |
| 80  | 1 | 0 | 0.364574 | 2.554937  | -3.616517 |
| 81  | 8 | 0 | 0.737163 | -2.236779 | -2.154257 |
| 82  | 8 | 0 | 0.266499 | -1.305998 | 0.331924  |
| 83  | 6 | 0 | 1.511570 | -2.611711 | -1.280239 |
| 84  | 6 | 0 | 1.354099 | -2.134100 | 0.188185  |
| 85  | 8 | 0 | 2.509764 | -3.442839 | -1.476460 |
| 86  | 6 | 0 | 2.677343 | -3.991887 | -2.816918 |
| 87  | 1 | 0 | 3.507121 | -4.691345 | -2.730697 |
| 88  | 1 | 0 | 1.764380 | -4.506758 | -3.120499 |
| 89  | 1 | 0 | 2.916563 | -3.188685 | -3.516071 |
| 90  | 6 | 0 | 1.060422 | -3.390906 | 1.059917  |
| 91  | 9 | 0 | 0.039940 | -4.100574 | 0.543695  |
| 92  | 9 | 0 | 0.721644 | -3.020505 | 2.309247  |
| 93  | 9 | 0 | 2.120535 | -4.216234 | 1.155397  |
| 94  | 6 | 0 | 5.058647 | -2.059276 | 5.028630  |
| 95  | 6 | 0 | 4.077955 | -1.462500 | 4.259026  |
| 96  | 6 | 0 | 3.865952 | -1.862516 | 2.900807  |
| 97  | 6 | 0 | 4.698100 | -2.900496 | 2.372965  |
| 98  | 6 | 0 | 5.664768 | -3.500190 | 3.158332  |
| 99  | 6 | 0 | 5.849774 | -3.081245 | 4.483716  |
| 100 | 1 | 0 | 5.213642 | -1.739979 | 6.053869  |
| 101 | 1 | 0 | 3.482059 | -0.670633 | 4.694529  |
| 102 | 1 | 0 | 4.570021 | -3.246725 | 1.356454  |
| 103 | 1 | 0 | 6.280957 | -4.293292 | 2.748103  |
| 104 | 1 | 0 | 6.614496 | -3.552685 | 5.094194  |
| 105 | 6 | 0 | 2.870797 | -1.223822 | 2.112350  |
| 106 | 6 | 0 | 1.937777 | -0.216033 | 2.676355  |
| 107 | 1 | 0 | 1.745318 | -0.332085 | 3.742074  |
| 108 | 1 | 0 | 2.376884 | 0.781597  | 2.514660  |
| 109 | 1 | 0 | 0.997209 | -0.229770 | 2.116749  |
| 110 | 6 | 0 | 2.731844 | -1.469990 | 0.645883  |
| 111 | 1 | 0 | 2.716228 | -0.490628 | 0.153831  |
| 112 | 1 | 0 | 3.560322 | -2.042227 | 0.237580  |

---

**M2S<sub>exo</sub>**

Total energy= -2678.06049848

Sum of electronic and zero-point Energies= -2677.128914

Sum of electronic and thermal Energies= -2677.072454

Sum of electronic and thermal Enthalpies= -2677.071510

Sum of electronic and thermal Free Energies= -2677.220386

---

| Center<br>Number | Atomic<br>Number | Atomic<br>Type | Coordinates (Angstroms) |           |           |
|------------------|------------------|----------------|-------------------------|-----------|-----------|
|                  |                  |                | X                       | Y         | Z         |
| 1                | 45               | 0              | 0.313985                | -0.023787 | -1.478776 |
| 2                | 6                | 0              | -2.545357               | -1.356502 | -2.419526 |
| 3                | 1                | 0              | -3.008181               | -0.378977 | -2.582129 |
| 4                | 7                | 0              | -2.593322               | -2.788231 | -0.513890 |
| 5                | 6                | 0              | -1.445765               | -2.077463 | -0.535363 |
| 6                | 6                | 0              | -3.121251               | -3.544398 | 0.581264  |
| 7                | 7                | 0              | -1.381087               | -1.198293 | -1.523880 |
| 8                | 6                | 0              | -3.485433               | -2.265297 | -1.576534 |
| 9                | 1                | 0              | -3.912489               | -3.093801 | -2.144818 |
| 10               | 7                | 0              | 2.394875                | 0.468852  | -1.140969 |
| 11               | 6                | 0              | 4.772057                | 0.723174  | -1.119021 |
| 12               | 1                | 0              | 5.174723                | 1.541323  | -0.511328 |
| 13               | 7                | 0              | 4.289781                | -0.348621 | -0.233691 |
| 14               | 6                | 0              | 3.497384                | 1.125240  | -1.909764 |
| 15               | 1                | 0              | 3.524725                | 0.645266  | -2.898592 |
| 16               | 6                | 0              | 5.806224                | -2.206484 | 0.249198  |
| 17               | 1                | 0              | 5.584449                | -2.617330 | -0.731717 |
| 18               | 6                | 0              | 2.055105                | -1.334994 | 0.417976  |
| 19               | 6                | 0              | 1.330131                | -3.107283 | 1.902753  |
| 20               | 1                | 0              | 1.552657                | -3.802430 | 2.706261  |
| 21               | 6                | 0              | 5.180505                | -1.027180 | 0.660361  |
| 22               | 6                | 0              | -3.381061               | -4.909603 | 0.420008  |
| 23               | 1                | 0              | -3.138092               | -5.396447 | -0.520091 |
| 24               | 6                | 0              | 5.468560                | -0.486077 | 1.919596  |
| 25               | 1                | 0              | 4.985908                | 0.435418  | 2.233712  |
| 26               | 6                | 0              | -3.431851               | -2.912029 | 1.790101  |
| 27               | 1                | 0              | -3.244070               | -1.847816 | 1.905691  |
| 28               | 6                | 0              | 0.771352                | -1.336140 | -0.129590 |
| 29               | 6                | 0              | 2.333522                | -2.240488 | 1.457382  |
| 30               | 1                | 0              | 3.311653                | -2.279636 | 1.920593  |
| 31               | 6                | 0              | 0.052213                | -3.112577 | 1.331525  |
| 32               | 1                | 0              | -0.692586               | -3.814586 | 1.688465  |
| 33               | 6                | 0              | -0.238553               | -2.210274 | 0.297917  |
| 34               | 6                | 0              | 6.363799                | -1.139445 | 2.764563  |
| 35               | 1                | 0              | 6.577368                | -0.717964 | 3.743903  |
| 36               | 6                | 0              | 2.941058                | -0.381233 | -0.277907 |
| 37               | 6                | 0              | -3.981318               | -3.653706 | 2.836857  |
| 38               | 1                | 0              | -4.213642               | -3.157094 | 3.775565  |
| 39               | 6                | 0              | -3.939141               | -5.635857 | 1.470340  |
| 40               | 1                | 0              | -4.134519               | -6.697302 | 1.338731  |
| 41               | 6                | 0              | 6.995212                | -2.331693 | 2.372809  |

|    |   |   |           |           |           |
|----|---|---|-----------|-----------|-----------|
| 42 | 6 | 0 | -4.247854 | -5.023126 | 2.695735  |
| 43 | 6 | 0 | 6.701584  | -2.851236 | 1.104444  |
| 44 | 1 | 0 | 7.178694  | -3.772775 | 0.780989  |
| 45 | 6 | 0 | 7.972162  | -3.022254 | 3.293344  |
| 46 | 1 | 0 | 8.262285  | -4.003444 | 2.904850  |
| 47 | 1 | 0 | 7.545818  | -3.163807 | 4.293669  |
| 48 | 1 | 0 | 8.886881  | -2.427953 | 3.416869  |
| 49 | 6 | 0 | -4.870407 | -5.817968 | 3.817870  |
| 50 | 1 | 0 | -4.837326 | -5.268244 | 4.763767  |
| 51 | 1 | 0 | -4.359174 | -6.777136 | 3.960201  |
| 52 | 1 | 0 | -5.922919 | -6.045027 | 3.602171  |
| 53 | 1 | 0 | 5.569796  | 0.350664  | -1.765636 |
| 54 | 1 | 0 | -4.303162 | -1.702145 | -1.113974 |
| 55 | 6 | 0 | -2.155717 | -1.924829 | -3.824217 |
| 56 | 6 | 0 | 3.374379  | 2.656571  | -2.155473 |
| 57 | 6 | 0 | 4.687029  | 3.147872  | -2.804605 |
| 58 | 1 | 0 | 4.595694  | 4.206449  | -3.074848 |
| 59 | 1 | 0 | 5.547418  | 3.056631  | -2.132208 |
| 60 | 1 | 0 | 4.912744  | 2.589986  | -3.722362 |
| 61 | 6 | 0 | 2.230022  | 2.933814  | -3.144742 |
| 62 | 1 | 0 | 2.396113  | 2.412566  | -4.096574 |
| 63 | 1 | 0 | 1.262160  | 2.613745  | -2.753948 |
| 64 | 1 | 0 | 2.166693  | 4.007141  | -3.362436 |
| 65 | 6 | 0 | 3.126312  | 3.421419  | -0.844563 |
| 66 | 1 | 0 | 2.212507  | 3.071367  | -0.353310 |
| 67 | 1 | 0 | 3.952514  | 3.305086  | -0.132662 |
| 68 | 1 | 0 | 3.018792  | 4.493876  | -1.046629 |
| 69 | 6 | 0 | -1.147527 | -0.975770 | -4.497848 |
| 70 | 1 | 0 | -1.551779 | 0.037179  | -4.601185 |
| 71 | 1 | 0 | -0.210740 | -0.906051 | -3.925617 |
| 72 | 1 | 0 | -0.892803 | -1.342885 | -5.499353 |
| 73 | 6 | 0 | -3.429453 | -1.975970 | -4.691876 |
| 74 | 1 | 0 | -4.176168 | -2.671977 | -4.292504 |
| 75 | 1 | 0 | -3.897197 | -0.986621 | -4.771460 |
| 76 | 1 | 0 | -3.181228 | -2.309752 | -5.706049 |
| 77 | 6 | 0 | -1.533694 | -3.329636 | -3.730842 |
| 78 | 1 | 0 | -2.217733 | -4.060143 | -3.284610 |
| 79 | 1 | 0 | -1.281564 | -3.692328 | -4.734376 |
| 80 | 1 | 0 | -0.607800 | -3.324904 | -3.142928 |
| 81 | 8 | 0 | -0.875403 | 1.773458  | -2.565258 |
| 82 | 8 | 0 | -0.347226 | 1.123680  | 0.020423  |
| 83 | 6 | 0 | -1.492148 | 2.390125  | -1.704513 |
| 84 | 6 | 0 | -1.273628 | 2.112138  | -0.194382 |
| 85 | 8 | 0 | -2.373321 | 3.334585  | -1.951636 |

|     |   |   |           |          |           |
|-----|---|---|-----------|----------|-----------|
| 86  | 6 | 0 | -2.626547 | 3.671949 | -3.346461 |
| 87  | 1 | 0 | -3.378158 | 4.458976 | -3.312298 |
| 88  | 1 | 0 | -1.706332 | 4.031607 | -3.810674 |
| 89  | 1 | 0 | -3.006352 | 2.795990 | -3.875036 |
| 90  | 6 | 0 | -2.633684 | 1.689471 | 0.441965  |
| 91  | 9 | 0 | -3.501514 | 2.714301 | 0.555476  |
| 92  | 9 | 0 | -2.431696 | 1.187847 | 1.675628  |
| 93  | 9 | 0 | -3.242324 | 0.735242 | -0.293239 |
| 94  | 6 | 0 | -2.189850 | 4.478121 | 5.154008  |
| 95  | 6 | 0 | -1.329547 | 3.873066 | 4.257142  |
| 96  | 6 | 0 | -1.458686 | 4.096806 | 2.849017  |
| 97  | 6 | 0 | -2.495382 | 4.980709 | 2.408439  |
| 98  | 6 | 0 | -3.336896 | 5.594415 | 3.317548  |
| 99  | 6 | 0 | -3.191389 | 5.342435 | 4.689071  |
| 100 | 1 | 0 | -2.089091 | 4.283459 | 6.216652  |
| 101 | 1 | 0 | -0.574745 | 3.196789 | 4.636137  |
| 102 | 1 | 0 | -2.617332 | 5.210754 | 1.358250  |
| 103 | 1 | 0 | -4.107500 | 6.273500 | 2.968300  |
| 104 | 1 | 0 | -3.858872 | 5.823500 | 5.398171  |
| 105 | 6 | 0 | -0.580646 | 3.458072 | 1.931288  |
| 106 | 6 | 0 | 0.635396  | 2.726566 | 2.347173  |
| 107 | 1 | 0 | 1.500193  | 3.231585 | 1.890823  |
| 108 | 1 | 0 | 0.799006  | 2.648036 | 3.418916  |
| 109 | 1 | 0 | 0.617825  | 1.732610 | 1.875370  |
| 110 | 6 | 0 | -0.800501 | 3.497539 | 0.451887  |
| 111 | 1 | 0 | 0.158030  | 3.708226 | -0.032127 |
| 112 | 1 | 0 | -1.511074 | 4.261055 | 0.150175  |

---

**TS3R<sub>endo</sub>**

Imaginary frequency= -1017.95

Total energy= -2678.03018869

Sum of electronic and zero-point Energies= -2677.102359

Sum of electronic and thermal Energies= -2677.046852

Sum of electronic and thermal Enthalpies= -2677.045907

Sum of electronic and thermal Free Energies= -2677.193121

---

| Center<br>Number | Atomic<br>Number | Atomic<br>Type | Coordinates (Angstroms) |           |          |
|------------------|------------------|----------------|-------------------------|-----------|----------|
|                  |                  |                | X                       | Y         | Z        |
| 1                | 45               | 0              | 0.175456                | -0.280015 | 0.854915 |
| 2                | 6                | 0              | -1.365433               | 2.574510  | 1.319957 |
| 3                | 1                | 0              | -2.321839               | 2.199758  | 0.955335 |
| 4                | 7                | 0              | 0.375161                | 3.794660  | 0.257480 |

|    |   |   |           |           |           |
|----|---|---|-----------|-----------|-----------|
| 5  | 6 | 0 | 0.692513  | 2.489985  | 0.298224  |
| 6  | 6 | 0 | 1.190693  | 4.908854  | -0.122044 |
| 7  | 7 | 0 | -0.277969 | 1.724571  | 0.783460  |
| 8  | 6 | 0 | -1.039980 | 3.948667  | 0.675393  |
| 9  | 1 | 0 | -1.129714 | 4.789004  | 1.365315  |
| 10 | 7 | 0 | 1.388525  | -2.036433 | 0.950124  |
| 11 | 6 | 0 | 2.660463  | -4.028641 | 1.066690  |
| 12 | 1 | 0 | 2.448384  | -4.677160 | 0.206863  |
| 13 | 7 | 0 | 3.453469  | -2.866525 | 0.614917  |
| 14 | 6 | 0 | 1.393869  | -3.356929 | 1.642325  |
| 15 | 1 | 0 | 1.573795  | -3.149527 | 2.708398  |
| 16 | 6 | 0 | 5.887236  | -3.073117 | 0.742997  |
| 17 | 1 | 0 | 5.824120  | -2.914229 | 1.815743  |
| 18 | 6 | 0 | 2.939514  | -0.446739 | 0.042577  |
| 19 | 6 | 0 | 4.212694  | 1.433127  | -0.805063 |
| 20 | 1 | 0 | 5.136376  | 1.824647  | -1.219004 |
| 21 | 6 | 0 | 4.722441  | -3.052516 | -0.027828 |
| 22 | 6 | 0 | 0.997275  | 5.519437  | -1.366915 |
| 23 | 1 | 0 | 0.256387  | 5.120718  | -2.054176 |
| 24 | 6 | 0 | 4.794769  | -3.268597 | -1.409643 |
| 25 | 1 | 0 | 3.886084  | -3.268784 | -2.005372 |
| 26 | 6 | 0 | 2.141640  | 5.419250  | 0.766194  |
| 27 | 1 | 0 | 2.282144  | 4.951248  | 1.735857  |
| 28 | 6 | 0 | 1.877736  | 0.435832  | 0.244578  |
| 29 | 6 | 0 | 4.133705  | 0.073578  | -0.487686 |
| 30 | 1 | 0 | 4.994440  | -0.561980 | -0.655081 |
| 31 | 6 | 0 | 3.136782  | 2.303462  | -0.599376 |
| 32 | 1 | 0 | 3.236733  | 3.352368  | -0.852819 |
| 33 | 6 | 0 | 1.943383  | 1.801471  | -0.058586 |
| 34 | 6 | 0 | 6.033111  | -3.482225 | -2.012083 |
| 35 | 1 | 0 | 6.081504  | -3.647135 | -3.085756 |
| 36 | 6 | 0 | 2.615325  | -1.811517 | 0.496609  |
| 37 | 6 | 0 | 2.907432  | 6.526651  | 0.397829  |
| 38 | 1 | 0 | 3.649673  | 6.914362  | 1.090823  |
| 39 | 6 | 0 | 1.762694  | 6.629831  | -1.717733 |
| 40 | 1 | 0 | 1.609489  | 7.097212  | -2.687454 |
| 41 | 6 | 0 | 7.216995  | -3.494156 | -1.256338 |
| 42 | 6 | 0 | 2.730171  | 7.152362  | -0.843733 |
| 43 | 6 | 0 | 7.121101  | -3.291748 | 0.127975  |
| 44 | 1 | 0 | 8.023596  | -3.303638 | 0.733666  |
| 45 | 6 | 0 | 8.554444  | -3.703853 | -1.923587 |
| 46 | 1 | 0 | 9.329746  | -3.959826 | -1.194666 |
| 47 | 1 | 0 | 8.880166  | -2.794899 | -2.446954 |
| 48 | 1 | 0 | 8.507788  | -4.504048 | -2.671024 |



|    |   |   |           |           |           |
|----|---|---|-----------|-----------|-----------|
| 49 | 6 | 0 | 3.541780  | 8.365156  | -1.228861 |
| 50 | 1 | 0 | 2.924086  | 9.272891  | -1.217656 |
| 51 | 1 | 0 | 3.949170  | 8.268133  | -2.241967 |
| 52 | 1 | 0 | 4.375974  | 8.522673  | -0.538019 |
| 53 | 1 | 0 | 3.211068  | -4.600372 | 1.815004  |
| 54 | 1 | 0 | -1.659965 | 4.148911  | -0.205153 |
| 55 | 6 | 0 | -1.427104 | 2.574077  | 2.884706  |
| 56 | 6 | 0 | 0.093819  | -4.193919 | 1.563673  |
| 57 | 6 | 0 | 0.379657  | -5.583442 | 2.171971  |
| 58 | 1 | 0 | -0.549461 | -6.161428 | 2.238473  |
| 59 | 1 | 0 | 1.084106  | -6.162923 | 1.564089  |
| 60 | 1 | 0 | 0.791705  | -5.499868 | 3.185473  |
| 61 | 6 | 0 | -0.982258 | -3.502430 | 2.419761  |
| 62 | 1 | 0 | -0.646472 | -3.396462 | 3.459183  |
| 63 | 1 | 0 | -1.223784 | -2.504677 | 2.036385  |
| 64 | 1 | 0 | -1.904553 | -4.094827 | 2.431243  |
| 65 | 6 | 0 | -0.404171 | -4.359218 | 0.117498  |
| 66 | 1 | 0 | -0.670247 | -3.394506 | -0.328750 |
| 67 | 1 | 0 | 0.348513  | -4.830462 | -0.525525 |
| 68 | 1 | 0 | -1.294425 | -4.999345 | 0.097178  |
| 69 | 6 | 0 | -1.591647 | 1.131605  | 3.398330  |
| 70 | 1 | 0 | -2.452568 | 0.634015  | 2.938502  |
| 71 | 1 | 0 | -0.698669 | 0.518564  | 3.199842  |
| 72 | 1 | 0 | -1.737865 | 1.131246  | 4.485180  |
| 73 | 6 | 0 | -2.672881 | 3.382687  | 3.303152  |
| 74 | 1 | 0 | -2.615109 | 4.427166  | 2.975136  |
| 75 | 1 | 0 | -3.588325 | 2.947327  | 2.883490  |
| 76 | 1 | 0 | -2.773413 | 3.387055  | 4.394592  |
| 77 | 6 | 0 | -0.169920 | 3.191127  | 3.524825  |
| 78 | 1 | 0 | -0.037259 | 4.244221  | 3.252625  |
| 79 | 1 | 0 | -0.248809 | 3.147863  | 4.617649  |
| 80 | 1 | 0 | 0.739477  | 2.646724  | 3.242486  |
| 81 | 8 | 0 | -0.152324 | -0.712983 | -1.091851 |
| 82 | 8 | 0 | -2.360535 | -0.594924 | 0.448051  |
| 83 | 6 | 0 | -1.265834 | -0.874232 | -1.632312 |
| 84 | 6 | 0 | -2.597448 | -0.713328 | -0.878648 |
| 85 | 8 | 0 | -1.359847 | -1.156736 | -2.896311 |
| 86 | 6 | 0 | -0.141249 | -1.237384 | -3.703167 |
| 87 | 1 | 0 | -0.494188 | -1.442920 | -4.711634 |
| 88 | 1 | 0 | 0.385410  | -0.283181 | -3.656779 |
| 89 | 1 | 0 | 0.485813  | -2.049482 | -3.332493 |
| 90 | 6 | 0 | -3.249934 | 0.596100  | -1.433931 |
| 91 | 9 | 0 | -2.347480 | 1.607040  | -1.450175 |
| 92 | 9 | 0 | -4.275393 | 0.973296  | -0.656682 |

|     |   |   |           |           |           |
|-----|---|---|-----------|-----------|-----------|
| 93  | 9 | 0 | -3.703032 | 0.469066  | -2.698417 |
| 94  | 6 | 0 | -8.412872 | -1.683573 | -0.032536 |
| 95  | 6 | 0 | -7.091155 | -1.965411 | 0.287204  |
| 96  | 6 | 0 | -6.048722 | -1.730284 | -0.644931 |
| 97  | 6 | 0 | -6.402021 | -1.218896 | -1.918178 |
| 98  | 6 | 0 | -7.726124 | -0.937928 | -2.232052 |
| 99  | 6 | 0 | -8.735609 | -1.166628 | -1.291817 |
| 100 | 1 | 0 | -9.195566 | -1.876469 | 0.694740  |
| 101 | 1 | 0 | -6.870860 | -2.398193 | 1.255679  |
| 102 | 1 | 0 | -5.641923 | -1.018226 | -2.662067 |
| 103 | 1 | 0 | -7.973234 | -0.540800 | -3.211867 |
| 104 | 1 | 0 | -9.770583 | -0.952281 | -1.542533 |
| 105 | 6 | 0 | -4.676354 | -2.067718 | -0.298359 |
| 106 | 6 | 0 | -4.231818 | -2.310869 | 1.021912  |
| 107 | 1 | 0 | -3.383197 | -1.356796 | 1.015510  |
| 108 | 1 | 0 | -4.935082 | -2.266118 | 1.849143  |
| 109 | 1 | 0 | -3.477697 | -3.091590 | 1.131839  |
| 110 | 6 | 0 | -3.541983 | -1.985613 | -1.262307 |
| 111 | 1 | 0 | -2.892446 | -2.854025 | -1.122726 |
| 112 | 1 | 0 | -3.823892 | -1.931794 | -2.310619 |

---

**TS3S<sub>endo</sub>**

Imaginary frequency= -1225.51

Total energy= -2678.02493145

Sum of electronic and zero-point Energies= -2677.097110

Sum of electronic and thermal Energies= -2677.041477

Sum of electronic and thermal Enthalpies= -2677.040533

Sum of electronic and thermal Free Energies= -2677.188552

---

| Center<br>Number | Atomic<br>Number | Atomic<br>Type | Coordinates (Angstroms) |           |           |
|------------------|------------------|----------------|-------------------------|-----------|-----------|
|                  |                  |                | X                       | Y         | Z         |
| 1                | 45               | 0              | 0.088796                | -0.294423 | 0.542409  |
| 2                | 6                | 0              | -0.929218               | 2.653692  | 1.580786  |
| 3                | 1                | 0              | -1.987339               | 2.484824  | 1.367966  |
| 4                | 7                | 0              | 0.790362                | 3.778434  | 0.391142  |
| 5                | 6                | 0              | 0.900062                | 2.450901  | 0.208605  |
| 6                | 6                | 0              | 1.593122                | 4.830051  | -0.159171 |
| 7                | 7                | 0              | -0.107995               | 1.759473  | 0.733382  |
| 8                | 6                | 0              | -0.500349               | 4.053123  | 1.063209  |
| 9                | 1                | 0              | -0.359559               | 4.790867  | 1.854835  |
| 10               | 7                | 0              | 1.104617                | -2.213261 | 0.356024  |
| 11               | 6                | 0              | 2.421131                | -4.157897 | 0.830466  |

|    |   |   |           |           |           |
|----|---|---|-----------|-----------|-----------|
| 12 | 1 | 0 | 2.387621  | -4.960099 | 0.085733  |
| 13 | 7 | 0 | 3.205926  | -3.033183 | 0.299549  |
| 14 | 6 | 0 | 1.030158  | -3.520034 | 1.095347  |
| 15 | 1 | 0 | 0.948569  | -3.274071 | 2.163753  |
| 16 | 6 | 0 | 5.491322  | -2.605576 | 1.074344  |
| 17 | 1 | 0 | 5.085322  | -2.099945 | 1.945918  |
| 18 | 6 | 0 | 2.781018  | -0.667338 | -0.432929 |
| 19 | 6 | 0 | 4.149647  | 1.114913  | -1.333465 |
| 20 | 1 | 0 | 5.061582  | 1.435500  | -1.826991 |
| 21 | 6 | 0 | 4.622919  | -3.129746 | 0.109781  |
| 22 | 6 | 0 | 1.493068  | 5.162029  | -1.513372 |
| 23 | 1 | 0 | 0.825742  | 4.600765  | -2.161368 |
| 24 | 6 | 0 | 5.137415  | -3.797664 | -1.004441 |
| 25 | 1 | 0 | 4.460357  | -4.207523 | -1.748609 |
| 26 | 6 | 0 | 2.437061  | 5.566022  | 0.680769  |
| 27 | 1 | 0 | 2.508007  | 5.307297  | 1.733078  |
| 28 | 6 | 0 | 1.826195  | 0.294051  | -0.114170 |
| 29 | 6 | 0 | 3.963915  | -0.244571 | -1.063818 |
| 30 | 1 | 0 | 4.729195  | -0.955934 | -1.349752 |
| 31 | 6 | 0 | 3.197964  | 2.074865  | -0.972345 |
| 32 | 1 | 0 | 3.388182  | 3.121600  | -1.177930 |
| 33 | 6 | 0 | 2.009499  | 1.662645  | -0.349921 |
| 34 | 6 | 0 | 6.519495  | -3.926768 | -1.155466 |
| 35 | 1 | 0 | 6.913453  | -4.444011 | -2.026472 |
| 36 | 6 | 0 | 2.379103  | -2.007654 | 0.030481  |
| 37 | 6 | 0 | 3.183450  | 6.619973  | 0.158764  |
| 38 | 1 | 0 | 3.838773  | 7.185626  | 0.816625  |
| 39 | 6 | 0 | 2.252403  | 6.216041  | -2.024942 |
| 40 | 1 | 0 | 2.172720  | 6.465926  | -3.079773 |
| 41 | 6 | 0 | 7.406768  | -3.400609 | -0.205664 |
| 42 | 6 | 0 | 3.107090  | 6.962110  | -1.201561 |
| 43 | 6 | 0 | 6.868508  | -2.736551 | 0.908633  |
| 44 | 1 | 0 | 7.537359  | -2.322029 | 1.659066  |
| 45 | 6 | 0 | 8.900257  | -3.556190 | -0.358477 |
| 46 | 1 | 0 | 9.417936  | -2.599892 | -0.217928 |
| 47 | 1 | 0 | 9.163569  | -3.944584 | -1.347198 |
| 48 | 1 | 0 | 9.302128  | -4.250864 | 0.390751  |
| 49 | 6 | 0 | 3.929304  | 8.100847  | -1.753714 |
| 50 | 1 | 0 | 3.767385  | 9.022250  | -1.181516 |
| 51 | 1 | 0 | 3.681325  | 8.302878  | -2.800256 |
| 52 | 1 | 0 | 5.002421  | 7.876383  | -1.700487 |
| 53 | 1 | 0 | 2.888252  | -4.545812 | 1.738298  |
| 54 | 1 | 0 | -1.208648 | 4.458386  | 0.330744  |
| 55 | 6 | 0 | -0.707456 | 2.414923  | 3.114152  |

|    |   |   |           |           |           |
|----|---|---|-----------|-----------|-----------|
| 56 | 6 | 0 | -0.154472 | -4.466341 | 0.755665  |
| 57 | 6 | 0 | 0.066792  | -5.800350 | 1.503758  |
| 58 | 1 | 0 | -0.803124 | -6.452283 | 1.362257  |
| 59 | 1 | 0 | 0.944802  | -6.345677 | 1.140424  |
| 60 | 1 | 0 | 0.188109  | -5.639018 | 2.582614  |
| 61 | 6 | 0 | -1.465656 | -3.855073 | 1.280422  |
| 62 | 1 | 0 | -1.431333 | -3.754791 | 2.373973  |
| 63 | 1 | 0 | -1.668226 | -2.869278 | 0.860456  |
| 64 | 1 | 0 | -2.314391 | -4.505491 | 1.037016  |
| 65 | 6 | 0 | -0.239110 | -4.736625 | -0.757086 |
| 66 | 1 | 0 | -0.321503 | -3.807530 | -1.328134 |
| 67 | 1 | 0 | 0.641156  | -5.278772 | -1.122345 |
| 68 | 1 | 0 | -1.116622 | -5.353311 | -0.982751 |
| 69 | 6 | 0 | -1.012284 | 0.947770  | 3.471598  |
| 70 | 1 | 0 | -2.017895 | 0.646909  | 3.162648  |
| 71 | 1 | 0 | -0.291908 | 0.249244  | 3.015439  |
| 72 | 1 | 0 | -0.938875 | 0.805166  | 4.556284  |
| 73 | 6 | 0 | -1.696577 | 3.315465  | 3.881895  |
| 74 | 1 | 0 | -1.519097 | 4.379928  | 3.690033  |
| 75 | 1 | 0 | -2.736006 | 3.092689  | 3.610246  |
| 76 | 1 | 0 | -1.592786 | 3.155889  | 4.961301  |
| 77 | 6 | 0 | 0.732451  | 2.737514  | 3.553568  |
| 78 | 1 | 0 | 0.988507  | 3.791714  | 3.402652  |
| 79 | 1 | 0 | 0.848173  | 2.526428  | 4.623256  |
| 80 | 1 | 0 | 1.467051  | 2.123495  | 3.018909  |
| 81 | 8 | 0 | -0.480061 | -0.137674 | -1.381852 |
| 82 | 8 | 0 | -2.342943 | -0.721053 | 0.472553  |
| 83 | 6 | 0 | -1.675810 | -0.170054 | -1.741273 |
| 84 | 6 | 0 | -2.826789 | -0.519871 | -0.788133 |
| 85 | 8 | 0 | -2.010863 | 0.047177  | -2.975036 |
| 86 | 6 | 0 | -0.959069 | 0.306196  | -3.962117 |
| 87 | 1 | 0 | -1.493596 | 0.444455  | -4.899382 |
| 88 | 1 | 0 | -0.413163 | 1.208204  | -3.681478 |
| 89 | 1 | 0 | -0.293648 | -0.556951 | -4.011361 |
| 90 | 6 | 0 | -3.452746 | -1.847589 | -1.327370 |
| 91 | 9 | 0 | -4.151074 | -1.682993 | -2.468446 |
| 92 | 9 | 0 | -4.271290 | -2.380886 | -0.409782 |
| 93 | 9 | 0 | -2.478230 | -2.745692 | -1.591923 |
| 94 | 6 | 0 | -8.543192 | -0.441007 | 0.756888  |
| 95 | 6 | 0 | -7.228192 | -0.069506 | 1.002521  |
| 96 | 6 | 0 | -6.290593 | 0.038901  | -0.055533 |
| 97 | 6 | 0 | -6.745494 | -0.218744 | -1.372096 |
| 98 | 6 | 0 | -8.063465 | -0.588571 | -1.612208 |
| 99 | 6 | 0 | -8.965914 | -0.704096 | -0.550913 |

|     |   |   |           |           |           |
|-----|---|---|-----------|-----------|-----------|
| 100 | 1 | 0 | -9.244980 | -0.515954 | 1.581962  |
| 101 | 1 | 0 | -6.930399 | 0.158199  | 2.019102  |
| 102 | 1 | 0 | -6.070889 | -0.150113 | -2.215214 |
| 103 | 1 | 0 | -8.388128 | -0.786469 | -2.629191 |
| 104 | 1 | 0 | -9.996584 | -0.988911 | -0.742124 |
| 105 | 6 | 0 | -4.927206 | 0.467321  | 0.220672  |
| 106 | 6 | 0 | -4.363586 | 0.540515  | 1.510936  |
| 107 | 1 | 0 | -3.699803 | 1.387835  | 1.691518  |
| 108 | 1 | 0 | -4.952729 | 0.258577  | 2.379432  |
| 109 | 1 | 0 | -3.358413 | -0.255426 | 1.241649  |
| 110 | 6 | 0 | -3.909336 | 0.676825  | -0.855071 |
| 111 | 1 | 0 | -3.331543 | 1.579853  | -0.636358 |
| 112 | 1 | 0 | -4.308054 | 0.761602  | -1.862409 |

---

**TS3R<sub>exo</sub>**

Imaginary frequency= -1385.67

Total energy= -2678.03305821

Sum of electronic and zero-point Energies= -2677.106575

Sum of electronic and thermal Energies= -2677.050305

Sum of electronic and thermal Enthalpies= -2677.049361

Sum of electronic and thermal Free Energies= -2677.201229

---

| Center<br>Number | Atomic<br>Number | Atomic<br>Type | Coordinates (Angstroms) |           |           |
|------------------|------------------|----------------|-------------------------|-----------|-----------|
|                  |                  |                | X                       | Y         | Z         |
| 1                | 45               | 0              | -0.129634               | -0.224545 | -1.420630 |
| 2                | 6                | 0              | 3.085949                | -0.277285 | -2.166407 |
| 3                | 1                | 0              | 3.154573                | -1.367730 | -2.149632 |
| 4                | 7                | 0              | 3.578753                | 1.378453  | -0.535911 |
| 5                | 6                | 0              | 2.255127                | 1.146787  | -0.564751 |
| 6                | 6                | 0              | 4.307683                | 2.370524  | 0.198783  |
| 7                | 7                | 0              | 1.908869                | 0.149460  | -1.372084 |
| 8                | 6                | 0              | 4.256901                | 0.353509  | -1.366383 |
| 9                | 1                | 0              | 5.008305                | 0.830396  | -1.998649 |
| 10               | 7                | 0              | -2.238560               | 0.205322  | -1.275552 |
| 11               | 6                | 0              | -4.473094               | 0.991919  | -1.576398 |
| 12               | 1                | 0              | -5.238101               | 0.454114  | -1.006266 |
| 13               | 7                | 0              | -3.680358               | 1.826146  | -0.655654 |
| 14               | 6                | 0              | -3.408873               | 0.050798  | -2.196993 |
| 15               | 1                | 0              | -3.092248               | 0.463425  | -3.166825 |
| 16               | 6                | 0              | -4.636576               | 4.045565  | -0.284789 |
| 17               | 1                | 0              | -4.353364               | 4.313882  | -1.298649 |
| 18               | 6                | 0              | -1.302876               | 1.874786  | 0.185982  |

|    |   |   |           |           |           |
|----|---|---|-----------|-----------|-----------|
| 19 | 6 | 0 | -0.010973 | 3.445147  | 1.505153  |
| 20 | 1 | 0 | 0.017738  | 4.271760  | 2.207176  |
| 21 | 6 | 0 | -4.323574 | 2.773314  | 0.206862  |
| 22 | 6 | 0 | 4.502997  | 3.642154  | -0.345269 |
| 23 | 1 | 0 | 4.070875  | 3.889228  | -1.310503 |
| 24 | 6 | 0 | -4.691935 | 2.417290  | 1.507945  |
| 25 | 1 | 0 | -4.464416 | 1.423118  | 1.882469  |
| 26 | 6 | 0 | 4.872890  | 2.043210  | 1.437151  |
| 27 | 1 | 0 | 4.727068  | 1.050888  | 1.853430  |
| 28 | 6 | 0 | -0.094833 | 1.332540  | -0.252369 |
| 29 | 6 | 0 | -1.252016 | 2.952895  | 1.087768  |
| 30 | 1 | 0 | -2.157070 | 3.411761  | 1.464303  |
| 31 | 6 | 0 | 1.191286  | 2.915412  | 1.026368  |
| 32 | 1 | 0 | 2.133791  | 3.341104  | 1.352300  |
| 33 | 6 | 0 | 1.155848  | 1.842999  | 0.122619  |
| 34 | 6 | 0 | -5.347793 | 3.344945  | 2.319891  |
| 35 | 1 | 0 | -5.625774 | 3.063109  | 3.332581  |
| 36 | 6 | 0 | -2.454515 | 1.276701  | -0.520006 |
| 37 | 6 | 0 | 5.620052  | 2.995506  | 2.128373  |
| 38 | 1 | 0 | 6.053716  | 2.735614  | 3.090972  |
| 39 | 6 | 0 | 5.250299  | 4.588304  | 0.359511  |
| 40 | 1 | 0 | 5.395036  | 5.577276  | -0.066932 |
| 41 | 6 | 0 | -5.661863 | 4.627516  | 1.849168  |
| 42 | 6 | 0 | 5.821702  | 4.282328  | 1.602826  |
| 43 | 6 | 0 | -5.298271 | 4.958871  | 0.533116  |
| 44 | 1 | 0 | -5.533572 | 5.947227  | 0.145646  |
| 45 | 6 | 0 | -6.369122 | 5.632336  | 2.726073  |
| 46 | 1 | 0 | -6.650296 | 5.195528  | 3.688326  |
| 47 | 1 | 0 | -7.280401 | 6.006072  | 2.243572  |
| 48 | 1 | 0 | -5.731768 | 6.503661  | 2.924449  |
| 49 | 6 | 0 | 6.641119  | 5.299975  | 2.358882  |
| 50 | 1 | 0 | 6.669315  | 6.258923  | 1.833864  |
| 51 | 1 | 0 | 7.675287  | 4.955253  | 2.489373  |
| 52 | 1 | 0 | 6.232806  | 5.472769  | 3.362602  |
| 53 | 1 | 0 | -4.969162 | 1.616826  | -2.321686 |
| 54 | 1 | 0 | 4.759496  | -0.369947 | -0.714479 |
| 55 | 6 | 0 | 3.012085  | 0.170584  | -3.667595 |
| 56 | 6 | 0 | -3.922364 | -1.387577 | -2.468376 |
| 57 | 6 | 0 | -5.126501 | -1.279935 | -3.429906 |
| 58 | 1 | 0 | -5.480891 | -2.281729 | -3.699418 |
| 59 | 1 | 0 | -5.969269 | -0.744161 | -2.979341 |
| 60 | 1 | 0 | -4.852591 | -0.762635 | -4.358354 |
| 61 | 6 | 0 | -2.818787 | -2.195535 | -3.172892 |
| 62 | 1 | 0 | -2.512103 | -1.705710 | -4.107555 |

|     |   |   |           |           |           |
|-----|---|---|-----------|-----------|-----------|
| 63  | 1 | 0 | -1.933070 | -2.310806 | -2.545316 |
| 64  | 1 | 0 | -3.180716 | -3.198662 | -3.427394 |
| 65  | 6 | 0 | -4.367229 | -2.093669 | -1.173604 |
| 66  | 1 | 0 | -3.592563 | -2.059880 | -0.404094 |
| 67  | 1 | 0 | -5.276908 | -1.646129 | -0.757403 |
| 68  | 1 | 0 | -4.593071 | -3.146689 | -1.378976 |
| 69  | 6 | 0 | 1.702727  | -0.326116 | -4.306178 |
| 70  | 1 | 0 | 1.595539  | -1.412414 | -4.228739 |
| 71  | 1 | 0 | 0.821260  | 0.136288  | -3.833266 |
| 72  | 1 | 0 | 1.676475  | -0.055114 | -5.368211 |
| 73  | 6 | 0 | 4.195270  | -0.484055 | -4.409612 |
| 74  | 1 | 0 | 5.163461  | -0.163534 | -4.007211 |
| 75  | 1 | 0 | 4.148766  | -1.578428 | -4.345020 |
| 76  | 1 | 0 | 4.173517  | -0.210816 | -5.471060 |
| 77  | 6 | 0 | 3.085432  | 1.700436  | -3.825091 |
| 78  | 1 | 0 | 4.031998  | 2.113738  | -3.460493 |
| 79  | 1 | 0 | 3.005557  | 1.965974  | -4.885879 |
| 80  | 1 | 0 | 2.264419  | 2.204085  | -3.301351 |
| 81  | 8 | 0 | 0.574123  | -2.478117 | -2.153578 |
| 82  | 8 | 0 | -0.151114 | -1.424327 | 0.243225  |
| 83  | 6 | 0 | 0.757291  | -3.183217 | -1.173157 |
| 84  | 6 | 0 | 0.297210  | -2.765245 | 0.236441  |
| 85  | 8 | 0 | 1.318633  | -4.370747 | -1.186095 |
| 86  | 6 | 0 | 1.725729  | -4.906623 | -2.479961 |
| 87  | 1 | 0 | 2.107205  | -5.902296 | -2.261425 |
| 88  | 1 | 0 | 0.861192  | -4.957133 | -3.144580 |
| 89  | 1 | 0 | 2.506958  | -4.277331 | -2.909969 |
| 90  | 6 | 0 | -0.937655 | -3.645566 | 0.589698  |
| 91  | 9 | 0 | -1.801593 | -3.670683 | -0.444318 |
| 92  | 9 | 0 | -1.582399 | -3.162120 | 1.661096  |
| 93  | 9 | 0 | -0.589720 | -4.920031 | 0.844203  |
| 94  | 6 | 0 | 0.498853  | -2.795649 | 6.216239  |
| 95  | 6 | 0 | 0.804627  | -2.177245 | 5.011068  |
| 96  | 6 | 0 | 0.832290  | -2.913397 | 3.800655  |
| 97  | 6 | 0 | 0.557900  | -4.300510 | 3.861269  |
| 98  | 6 | 0 | 0.250052  | -4.914098 | 5.069949  |
| 99  | 6 | 0 | 0.217095  | -4.165784 | 6.250095  |
| 100 | 1 | 0 | 0.490296  | -2.214194 | 7.133165  |
| 101 | 1 | 0 | 1.055109  | -1.122817 | 5.009448  |
| 102 | 1 | 0 | 0.560667  | -4.903861 | 2.962546  |
| 103 | 1 | 0 | 0.034927  | -5.978044 | 5.091700  |
| 104 | 1 | 0 | -0.017194 | -4.649813 | 7.193941  |
| 105 | 6 | 0 | 1.201964  | -2.240614 | 2.559765  |
| 106 | 6 | 0 | 1.191379  | -0.855088 | 2.392623  |

|     |   |   |          |           |          |
|-----|---|---|----------|-----------|----------|
| 107 | 1 | 0 | 0.877943 | -0.192495 | 3.193599 |
| 108 | 1 | 0 | 1.936438 | -0.436020 | 1.716583 |
| 109 | 1 | 0 | 0.304172 | -0.958175 | 1.324498 |
| 110 | 6 | 0 | 1.480605 | -2.979023 | 1.274642 |
| 111 | 1 | 0 | 2.367960 | -2.541642 | 0.808803 |
| 112 | 1 | 0 | 1.664519 | -4.044623 | 1.393794 |

---

**TS3S<sub>exo</sub>**

Imaginary frequency= -1335.10

Total energy= -2678.04037841

Sum of electronic and zero-point Energies= -2677.112413

Sum of electronic and thermal Energies= -2677.056811

Sum of electronic and thermal Enthalpies= -2677.055867

Sum of electronic and thermal Free Energies= -2677.204513

---

| Center<br>Number | Atomic<br>Number | Atomic<br>Type | Coordinates (Angstroms) |           |           |
|------------------|------------------|----------------|-------------------------|-----------|-----------|
|                  |                  |                | X                       | Y         | Z         |
| 1                | 45               | 0              | 0.008110                | -0.277951 | -1.439778 |
| 2                | 6                | 0              | 3.234856                | -0.166568 | -2.023990 |
| 3                | 1                | 0              | 3.360969                | -1.250503 | -1.962579 |
| 4                | 7                | 0              | 3.561033                | 1.536760  | -0.393851 |
| 5                | 6                | 0              | 2.255685                | 1.227670  | -0.477932 |
| 6                | 6                | 0              | 4.195093                | 2.484598  | 0.474488  |
| 7                | 7                | 0              | 2.003066                | 0.219519  | -1.303115 |
| 8                | 6                | 0              | 4.332352                | 0.549054  | -1.185723 |
| 9                | 1                | 0              | 5.080066                | 1.062462  | -1.792583 |
| 10               | 7                | 0              | -2.115751               | 0.019393  | -1.435045 |
| 11               | 6                | 0              | -4.433819               | 0.453105  | -1.654615 |
| 12               | 1                | 0              | -4.998053               | -0.209068 | -0.985177 |
| 13               | 7                | 0              | -3.731632               | 1.476502  | -0.857255 |
| 14               | 6                | 0              | -3.262020               | -0.259181 | -2.363567 |
| 15               | 1                | 0              | -3.046281               | 0.295007  | -3.290351 |
| 16               | 6                | 0              | -4.538447               | 3.782662  | -0.688727 |
| 17               | 1                | 0              | -4.047510               | 4.003515  | -1.632275 |
| 18               | 6                | 0              | -1.372387               | 1.805477  | 0.002418  |
| 19               | 6                | 0              | -0.258283               | 3.429621  | 1.412580  |
| 20               | 1                | 0              | -0.319107               | 4.255669  | 2.114081  |
| 21               | 6                | 0              | -4.442860               | 2.497422  | -0.144761 |
| 22               | 6                | 0              | 4.548147                | 3.747272  | -0.012219 |
| 23               | 1                | 0              | 4.313788                | 4.013390  | -1.038844 |
| 24               | 6                | 0              | -5.078477               | 2.201912  | 1.064949  |
| 25               | 1                | 0              | -5.009237               | 1.201981  | 1.483842  |



|    |   |   |           |           |           |
|----|---|---|-----------|-----------|-----------|
| 26 | 6 | 0 | 4.494928  | 2.135059  | 1.795290  |
| 27 | 1 | 0 | 4.224960  | 1.151454  | 2.169246  |
| 28 | 6 | 0 | -0.109253 | 1.327053  | -0.348415 |
| 29 | 6 | 0 | -1.440846 | 2.880561  | 0.907223  |
| 30 | 1 | 0 | -2.393738 | 3.288205  | 1.221502  |
| 31 | 6 | 0 | 1.002223  | 2.953046  | 1.032205  |
| 32 | 1 | 0 | 1.894959  | 3.416552  | 1.435436  |
| 33 | 6 | 0 | 1.084285  | 1.879401  | 0.133492  |
| 34 | 6 | 0 | -5.794072 | 3.197800  | 1.731240  |
| 35 | 1 | 0 | -6.282492 | 2.962766  | 2.673515  |
| 36 | 6 | 0 | -2.443939 | 1.098207  | -0.724791 |
| 37 | 6 | 0 | 5.133834  | 3.056161  | 2.625597  |
| 38 | 1 | 0 | 5.357146  | 2.780875  | 3.653284  |
| 39 | 6 | 0 | 5.186725  | 4.658324  | 0.828344  |
| 40 | 1 | 0 | 5.449485  | 5.641481  | 0.446000  |
| 41 | 6 | 0 | -5.893518 | 4.495177  | 1.207844  |
| 42 | 6 | 0 | 5.491630  | 4.329798  | 2.158516  |
| 43 | 6 | 0 | -5.251657 | 4.769690  | -0.010386 |
| 44 | 1 | 0 | -5.313007 | 5.768872  | -0.434418 |
| 45 | 6 | 0 | -6.686902 | 5.563489  | 1.919783  |
| 46 | 1 | 0 | -6.879029 | 5.290633  | 2.962292  |
| 47 | 1 | 0 | -7.659235 | 5.720026  | 1.433914  |
| 48 | 1 | 0 | -6.162406 | 6.525575  | 1.906802  |
| 49 | 6 | 0 | 6.206753  | 5.312606  | 3.053174  |
| 50 | 1 | 0 | 5.910938  | 6.343661  | 2.831549  |
| 51 | 1 | 0 | 7.294437  | 5.251478  | 2.912573  |
| 52 | 1 | 0 | 6.002186  | 5.114179  | 4.110385  |
| 53 | 1 | 0 | -5.126267 | 0.925552  | -2.352414 |
| 54 | 1 | 0 | 4.846648  | -0.136803 | -0.503601 |
| 55 | 6 | 0 | 3.196103  | 0.210292  | -3.543078 |
| 56 | 6 | 0 | -3.535283 | -1.730161 | -2.775281 |
| 57 | 6 | 0 | -4.903989 | -1.782327 | -3.489460 |
| 58 | 1 | 0 | -5.075411 | -2.787854 | -3.890621 |
| 59 | 1 | 0 | -5.734509 | -1.553520 | -2.812125 |
| 60 | 1 | 0 | -4.945462 | -1.078637 | -4.330309 |
| 61 | 6 | 0 | -2.463079 | -2.191648 | -3.781008 |
| 62 | 1 | 0 | -2.455414 | -1.546971 | -4.669314 |
| 63 | 1 | 0 | -1.460500 | -2.188057 | -3.346881 |
| 64 | 1 | 0 | -2.673907 | -3.214537 | -4.116470 |
| 65 | 6 | 0 | -3.554963 | -2.670120 | -1.560440 |
| 66 | 1 | 0 | -2.589187 | -2.660401 | -1.045076 |
| 67 | 1 | 0 | -4.330380 | -2.391634 | -0.836983 |
| 68 | 1 | 0 | -3.759893 | -3.699090 | -1.879358 |
| 69 | 6 | 0 | 1.950265  | -0.413513 | -4.202908 |

|     |   |   |           |           |           |
|-----|---|---|-----------|-----------|-----------|
| 70  | 1 | 0 | 1.886008  | -1.490955 | -4.016147 |
| 71  | 1 | 0 | 1.014566  | 0.051187  | -3.850139 |
| 72  | 1 | 0 | 1.985103  | -0.259771 | -5.288264 |
| 73  | 6 | 0 | 4.450180  | -0.393036 | -4.208165 |
| 74  | 1 | 0 | 5.376117  | 0.011626  | -3.783142 |
| 75  | 1 | 0 | 4.474782  | -1.483873 | -4.092766 |
| 76  | 1 | 0 | 4.455434  | -0.168405 | -5.280954 |
| 77  | 6 | 0 | 3.171761  | 1.732461  | -3.770859 |
| 78  | 1 | 0 | 4.087284  | 2.220989  | -3.418363 |
| 79  | 1 | 0 | 3.084826  | 1.946804  | -4.842677 |
| 80  | 1 | 0 | 2.317762  | 2.206274  | -3.271880 |
| 81  | 8 | 0 | 0.388367  | -2.537155 | -2.058003 |
| 82  | 8 | 0 | 0.044820  | -1.329601 | 0.302588  |
| 83  | 6 | 0 | 0.605820  | -3.229849 | -1.070422 |
| 84  | 6 | 0 | 0.464461  | -2.671985 | 0.357297  |
| 85  | 8 | 0 | 0.963641  | -4.489805 | -1.096108 |
| 86  | 6 | 0 | 1.136553  | -5.117038 | -2.402874 |
| 87  | 1 | 0 | 1.412115  | -6.146391 | -2.181759 |
| 88  | 1 | 0 | 0.197415  | -5.074265 | -2.957033 |
| 89  | 1 | 0 | 1.933158  | -4.608414 | -2.948547 |
| 90  | 6 | 0 | 1.853411  | -2.689507 | 1.057978  |
| 91  | 9 | 0 | 2.247140  | -3.935757 | 1.379413  |
| 92  | 9 | 0 | 1.819451  | -1.956040 | 2.181705  |
| 93  | 9 | 0 | 2.803176  | -2.170985 | 0.252784  |
| 94  | 6 | 0 | -1.554836 | -2.882692 | 6.043536  |
| 95  | 6 | 0 | -1.772157 | -2.585343 | 4.704140  |
| 96  | 6 | 0 | -0.920326 | -3.101957 | 3.697150  |
| 97  | 6 | 0 | 0.145133  | -3.943673 | 4.093291  |
| 98  | 6 | 0 | 0.362982  | -4.230878 | 5.436215  |
| 99  | 6 | 0 | -0.483871 | -3.702424 | 6.415055  |
| 100 | 1 | 0 | -2.226318 | -2.485990 | 6.798967  |
| 101 | 1 | 0 | -2.628836 | -1.979870 | 4.430918  |
| 102 | 1 | 0 | 0.826311  | -4.356943 | 3.360456  |
| 103 | 1 | 0 | 1.193736  | -4.869602 | 5.720226  |
| 104 | 1 | 0 | -0.316598 | -3.936689 | 7.462500  |
| 105 | 6 | 0 | -1.204456 | -2.801637 | 2.297817  |
| 106 | 6 | 0 | -1.961536 | -1.704108 | 1.884566  |
| 107 | 1 | 0 | -2.550034 | -1.808400 | 0.972649  |
| 108 | 1 | 0 | -2.352697 | -0.997178 | 2.610474  |
| 109 | 1 | 0 | -0.909424 | -1.239361 | 1.125759  |
| 110 | 6 | 0 | -0.583440 | -3.568120 | 1.157915  |
| 111 | 1 | 0 | -1.374398 | -3.824178 | 0.447535  |
| 112 | 1 | 0 | -0.097926 | -4.495646 | 1.454196  |

---

**M3R<sub>endo</sub>**

Total energy= -2678.06273274

Sum of electronic and zero-point Energies= -2677.130476

Sum of electronic and thermal Energies= -2677.074151

Sum of electronic and thermal Enthalpies= -2677.073207

Sum of electronic and thermal Free Energies= -2677.222993

---

| Center<br>Number | Atomic<br>Number | Atomic<br>Type | Coordinates (Angstroms) |           |           |
|------------------|------------------|----------------|-------------------------|-----------|-----------|
|                  |                  |                | X                       | Y         | Z         |
| 1                | 45               | 0              | 0.413578                | -0.338714 | 1.107787  |
| 2                | 6                | 0              | -1.528206               | 2.252569  | 1.732622  |
| 3                | 1                | 0              | -2.437113               | 1.743077  | 1.405287  |
| 4                | 7                | 0              | -0.108210               | 3.706644  | 0.484279  |
| 5                | 6                | 0              | 0.404772                | 2.466245  | 0.495972  |
| 6                | 6                | 0              | 0.431293                | 4.895790  | -0.107261 |
| 7                | 7                | 0              | -0.360820               | 1.579940  | 1.121716  |
| 8                | 6                | 0              | -1.456006               | 3.673118  | 1.100641  |
| 9                | 1                | 0              | -1.548889               | 4.481630  | 1.828357  |
| 10               | 7                | 0              | 1.826473                | -1.886360 | 0.979860  |
| 11               | 6                | 0              | 3.373754                | -3.682389 | 0.998149  |
| 12               | 1                | 0              | 3.244119                | -4.420169 | 0.197918  |
| 13               | 7                | 0              | 3.927169                | -2.434693 | 0.423639  |
| 14               | 6                | 0              | 2.032531                | -3.209600 | 1.619698  |
| 15               | 1                | 0              | 2.187882                | -3.029139 | 2.693412  |
| 16               | 6                | 0              | 6.358920                | -2.183869 | 0.463288  |
| 17               | 1                | 0              | 6.301517                | -1.979521 | 1.528676  |
| 18               | 6                | 0              | 3.018387                | -0.109372 | -0.085055 |
| 19               | 6                | 0              | 3.888382                | 1.938955  | -1.040679 |
| 20               | 1                | 0              | 4.690021                | 2.464755  | -1.549224 |
| 21               | 6                | 0              | 5.187290                | -2.421505 | -0.259699 |
| 22               | 6                | 0              | 0.161314                | 5.196469  | -1.447507 |
| 23               | 1                | 0              | -0.436372               | 4.512887  | -2.044332 |
| 24               | 6                | 0              | 5.254134                | -2.698371 | -1.630450 |
| 25               | 1                | 0              | 4.342835                | -2.899125 | -2.187078 |
| 26               | 6                | 0              | 1.192103                | 5.775524  | 0.667437  |
| 27               | 1                | 0              | 1.397078                | 5.539093  | 1.707689  |
| 28               | 6                | 0              | 1.865470                | 0.609351  | 0.237957  |
| 29               | 6                | 0              | 4.052102                | 0.582592  | -0.739115 |
| 30               | 1                | 0              | 4.973547                | 0.081738  | -1.010360 |
| 31               | 6                | 0              | 2.728367                | 2.641317  | -0.695793 |
| 32               | 1                | 0              | 2.649120                | 3.695195  | -0.934233 |
| 33               | 6                | 0              | 1.687638                | 1.968018  | -0.035296 |

---

|    |   |   |           |           |           |
|----|---|---|-----------|-----------|-----------|
| 34 | 6 | 0 | 6.491726  | -2.716562 | -2.271224 |
| 35 | 1 | 0 | 6.536666  | -2.931345 | -3.336165 |
| 36 | 6 | 0 | 2.955104  | -1.502341 | 0.399961  |
| 37 | 6 | 0 | 1.692447  | 6.945473  | 0.094466  |
| 38 | 1 | 0 | 2.289825  | 7.621597  | 0.700656  |
| 39 | 6 | 0 | 0.667230  | 6.368281  | -2.006845 |
| 40 | 1 | 0 | 0.459284  | 6.593396  | -3.050209 |
| 41 | 6 | 0 | 7.680166  | -2.468745 | -1.564813 |
| 42 | 6 | 0 | 1.439038  | 7.262658  | -1.247347 |
| 43 | 6 | 0 | 7.591866  | -2.206955 | -0.190052 |
| 44 | 1 | 0 | 8.499398  | -2.018797 | 0.377861  |
| 45 | 6 | 0 | 9.012965  | -2.472829 | -2.273310 |
| 46 | 1 | 0 | 9.842985  | -2.526326 | -1.561998 |
| 47 | 1 | 0 | 9.145311  | -1.559920 | -2.869099 |
| 48 | 1 | 0 | 9.095963  | -3.320553 | -2.962995 |
| 49 | 6 | 0 | 1.964548  | 8.537970  | -1.859897 |
| 50 | 1 | 0 | 1.153363  | 9.261414  | -2.019357 |
| 51 | 1 | 0 | 2.424605  | 8.351989  | -2.838497 |
| 52 | 1 | 0 | 2.711387  | 9.012654  | -1.214648 |
| 53 | 1 | 0 | 4.059295  | -4.090772 | 1.742797  |
| 54 | 1 | 0 | -2.211419 | 3.817444  | 0.321141  |
| 55 | 6 | 0 | -1.508805 | 2.210809  | 3.295030  |
| 56 | 6 | 0 | 0.837158  | -4.189732 | 1.501042  |
| 57 | 6 | 0 | 1.240580  | -5.524589 | 2.157888  |
| 58 | 1 | 0 | 0.387855  | -6.213625 | 2.169671  |
| 59 | 1 | 0 | 2.053838  | -6.018463 | 1.613389  |
| 60 | 1 | 0 | 1.565722  | -5.377344 | 3.195323  |
| 61 | 6 | 0 | -0.351216 | -3.596709 | 2.282384  |
| 62 | 1 | 0 | -0.096016 | -3.453202 | 3.340183  |
| 63 | 1 | 0 | -0.660820 | -2.625122 | 1.874204  |
| 64 | 1 | 0 | -1.215811 | -4.269524 | 2.237421  |
| 65 | 6 | 0 | 0.432160  | -4.433316 | 0.037339  |
| 66 | 1 | 0 | 0.159156  | -3.498576 | -0.464747 |
| 67 | 1 | 0 | 1.238115  | -4.900416 | -0.540460 |
| 68 | 1 | 0 | -0.430162 | -5.109029 | -0.006592 |
| 69 | 6 | 0 | -1.462250 | 0.745656  | 3.770712  |
| 70 | 1 | 0 | -2.284579 | 0.157111  | 3.347001  |
| 71 | 1 | 0 | -0.514358 | 0.253537  | 3.501031  |
| 72 | 1 | 0 | -1.543546 | 0.699224  | 4.863195  |
| 73 | 6 | 0 | -2.822462 | 2.842632  | 3.799084  |
| 74 | 1 | 0 | -2.919065 | 3.891405  | 3.495058  |
| 75 | 1 | 0 | -3.696115 | 2.299579  | 3.417253  |
| 76 | 1 | 0 | -2.861082 | 2.813653  | 4.894172  |
| 77 | 6 | 0 | -0.305439 | 2.966942  | 3.885234  |

|     |   |   |           |           |           |
|-----|---|---|-----------|-----------|-----------|
| 78  | 1 | 0 | -0.329707 | 4.037021  | 3.650301  |
| 79  | 1 | 0 | -0.307306 | 2.877134  | 4.977989  |
| 80  | 1 | 0 | 0.646811  | 2.559063  | 3.524746  |
| 81  | 8 | 0 | -0.210808 | -0.727165 | -0.781412 |
| 82  | 8 | 0 | -2.520349 | -0.881096 | 0.667726  |
| 83  | 6 | 0 | -1.302280 | -0.878584 | -1.360397 |
| 84  | 6 | 0 | -2.689767 | -1.001076 | -0.715378 |
| 85  | 8 | 0 | -1.351846 | -0.977489 | -2.656635 |
| 86  | 6 | 0 | -0.115717 | -0.872156 | -3.431094 |
| 87  | 1 | 0 | -0.437320 | -0.947237 | -4.467679 |
| 88  | 1 | 0 | 0.355548  | 0.091954  | -3.233763 |
| 89  | 1 | 0 | 0.548027  | -1.695791 | -3.164152 |
| 90  | 6 | 0 | -3.537024 | 0.214899  | -1.202192 |
| 91  | 9 | 0 | -2.788614 | 1.346873  | -1.171845 |
| 92  | 9 | 0 | -4.584669 | 0.406328  | -0.388564 |
| 93  | 9 | 0 | -3.987837 | 0.066059  | -2.455583 |
| 94  | 6 | 0 | -8.188468 | -1.530288 | -0.544567 |
| 95  | 6 | 0 | -6.931117 | -1.865472 | -0.044775 |
| 96  | 6 | 0 | -5.906601 | -2.307247 | -0.902516 |
| 97  | 6 | 0 | -6.179800 | -2.388534 | -2.279136 |
| 98  | 6 | 0 | -7.440945 | -2.057832 | -2.778275 |
| 99  | 6 | 0 | -8.449676 | -1.626724 | -1.914478 |
| 100 | 1 | 0 | -8.962073 | -1.183870 | 0.135487  |
| 101 | 1 | 0 | -6.730909 | -1.766064 | 1.018150  |
| 102 | 1 | 0 | -5.415972 | -2.736377 | -2.968127 |
| 103 | 1 | 0 | -7.633383 | -2.138816 | -3.844697 |
| 104 | 1 | 0 | -9.428685 | -1.362395 | -2.304720 |
| 105 | 6 | 0 | -4.580989 | -2.710312 | -0.351485 |
| 106 | 6 | 0 | -4.475493 | -3.359196 | 0.824358  |
| 107 | 1 | 0 | -3.258835 | -1.355722 | 1.105486  |
| 108 | 1 | 0 | -5.350164 | -3.634316 | 1.406541  |
| 109 | 1 | 0 | -3.512610 | -3.685550 | 1.210416  |
| 110 | 6 | 0 | -3.311000 | -2.380211 | -1.121508 |
| 111 | 1 | 0 | -2.548837 | -3.132303 | -0.896147 |
| 112 | 1 | 0 | -3.466373 | -2.385569 | -2.200610 |

---

**M3S<sub>endo</sub>**

Total energy= -2678.05759417

Sum of electronic and zero-point Energies= -2677.124432

Sum of electronic and thermal Energies= -2677.068404

Sum of electronic and thermal Enthalpies= -2677.067460

Sum of electronic and thermal Free Energies= -2677.216096

---

| Center<br>Number | Atomic<br>Number | Atomic<br>Type | Coordinates (Angstroms) |           |           |
|------------------|------------------|----------------|-------------------------|-----------|-----------|
|                  |                  |                | X                       | Y         | Z         |
| 1                | 45               | 0              | 0.307503                | -0.239456 | 0.941526  |
| 2                | 6                | 0              | -1.305025               | 2.484660  | 1.760171  |
| 3                | 1                | 0              | -2.314903               | 2.104856  | 1.591126  |
| 4                | 7                | 0              | 0.108680                | 3.845297  | 0.413014  |
| 5                | 6                | 0              | 0.464503                | 2.556387  | 0.294161  |
| 6                | 6                | 0              | 0.695049                | 4.989666  | -0.220417 |
| 7                | 7                | 0              | -0.354653               | 1.720489  | 0.923758  |
| 8                | 6                | 0              | -1.161842               | 3.918204  | 1.173380  |
| 9                | 1                | 0              | -1.093934               | 4.700232  | 1.931732  |
| 10               | 7                | 0              | 1.659086                | -1.852982 | 0.874890  |
| 11               | 6                | 0              | 3.208863                | -3.635032 | 1.123520  |
| 12               | 1                | 0              | 3.113594                | -4.458058 | 0.406469  |
| 13               | 7                | 0              | 3.774574                | -2.455485 | 0.434259  |
| 14               | 6                | 0              | 1.842635                | -3.114128 | 1.642716  |
| 15               | 1                | 0              | 1.949335                | -2.834659 | 2.701068  |
| 16               | 6                | 0              | 6.204156                | -2.203423 | 0.581002  |
| 17               | 1                | 0              | 6.089364                | -1.876502 | 1.610603  |
| 18               | 6                | 0              | 2.909853                | -0.172886 | -0.281521 |
| 19               | 6                | 0              | 3.839355                | 1.782235  | -1.368884 |
| 20               | 1                | 0              | 4.645987                | 2.243011  | -1.929982 |
| 21               | 6                | 0              | 5.069939                | -2.512604 | -0.177451 |
| 22               | 6                | 0              | 0.395135                | 5.285358  | -1.552759 |
| 23               | 1                | 0              | -0.272657               | 4.637781  | -2.114031 |
| 24               | 6                | 0              | 5.209931                | -2.941937 | -1.500925 |
| 25               | 1                | 0              | 4.329388                | -3.194737 | -2.084956 |
| 26               | 6                | 0              | 1.544100                | 5.829020  | 0.509977  |
| 27               | 1                | 0              | 1.772386                | 5.596029  | 1.545884  |
| 28               | 6                | 0              | 1.797625                | 0.610198  | 0.032326  |
| 29               | 6                | 0              | 3.950708                | 0.436417  | -1.002762 |
| 30               | 1                | 0              | 4.838018                | -0.120590 | -1.278737 |
| 31               | 6                | 0              | 2.727803                | 2.556284  | -1.018686 |
| 32               | 1                | 0              | 2.690139                | 3.601513  | -1.301775 |
| 33               | 6                | 0              | 1.678285                | 1.963675  | -0.297594 |
| 34               | 6                | 0              | 6.483143                | -3.044063 | -2.063080 |
| 35               | 1                | 0              | 6.584292                | -3.373627 | -3.093948 |
| 36               | 6                | 0              | 2.809184                | -1.526674 | 0.299016  |
| 37               | 6                | 0              | 2.099242                | 6.950665  | -0.101783 |
| 38               | 1                | 0              | 2.762822                | 7.594765  | 0.470034  |
| 39               | 6                | 0              | 0.961184                | 6.411069  | -2.154550 |
| 40               | 1                | 0              | 0.728813                | 6.633402  | -3.192763 |
| 41               | 6                | 0              | 7.632434                | -2.736415 | -1.320617 |

|    |   |   |            |            |            |
|----|---|---|------------|------------|------------|
| 42 | 6 | 0 | 1. 820863  | 7. 259938  | -1. 443640 |
| 43 | 6 | 0 | 7. 470125  | -2. 312567 | 0. 008250  |
| 44 | 1 | 0 | 8. 346631  | -2. 065539 | 0. 602136  |
| 45 | 6 | 0 | 9. 009738  | -2. 882214 | -1. 920747 |
| 46 | 1 | 0 | 9. 661066  | -2. 048570 | -1. 635114 |
| 47 | 1 | 0 | 8. 967788  | -2. 926745 | -3. 013668 |
| 48 | 1 | 0 | 9. 494692  | -3. 803265 | -1. 570863 |
| 49 | 6 | 0 | 2. 433812  | 8. 475936  | -2. 094625 |
| 50 | 1 | 0 | 2. 146347  | 9. 394614  | -1. 568276 |
| 51 | 1 | 0 | 2. 118767  | 8. 572064  | -3. 138116 |
| 52 | 1 | 0 | 3. 529789  | 8. 426886  | -2. 074694 |
| 53 | 1 | 0 | 3. 871489  | -3. 952485 | 1. 931031  |
| 54 | 1 | 0 | -1. 979458 | 4. 167995  | 0. 487718  |
| 55 | 6 | 0 | -1. 024588 | 2. 352779  | 3. 296576  |
| 56 | 6 | 0 | 0. 668627  | -4. 123169 | 1. 556152  |
| 57 | 6 | 0 | 1. 069665  | -5. 398864 | 2. 324584  |
| 58 | 1 | 0 | 0. 227350  | -6. 100013 | 2. 354050  |
| 59 | 1 | 0 | 1. 911110  | -5. 916995 | 1. 850010  |
| 60 | 1 | 0 | 1. 350040  | -5. 169957 | 3. 360531  |
| 61 | 6 | 0 | -0. 558282 | -3. 502059 | 2. 250535  |
| 62 | 1 | 0 | -0. 354404 | -3. 325088 | 3. 314668  |
| 63 | 1 | 0 | -0. 844333 | -2. 545037 | 1. 798724  |
| 64 | 1 | 0 | -1. 423418 | -4. 171574 | 2. 183221  |
| 65 | 6 | 0 | 0. 337584  | -4. 482723 | 0. 097933  |
| 66 | 1 | 0 | 0. 082249  | -3. 594583 | -0. 488235 |
| 67 | 1 | 0 | 1. 176756  | -4. 983887 | -0. 398566 |
| 68 | 1 | 0 | -0. 516669 | -5. 167644 | 0. 063065  |
| 69 | 6 | 0 | -1. 079901 | 0. 870756  | 3. 727022  |
| 70 | 1 | 0 | -1. 987533 | 0. 371618  | 3. 366876  |
| 71 | 1 | 0 | -0. 203696 | 0. 288169  | 3. 388474  |
| 72 | 1 | 0 | -1. 076788 | 0. 802073  | 4. 821504  |
| 73 | 6 | 0 | -2. 149251 | 3. 104739  | 4. 039191  |
| 74 | 1 | 0 | -2. 169078 | 4. 170893  | 3. 786146  |
| 75 | 1 | 0 | -3. 134371 | 2. 683043  | 3. 803912  |
| 76 | 1 | 0 | -2. 002697 | 3. 028618  | 5. 122483  |
| 77 | 6 | 0 | 0. 340250  | 2. 940229  | 3. 697241  |
| 78 | 1 | 0 | 0. 398477  | 4. 017760  | 3. 507589  |
| 79 | 1 | 0 | 0. 509799  | 2. 790282  | 4. 770087  |
| 80 | 1 | 0 | 1. 166329  | 2. 453210  | 3. 164885  |
| 81 | 8 | 0 | -0. 343158 | -0. 682489 | -0. 921683 |
| 82 | 8 | 0 | -2. 476630 | -0. 876593 | 0. 709737  |
| 83 | 6 | 0 | -1. 455197 | -0. 960107 | -1. 408704 |
| 84 | 6 | 0 | -2. 786847 | -1. 018723 | -0. 651839 |
| 85 | 8 | 0 | -1. 576998 | -1. 217007 | -2. 676721 |

|     |   |   |           |           |           |
|-----|---|---|-----------|-----------|-----------|
| 86  | 6 | 0 | -0.386884 | -1.187688 | -3.527879 |
| 87  | 1 | 0 | -0.754735 | -1.448963 | -4.517781 |
| 88  | 1 | 0 | 0.037816  | -0.182853 | -3.517016 |
| 89  | 1 | 0 | 0.333621  | -1.923623 | -3.168775 |
| 90  | 6 | 0 | -3.404311 | -2.435546 | -0.848084 |
| 91  | 9 | 0 | -3.939860 | -2.602865 | -2.066067 |
| 92  | 9 | 0 | -4.358078 | -2.649893 | 0.070915  |
| 93  | 9 | 0 | -2.457990 | -3.385766 | -0.680452 |
| 94  | 6 | 0 | -8.293760 | -1.622422 | -0.291192 |
| 95  | 6 | 0 | -7.122408 | -0.974661 | 0.097960  |
| 96  | 6 | 0 | -6.226359 | -0.463884 | -0.859274 |
| 97  | 6 | 0 | -6.534598 | -0.639160 | -2.219551 |
| 98  | 6 | 0 | -7.710000 | -1.284038 | -2.608670 |
| 99  | 6 | 0 | -8.594386 | -1.777605 | -1.647503 |
| 100 | 1 | 0 | -8.968101 | -2.014387 | 0.465474  |
| 101 | 1 | 0 | -6.885797 | -0.878945 | 1.153800  |
| 102 | 1 | 0 | -5.870145 | -0.249712 | -2.985097 |
| 103 | 1 | 0 | -7.934261 | -1.397162 | -3.665966 |
| 104 | 1 | 0 | -9.506060 | -2.284486 | -1.951555 |
| 105 | 6 | 0 | -5.011118 | 0.286823  | -0.429797 |
| 106 | 6 | 0 | -5.048273 | 1.125749  | 0.621586  |
| 107 | 1 | 0 | -4.182089 | 1.715474  | 0.908432  |
| 108 | 1 | 0 | -5.959520 | 1.298831  | 1.186590  |
| 109 | 1 | 0 | -3.260112 | -0.509688 | 1.170121  |
| 110 | 6 | 0 | -3.706446 | 0.123705  | -1.196640 |
| 111 | 1 | 0 | -3.119701 | 1.044026  | -1.115293 |
| 112 | 1 | 0 | -3.879484 | -0.059485 | -2.258348 |

---

**M3R<sub>exo</sub>**

Total energy= -2678.05088870

Sum of electronic and zero-point Energies= -2677.117861

Sum of electronic and thermal Energies= -2677.061670

Sum of electronic and thermal Enthalpies= -2677.060726

Sum of electronic and thermal Free Energies= -2677.210046

---

| Center<br>Number | Atomic<br>Number | Atomic<br>Type | Coordinates (Angstroms) |           |           |
|------------------|------------------|----------------|-------------------------|-----------|-----------|
|                  |                  |                | X                       | Y         | Z         |
| 1                | 45               | 0              | -0.202237               | -0.066645 | -1.507537 |
| 2                | 6                | 0              | 2.980776                | 0.171036  | -2.280936 |
| 3                | 1                | 0              | 3.140488                | -0.910706 | -2.305261 |
| 4                | 7                | 0              | 3.357096                | 1.792414  | -0.580435 |
| 5                | 6                | 0              | 2.059873                | 1.449850  | -0.603038 |



|    |   |   |            |            |            |
|----|---|---|------------|------------|------------|
| 6  | 6 | 0 | 4. 012108  | 2. 782282  | 0. 224743  |
| 7  | 7 | 0 | 1. 786780  | 0. 466644  | -1. 454606 |
| 8  | 6 | 0 | 4. 105476  | 0. 865431  | -1. 464008 |
| 9  | 1 | 0 | 4. 809109  | 1. 427096  | -2. 080080 |
| 10 | 7 | 0 | -2. 322934 | 0. 110293  | -1. 293540 |
| 11 | 6 | 0 | -4. 654181 | 0. 620170  | -1. 472505 |
| 12 | 1 | 0 | -5. 386009 | 0. 010505  | -0. 934816 |
| 13 | 7 | 0 | -3. 935216 | 1. 474731  | -0. 508105 |
| 14 | 6 | 0 | -3. 520567 | -0. 222448 | -2. 125484 |
| 15 | 1 | 0 | -3. 321734 | 0. 167105  | -3. 132790 |
| 16 | 6 | 0 | -5. 164358 | 3. 525764  | 0. 018992  |
| 17 | 1 | 0 | -4. 992813 | 3. 871107  | -0. 996436 |
| 18 | 6 | 0 | -1. 540987 | 1. 803730  | 0. 227145  |
| 19 | 6 | 0 | -0. 380754 | 3. 434131  | 1. 595625  |
| 20 | 1 | 0 | -0. 419687 | 4. 229999  | 2. 332603  |
| 21 | 6 | 0 | -4. 647125 | 2. 291864  | 0. 429243  |
| 22 | 6 | 0 | 4. 157199  | 4. 085822  | -0. 256607 |
| 23 | 1 | 0 | 3. 744853  | 4. 351820  | -1. 225524 |
| 24 | 6 | 0 | -4. 871978 | 1. 836979  | 1. 732006  |
| 25 | 1 | 0 | -4. 483911 | 0. 870222  | 2. 040980  |
| 26 | 6 | 0 | 4. 546065  | 2. 429358  | 1. 469687  |
| 27 | 1 | 0 | 4. 434775  | 1. 413414  | 1. 838340  |
| 28 | 6 | 0 | -0. 292063 | 1. 412624  | -0. 253431 |
| 29 | 6 | 0 | -1. 576279 | 2. 842179  | 1. 174972  |
| 30 | 1 | 0 | -2. 514827 | 3. 193137  | 1. 584558  |
| 31 | 6 | 0 | 0. 860976  | 3. 042171  | 1. 085013  |
| 32 | 1 | 0 | 1. 762523  | 3. 539417  | 1. 422650  |
| 33 | 6 | 0 | 0. 913630  | 2. 012601  | 0. 132396  |
| 34 | 6 | 0 | -5. 590628 | 2. 631644  | 2. 627004  |
| 35 | 1 | 0 | -5. 755978 | 2. 275291  | 3. 640464  |
| 36 | 6 | 0 | -2. 641164 | 1. 106561  | -0. 472492 |
| 37 | 6 | 0 | 5. 212023  | 3. 388517  | 2. 230401  |
| 38 | 1 | 0 | 5. 619989  | 3. 110643  | 3. 199098  |
| 39 | 6 | 0 | 4. 825621  | 5. 036456  | 0. 516440  |
| 40 | 1 | 0 | 4. 930737  | 6. 050429  | 0. 139602  |
| 41 | 6 | 0 | -6. 108938 | 3. 875166  | 2. 239236  |
| 42 | 6 | 0 | 5. 364903  | 4. 706042  | 1. 767752  |
| 43 | 6 | 0 | -5. 886794 | 4. 304823  | 0. 920168  |
| 44 | 1 | 0 | -6. 281746 | 5. 264909  | 0. 597040  |
| 45 | 6 | 0 | -6. 885607 | 4. 736002  | 3. 205626  |
| 46 | 1 | 0 | -6. 993708 | 4. 247819  | 4. 179118  |
| 47 | 1 | 0 | -7. 890312 | 4. 954771  | 2. 823244  |
| 48 | 1 | 0 | -6. 388055 | 5. 701048  | 3. 364841  |
| 49 | 6 | 0 | 6. 106280  | 5. 728684  | 2. 593671  |

|    |   |   |            |            |            |
|----|---|---|------------|------------|------------|
| 50 | 1 | 0 | 5. 973671  | 6. 738690  | 2. 193577  |
| 51 | 1 | 0 | 7. 183097  | 5. 515043  | 2. 609547  |
| 52 | 1 | 0 | 5. 764111  | 5. 723957  | 3. 635036  |
| 53 | 1 | 0 | -5. 186669 | 1. 238939  | -2. 198395 |
| 54 | 1 | 0 | 4. 671432  | 0. 158274  | -0. 847115 |
| 55 | 6 | 0 | 2. 836896  | 0. 663124  | -3. 760602 |
| 56 | 6 | 0 | -3. 869852 | -1. 728517 | -2. 286746 |
| 57 | 6 | 0 | -5. 144559 | -1. 823414 | -3. 152673 |
| 58 | 1 | 0 | -5. 381617 | -2. 874663 | -3. 353174 |
| 59 | 1 | 0 | -6. 016442 | -1. 380074 | -2. 658033 |
| 60 | 1 | 0 | -5. 010387 | -1. 322083 | -4. 119695 |
| 61 | 6 | 0 | -2. 729014 | -2. 437162 | -3. 035678 |
| 62 | 1 | 0 | -2. 535175 | -1. 958620 | -4. 004914 |
| 63 | 1 | 0 | -1. 799855 | -2. 431460 | -2. 462837 |
| 64 | 1 | 0 | -2. 992785 | -3. 483662 | -3. 230355 |
| 65 | 6 | 0 | -4. 120424 | -2. 412772 | -0. 931088 |
| 66 | 1 | 0 | -3. 264876 | -2. 308834 | -0. 258125 |
| 67 | 1 | 0 | -5. 002425 | -2. 007331 | -0. 422013 |
| 68 | 1 | 0 | -4. 299360 | -3. 483928 | -1. 080303 |
| 69 | 6 | 0 | 1. 585839  | 0. 035022  | -4. 402110 |
| 70 | 1 | 0 | 1. 595900  | -1. 057569 | -4. 334755 |
| 71 | 1 | 0 | 0. 658944  | 0. 395896  | -3. 928672 |
| 72 | 1 | 0 | 1. 528426  | 0. 310006  | -5. 461816 |
| 73 | 6 | 0 | 4. 077490  | 0. 182018  | -4. 540442 |
| 74 | 1 | 0 | 5. 006623  | 0. 601788  | -4. 137507 |
| 75 | 1 | 0 | 4. 162890  | -0. 911543 | -4. 518364 |
| 76 | 1 | 0 | 4. 006540  | 0. 491105  | -5. 589572 |
| 77 | 6 | 0 | 2. 724451  | 2. 195888  | -3. 856657 |
| 78 | 1 | 0 | 3. 622769  | 2. 705672  | -3. 491198 |
| 79 | 1 | 0 | 2. 590132  | 2. 491525  | -4. 903774 |
| 80 | 1 | 0 | 1. 860114  | 2. 574858  | -3. 297710 |
| 81 | 8 | 0 | 0. 596128  | -2. 331891 | -2. 276290 |
| 82 | 8 | 0 | -0. 008663 | -1. 347123 | 0. 116660  |
| 83 | 6 | 0 | 0. 907293  | -3. 038763 | -1. 331417 |
| 84 | 6 | 0 | 0. 644062  | -2. 643474 | 0. 129747  |
| 85 | 8 | 0 | 1. 481198  | -4. 216111 | -1. 410448 |
| 86 | 6 | 0 | 1. 728951  | -4. 756060 | -2. 743330 |
| 87 | 1 | 0 | 2. 177707  | -5. 732015 | -2. 568226 |
| 88 | 1 | 0 | 0. 783347  | -4. 851232 | -3. 279626 |
| 89 | 1 | 0 | 2. 416548  | -4. 101953 | -3. 282128 |
| 90 | 6 | 0 | -0. 416335 | -3. 624679 | 0. 710205  |
| 91 | 9 | 0 | -1. 361886 | -3. 886333 | -0. 216830 |
| 92 | 9 | 0 | -1. 026605 | -3. 090851 | 1. 778366  |
| 93 | 9 | 0 | 0. 141737  | -4. 787010 | 1. 065359  |

|     |   |   |           |           |          |
|-----|---|---|-----------|-----------|----------|
| 94  | 6 | 0 | 0.466587  | -3.561138 | 5.606206 |
| 95  | 6 | 0 | 0.686670  | -2.689928 | 4.540867 |
| 96  | 6 | 0 | 1.528073  | -3.053237 | 3.472799 |
| 97  | 6 | 0 | 2.131685  | -4.322716 | 3.501902 |
| 98  | 6 | 0 | 1.914943  | -5.192109 | 4.572080 |
| 99  | 6 | 0 | 1.082234  | -4.815992 | 5.627762 |
| 100 | 1 | 0 | -0.193603 | -3.263421 | 6.416288 |
| 101 | 1 | 0 | 0.184916  | -1.726808 | 4.522985 |
| 102 | 1 | 0 | 2.794181  | -4.633026 | 2.699532 |
| 103 | 1 | 0 | 2.399989  | -6.164322 | 4.578627 |
| 104 | 1 | 0 | 0.908285  | -5.496625 | 6.456532 |
| 105 | 6 | 0 | 1.804195  | -2.091099 | 2.368104 |
| 106 | 6 | 0 | 1.925705  | -0.770226 | 2.602342 |
| 107 | 1 | 0 | 1.838318  | -0.355358 | 3.602043 |
| 108 | 1 | 0 | 2.184813  | -0.073810 | 1.811178 |
| 109 | 1 | 0 | 0.210677  | -0.876835 | 0.958539 |
| 110 | 6 | 0 | 1.965246  | -2.601264 | 0.942168 |
| 111 | 1 | 0 | 2.646646  | -1.949045 | 0.387394 |
| 112 | 1 | 0 | 2.389614  | -3.606029 | 0.913639 |

**M3S<sub>exo</sub>**

Total energy= -2678.05561456

Sum of electronic and zero-point Energies= -2677.123531

Sum of electronic and thermal Energies= -2677.067211

Sum of electronic and thermal Enthalpies= -2677.066267

Sum of electronic and thermal Free Energies= -2677.215867

| Center<br>Number | Atomic<br>Number | Atomic<br>Type | Coordinates (Angstroms) |           |           |
|------------------|------------------|----------------|-------------------------|-----------|-----------|
|                  |                  |                | X                       | Y         | Z         |
| 1                | 45               | 0              | -0.163962               | -0.556979 | -1.431070 |
| 2                | 6                | 0              | 3.043976                | -0.506038 | -2.203539 |
| 3                | 1                | 0              | 3.195688                | -1.543717 | -1.897451 |
| 4                | 7                | 0              | 3.379009                | 1.508808  | -0.978476 |
| 5                | 6                | 0              | 2.080928                | 1.171455  | -0.954274 |
| 6                | 6                | 0              | 4.021071                | 2.622336  | -0.343063 |
| 7                | 7                | 0              | 1.819893                | 0.015286  | -1.555578 |
| 8                | 6                | 0              | 4.149487                | 0.402407  | -1.594733 |
| 9                | 1                | 0              | 4.839162                | 0.802697  | -2.340152 |
| 10               | 7                | 0              | -2.270059               | -0.366144 | -1.285909 |
| 11               | 6                | 0              | -4.621480               | -0.112436 | -1.358731 |
| 12               | 1                | 0              | -5.081477               | -0.655104 | -0.522822 |
| 13               | 7                | 0              | -3.931784               | 1.085600  | -0.841806 |

|    |   |   |           |           |           |
|----|---|---|-----------|-----------|-----------|
| 14 | 6 | 0 | -3.466015 | -0.892532 | -2.023926 |
| 15 | 1 | 0 | -3.368776 | -0.531309 | -3.059165 |
| 16 | 6 | 0 | -5.052019 | 3.257599  | -0.978480 |
| 17 | 1 | 0 | -4.781266 | 3.308539  | -2.029191 |
| 18 | 6 | 0 | -1.534763 | 1.714627  | -0.320546 |
| 19 | 6 | 0 | -0.407724 | 3.650301  | 0.600923  |
| 20 | 1 | 0 | -0.460742 | 4.608300  | 1.108016  |
| 21 | 6 | 0 | -4.656127 | 2.154240  | -0.215630 |
| 22 | 6 | 0 | 4.300033  | 3.779628  | -1.074531 |
| 23 | 1 | 0 | 4.002800  | 3.844023  | -2.117080 |
| 24 | 6 | 0 | -5.006832 | 2.074604  | 1.135338  |
| 25 | 1 | 0 | -4.707667 | 1.212049  | 1.724351  |
| 26 | 6 | 0 | 4.402770  | 2.531242  | 1.000360  |
| 27 | 1 | 0 | 4.188251  | 1.626717  | 1.562766  |
| 28 | 6 | 0 | -0.276522 | 1.229400  | -0.677234 |
| 29 | 6 | 0 | -1.593278 | 2.959440  | 0.333095  |
| 30 | 1 | 0 | -2.540498 | 3.389723  | 0.634030  |
| 31 | 6 | 0 | 0.845414  | 3.146505  | 0.232049  |
| 32 | 1 | 0 | 1.739840  | 3.716701  | 0.453467  |
| 33 | 6 | 0 | 0.920424  | 1.907048  | -0.421189 |
| 34 | 6 | 0 | -5.736669 | 3.109862  | 1.721636  |
| 35 | 1 | 0 | -6.000727 | 3.044984  | 2.774064  |
| 36 | 6 | 0 | -2.614996 | 0.817133  | -0.773683 |
| 37 | 6 | 0 | 5.048903  | 3.606495  | 1.607678  |
| 38 | 1 | 0 | 5.335872  | 3.532540  | 2.653718  |
| 39 | 6 | 0 | 4.947635  | 4.848660  | -0.453578 |
| 40 | 1 | 0 | 5.155067  | 5.749911  | -1.024820 |
| 41 | 6 | 0 | -6.135058 | 4.229458  | 0.977161  |
| 42 | 6 | 0 | 5.333967  | 4.781140  | 0.893051  |
| 43 | 6 | 0 | -5.780345 | 4.284502  | -0.380680 |
| 44 | 1 | 0 | -6.077451 | 5.143864  | -0.976794 |
| 45 | 6 | 0 | -6.940682 | 5.339589  | 1.606522  |
| 46 | 1 | 0 | -6.944884 | 5.262714  | 2.698278  |
| 47 | 1 | 0 | -7.984176 | 5.308821  | 1.266473  |
| 48 | 1 | 0 | -6.544334 | 6.324359  | 1.333355  |
| 49 | 6 | 0 | 6.059236  | 5.927913  | 1.553852  |
| 50 | 1 | 0 | 5.905821  | 6.865494  | 1.010130  |
| 51 | 1 | 0 | 7.140765  | 5.739610  | 1.587693  |
| 52 | 1 | 0 | 5.724674  | 6.069662  | 2.587516  |
| 53 | 1 | 0 | -5.399618 | 0.174459  | -2.066863 |
| 54 | 1 | 0 | 4.730423  | -0.106894 | -0.818399 |
| 55 | 6 | 0 | 2.954661  | -0.491304 | -3.763902 |
| 56 | 6 | 0 | -3.671749 | -2.427846 | -2.105634 |
| 57 | 6 | 0 | -5.081763 | -2.681695 | -2.684036 |

|     |   |   |           |           |           |
|-----|---|---|-----------|-----------|-----------|
| 58  | 1 | 0 | -5.222725 | -3.754002 | -2.861270 |
| 59  | 1 | 0 | -5.874828 | -2.354639 | -2.002354 |
| 60  | 1 | 0 | -5.220875 | -2.166498 | -3.642672 |
| 61  | 6 | 0 | -2.645094 | -3.034372 | -3.080748 |
| 62  | 1 | 0 | -2.734245 | -2.581517 | -4.076474 |
| 63  | 1 | 0 | -1.618243 | -2.902545 | -2.731139 |
| 64  | 1 | 0 | -2.818391 | -4.111874 | -3.190523 |
| 65  | 6 | 0 | -3.553425 | -3.106635 | -0.732206 |
| 66  | 1 | 0 | -2.544999 | -2.996189 | -0.321662 |
| 67  | 1 | 0 | -4.266496 | -2.699251 | -0.005990 |
| 68  | 1 | 0 | -3.759903 | -4.179533 | -0.825725 |
| 69  | 6 | 0 | 1.736533  | -1.322327 | -4.203337 |
| 70  | 1 | 0 | 1.786188  | -2.348599 | -3.822279 |
| 71  | 1 | 0 | 0.796910  | -0.873817 | -3.845177 |
| 72  | 1 | 0 | 1.677690  | -1.367409 | -5.297170 |
| 73  | 6 | 0 | 4.230966  | -1.155765 | -4.317359 |
| 74  | 1 | 0 | 5.135823  | -0.602878 | -4.039152 |
| 75  | 1 | 0 | 4.336661  | -2.183153 | -3.947077 |
| 76  | 1 | 0 | 4.193749  | -1.195293 | -5.412103 |
| 77  | 6 | 0 | 2.820809  | 0.934996  | -4.326748 |
| 78  | 1 | 0 | 3.687410  | 1.561443  | -4.085818 |
| 79  | 1 | 0 | 2.742074  | 0.898977  | -5.419614 |
| 80  | 1 | 0 | 1.920862  | 1.435522  | -3.949906 |
| 81  | 8 | 0 | 0.306277  | -2.941519 | -1.490759 |
| 82  | 8 | 0 | 0.041606  | -1.230267 | 0.503937  |
| 83  | 6 | 0 | 0.612783  | -3.382699 | -0.391163 |
| 84  | 6 | 0 | 0.530220  | -2.533652 | 0.888056  |
| 85  | 8 | 0 | 1.032534  | -4.598134 | -0.144604 |
| 86  | 6 | 0 | 1.158774  | -5.513619 | -1.275568 |
| 87  | 1 | 0 | 1.534697  | -6.438245 | -0.842075 |
| 88  | 1 | 0 | 0.179014  | -5.665585 | -1.731732 |
| 89  | 1 | 0 | 1.865748  | -5.105458 | -1.999699 |
| 90  | 6 | 0 | 1.966003  | -2.314332 | 1.448865  |
| 91  | 9 | 0 | 2.388438  | -3.388569 | 2.126923  |
| 92  | 9 | 0 | 2.010939  | -1.245696 | 2.254790  |
| 93  | 9 | 0 | 2.840179  | -2.102765 | 0.438754  |
| 94  | 6 | 0 | 0.588279  | -0.598074 | 6.059439  |
| 95  | 6 | 0 | -0.101579 | -0.780570 | 4.862456  |
| 96  | 6 | 0 | -0.147437 | -2.042565 | 4.241023  |
| 97  | 6 | 0 | 0.528780  | -3.113310 | 4.851900  |
| 98  | 6 | 0 | 1.212851  | -2.930345 | 6.054800  |
| 99  | 6 | 0 | 1.246505  | -1.673935 | 6.662698  |
| 100 | 1 | 0 | 0.617523  | 0.386422  | 6.518304  |
| 101 | 1 | 0 | -0.596121 | 0.064815  | 4.391991  |

|     |   |   |           |           |          |
|-----|---|---|-----------|-----------|----------|
| 102 | 1 | 0 | 0.505855  | -4.102811 | 4.405487 |
| 103 | 1 | 0 | 1.718711  | -3.773807 | 6.516553 |
| 104 | 1 | 0 | 1.785437  | -1.531824 | 7.595316 |
| 105 | 6 | 0 | -0.935770 | -2.237784 | 2.992574 |
| 106 | 6 | 0 | -2.097911 | -1.586250 | 2.781761 |
| 107 | 1 | 0 | -2.699582 | -1.775109 | 1.895697 |
| 108 | 1 | 0 | -2.515327 | -0.909777 | 3.521594 |
| 109 | 1 | 0 | -0.684655 | -0.958065 | 1.121013 |
| 110 | 6 | 0 | -0.443143 | -3.190468 | 1.912412 |
| 111 | 1 | 0 | -1.300449 | -3.550971 | 1.339753 |
| 112 | 1 | 0 | 0.061513  | -4.066790 | 2.321735 |

---

**TS4R<sub>endo</sub>**

Imaginary frequency= -154.95

Total energy= -2678.04129539

Sum of electronic and zero-point Energies= -2677.111629

Sum of electronic and thermal Energies= -2677.055133

Sum of electronic and thermal Enthalpies= -2677.054189

Sum of electronic and thermal Free Energies= -2677.208537

---

| Center<br>Number | Atomic<br>Number | Atomic<br>Type | Coordinates (Angstroms) |           |           |
|------------------|------------------|----------------|-------------------------|-----------|-----------|
|                  |                  |                | X                       | Y         | Z         |
| 1                | 45               | 0              | 0.560508                | -0.278648 | 1.248926  |
| 2                | 6                | 0              | -1.511472               | 2.076450  | 1.992541  |
| 3                | 1                | 0              | -2.339325               | 1.463497  | 1.622847  |
| 4                | 7                | 0              | -0.341515               | 3.635115  | 0.632493  |
| 5                | 6                | 0              | 0.322654                | 2.487986  | 0.634008  |
| 6                | 6                | 0              | 0.002621                | 4.855348  | -0.045803 |
| 7                | 7                | 0              | -0.281287               | 1.528021  | 1.391330  |
| 8                | 6                | 0              | -1.591521               | 3.511731  | 1.415940  |
| 9                | 1                | 0              | -1.613426               | 4.296276  | 2.175477  |
| 10               | 7                | 0              | 2.027025                | -1.704826 | 1.034367  |
| 11               | 6                | 0              | 3.709531                | -3.375204 | 1.029853  |
| 12               | 1                | 0              | 3.571016                | -4.167159 | 0.286202  |
| 13               | 7                | 0              | 4.114798                | -2.132717 | 0.337623  |
| 14               | 6                | 0              | 2.389706                | -2.961652 | 1.728753  |
| 15               | 1                | 0              | 2.611458                | -2.696305 | 2.774131  |
| 16               | 6                | 0              | 6.526371                | -1.734399 | 0.299364  |
| 17               | 1                | 0              | 6.494424                | -1.537899 | 1.367144  |
| 18               | 6                | 0              | 3.036600                | 0.118479  | -0.145489 |
| 19               | 6                | 0              | 3.670879                | 2.206442  | -1.205359 |
| 20               | 1                | 0              | 4.388885                | 2.776377  | -1.786121 |

|    |   |   |           |           |           |
|----|---|---|-----------|-----------|-----------|
| 21 | 6 | 0 | 5.349364  | -2.040942 | -0.387598 |
| 22 | 6 | 0 | -0.415519 | 5.052489  | -1.364976 |
| 23 | 1 | 0 | -0.973411 | 4.276032  | -1.879663 |
| 24 | 6 | 0 | 5.381721  | -2.304537 | -1.761402 |
| 25 | 1 | 0 | 4.465758  | -2.558784 | -2.286652 |
| 26 | 6 | 0 | 0.710525  | 5.846399  | 0.636015  |
| 27 | 1 | 0 | 1.023802  | 5.683468  | 1.662890  |
| 28 | 6 | 0 | 1.853850  | 0.745794  | 0.258469  |
| 29 | 6 | 0 | 3.954559  | 0.868802  | -0.901096 |
| 30 | 1 | 0 | 4.877283  | 0.426724  | -1.258672 |
| 31 | 6 | 0 | 2.500590  | 2.831515  | -0.766955 |
| 32 | 1 | 0 | 2.330970  | 3.878737  | -0.993430 |
| 33 | 6 | 0 | 1.571680  | 2.090958  | -0.015075 |
| 34 | 6 | 0 | 6.595233  | -2.240198 | -2.443956 |
| 35 | 1 | 0 | 6.615732  | -2.445387 | -3.511432 |
| 36 | 6 | 0 | 3.103543  | -1.257377 | 0.368074  |
| 37 | 6 | 0 | 1.012323  | 7.040678  | -0.019440 |
| 38 | 1 | 0 | 1.568546  | 7.810849  | 0.508132  |
| 39 | 6 | 0 | -0.105123 | 6.251366  | -2.003958 |
| 40 | 1 | 0 | -0.424609 | 6.403788  | -3.031611 |
| 41 | 6 | 0 | 7.790159  | -1.926227 | -1.776429 |
| 42 | 6 | 0 | 0.610492  | 7.264064  | -1.344067 |
| 43 | 6 | 0 | 7.734089  | -1.679921 | -0.397254 |
| 44 | 1 | 0 | 8.647394  | -1.440855 | 0.141938  |
| 45 | 6 | 0 | 9.094474  | -1.846963 | -2.530306 |
| 46 | 1 | 0 | 9.950499  | -1.834044 | -1.848668 |
| 47 | 1 | 0 | 9.141704  | -0.934158 | -3.140392 |
| 48 | 1 | 0 | 9.211850  | -2.695167 | -3.214228 |
| 49 | 6 | 0 | 0.918455  | 8.566588  | -2.039890 |
| 50 | 1 | 0 | 0.029047  | 9.209305  | -2.080266 |
| 51 | 1 | 0 | 1.241161  | 8.399395  | -3.073730 |
| 52 | 1 | 0 | 1.705085  | 9.122294  | -1.519070 |
| 53 | 1 | 0 | 4.489735  | -3.681662 | 1.728992  |
| 54 | 1 | 0 | -2.442723 | 3.654184  | 0.743448  |
| 55 | 6 | 0 | -1.528001 | 1.974773  | 3.555926  |
| 56 | 6 | 0 | 1.269726  | -4.034920 | 1.758479  |
| 57 | 6 | 0 | 1.822483  | -5.286009 | 2.469032  |
| 58 | 1 | 0 | 1.037513  | -6.045350 | 2.561992  |
| 59 | 1 | 0 | 2.652286  | -5.739112 | 1.912438  |
| 60 | 1 | 0 | 2.180571  | -5.048502 | 3.478911  |
| 61 | 6 | 0 | 0.086046  | -3.487119 | 2.578545  |
| 62 | 1 | 0 | 0.398412  | -3.217254 | 3.595003  |
| 63 | 1 | 0 | -0.361510 | -2.597732 | 2.111771  |
| 64 | 1 | 0 | -0.703138 | -4.244341 | 2.661857  |

|     |   |   |           |           |           |
|-----|---|---|-----------|-----------|-----------|
| 65  | 6 | 0 | 0.793935  | -4.406517 | 0.342403  |
| 66  | 1 | 0 | 0.459678  | -3.518631 | -0.203936 |
| 67  | 1 | 0 | 1.583200  | -4.888755 | -0.245139 |
| 68  | 1 | 0 | -0.043352 | -5.112452 | 0.402472  |
| 69  | 6 | 0 | -1.401105 | 0.496625  | 3.964787  |
| 70  | 1 | 0 | -2.196927 | -0.113422 | 3.521345  |
| 71  | 1 | 0 | -0.430363 | 0.071682  | 3.665147  |
| 72  | 1 | 0 | -1.469560 | 0.398689  | 5.054571  |
| 73  | 6 | 0 | -2.890265 | 2.508209  | 4.044777  |
| 74  | 1 | 0 | -3.028371 | 3.569298  | 3.804878  |
| 75  | 1 | 0 | -3.720599 | 1.949100  | 3.597765  |
| 76  | 1 | 0 | -2.962069 | 2.405278  | 5.133569  |
| 77  | 6 | 0 | -0.385071 | 2.778744  | 4.198642  |
| 78  | 1 | 0 | -0.445310 | 3.848159  | 3.968153  |
| 79  | 1 | 0 | -0.430059 | 2.678953  | 5.289500  |
| 80  | 1 | 0 | 0.597908  | 2.415001  | 3.875775  |
| 81  | 8 | 0 | -0.166179 | -1.142562 | -1.125384 |
| 82  | 8 | 0 | -2.354804 | -1.075508 | 0.404077  |
| 83  | 6 | 0 | -1.249829 | -1.233100 | -1.684505 |
| 84  | 6 | 0 | -2.612697 | -1.251246 | -0.964193 |
| 85  | 8 | 0 | -1.397211 | -1.353609 | -2.991884 |
| 86  | 6 | 0 | -0.196284 | -1.348571 | -3.808692 |
| 87  | 1 | 0 | -0.553797 | -1.446631 | -4.833918 |
| 88  | 1 | 0 | 0.340947  | -0.408009 | -3.675911 |
| 89  | 1 | 0 | 0.440256  | -2.194933 | -3.540782 |
| 90  | 6 | 0 | -3.440155 | -0.024635 | -1.432575 |
| 91  | 9 | 0 | -2.680848 | 1.099081  | -1.386178 |
| 92  | 9 | 0 | -4.488666 | 0.176602  | -0.613334 |
| 93  | 9 | 0 | -3.906060 | -0.144663 | -2.685601 |
| 94  | 6 | 0 | -8.132825 | -1.724350 | -0.358200 |
| 95  | 6 | 0 | -6.845103 | -2.060220 | 0.056991  |
| 96  | 6 | 0 | -5.878823 | -2.504730 | -0.865686 |
| 97  | 6 | 0 | -6.244694 | -2.584954 | -2.221022 |
| 98  | 6 | 0 | -7.536509 | -2.254127 | -2.635671 |
| 99  | 6 | 0 | -8.485794 | -1.821319 | -1.706619 |
| 100 | 1 | 0 | -8.858471 | -1.375508 | 0.372223  |
| 101 | 1 | 0 | -6.576082 | -1.958626 | 1.104805  |
| 102 | 1 | 0 | -5.530504 | -2.933215 | -2.960317 |
| 103 | 1 | 0 | -7.799128 | -2.335182 | -3.686570 |
| 104 | 1 | 0 | -9.488745 | -1.557153 | -2.031360 |
| 105 | 6 | 0 | -4.519069 | -2.908293 | -0.405516 |
| 106 | 6 | 0 | -4.331736 | -3.528822 | 0.775942  |
| 107 | 1 | 0 | -3.091270 | -1.488071 | 0.901265  |
| 108 | 1 | 0 | -5.161987 | -3.780887 | 1.429389  |



|     |   |   |           |           |           |
|-----|---|---|-----------|-----------|-----------|
| 109 | 1 | 0 | -3.345514 | -3.854385 | 1.095659  |
| 110 | 6 | 0 | -3.308664 | -2.615607 | -1.277494 |
| 111 | 1 | 0 | -2.551933 | -3.386561 | -1.103842 |
| 112 | 1 | 0 | -3.551331 | -2.635558 | -2.340670 |

---

**TS4S<sub>endo</sub>**

Imaginary frequency= -164.29

Total energy= -2678.03868729

Sum of electronic and zero-point Energies= -2677.108720

Sum of electronic and thermal Energies= -2677.052307

Sum of electronic and thermal Enthalpies= -2677.051363

Sum of electronic and thermal Free Energies= -2677.203080

---

| Center<br>Number | Atomic<br>Number | Atomic<br>Type | Coordinates (Angstroms) |           |           |
|------------------|------------------|----------------|-------------------------|-----------|-----------|
|                  |                  |                | X                       | Y         | Z         |
| 1                | 45               | 0              | 0.582611                | -0.310076 | 1.108295  |
| 2                | 6                | 0              | -1.308215               | 2.205554  | 1.948291  |
| 3                | 1                | 0              | -2.246705               | 1.699000  | 1.707235  |
| 4                | 7                | 0              | -0.048803               | 3.710881  | 0.595056  |
| 5                | 6                | 0              | 0.493825                | 2.489738  | 0.538335  |
| 6                | 6                | 0              | 0.317735                | 4.876996  | -0.157791 |
| 7                | 7                | 0              | -0.222906               | 1.554202  | 1.176733  |
| 8                | 6                | 0              | -1.311552               | 3.646485  | 1.363866  |
| 9                | 1                | 0              | -1.323341               | 4.437831  | 2.115681  |
| 10               | 7                | 0              | 2.034292                | -1.688593 | 1.133783  |
| 11               | 6                | 0              | 3.636272                | -3.456107 | 1.179476  |
| 12               | 1                | 0              | 3.628193                | -4.331951 | 0.526211  |
| 13               | 7                | 0              | 4.068446                | -2.285142 | 0.389792  |
| 14               | 6                | 0              | 2.235359                | -3.041489 | 1.702158  |
| 15               | 1                | 0              | 2.271015                | -2.931832 | 2.791005  |
| 16               | 6                | 0              | 6.503274                | -2.044013 | 0.467609  |
| 17               | 1                | 0              | 6.439368                | -1.866234 | 1.537558  |
| 18               | 6                | 0              | 3.144879                | 0.014057  | -0.146293 |
| 19               | 6                | 0              | 3.929802                | 2.075523  | -1.137591 |
| 20               | 1                | 0              | 4.697354                | 2.627117  | -1.665513 |
| 21               | 6                | 0              | 5.340393                | -2.257585 | -0.279046 |
| 22               | 6                | 0              | 0.052851                | 4.932989  | -1.528722 |
| 23               | 1                | 0              | -0.410563               | 4.086529  | -2.024664 |
| 24               | 6                | 0              | 5.404755                | -2.485099 | -1.655028 |
| 25               | 1                | 0              | 4.492356                | -2.662817 | -2.221178 |
| 26               | 6                | 0              | 0.893865                | 5.971654  | 0.496796  |
| 27               | 1                | 0              | 1.094403                | 5.921868  | 1.562959  |

|    |   |   |           |           |           |
|----|---|---|-----------|-----------|-----------|
| 28 | 6 | 0 | 1.965495  | 0.679954  | 0.200947  |
| 29 | 6 | 0 | 4.146413  | 0.729044  | -0.830798 |
| 30 | 1 | 0 | 5.084466  | 0.262055  | -1.109674 |
| 31 | 6 | 0 | 2.757702  | 2.741085  | -0.751783 |
| 32 | 1 | 0 | 2.637912  | 3.791056  | -0.996702 |
| 33 | 6 | 0 | 1.757604  | 2.039320  | -0.059039 |
| 34 | 6 | 0 | 6.645709  | -2.478981 | -2.286945 |
| 35 | 1 | 0 | 6.696601  | -2.654358 | -3.358163 |
| 36 | 6 | 0 | 3.144029  | -1.335186 | 0.412826  |
| 37 | 6 | 0 | 1.209681  | 7.115555  | -0.234425 |
| 38 | 1 | 0 | 1.660808  | 7.962386  | 0.276769  |
| 39 | 6 | 0 | 0.381341  | 6.083870  | -2.245326 |
| 40 | 1 | 0 | 0.175758  | 6.123106  | -3.311883 |
| 41 | 6 | 0 | 7.831024  | -2.258141 | -1.568690 |
| 42 | 6 | 0 | 0.964278  | 7.190367  | -1.615688 |
| 43 | 6 | 0 | 7.735784  | -2.038808 | -0.184424 |
| 44 | 1 | 0 | 8.639388  | -1.861894 | 0.393361  |
| 45 | 6 | 0 | 9.172769  | -2.274949 | -2.252296 |
| 46 | 1 | 0 | 9.789221  | -1.423719 | -1.941072 |
| 47 | 1 | 0 | 9.068283  | -2.243553 | -3.341139 |
| 48 | 1 | 0 | 9.733692  | -3.185546 | -2.000585 |
| 49 | 6 | 0 | 1.323279  | 8.433833  | -2.390312 |
| 50 | 1 | 0 | 0.865044  | 9.325399  | -1.945429 |
| 51 | 1 | 0 | 0.992602  | 8.365773  | -3.431265 |
| 52 | 1 | 0 | 2.408211  | 8.599501  | -2.391873 |
| 53 | 1 | 0 | 4.354182  | -3.628675 | 1.987322  |
| 54 | 1 | 0 | -2.151092 | 3.804547  | 0.678581  |
| 55 | 6 | 0 | -1.125565 | 2.111617  | 3.497200  |
| 56 | 6 | 0 | 1.072410  | -4.032952 | 1.389400  |
| 57 | 6 | 0 | 1.416146  | -5.379585 | 2.062284  |
| 58 | 1 | 0 | 0.596158  | -6.089305 | 1.911839  |
| 59 | 1 | 0 | 2.326490  | -5.829422 | 1.646444  |
| 60 | 1 | 0 | 1.562675  | -5.258841 | 3.144689  |
| 61 | 6 | 0 | -0.230030 | -3.495050 | 2.015850  |
| 62 | 1 | 0 | -0.091092 | -3.263741 | 3.082548  |
| 63 | 1 | 0 | -0.601618 | -2.591046 | 1.506713  |
| 64 | 1 | 0 | -1.021229 | -4.251259 | 1.939566  |
| 65 | 6 | 0 | 0.869447  | -4.237084 | -0.123002 |
| 66 | 1 | 0 | 0.581201  | -3.305832 | -0.624694 |
| 67 | 1 | 0 | 1.768615  | -4.629025 | -0.613557 |
| 68 | 1 | 0 | 0.063950  | -4.957117 | -0.292499 |
| 69 | 6 | 0 | -1.160195 | 0.628373  | 3.916207  |
| 70 | 1 | 0 | -2.066529 | 0.129450  | 3.550101  |
| 71 | 1 | 0 | -0.289228 | 0.080724  | 3.532612  |

|     |   |   |           |           |           |
|-----|---|---|-----------|-----------|-----------|
| 72  | 1 | 0 | -1.149635 | 0.539074  | 5.008977  |
| 73  | 6 | 0 | -2.314864 | 2.827627  | 4.167692  |
| 74  | 1 | 0 | -2.342293 | 3.897893  | 3.935770  |
| 75  | 1 | 0 | -3.272087 | 2.388845  | 3.859460  |
| 76  | 1 | 0 | -2.240314 | 2.731359  | 5.257117  |
| 77  | 6 | 0 | 0.194908  | 2.749061  | 3.960876  |
| 78  | 1 | 0 | 0.243372  | 3.816969  | 3.717970  |
| 79  | 1 | 0 | 0.292098  | 2.658958  | 5.049171  |
| 80  | 1 | 0 | 1.063647  | 2.254561  | 3.512218  |
| 81  | 8 | 0 | -0.516810 | -0.450137 | -1.244065 |
| 82  | 8 | 0 | -2.485591 | -0.801478 | 0.516161  |
| 83  | 6 | 0 | -1.628797 | -0.705133 | -1.685161 |
| 84  | 6 | 0 | -2.877650 | -0.955520 | -0.824681 |
| 85  | 8 | 0 | -1.904663 | -0.809097 | -2.970921 |
| 86  | 6 | 0 | -0.818418 | -0.613667 | -3.915986 |
| 87  | 1 | 0 | -1.265372 | -0.766657 | -4.895931 |
| 88  | 1 | 0 | -0.426022 | 0.400971  | -3.825497 |
| 89  | 1 | 0 | -0.029203 | -1.346257 | -3.731010 |
| 90  | 6 | 0 | -3.308488 | -2.437438 | -1.020973 |
| 91  | 9 | 0 | -3.940454 | -2.644426 | -2.191424 |
| 92  | 9 | 0 | -4.133892 | -2.820713 | -0.030138 |
| 93  | 9 | 0 | -2.235591 | -3.262059 | -0.989587 |
| 94  | 6 | 0 | -8.221188 | -2.313717 | -0.093261 |
| 95  | 6 | 0 | -7.111361 | -1.541536 | 0.253902  |
| 96  | 6 | 0 | -6.378070 | -0.848487 | -0.725055 |
| 97  | 6 | 0 | -6.786850 | -0.960447 | -2.065613 |
| 98  | 6 | 0 | -7.901586 | -1.729237 | -2.412093 |
| 99  | 6 | 0 | -8.622920 | -2.406602 | -1.428717 |
| 100 | 1 | 0 | -8.766754 | -2.848933 | 0.682220  |
| 101 | 1 | 0 | -6.793408 | -1.495946 | 1.291476  |
| 102 | 1 | 0 | -6.255514 | -0.426371 | -2.848630 |
| 103 | 1 | 0 | -8.206369 | -1.791027 | -3.453729 |
| 104 | 1 | 0 | -9.486263 | -3.010754 | -1.697155 |
| 105 | 6 | 0 | -5.225142 | 0.014135  | -0.341890 |
| 106 | 6 | 0 | -5.246773 | 0.752509  | 0.783582  |
| 107 | 1 | 0 | -4.422317 | 1.413486  | 1.044861  |
| 108 | 1 | 0 | -6.109493 | 0.770651  | 1.444103  |
| 109 | 1 | 0 | -3.295348 | -0.678859 | 1.049055  |
| 110 | 6 | 0 | -3.993859 | 0.058804  | -1.234025 |
| 111 | 1 | 0 | -3.531107 | 1.048300  | -1.165136 |
| 112 | 1 | 0 | -4.239951 | -0.109966 | -2.282330 |

-----

**TS4R<sub>exo</sub>**

Imaginary frequency= -159.93  
 Total energy= -2678.03228089  
 Sum of electronic and zero-point Energies= -2677.102941  
 Sum of electronic and thermal Energies= -2677.046227  
 Sum of electronic and thermal Enthalpies= -2677.045283  
 Sum of electronic and thermal Free Energies= -2677.199219

---

| Center<br>Number | Atomic<br>Number | Atomic<br>Type | Coordinates (Angstroms) |           |           |
|------------------|------------------|----------------|-------------------------|-----------|-----------|
|                  |                  |                | X                       | Y         | Z         |
| 1                | 45               | 0              | 0.432017                | -0.221195 | -1.577515 |
| 2                | 6                | 0              | -2.403062               | -1.471538 | -2.580414 |
| 3                | 1                | 0              | -2.827784               | -0.513855 | -2.887953 |
| 4                | 7                | 0              | -2.673834               | -2.734408 | -0.579444 |
| 5                | 6                | 0              | -1.510630               | -2.064841 | -0.544201 |
| 6                | 6                | 0              | -3.237372               | -3.590299 | 0.427098  |
| 7                | 7                | 0              | -1.354010               | -1.224165 | -1.565246 |
| 8                | 6                | 0              | -3.449545               | -2.276109 | -1.754411 |
| 9                | 1                | 0              | -3.866478               | -3.139571 | -2.277808 |
| 10               | 7                | 0              | 2.456050                | 0.078178  | -1.215838 |
| 11               | 6                | 0              | 4.838585                | 0.185712  | -1.124586 |
| 12               | 1                | 0              | 5.357169                | 1.056504  | -0.716954 |
| 13               | 7                | 0              | 4.236333                | -0.569903 | -0.008683 |
| 14               | 6                | 0              | 3.621890                | 0.537557  | -2.016887 |
| 15               | 1                | 0              | 3.638681                | -0.085975 | -2.918975 |
| 16               | 6                | 0              | 5.898366                | -2.140694 | 0.853767  |
| 17               | 1                | 0              | 5.897510                | -2.645525 | -0.109478 |
| 18               | 6                | 0              | 1.907780                | -1.318042 | 0.656089  |
| 19               | 6                | 0              | 0.973088                | -2.862279 | 2.272088  |
| 20               | 1                | 0              | 1.086225                | -3.450530 | 3.175950  |
| 21               | 6                | 0              | 5.048340                | -1.051090 | 1.070341  |
| 22               | 6                | 0              | -2.999428               | -4.965796 | 0.392350  |
| 23               | 1                | 0              | -2.364293               | -5.386369 | -0.382408 |
| 24               | 6                | 0              | 5.044611                | -0.391295 | 2.303064  |
| 25               | 1                | 0              | 4.396527                | 0.469384  | 2.454985  |
| 26               | 6                | 0              | -4.065541               | -3.047678 | 1.419244  |
| 27               | 1                | 0              | -4.257720               | -1.978842 | 1.436784  |
| 28               | 6                | 0              | 0.678674                | -1.347217 | -0.007186 |
| 29               | 6                | 0              | 2.050871                | -2.095087 | 1.819843  |
| 30               | 1                | 0              | 2.985770                | -2.119075 | 2.364422  |
| 31               | 6                | 0              | -0.240388               | -2.909880 | 1.577052  |
| 32               | 1                | 0              | -1.050539               | -3.525454 | 1.947773  |
| 33               | 6                | 0              | -0.392807               | -2.149910 | 0.402690  |
| 34               | 6                | 0              | 5.879241                | -0.844949 | 3.324888  |

---

|    |   |   |           |           |           |
|----|---|---|-----------|-----------|-----------|
| 35 | 1 | 0 | 5.875107  | -0.329067 | 4.278681  |
| 36 | 6 | 0 | 2.905313  | -0.569136 | -0.123820 |
| 37 | 6 | 0 | -4.632833 | -3.882815 | 2.378077  |
| 38 | 1 | 0 | -5.269371 | -3.452986 | 3.148543  |
| 39 | 6 | 0 | -3.572972 | -5.791990 | 1.360506  |
| 40 | 1 | 0 | -3.378022 | -6.860720 | 1.333000  |
| 41 | 6 | 0 | 6.732675  | -1.940466 | 3.134515  |
| 42 | 6 | 0 | -4.396650 | -5.267610 | 2.366099  |
| 43 | 6 | 0 | 6.726953  | -2.580945 | 1.881957  |
| 44 | 1 | 0 | 7.380280  | -3.432361 | 1.712639  |
| 45 | 6 | 0 | 7.643763  | -2.426550 | 4.234759  |
| 46 | 1 | 0 | 7.552605  | -1.807779 | 5.133579  |
| 47 | 1 | 0 | 8.693132  | -2.408888 | 3.915651  |
| 48 | 1 | 0 | 7.410091  | -3.461083 | 4.513931  |
| 49 | 6 | 0 | -5.035517 | -6.161684 | 3.400634  |
| 50 | 1 | 0 | -4.620211 | -7.173481 | 3.368260  |
| 51 | 1 | 0 | -6.118043 | -6.239212 | 3.235084  |
| 52 | 1 | 0 | -4.895088 | -5.764214 | 4.413344  |
| 53 | 1 | 0 | 5.571986  | -0.442707 | -1.642922 |
| 54 | 1 | 0 | -4.273588 | -1.637114 | -1.416340 |
| 55 | 6 | 0 | -1.869751 | -2.184036 | -3.864597 |
| 56 | 6 | 0 | 3.570602  | 2.015877  | -2.500103 |
| 57 | 6 | 0 | 4.866210  | 2.298328  | -3.287740 |
| 58 | 1 | 0 | 4.833661  | 3.312053  | -3.707403 |
| 59 | 1 | 0 | 5.759989  | 2.238908  | -2.654092 |
| 60 | 1 | 0 | 4.993213  | 1.595341  | -4.119459 |
| 61 | 6 | 0 | 2.377162  | 2.188015  | -3.454938 |
| 62 | 1 | 0 | 2.446697  | 1.496748  | -4.305182 |
| 63 | 1 | 0 | 1.421856  | 2.019357  | -2.949681 |
| 64 | 1 | 0 | 2.359395  | 3.207883  | -3.856979 |
| 65 | 6 | 0 | 3.440864  | 2.995158  | -1.320380 |
| 66 | 1 | 0 | 2.563188  | 2.771726  | -0.707165 |
| 67 | 1 | 0 | 4.324149  | 2.981301  | -0.670599 |
| 68 | 1 | 0 | 3.336211  | 4.021824  | -1.696608 |
| 69 | 6 | 0 | -0.753681 | -1.332618 | -4.499764 |
| 70 | 1 | 0 | -1.067679 | -0.298151 | -4.663761 |
| 71 | 1 | 0 | 0.154099  | -1.319623 | -3.873399 |
| 72 | 1 | 0 | -0.468897 | -1.752874 | -5.471261 |
| 73 | 6 | 0 | -3.036710 | -2.282652 | -4.871880 |
| 74 | 1 | 0 | -3.867635 | -2.884686 | -4.486961 |
| 75 | 1 | 0 | -3.425630 | -1.288876 | -5.127375 |
| 76 | 1 | 0 | -2.691043 | -2.756328 | -5.799918 |
| 77 | 6 | 0 | -1.318530 | -3.589389 | -3.567025 |
| 78 | 1 | 0 | -2.085348 | -4.263521 | -3.167773 |

|     |   |   |           |           |           |
|-----|---|---|-----------|-----------|-----------|
| 79  | 1 | 0 | -0.938391 | -4.043368 | -4.490178 |
| 80  | 1 | 0 | -0.486210 | -3.554270 | -2.850981 |
| 81  | 8 | 0 | -0.978089 | 1.861713  | -2.467317 |
| 82  | 8 | 0 | -0.489163 | 1.513450  | 0.072764  |
| 83  | 6 | 0 | -1.593729 | 2.599108  | -1.717146 |
| 84  | 6 | 0 | -1.413816 | 2.563277  | -0.194575 |
| 85  | 8 | 0 | -2.443459 | 3.532792  | -2.090853 |
| 86  | 6 | 0 | -2.656431 | 3.711077  | -3.520563 |
| 87  | 1 | 0 | -3.371010 | 4.531746  | -3.597638 |
| 88  | 1 | 0 | -1.711764 | 3.970368  | -4.005300 |
| 89  | 1 | 0 | -3.071632 | 2.795833  | -3.947867 |
| 90  | 6 | 0 | -0.714990 | 3.894411  | 0.213920  |
| 91  | 9 | 0 | 0.242815  | 4.217609  | -0.687261 |
| 92  | 9 | 0 | -0.118949 | 3.775763  | 1.410510  |
| 93  | 9 | 0 | -1.576160 | 4.922180  | 0.266893  |
| 94  | 6 | 0 | -1.981702 | 4.376031  | 4.984228  |
| 95  | 6 | 0 | -1.903080 | 3.315794  | 4.084241  |
| 96  | 6 | 0 | -2.728660 | 3.267817  | 2.944588  |
| 97  | 6 | 0 | -3.633694 | 4.323849  | 2.734842  |
| 98  | 6 | 0 | -3.717225 | 5.383368  | 3.640800  |
| 99  | 6 | 0 | -2.893633 | 5.415525  | 4.765207  |
| 100 | 1 | 0 | -1.326702 | 4.398396  | 5.849909  |
| 101 | 1 | 0 | -1.177885 | 2.522126  | 4.249965  |
| 102 | 1 | 0 | -4.295905 | 4.313628  | 1.875279  |
| 103 | 1 | 0 | -4.431072 | 6.183855  | 3.462324  |
| 104 | 1 | 0 | -2.952871 | 6.244159  | 5.466052  |
| 105 | 6 | 0 | -2.663974 | 2.106109  | 2.012181  |
| 106 | 6 | 0 | -2.491527 | 0.849364  | 2.463084  |
| 107 | 1 | 0 | -2.412786 | 0.626908  | 3.522812  |
| 108 | 1 | 0 | -2.486901 | -0.001246 | 1.786219  |
| 109 | 1 | 0 | -0.630900 | 1.221840  | 1.000189  |
| 110 | 6 | 0 | -2.780826 | 2.341840  | 0.511914  |
| 111 | 1 | 0 | -3.227652 | 1.458547  | 0.043219  |
| 112 | 1 | 0 | -3.422441 | 3.191822  | 0.279372  |

---

**TS4S<sub>exo</sub>**

Imaginary frequency= -119.04

Total energy= -2678.03827686

Sum of electronic and zero-point Energies= -2677.108629

Sum of electronic and thermal Energies= -2677.052404

Sum of electronic and thermal Enthalpies= -2677.051460

Sum of electronic and thermal Free Energies= -2677.201300

---

| Center<br>Number | Atomic<br>Number | Atomic<br>Type | Coordinates (Angstroms) |           |           |
|------------------|------------------|----------------|-------------------------|-----------|-----------|
|                  |                  |                | X                       | Y         | Z         |
| 1                | 45               | 0              | 0.002234                | -0.329018 | -1.419985 |
| 2                | 6                | 0              | -3.137128               | -0.532055 | -2.125389 |
| 3                | 1                | 0              | -3.217807               | 0.555974  | -2.215999 |
| 4                | 7                | 0              | -3.578461               | -1.724062 | -0.115412 |
| 5                | 6                | 0              | -2.274623               | -1.546224 | -0.219862 |
| 6                | 6                | 0              | -4.286446               | -2.396500 | 0.942082  |
| 7                | 7                | 0              | -1.925498               | -0.811062 | -1.327311 |
| 8                | 6                | 0              | -4.288896               | -1.079247 | -1.242296 |
| 9                | 1                | 0              | -4.918823               | -1.824259 | -1.732963 |
| 10               | 7                | 0              | 2.019392                | -0.696245 | -1.351969 |
| 11               | 6                | 0              | 4.321565                | -1.235771 | -1.494246 |
| 12               | 1                | 0              | 4.937795                | -0.413377 | -1.113534 |
| 13               | 7                | 0              | 3.645066                | -1.895973 | -0.362520 |
| 14               | 6                | 0              | 3.129739                | -0.748497 | -2.351131 |
| 15               | 1                | 0              | 2.865963                | -1.554141 | -3.054463 |
| 16               | 6                | 0              | 4.567662                | -4.014838 | 0.441563  |
| 17               | 1                | 0              | 4.148024                | -4.507740 | -0.430565 |
| 18               | 6                | 0              | 1.287417                | -1.991682 | 0.538980  |
| 19               | 6                | 0              | 0.106865                | -3.210673 | 2.269205  |
| 20               | 1                | 0              | 0.134336                | -3.844216 | 3.149493  |
| 21               | 6                | 0              | 4.370499                | -2.642621 | 0.626818  |
| 22               | 6                | 0              | -4.678394               | -3.725530 | 0.774050  |
| 23               | 1                | 0              | -4.431470               | -4.253552 | -0.142555 |
| 24               | 6                | 0              | 4.909410                | -1.993873 | 1.739961  |
| 25               | 1                | 0              | 4.759735                | -0.926597 | 1.874694  |
| 26               | 6                | 0              | -4.594337               | -1.699287 | 2.114355  |
| 27               | 1                | 0              | -4.288325               | -0.663644 | 2.227305  |
| 28               | 6                | 0              | 0.048087                | -1.574806 | 0.045511  |
| 29               | 6                | 0              | 1.314264                | -2.812478 | 1.680435  |
| 30               | 1                | 0              | 2.250920                | -3.142255 | 2.114118  |
| 31               | 6                | 0              | -1.130954               | -2.836441 | 1.738379  |
| 32               | 1                | 0              | -2.043386               | -3.198431 | 2.197468  |
| 33               | 6                | 0              | -1.163004               | -2.006610 | 0.602750  |
| 34               | 6                | 0              | 5.637001                | -2.730524 | 2.677217  |
| 35               | 1                | 0              | 6.051130                | -2.224214 | 3.545018  |
| 36               | 6                | 0              | 2.363015                | -1.529029 | -0.340304 |
| 37               | 6                | 0              | -5.293390               | -2.352297 | 3.127296  |
| 38               | 1                | 0              | -5.530971               | -1.812270 | 4.040038  |
| 39               | 6                | 0              | -5.375099               | -4.362945 | 1.799875  |
| 40               | 1                | 0              | -5.673791               | -5.400509 | 1.673737  |
| 41               | 6                | 0              | 5.842906                | -4.108153 | 2.517780  |

|    |   |   |           |           |           |
|----|---|---|-----------|-----------|-----------|
| 42 | 6 | 0 | -5.694093 | -3.690980 | 2.989013  |
| 43 | 6 | 0 | 5.295252  | -4.735577 | 1.385837  |
| 44 | 1 | 0 | 5.442279  | -5.803006 | 1.241980  |
| 45 | 6 | 0 | 6.641297  | -4.900449 | 3.523987  |
| 46 | 1 | 0 | 6.863203  | -4.306227 | 4.415729  |
| 47 | 1 | 0 | 7.596580  | -5.230772 | 3.095906  |
| 48 | 1 | 0 | 6.102626  | -5.802187 | 3.838169  |
| 49 | 6 | 0 | -6.470000 | -4.375825 | 4.088041  |
| 50 | 1 | 0 | -6.494746 | -5.463769 | 3.943470  |
| 51 | 1 | 0 | -7.511548 | -4.017814 | 4.111011  |
| 52 | 1 | 0 | -6.034461 | -4.164602 | 5.075012  |
| 53 | 1 | 0 | 4.963157  | -1.950229 | -2.011400 |
| 54 | 1 | 0 | -4.930788 | -0.286412 | -0.847715 |
| 55 | 6 | 0 | -3.069570 | -1.109783 | -3.581558 |
| 56 | 6 | 0 | 3.404178  | 0.521119  | -3.199213 |
| 57 | 6 | 0 | 4.700986  | 0.273574  | -4.001098 |
| 58 | 1 | 0 | 4.871383  | 1.103166  | -4.696581 |
| 59 | 1 | 0 | 5.582419  | 0.201917  | -3.353909 |
| 60 | 1 | 0 | 4.635594  | -0.648238 | -4.592392 |
| 61 | 6 | 0 | 2.253945  | 0.723654  | -4.202627 |
| 62 | 1 | 0 | 2.147308  | -0.147232 | -4.861649 |
| 63 | 1 | 0 | 1.301672  | 0.891223  | -3.694602 |
| 64 | 1 | 0 | 2.452628  | 1.598385  | -4.833142 |
| 65 | 6 | 0 | 3.570866  | 1.778831  | -2.329771 |
| 66 | 1 | 0 | 2.666622  | 1.990156  | -1.750647 |
| 67 | 1 | 0 | 4.410643  | 1.690905  | -1.629984 |
| 68 | 1 | 0 | 3.770717  | 2.647175  | -2.968645 |
| 69 | 6 | 0 | -1.872914 | -0.480560 | -4.314986 |
| 70 | 1 | 0 | -1.936257 | 0.612992  | -4.325461 |
| 71 | 1 | 0 | -0.916983 | -0.760153 | -3.851006 |
| 72 | 1 | 0 | -1.846718 | -0.830563 | -5.353657 |
| 73 | 6 | 0 | -4.365631 | -0.699553 | -4.307034 |
| 74 | 1 | 0 | -5.256734 | -1.141223 | -3.846384 |
| 75 | 1 | 0 | -4.491717 | 0.390000  | -4.315648 |
| 76 | 1 | 0 | -4.331516 | -1.041489 | -5.347641 |
| 77 | 6 | 0 | -2.924799 | -2.642061 | -3.585742 |
| 78 | 1 | 0 | -3.767080 | -3.143682 | -3.095148 |
| 79 | 1 | 0 | -2.889944 | -3.005079 | -4.619211 |
| 80 | 1 | 0 | -1.999998 | -2.964115 | -3.092580 |
| 81 | 8 | 0 | -0.276972 | 1.963397  | -2.360895 |
| 82 | 8 | 0 | 0.403303  | 1.695751  | 0.200553  |
| 83 | 6 | 0 | -0.368267 | 2.963357  | -1.663036 |
| 84 | 6 | 0 | -0.077777 | 2.976837  | -0.145084 |
| 85 | 8 | 0 | -0.730947 | 4.151103  | -2.100659 |



|     |   |   |           |          |           |
|-----|---|---|-----------|----------|-----------|
| 86  | 6 | 0 | -1.067248 | 4.277610 | -3.510195 |
| 87  | 1 | 0 | -1.311376 | 5.329845 | -3.646983 |
| 88  | 1 | 0 | -0.209066 | 3.997122 | -4.123843 |
| 89  | 1 | 0 | -1.928324 | 3.647793 | -3.742005 |
| 90  | 6 | 0 | -1.441059 | 3.147815 | 0.579481  |
| 91  | 9 | 0 | -1.907465 | 4.403705 | 0.502982  |
| 92  | 9 | 0 | -1.354391 | 2.802197 | 1.871498  |
| 93  | 9 | 0 | -2.371520 | 2.337711 | 0.007002  |
| 94  | 6 | 0 | 0.279132  | 4.721654 | 5.086755  |
| 95  | 6 | 0 | 0.869392  | 4.077563 | 4.000503  |
| 96  | 6 | 0 | 0.881776  | 4.673590 | 2.725732  |
| 97  | 6 | 0 | 0.273216  | 5.932158 | 2.574245  |
| 98  | 6 | 0 | -0.313194 | 6.578676 | 3.663694  |
| 99  | 6 | 0 | -0.314338 | 5.976789 | 4.923465  |
| 100 | 1 | 0 | 0.274136  | 4.238402 | 6.060107  |
| 101 | 1 | 0 | 1.305598  | 3.091833 | 4.134555  |
| 102 | 1 | 0 | 0.277326  | 6.428912 | 1.608785  |
| 103 | 1 | 0 | -0.768632 | 7.555571 | 3.525186  |
| 104 | 1 | 0 | -0.777665 | 6.477535 | 5.769124  |
| 105 | 6 | 0 | 1.550640  | 3.997720 | 1.577850  |
| 106 | 6 | 0 | 2.681858  | 3.284432 | 1.741774  |
| 107 | 1 | 0 | 3.191217  | 2.824268 | 0.897619  |
| 108 | 1 | 0 | 3.163860  | 3.185994 | 2.710128  |
| 109 | 1 | 0 | 1.153496  | 1.794500 | 0.825441  |
| 110 | 6 | 0 | 0.948623  | 4.103663 | 0.185093  |
| 111 | 1 | 0 | 1.748723  | 4.011297 | -0.555018 |
| 112 | 1 | 0 | 0.461744  | 5.064669 | 0.016766  |

---

**TS1S<sub>4</sub>**

Imaginary frequency= -402.31

Total energy= -1028.35771827

Sum of electronic and zero-point Energies= -1028.118639

Sum of electronic and thermal Energies= -1028.101359

Sum of electronic and thermal Enthalpies= -1028.100415

Sum of electronic and thermal Free Energies= -1028.164584

---

| Center<br>Number | Atomic<br>Number | Atomic<br>Type | Coordinates (Angstroms) |          |           |
|------------------|------------------|----------------|-------------------------|----------|-----------|
|                  |                  |                | X                       | Y        | Z         |
| 1                | 8                | 0              | 1.292952                | 1.452527 | 1.311193  |
| 2                | 1                | 0              | -0.032310               | 2.182904 | 1.025397  |
| 3                | 6                | 0              | 1.348096                | 0.510470 | 0.408499  |
| 4                | 6                | 0              | 2.713578                | 0.491270 | -0.345462 |

|    |   |   |           |           |           |
|----|---|---|-----------|-----------|-----------|
| 5  | 6 | 0 | 0.254781  | 0.757049  | -0.936056 |
| 6  | 1 | 0 | 0.232074  | -0.149672 | -1.535087 |
| 7  | 1 | 0 | 0.791274  | 1.550365  | -1.459218 |
| 8  | 6 | 0 | -1.010949 | 1.244617  | -0.426188 |
| 9  | 6 | 0 | -0.887079 | 2.506440  | 0.252477  |
| 10 | 1 | 0 | -1.761977 | 2.903234  | 0.763801  |
| 11 | 1 | 0 | -0.342779 | 3.275290  | -0.303295 |
| 12 | 6 | 0 | 0.996765  | -0.866724 | 1.037773  |
| 13 | 9 | 0 | 0.818699  | -1.887330 | 0.163063  |
| 14 | 9 | 0 | -0.144548 | -0.769129 | 1.753870  |
| 15 | 9 | 0 | 1.974718  | -1.250405 | 1.890421  |
| 16 | 8 | 0 | 3.437225  | 1.458334  | -0.412710 |
| 17 | 8 | 0 | 2.967685  | -0.688017 | -0.931260 |
| 18 | 6 | 0 | -2.235957 | 0.449716  | -0.399128 |
| 19 | 6 | 0 | -2.244011 | -0.932998 | -0.698167 |
| 20 | 6 | 0 | -3.474627 | 1.075003  | -0.123884 |
| 21 | 6 | 0 | -3.430807 | -1.656151 | -0.694750 |
| 22 | 1 | 0 | -1.316547 | -1.453212 | -0.902144 |
| 23 | 6 | 0 | -4.661209 | 0.349493  | -0.133534 |
| 24 | 1 | 0 | -3.512517 | 2.141113  | 0.068833  |
| 25 | 6 | 0 | -4.644068 | -1.019294 | -0.413855 |
| 26 | 1 | 0 | -3.411360 | -2.719942 | -0.913024 |
| 27 | 1 | 0 | -5.601105 | 0.853662  | 0.071829  |
| 28 | 1 | 0 | -5.570942 | -1.586074 | -0.420411 |
| 29 | 6 | 0 | 4.207157  | -0.773798 | -1.668813 |
| 30 | 1 | 0 | 4.241974  | -1.790064 | -2.061841 |
| 31 | 1 | 0 | 4.213822  | -0.047057 | -2.485106 |
| 32 | 1 | 0 | 5.057660  | -0.592089 | -1.007169 |

---

**TS1R<sub>B</sub>**

Imaginary frequency= -401.96

Total energy= -1028.35771808

Sum of electronic and zero-point Energies= -1028.118639

Sum of electronic and thermal Energies= -1028.101358

Sum of electronic and thermal Enthalpies= -1028.100413

Sum of electronic and thermal Free Energies= -1028.164590

---

| Center<br>Number | Atomic<br>Number | Atomic<br>Type | Coordinates (Angstroms) |          |          |
|------------------|------------------|----------------|-------------------------|----------|----------|
|                  |                  |                | X                       | Y        | Z        |
| 1                | 8                | 0              | -1.292432               | 1.448862 | 1.314509 |
| 2                | 1                | 0              | 0.032468                | 2.180271 | 1.029544 |
| 3                | 6                | 0              | -1.348064               | 0.508881 | 0.409691 |

|    |   |   |           |           |           |
|----|---|---|-----------|-----------|-----------|
| 4  | 6 | 0 | -2.713269 | 0.492770  | -0.344726 |
| 5  | 6 | 0 | -0.254559 | 0.757929  | -0.934586 |
| 6  | 1 | 0 | -0.231705 | -0.147872 | -1.535034 |
| 7  | 1 | 0 | -0.791274 | 1.551972  | -1.456394 |
| 8  | 6 | 0 | 1.011044  | 1.244939  | -0.423988 |
| 9  | 6 | 0 | 0.886758  | 2.505537  | 0.256886  |
| 10 | 1 | 0 | 0.341899  | 3.275035  | -0.297441 |
| 11 | 1 | 0 | 1.761601  | 2.901897  | 0.768622  |
| 12 | 6 | 0 | -0.997185 | -0.869836 | 1.035818  |
| 13 | 9 | 0 | -1.973882 | -1.253887 | 1.889680  |
| 14 | 9 | 0 | 0.145636  | -0.774874 | 1.749935  |
| 15 | 9 | 0 | -0.821944 | -1.889033 | 0.158918  |
| 16 | 8 | 0 | -3.433640 | 1.462188  | -0.413589 |
| 17 | 8 | 0 | -2.970960 | -0.686322 | -0.929276 |
| 18 | 6 | 0 | 2.236366  | 0.450447  | -0.398433 |
| 19 | 6 | 0 | 2.244943  | -0.931733 | -0.699921 |
| 20 | 6 | 0 | 3.474803  | 1.075665  | -0.121956 |
| 21 | 6 | 0 | 3.431997  | -1.654470 | -0.697696 |
| 22 | 1 | 0 | 1.317708  | -1.451983 | -0.904904 |
| 23 | 6 | 0 | 4.661642  | 0.350589  | -0.132789 |
| 24 | 1 | 0 | 3.512329  | 2.141442  | 0.072687  |
| 25 | 6 | 0 | 4.645010  | -1.017702 | -0.415535 |
| 26 | 1 | 0 | 3.412936  | -2.717880 | -0.917852 |
| 27 | 1 | 0 | 5.601337  | 0.854733  | 0.073557  |
| 28 | 1 | 0 | 5.572079  | -1.584154 | -0.422976 |
| 29 | 6 | 0 | -4.209636 | -0.768250 | -1.668608 |
| 30 | 1 | 0 | -4.247234 | -1.784462 | -2.061519 |
| 31 | 1 | 0 | -5.060514 | -0.583717 | -1.008232 |
| 32 | 1 | 0 | -4.212771 | -0.041550 | -2.484946 |

**PR**

Total energy= -1028.40085728

Sum of electronic and zero-point Energies= -1028.157582

Sum of electronic and thermal Energies= -1028.139650

Sum of electronic and thermal Enthalpies= -1028.138706

Sum of electronic and thermal Free Energies= -1028.204319

| Center<br>Number | Atomic<br>Number | Atomic<br>Type | Coordinates (Angstroms) |          |          |
|------------------|------------------|----------------|-------------------------|----------|----------|
|                  |                  |                | X                       | Y        | Z        |
| 1                | 8                | 0              | -1.500880               | 1.572106 | 1.191118 |
| 2                | 1                | 0              | -0.606135               | 1.786479 | 1.519027 |
| 3                | 6                | 0              | -1.357079               | 0.517104 | 0.276775 |

|    |   |   |           |           |           |
|----|---|---|-----------|-----------|-----------|
| 4  | 6 | 0 | -2.709446 | 0.409466  | -0.467670 |
| 5  | 6 | 0 | -0.232016 | 0.769795  | -0.785241 |
| 6  | 1 | 0 | -0.098034 | -0.136968 | -1.377254 |
| 7  | 1 | 0 | -0.639643 | 1.529484  | -1.460603 |
| 8  | 6 | 0 | 1.097176  | 1.294531  | -0.245863 |
| 9  | 6 | 0 | 1.153725  | 2.557624  | 0.221973  |
| 10 | 1 | 0 | 0.297308  | 3.223992  | 0.166191  |
| 11 | 1 | 0 | 2.057352  | 2.975753  | 0.655052  |
| 12 | 6 | 0 | -1.138109 | -0.768104 | 1.110213  |
| 13 | 9 | 0 | -2.223783 | -1.034516 | 1.866032  |
| 14 | 9 | 0 | -0.089968 | -0.610837 | 1.950507  |
| 15 | 9 | 0 | -0.891868 | -1.867426 | 0.365903  |
| 16 | 8 | 0 | -3.616621 | 1.197694  | -0.344105 |
| 17 | 8 | 0 | -2.717221 | -0.649479 | -1.285848 |
| 18 | 6 | 0 | 2.319075  | 0.439569  | -0.305982 |
| 19 | 6 | 0 | 2.265759  | -0.966115 | -0.269290 |
| 20 | 6 | 0 | 3.589294  | 1.039711  | -0.426507 |
| 21 | 6 | 0 | 3.430670  | -1.733898 | -0.319364 |
| 22 | 1 | 0 | 1.315654  | -1.479209 | -0.189042 |
| 23 | 6 | 0 | 4.751816  | 0.273726  | -0.475575 |
| 24 | 1 | 0 | 3.665788  | 2.119235  | -0.510327 |
| 25 | 6 | 0 | 4.679975  | -1.120480 | -0.417866 |
| 26 | 1 | 0 | 3.356145  | -2.817560 | -0.280901 |
| 27 | 1 | 0 | 5.714860  | 0.768001  | -0.574181 |
| 28 | 1 | 0 | 5.585424  | -1.719700 | -0.462385 |
| 29 | 6 | 0 | -3.929773 | -0.854043 | -2.046684 |
| 30 | 1 | 0 | -3.747097 | -1.745484 | -2.646373 |
| 31 | 1 | 0 | -4.775937 | -1.012117 | -1.373723 |
| 32 | 1 | 0 | -4.123741 | 0.007231  | -2.690300 |

**PS**

Total energy= -1028.40085728

Sum of electronic and zero-point Energies= -1028.157582

Sum of electronic and thermal Energies= -1028.139650

Sum of electronic and thermal Enthalpies= -1028.138706

Sum of electronic and thermal Free Energies= -1028.204319

| Center<br>Number | Atomic<br>Number | Atomic<br>Type | Coordinates (Angstroms) |          |          |
|------------------|------------------|----------------|-------------------------|----------|----------|
|                  |                  |                | X                       | Y        | Z        |
| 1                | 8                | 0              | 1.500880                | 1.572106 | 1.191118 |
| 2                | 1                | 0              | 0.606135                | 1.786479 | 1.519027 |
| 3                | 6                | 0              | 1.357079                | 0.517104 | 0.276775 |

|    |   |   |           |           |           |
|----|---|---|-----------|-----------|-----------|
| 4  | 6 | 0 | 2.709446  | 0.409466  | -0.467670 |
| 5  | 6 | 0 | 0.232016  | 0.769795  | -0.785241 |
| 6  | 1 | 0 | 0.098034  | -0.136969 | -1.377254 |
| 7  | 1 | 0 | 0.639643  | 1.529484  | -1.460603 |
| 8  | 6 | 0 | -1.097176 | 1.294531  | -0.245863 |
| 9  | 6 | 0 | -1.153725 | 2.557624  | 0.221973  |
| 10 | 1 | 0 | -2.057352 | 2.975753  | 0.655052  |
| 11 | 1 | 0 | -0.297308 | 3.223992  | 0.166191  |
| 12 | 6 | 0 | 1.138109  | -0.768104 | 1.110213  |
| 13 | 9 | 0 | 0.891868  | -1.867426 | 0.365903  |
| 14 | 9 | 0 | 0.089968  | -0.610836 | 1.950508  |
| 15 | 9 | 0 | 2.223783  | -1.034516 | 1.866032  |
| 16 | 8 | 0 | 3.616621  | 1.197694  | -0.344106 |
| 17 | 8 | 0 | 2.717221  | -0.649480 | -1.285848 |
| 18 | 6 | 0 | -2.319075 | 0.439569  | -0.305981 |
| 19 | 6 | 0 | -2.265759 | -0.966115 | -0.269290 |
| 20 | 6 | 0 | -3.589294 | 1.039711  | -0.426507 |
| 21 | 6 | 0 | -3.430670 | -1.733898 | -0.319364 |
| 22 | 1 | 0 | -1.315654 | -1.479209 | -0.189042 |
| 23 | 6 | 0 | -4.751816 | 0.273726  | -0.475575 |
| 24 | 1 | 0 | -3.665788 | 2.119235  | -0.510328 |
| 25 | 6 | 0 | -4.679975 | -1.120480 | -0.417866 |
| 26 | 1 | 0 | -3.356145 | -2.817560 | -0.280900 |
| 27 | 1 | 0 | -5.714860 | 0.768001  | -0.574182 |
| 28 | 1 | 0 | -5.585424 | -1.719700 | -0.462385 |
| 29 | 6 | 0 | 3.929773  | -0.854044 | -2.046684 |
| 30 | 1 | 0 | 3.747096  | -1.745484 | -2.646373 |
| 31 | 1 | 0 | 4.123740  | 0.007230  | -2.690301 |
| 32 | 1 | 0 | 4.775937  | -1.012117 | -1.373724 |

---

### M1<sub>endo</sub>-CI

Total energy= -2789.49735783

Sum of electronic and zero-point Energies= -2788.731521

Sum of electronic and thermal Energies= -2788.681128

Sum of electronic and thermal Enthalpies= -2788.680184

Sum of electronic and thermal Free Energies= -2788.817765

---

| Center<br>Number | Atomic<br>Number | Atomic<br>Type | Coordinates (Angstroms) |           |           |
|------------------|------------------|----------------|-------------------------|-----------|-----------|
|                  |                  |                | X                       | Y         | Z         |
| 1                | 45               | 0              | -0.075661               | -0.890221 | -0.803306 |
| 2                | 6                | 0              | 3.266212                | -0.595727 | -0.795352 |
| 3                | 1                | 0              | 3.377302                | -1.294128 | 0.044316  |

|    |   |   |           |           |           |
|----|---|---|-----------|-----------|-----------|
| 4  | 7 | 0 | 3.114233  | 1.683700  | -0.126965 |
| 5  | 6 | 0 | 1.879613  | 1.176702  | -0.355831 |
| 6  | 6 | 0 | 3.487662  | 3.054239  | 0.054802  |
| 7  | 7 | 0 | 1.873511  | -0.082389 | -0.759629 |
| 8  | 6 | 0 | 4.120794  | 0.673379  | -0.512285 |
| 9  | 1 | 0 | 4.663173  | 1.026287  | -1.395509 |
| 10 | 7 | 0 | -2.154367 | -1.033552 | -0.633792 |
| 11 | 6 | 0 | -4.507596 | -1.269132 | -0.757553 |
| 12 | 1 | 0 | -4.971012 | -1.687743 | 0.143958  |
| 13 | 7 | 0 | -4.073014 | 0.118765  | -0.484673 |
| 14 | 6 | 0 | -3.179005 | -1.976449 | -1.135261 |
| 15 | 1 | 0 | -3.087180 | -1.998132 | -2.230675 |
| 16 | 6 | 0 | -5.637947 | 1.929492  | -0.978668 |
| 17 | 1 | 0 | -5.394226 | 1.823032  | -2.031876 |
| 18 | 6 | 0 | -1.827731 | 1.263446  | -0.086842 |
| 19 | 6 | 0 | -1.071026 | 3.480359  | 0.518899  |
| 20 | 1 | 0 | -1.300781 | 4.491533  | 0.839974  |
| 21 | 6 | 0 | -5.003273 | 1.113140  | -0.039021 |
| 22 | 6 | 0 | 4.001180  | 3.465759  | 1.289862  |
| 23 | 1 | 0 | 4.076536  | 2.750252  | 2.103957  |
| 24 | 6 | 0 | -5.314678 | 1.242030  | 1.320375  |
| 25 | 1 | 0 | -4.827771 | 0.600963  | 2.050129  |
| 26 | 6 | 0 | 3.391315  | 3.969711  | -0.998477 |
| 27 | 1 | 0 | 3.003282  | 3.646785  | -1.960534 |
| 28 | 6 | 0 | -0.486664 | 0.922903  | -0.298724 |
| 29 | 6 | 0 | -2.118744 | 2.574179  | 0.322883  |
| 30 | 1 | 0 | -3.140262 | 2.893403  | 0.491956  |
| 31 | 6 | 0 | 0.264731  | 3.119050  | 0.315406  |
| 32 | 1 | 0 | 1.045206  | 3.849754  | 0.488535  |
| 33 | 6 | 0 | 0.572472  | 1.816125  | -0.111932 |
| 34 | 6 | 0 | -6.242152 | 2.198604  | 1.730133  |
| 35 | 1 | 0 | -6.472569 | 2.298674  | 2.788211  |
| 36 | 6 | 0 | -2.725256 | 0.128590  | -0.367164 |
| 37 | 6 | 0 | 3.784379  | 5.294716  | -0.802349 |
| 38 | 1 | 0 | 3.696146  | 6.002930  | -1.622409 |
| 39 | 6 | 0 | 4.397900  | 4.789487  | 1.470516  |
| 40 | 1 | 0 | 4.786761  | 5.102102  | 2.436624  |
| 41 | 6 | 0 | -6.884451 | 3.033496  | 0.801202  |
| 42 | 6 | 0 | 4.294010  | 5.727257  | 0.430549  |
| 43 | 6 | 0 | -6.566919 | 2.881741  | -0.556064 |
| 44 | 1 | 0 | -7.049140 | 3.518909  | -1.293103 |
| 45 | 6 | 0 | -7.902709 | 4.050727  | 1.256658  |
| 46 | 1 | 0 | -7.564037 | 4.580533  | 2.154355  |
| 47 | 1 | 0 | -8.856154 | 3.567866  | 1.509456  |

|    |   |   |           |           |           |
|----|---|---|-----------|-----------|-----------|
| 48 | 1 | 0 | -8.105350 | 4.791965  | 0.477091  |
| 49 | 6 | 0 | 4.741100  | 7.154584  | 0.633769  |
| 50 | 1 | 0 | 4.346895  | 7.813057  | -0.146733 |
| 51 | 1 | 0 | 5.836315  | 7.231898  | 0.609558  |
| 52 | 1 | 0 | 4.414325  | 7.540966  | 1.606019  |
| 53 | 1 | 0 | -5.241506 | -1.283740 | -1.565783 |
| 54 | 1 | 0 | 4.840134  | 0.524517  | 0.296586  |
| 55 | 6 | 0 | 3.670939  | -1.374766 | -2.080430 |
| 56 | 6 | 0 | -3.020347 | -3.436084 | -0.634236 |
| 57 | 6 | 0 | -4.203249 | -4.263855 | -1.175269 |
| 58 | 1 | 0 | -4.081916 | -5.320033 | -0.907025 |
| 59 | 1 | 0 | -5.162241 | -3.928129 | -0.762632 |
| 60 | 1 | 0 | -4.264784 | -4.202881 | -2.269144 |
| 61 | 6 | 0 | -1.710794 | -4.008274 | -1.208886 |
| 62 | 1 | 0 | -1.718634 | -3.991199 | -2.305952 |
| 63 | 1 | 0 | -0.838303 | -3.438848 | -0.864736 |
| 64 | 1 | 0 | -1.569851 | -5.047916 | -0.889185 |
| 65 | 6 | 0 | -2.985779 | -3.517729 | 0.902118  |
| 66 | 1 | 0 | -2.156578 | -2.931489 | 1.313964  |
| 67 | 1 | 0 | -3.914058 | -3.154375 | 1.358949  |
| 68 | 1 | 0 | -2.853528 | -4.559145 | 1.219178  |
| 69 | 6 | 0 | 2.824875  | -2.657313 | -2.182291 |
| 70 | 1 | 0 | 2.990678  | -3.312889 | -1.319622 |
| 71 | 1 | 0 | 1.754833  | -2.428624 | -2.244356 |
| 72 | 1 | 0 | 3.093280  | -3.221505 | -3.083845 |
| 73 | 6 | 0 | 5.152281  | -1.782124 | -1.935650 |
| 74 | 1 | 0 | 5.821762  | -0.913985 | -1.915208 |
| 75 | 1 | 0 | 5.319250  | -2.361220 | -1.018096 |
| 76 | 1 | 0 | 5.454908  | -2.408147 | -2.783332 |
| 77 | 6 | 0 | 3.481358  | -0.532214 | -3.353248 |
| 78 | 1 | 0 | 4.083477  | 0.384160  | -3.340919 |
| 79 | 1 | 0 | 3.792991  | -1.110856 | -4.231360 |
| 80 | 1 | 0 | 2.432641  | -0.250751 | -3.490065 |
| 81 | 8 | 0 | 0.092910  | -1.299426 | 1.341639  |
| 82 | 8 | 0 | 1.254387  | -3.833365 | 0.585543  |
| 83 | 6 | 0 | 0.767110  | -2.025322 | 2.066750  |
| 84 | 6 | 0 | 1.614929  | -3.188089 | 1.533553  |
| 85 | 8 | 0 | 0.822209  | -1.936500 | 3.367795  |
| 86 | 6 | 0 | 0.024736  | -0.900589 | 4.022711  |
| 87 | 1 | 0 | 0.237873  | -1.017279 | 5.083185  |
| 88 | 1 | 0 | 0.339937  | 0.079874  | 3.661454  |
| 89 | 1 | 0 | -1.032025 | -1.073415 | 3.811972  |
| 90 | 6 | 0 | 2.966927  | -3.468859 | 2.237151  |
| 91 | 9 | 0 | 3.612941  | -2.302264 | 2.436646  |

|    |    |   |           |           |           |
|----|----|---|-----------|-----------|-----------|
| 92 | 9  | 0 | 3.722684  | -4.255565 | 1.470946  |
| 93 | 9  | 0 | 2.776014  | -4.060666 | 3.422494  |
| 94 | 17 | 0 | -0.351861 | -0.387476 | -3.071444 |

---

**M1<sub>exo</sub>-Cl**

Total energy= -2789.49547150

Sum of electronic and zero-point Energies= -2788.730673

Sum of electronic and thermal Energies= -2788.681627

Sum of electronic and thermal Enthalpies= -2788.680683

Sum of electronic and thermal Free Energies= -2788.814574

---

| Center<br>Number | Atomic<br>Number | Atomic<br>Type | Coordinates (Angstroms) |           |           |
|------------------|------------------|----------------|-------------------------|-----------|-----------|
|                  |                  |                | X                       | Y         | Z         |
| 1                | 45               | 0              | -0.057440               | -0.903119 | -0.859900 |
| 2                | 6                | 0              | 3.301437                | -0.942502 | -0.934463 |
| 3                | 1                | 0              | 3.324607                | -1.774813 | -0.219863 |
| 4                | 7                | 0              | 3.389343                | 1.276433  | -0.055446 |
| 5                | 6                | 0              | 2.109337                | 0.922578  | -0.314317 |
| 6                | 6                | 0              | 3.916446                | 2.582316  | 0.195405  |
| 7                | 7                | 0              | 1.970695                | -0.292322 | -0.817859 |
| 8                | 6                | 0              | 4.283252                | 0.172182  | -0.462561 |
| 9                | 1                | 0              | 4.943496                | 0.523516  | -1.260516 |
| 10               | 7                | 0              | -2.136286               | -0.837966 | -0.677312 |
| 11               | 6                | 0              | -4.498433               | -0.787080 | -0.886552 |
| 12               | 1                | 0              | -5.059122               | -1.191843 | -0.036060 |
| 13               | 7                | 0              | -3.913119               | 0.518138  | -0.514636 |
| 14               | 6                | 0              | -3.247316               | -1.637157 | -1.243981 |
| 15               | 1                | 0              | -3.116674               | -1.642615 | -2.335071 |
| 16               | 6                | 0              | -4.962689               | 2.646253  | -1.113964 |
| 17               | 1                | 0              | -4.505811               | 2.573271  | -2.096754 |
| 18               | 6                | 0              | -1.569954               | 1.378205  | -0.004670 |
| 19               | 6                | 0              | -0.581169               | 3.434418  | 0.797034  |
| 20               | 1                | 0              | -0.700053               | 4.427959  | 1.217762  |
| 21               | 6                | 0              | -4.727854               | 1.643425  | -0.167417 |
| 22               | 6                | 0              | 3.826324                | 3.590865  | -0.773371 |
| 23               | 1                | 0              | 3.320200                | 3.391280  | -1.713763 |
| 24               | 6                | 0              | -5.325437               | 1.720768  | 1.094855  |
| 25               | 1                | 0              | -5.147734               | 0.936046  | 1.825034  |
| 26               | 6                | 0              | 4.586364                | 2.831139  | 1.396261  |
| 27               | 1                | 0              | 4.658489                | 2.046683  | 2.144388  |
| 28               | 6                | 0              | -0.273463               | 0.915665  | -0.251754 |
| 29               | 6                | 0              | -1.720342               | 2.668444  | 0.527818  |



|    |   |   |           |           |           |
|----|---|---|-----------|-----------|-----------|
| 30 | 1 | 0 | -2.701897 | 3.074360  | 0.741686  |
| 31 | 6 | 0 | 0.707792  | 2.955148  | 0.542398  |
| 32 | 1 | 0 | 1.562267  | 3.578682  | 0.775045  |
| 33 | 6 | 0 | 0.875585  | 1.671945  | -0.005667 |
| 34 | 6 | 0 | -6.141963 | 2.807806  | 1.408364  |
| 35 | 1 | 0 | -6.602081 | 2.862231  | 2.391795  |
| 36 | 6 | 0 | -2.580448 | 0.370140  | -0.369641 |
| 37 | 6 | 0 | 5.151360  | 4.086145  | 1.629773  |
| 38 | 1 | 0 | 5.668975  | 4.270363  | 2.567772  |
| 39 | 6 | 0 | 4.381520  | 4.843789  | -0.521464 |
| 40 | 1 | 0 | 4.300513  | 5.622485  | -1.276252 |
| 41 | 6 | 0 | -6.378599 | 3.830879  | 0.477648  |
| 42 | 6 | 0 | 5.055071  | 5.113693  | 0.681384  |
| 43 | 6 | 0 | -5.777936 | 3.729343  | -0.786823 |
| 44 | 1 | 0 | -5.953301 | 4.506273  | -1.526883 |
| 45 | 6 | 0 | -7.236344 | 5.021226  | 0.833401  |
| 46 | 1 | 0 | -6.618382 | 5.861422  | 1.178460  |
| 47 | 1 | 0 | -7.939731 | 4.781511  | 1.637561  |
| 48 | 1 | 0 | -7.808505 | 5.375195  | -0.031139 |
| 49 | 6 | 0 | 5.653622  | 6.475668  | 0.937326  |
| 50 | 1 | 0 | 6.185027  | 6.506065  | 1.893607  |
| 51 | 1 | 0 | 4.878331  | 7.252247  | 0.957318  |
| 52 | 1 | 0 | 6.362252  | 6.753314  | 0.147199  |
| 53 | 1 | 0 | -5.182862 | -0.665807 | -1.728783 |
| 54 | 1 | 0 | 4.902568  | -0.142673 | 0.381661  |
| 55 | 6 | 0 | 3.642370  | -1.546291 | -2.331199 |
| 56 | 6 | 0 | -3.289376 | -3.118228 | -0.779351 |
| 57 | 6 | 0 | -4.547409 | -3.778147 | -1.379370 |
| 58 | 1 | 0 | -4.557857 | -4.850182 | -1.149737 |
| 59 | 1 | 0 | -5.470393 | -3.346229 | -0.974659 |
| 60 | 1 | 0 | -4.572141 | -3.671090 | -2.471134 |
| 61 | 6 | 0 | -2.045114 | -3.841176 | -1.327889 |
| 62 | 1 | 0 | -2.015217 | -3.802520 | -2.424147 |
| 63 | 1 | 0 | -1.117242 | -3.394583 | -0.948404 |
| 64 | 1 | 0 | -2.049366 | -4.896633 | -1.029390 |
| 65 | 6 | 0 | -3.322677 | -3.238303 | 0.753853  |
| 66 | 1 | 0 | -2.441714 | -2.774436 | 1.210918  |
| 67 | 1 | 0 | -4.211372 | -2.764113 | 1.186467  |
| 68 | 1 | 0 | -3.340101 | -4.294459 | 1.048375  |
| 69 | 6 | 0 | 2.663407  | -2.690602 | -2.651854 |
| 70 | 1 | 0 | 2.689789  | -3.466930 | -1.879053 |
| 71 | 1 | 0 | 1.635048  | -2.325014 | -2.738072 |
| 72 | 1 | 0 | 2.929106  | -3.157336 | -3.608445 |
| 73 | 6 | 0 | 5.065751  | -2.137173 | -2.250480 |

|    |    |   |           |           |           |
|----|----|---|-----------|-----------|-----------|
| 74 | 1  | 0 | 5.826918  | -1.369727 | -2.066844 |
| 75 | 1  | 0 | 5.142544  | -2.887151 | -1.452556 |
| 76 | 1  | 0 | 5.321859  | -2.630984 | -3.195196 |
| 77 | 6  | 0 | 3.578627  | -0.489649 | -3.447645 |
| 78 | 1  | 0 | 4.287594  | 0.331305  | -3.285996 |
| 79 | 1  | 0 | 3.831719  | -0.949703 | -4.410534 |
| 80 | 1  | 0 | 2.573563  | -0.064566 | -3.533185 |
| 81 | 8  | 0 | 1.214457  | -3.845972 | 0.254763  |
| 82 | 8  | 0 | 0.106714  | -1.437167 | 1.211539  |
| 83 | 6  | 0 | 1.284893  | -3.533061 | 1.422735  |
| 84 | 6  | 0 | 0.594083  | -2.271040 | 1.951579  |
| 85 | 8  | 0 | 1.917272  | -4.166414 | 2.392522  |
| 86 | 6  | 0 | 2.609888  | -5.394206 | 2.030795  |
| 87 | 1  | 0 | 3.098548  | -5.723308 | 2.946001  |
| 88 | 1  | 0 | 1.883575  | -6.134227 | 1.687952  |
| 89 | 1  | 0 | 3.342320  | -5.186690 | 1.248454  |
| 90 | 6  | 0 | 0.474011  | -2.036195 | 3.476223  |
| 91 | 9  | 0 | -0.119356 | -3.089002 | 4.055298  |
| 92 | 9  | 0 | -0.253437 | -0.942924 | 3.717984  |
| 93 | 9  | 0 | 1.693645  | -1.869896 | 4.007448  |
| 94 | 17 | 0 | -0.302957 | -0.275926 | -3.085555 |

---

**TS2R<sub>endo</sub>-Cl**

Imaginary frequency= -156.91

Total energy= -3138.45209039

Sum of electronic and zero-point Energies= -3137.523241

Sum of electronic and thermal Energies= -3137.464354

Sum of electronic and thermal Enthalpies= -3137.463410

Sum of electronic and thermal Free Energies= -3137.619644

---

| Center<br>Number | Atomic<br>Number | Atomic<br>Type | Coordinates (Angstroms) |           |           |
|------------------|------------------|----------------|-------------------------|-----------|-----------|
|                  |                  |                | X                       | Y         | Z         |
| 1                | 45               | 0              | 0.513716                | -0.281577 | 1.187340  |
| 2                | 6                | 0              | -1.354146               | 2.492313  | 1.541948  |
| 3                | 1                | 0              | -2.215030               | 1.971248  | 1.118383  |
| 4                | 7                | 0              | 0.197650                | 3.747735  | 0.233945  |
| 5                | 6                | 0              | 0.666067                | 2.496801  | 0.442370  |
| 6                | 6                | 0              | 0.832868                | 4.858635  | -0.401832 |
| 7                | 7                | 0              | -0.137382               | 1.728112  | 1.155994  |
| 8                | 6                | 0              | -1.155029               | 3.859824  | 0.817085  |
| 9                | 1                | 0              | -1.189711               | 4.716560  | 1.494510  |
| 10               | 7                | 0              | 1.692033                | -1.975670 | 0.861448  |

|    |   |   |           |           |           |
|----|---|---|-----------|-----------|-----------|
| 11 | 6 | 0 | 3.069307  | -3.900714 | 0.860557  |
| 12 | 1 | 0 | 2.848263  | -4.613381 | 0.055137  |
| 13 | 7 | 0 | 3.733543  | -2.708270 | 0.292267  |
| 14 | 6 | 0 | 1.791361  | -3.302669 | 1.504796  |
| 15 | 1 | 0 | 1.981569  | -3.125357 | 2.574626  |
| 16 | 6 | 0 | 6.172957  | -2.582342 | 0.179871  |
| 17 | 1 | 0 | 6.184999  | -2.294013 | 1.229040  |
| 18 | 6 | 0 | 3.023533  | -0.307447 | -0.197247 |
| 19 | 6 | 0 | 3.995254  | 1.629426  | -1.273434 |
| 20 | 1 | 0 | 4.793125  | 2.069984  | -1.865428 |
| 21 | 6 | 0 | 4.953010  | -2.814963 | -0.454959 |
| 22 | 6 | 0 | 0.446141  | 5.235885  | -1.694384 |
| 23 | 1 | 0 | -0.313987 | 4.660252  | -2.216229 |
| 24 | 6 | 0 | 4.928407  | -3.190234 | -1.804246 |
| 25 | 1 | 0 | 3.976816  | -3.374861 | -2.296790 |
| 26 | 6 | 0 | 1.808814  | 5.601105  | 0.272383  |
| 27 | 1 | 0 | 2.100894  | 5.316277  | 1.279644  |
| 28 | 6 | 0 | 1.974679  | 0.520208  | 0.224053  |
| 29 | 6 | 0 | 4.054937  | 0.268880  | -0.957470 |
| 30 | 1 | 0 | 4.890892  | -0.326017 | -1.305769 |
| 31 | 6 | 0 | 2.933755  | 2.438704  | -0.854225 |
| 32 | 1 | 0 | 2.924602  | 3.487509  | -1.128519 |
| 33 | 6 | 0 | 1.900851  | 1.882414  | -0.081488 |
| 34 | 6 | 0 | 6.123504  | -3.310747 | -2.510636 |
| 35 | 1 | 0 | 6.096744  | -3.595759 | -3.559780 |
| 36 | 6 | 0 | 2.841126  | -1.689979 | 0.276021  |
| 37 | 6 | 0 | 2.407845  | 6.694275  | -0.354947 |
| 38 | 1 | 0 | 3.172823  | 7.257951  | 0.174160  |
| 39 | 6 | 0 | 1.045312  | 6.334209  | -2.306834 |
| 40 | 1 | 0 | 0.741431  | 6.613863  | -3.314098 |
| 41 | 6 | 0 | 7.361446  | -3.072439 | -1.889353 |
| 42 | 6 | 0 | 2.036914  | 7.081459  | -1.651525 |
| 43 | 6 | 0 | 7.365645  | -2.705808 | -0.536477 |
| 44 | 1 | 0 | 8.309971  | -2.515720 | -0.037159 |
| 45 | 6 | 0 | 8.648911  | -3.220691 | -2.663103 |
| 46 | 1 | 0 | 8.604271  | -2.682939 | -3.618769 |
| 47 | 1 | 0 | 8.851275  | -4.274347 | -2.896264 |
| 48 | 1 | 0 | 9.502327  | -2.835834 | -2.096140 |
| 49 | 6 | 0 | 2.671237  | 8.276239  | -2.320421 |
| 50 | 1 | 0 | 3.583182  | 8.586542  | -1.802555 |
| 51 | 1 | 0 | 1.985565  | 9.136029  | -2.327690 |
| 52 | 1 | 0 | 2.925804  | 8.062569  | -3.364505 |
| 53 | 1 | 0 | 3.723938  | -4.389075 | 1.586408  |
| 54 | 1 | 0 | -1.892501 | 4.019107  | 0.023389  |

|    |   |   |           |           |           |
|----|---|---|-----------|-----------|-----------|
| 55 | 6 | 0 | -1.612619 | 2.611592  | 3.076230  |
| 56 | 6 | 0 | 0.507502  | -4.168408 | 1.411346  |
| 57 | 6 | 0 | 0.793567  | -5.527497 | 2.081521  |
| 58 | 1 | 0 | -0.111665 | -6.145229 | 2.095651  |
| 59 | 1 | 0 | 1.567471  | -6.093021 | 1.545508  |
| 60 | 1 | 0 | 1.127565  | -5.398631 | 3.118818  |
| 61 | 6 | 0 | -0.619918 | -3.462093 | 2.187846  |
| 62 | 1 | 0 | -0.336483 | -3.292823 | 3.233702  |
| 63 | 1 | 0 | -0.876210 | -2.488740 | 1.747227  |
| 64 | 1 | 0 | -1.530181 | -4.074674 | 2.184433  |
| 65 | 6 | 0 | 0.070047  | -4.390499 | -0.046535 |
| 66 | 1 | 0 | -0.108439 | -3.437670 | -0.557051 |
| 67 | 1 | 0 | 0.818621  | -4.944509 | -0.625177 |
| 68 | 1 | 0 | -0.857714 | -4.974778 | -0.077429 |
| 69 | 6 | 0 | -1.883237 | 1.214076  | 3.666948  |
| 70 | 1 | 0 | -2.716836 | 0.722247  | 3.151416  |
| 71 | 1 | 0 | -1.003654 | 0.570055  | 3.594108  |
| 72 | 1 | 0 | -2.143432 | 1.300468  | 4.730987  |
| 73 | 6 | 0 | -2.885805 | 3.461954  | 3.278856  |
| 74 | 1 | 0 | -2.761882 | 4.495251  | 2.939720  |
| 75 | 1 | 0 | -3.742609 | 3.029095  | 2.744243  |
| 76 | 1 | 0 | -3.144448 | 3.498125  | 4.345077  |
| 77 | 6 | 0 | -0.423489 | 3.263556  | 3.805368  |
| 78 | 1 | 0 | -0.227706 | 4.281528  | 3.444301  |
| 79 | 1 | 0 | -0.632845 | 3.335536  | 4.879112  |
| 80 | 1 | 0 | 0.488863  | 2.671871  | 3.677328  |
| 81 | 8 | 0 | -0.391023 | -0.613343 | -0.745206 |
| 82 | 8 | 0 | -2.707004 | -0.540205 | 0.793677  |
| 83 | 6 | 0 | -1.507632 | -0.620911 | -1.268288 |
| 84 | 6 | 0 | -2.832443 | -0.582210 | -0.458263 |
| 85 | 8 | 0 | -1.660163 | -0.648639 | -2.574294 |
| 86 | 6 | 0 | -0.465336 | -0.637398 | -3.403917 |
| 87 | 1 | 0 | -0.837046 | -0.622616 | -4.427903 |
| 88 | 1 | 0 | 0.124582  | 0.256334  | -3.192598 |
| 89 | 1 | 0 | 0.121402  | -1.537322 | -3.217693 |
| 90 | 6 | 0 | -3.829738 | 0.457904  | -1.056075 |
| 91 | 9 | 0 | -3.201330 | 1.663447  | -1.128371 |
| 92 | 9 | 0 | -4.887035 | 0.599598  | -0.243755 |
| 93 | 9 | 0 | -4.287261 | 0.185110  | -2.290930 |
| 94 | 6 | 0 | -8.418430 | -1.621634 | -0.919509 |
| 95 | 6 | 0 | -7.199785 | -1.854913 | -0.292300 |
| 96 | 6 | 0 | -6.059148 | -2.227146 | -1.043423 |
| 97 | 6 | 0 | -6.197580 | -2.374267 | -2.444145 |
| 98 | 6 | 0 | -7.423857 | -2.160386 | -3.063066 |

|     |    |   |           |           |           |
|-----|----|---|-----------|-----------|-----------|
| 99  | 6  | 0 | -8.535490 | -1.777417 | -2.304639 |
| 100 | 1  | 0 | -9.278568 | -1.320425 | -0.328949 |
| 101 | 1  | 0 | -7.123449 | -1.712753 | 0.779940  |
| 102 | 1  | 0 | -5.352969 | -2.697754 | -3.042548 |
| 103 | 1  | 0 | -7.516414 | -2.296409 | -4.136526 |
| 104 | 1  | 0 | -9.492366 | -1.608451 | -2.790532 |
| 105 | 6  | 0 | -4.773066 | -2.459963 | -0.392476 |
| 106 | 6  | 0 | -4.668858 | -2.745851 | 1.060251  |
| 107 | 1  | 0 | -4.140780 | -1.877584 | 1.508886  |
| 108 | 1  | 0 | -5.617909 | -2.913802 | 1.567389  |
| 109 | 1  | 0 | -4.007219 | -3.601440 | 1.234574  |
| 110 | 6  | 0 | -3.548194 | -2.293522 | -1.070392 |
| 111 | 1  | 0 | -2.717451 | -2.879686 | -0.682511 |
| 112 | 1  | 0 | -3.557118 | -2.191001 | -2.149396 |
| 113 | 17 | 0 | 1.631794  | -0.027879 | 3.241615  |

**TS2S<sub>endo</sub>-Cl**

Imaginary frequency= -157.58

Total energy= -3138.44969544

Sum of electronic and zero-point Energies= -3137.521487

Sum of electronic and thermal Energies= -3137.462239

Sum of electronic and thermal Enthalpies= -3137.461295

Sum of electronic and thermal Free Energies= -3137.618482

| Center<br>Number | Atomic<br>Number | Atomic<br>Type | Coordinates (Angstroms) |           |           |
|------------------|------------------|----------------|-------------------------|-----------|-----------|
|                  |                  |                | X                       | Y         | Z         |
| 1                | 45               | 0              | 0.550004                | -0.208461 | 1.199317  |
| 2                | 6                | 0              | -1.553330               | 2.387947  | 1.628109  |
| 3                | 1                | 0              | -2.360037               | 1.808149  | 1.163252  |
| 4                | 7                | 0              | -0.144242               | 3.792190  | 0.311795  |
| 5                | 6                | 0              | 0.446289                | 2.594146  | 0.517196  |
| 6                | 6                | 0              | 0.324362                | 4.918526  | -0.435831 |
| 7                | 7                | 0              | -0.267055               | 1.752712  | 1.244171  |
| 8                | 6                | 0              | -1.467933               | 3.796146  | 0.960933  |
| 9                | 1                | 0              | -1.516546               | 4.616338  | 1.682076  |
| 10               | 7                | 0              | 1.882610                | -1.789982 | 0.809904  |
| 11               | 6                | 0              | 3.487721                | -3.542649 | 0.813424  |
| 12               | 1                | 0              | 3.380093                | -4.285515 | 0.014559  |
| 13               | 7                | 0              | 4.000228                | -2.280928 | 0.241992  |
| 14               | 6                | 0              | 2.128107                | -3.115430 | 1.429870  |
| 15               | 1                | 0              | 2.265145                | -2.941204 | 2.506216  |
| 16               | 6                | 0              | 6.425339                | -1.966151 | 0.194365  |

|    |   |   |           |           |           |
|----|---|---|-----------|-----------|-----------|
| 17 | 1 | 0 | 6.395694  | -1.749564 | 1.258410  |
| 18 | 6 | 0 | 3.050359  | 0.038699  | -0.187371 |
| 19 | 6 | 0 | 3.864862  | 2.098708  | -1.161704 |
| 20 | 1 | 0 | 4.632676  | 2.633812  | -1.711749 |
| 21 | 6 | 0 | 5.233587  | -2.242972 | -0.485593 |
| 22 | 6 | 0 | -0.026793 | 5.055460  | -1.782246 |
| 23 | 1 | 0 | -0.626371 | 4.286746  | -2.262167 |
| 24 | 6 | 0 | 5.264135  | -2.527862 | -1.854268 |
| 25 | 1 | 0 | 4.341108  | -2.752596 | -2.381741 |
| 26 | 6 | 0 | 1.084605  | 5.914506  | 0.189149  |
| 27 | 1 | 0 | 1.345365  | 5.811472  | 1.238726  |
| 28 | 6 | 0 | 1.924335  | 0.746886  | 0.247245  |
| 29 | 6 | 0 | 4.038737  | 0.735710  | -0.901042 |
| 30 | 1 | 0 | 4.932353  | 0.234761  | -1.253474 |
| 31 | 6 | 0 | 2.726339  | 2.789872  | -0.734587 |
| 32 | 1 | 0 | 2.628064  | 3.844822  | -0.960418 |
| 33 | 6 | 0 | 1.731802  | 2.107558  | -0.014800 |
| 34 | 6 | 0 | 6.481552  | -2.516665 | -2.538044 |
| 35 | 1 | 0 | 6.495818  | -2.733771 | -3.603199 |
| 36 | 6 | 0 | 3.001733  | -1.368322 | 0.243636  |
| 37 | 6 | 0 | 1.504632  | 7.025763  | -0.540222 |
| 38 | 1 | 0 | 2.098487  | 7.792560  | -0.048581 |
| 39 | 6 | 0 | 0.396470  | 6.174428  | -2.501172 |
| 40 | 1 | 0 | 0.120749  | 6.270721  | -3.548363 |
| 41 | 6 | 0 | 7.684319  | -2.234799 | -1.875243 |
| 42 | 6 | 0 | 1.170826  | 7.174533  | -1.896337 |
| 43 | 6 | 0 | 7.634357  | -1.961026 | -0.498421 |
| 44 | 1 | 0 | 8.554354  | -1.739648 | 0.037500  |
| 45 | 6 | 0 | 9.001834  | -2.230055 | -2.612488 |
| 46 | 1 | 0 | 9.509943  | -1.262678 | -2.513590 |
| 47 | 1 | 0 | 8.864136  | -2.432138 | -3.679323 |
| 48 | 1 | 0 | 9.683747  | -2.990291 | -2.210836 |
| 49 | 6 | 0 | 1.646036  | 8.375050  | -2.678483 |
| 50 | 1 | 0 | 1.474416  | 9.305461  | -2.124757 |
| 51 | 1 | 0 | 1.134568  | 8.452517  | -3.643084 |
| 52 | 1 | 0 | 2.724257  | 8.315752  | -2.877605 |
| 53 | 1 | 0 | 4.185865  | -3.932430 | 1.557238  |
| 54 | 1 | 0 | -2.250028 | 3.954651  | 0.211233  |
| 55 | 6 | 0 | -1.850902 | 2.426489  | 3.160691  |
| 56 | 6 | 0 | 0.981225  | -4.149304 | 1.277426  |
| 57 | 6 | 0 | 1.447160  | -5.474464 | 1.914254  |
| 58 | 1 | 0 | 0.628719  | -6.204173 | 1.908022  |
| 59 | 1 | 0 | 2.288196  | -5.920657 | 1.369951  |
| 60 | 1 | 0 | 1.756519  | -5.328819 | 2.956966  |

|     |   |   |           |           |           |
|-----|---|---|-----------|-----------|-----------|
| 61  | 6 | 0 | -0.251160 | -3.644963 | 2.050699  |
| 62  | 1 | 0 | -0.013965 | -3.492718 | 3.111545  |
| 63  | 1 | 0 | -0.631507 | -2.698521 | 1.650054  |
| 64  | 1 | 0 | -1.065970 | -4.376727 | 1.991949  |
| 65  | 6 | 0 | 0.614874  | -4.388109 | -0.197799 |
| 66  | 1 | 0 | 0.282909  | -3.464685 | -0.683447 |
| 67  | 1 | 0 | 1.459906  | -4.786623 | -0.771634 |
| 68  | 1 | 0 | -0.199986 | -5.116822 | -0.270122 |
| 69  | 6 | 0 | -2.012469 | 0.991423  | 3.696664  |
| 70  | 1 | 0 | -2.806445 | 0.453518  | 3.166214  |
| 71  | 1 | 0 | -1.086203 | 0.418637  | 3.599856  |
| 72  | 1 | 0 | -2.276975 | 1.016979  | 4.761317  |
| 73  | 6 | 0 | -3.189465 | 3.166274  | 3.369091  |
| 74  | 1 | 0 | -3.137390 | 4.222188  | 3.079610  |
| 75  | 1 | 0 | -3.999124 | 2.697898  | 2.794451  |
| 76  | 1 | 0 | -3.472966 | 3.133155  | 4.427640  |
| 77  | 6 | 0 | -0.733631 | 3.142423  | 3.938738  |
| 78  | 1 | 0 | -0.605548 | 4.183435  | 3.616887  |
| 79  | 1 | 0 | -0.974625 | 3.161352  | 5.008565  |
| 80  | 1 | 0 | 0.223352  | 2.624001  | 3.819863  |
| 81  | 8 | 0 | -0.388040 | -0.538576 | -0.720125 |
| 82  | 8 | 0 | -2.533813 | -1.232651 | 0.896173  |
| 83  | 6 | 0 | -1.421402 | -1.008763 | -1.197018 |
| 84  | 6 | 0 | -2.664254 | -1.371813 | -0.342204 |
| 85  | 8 | 0 | -1.551720 | -1.250476 | -2.482243 |
| 86  | 6 | 0 | -0.427741 | -0.955995 | -3.357915 |
| 87  | 1 | 0 | -0.756211 | -1.268209 | -4.347987 |
| 88  | 1 | 0 | -0.217419 | 0.115381  | -3.338947 |
| 89  | 1 | 0 | 0.449812  | -1.523314 | -3.043032 |
| 90  | 6 | 0 | -3.351575 | -2.698394 | -0.786955 |
| 91  | 9 | 0 | -3.829057 | -2.709370 | -2.043691 |
| 92  | 9 | 0 | -4.366023 | -2.982254 | 0.045321  |
| 93  | 9 | 0 | -2.450078 | -3.706292 | -0.693185 |
| 94  | 6 | 0 | -8.297701 | -2.090401 | -1.076819 |
| 95  | 6 | 0 | -7.239102 | -1.462503 | -0.429242 |
| 96  | 6 | 0 | -6.231355 | -0.799255 | -1.166883 |
| 97  | 6 | 0 | -6.341161 | -0.775505 | -2.576754 |
| 98  | 6 | 0 | -7.412925 | -1.386733 | -3.218197 |
| 99  | 6 | 0 | -8.391792 | -2.050402 | -2.471681 |
| 100 | 1 | 0 | -9.052124 | -2.610711 | -0.494081 |
| 101 | 1 | 0 | -7.175965 | -1.519027 | 0.651782  |
| 102 | 1 | 0 | -5.604319 | -0.243077 | -3.168365 |
| 103 | 1 | 0 | -7.489069 | -1.342648 | -4.300664 |
| 104 | 1 | 0 | -9.227042 | -2.529959 | -2.974177 |

|     |    |   |           |           |           |
|-----|----|---|-----------|-----------|-----------|
| 105 | 6  | 0 | -5.107477 | -0.152371 | -0.491232 |
| 106 | 6  | 0 | -5.187812 | 0.236170  | 0.944806  |
| 107 | 1  | 0 | -4.860854 | 1.273858  | 1.072933  |
| 108 | 1  | 0 | -6.174857 | 0.121052  | 1.391085  |
| 109 | 1  | 0 | -4.451339 | -0.379653 | 1.495682  |
| 110 | 6  | 0 | -3.862918 | 0.030318  | -1.111465 |
| 111 | 1  | 0 | -3.247894 | 0.837488  | -0.719739 |
| 112 | 1  | 0 | -3.775286 | -0.136813 | -2.180149 |
| 113 | 17 | 0 | 1.653392  | 0.065951  | 3.252425  |

---

### TS2R<sub>exo</sub>-CI

Imaginary frequency= -101.01

Total energy= -3138.45284327

Sum of electronic and zero-point Energies= -3137.523796

Sum of electronic and thermal Energies= -3137.464644

Sum of electronic and thermal Enthalpies= -3137.463700

Sum of electronic and thermal Free Energies= -3137.619759

---

| Center<br>Number | Atomic<br>Number | Atomic<br>Type | Coordinates (Angstroms) |           |           |
|------------------|------------------|----------------|-------------------------|-----------|-----------|
|                  |                  |                | X                       | Y         | Z         |
| 1                | 45               | 0              | 0.393317                | -0.257260 | 1.223486  |
| 2                | 6                | 0              | -2.164207               | 1.795213  | 2.073380  |
| 3                | 1                | 0              | -2.885767               | 0.982325  | 1.942167  |
| 4                | 7                | 0              | -1.506343               | 3.346796  | 0.380698  |
| 5                | 6                | 0              | -0.601479               | 2.343592  | 0.473556  |
| 6                | 6                | 0              | -1.363823               | 4.627824  | -0.235811 |
| 7                | 7                | 0              | -0.909575               | 1.411826  | 1.361422  |
| 8                | 6                | 0              | -2.639978               | 3.049227  | 1.277832  |
| 9                | 1                | 0              | -2.830144               | 3.914322  | 1.915207  |
| 10               | 7                | 0              | 2.097385                | -1.457854 | 0.670669  |
| 11               | 6                | 0              | 4.334105                | -2.327983 | 0.771338  |
| 12               | 1                | 0              | 4.660667                | -3.210784 | 0.214446  |
| 13               | 7                | 0              | 4.179549                | -1.195542 | -0.152975 |
| 14               | 6                | 0              | 2.911255                | -2.486669 | 1.388313  |
| 15               | 1                | 0              | 2.933928                | -2.188628 | 2.443145  |
| 16               | 6                | 0              | 6.138951                | 0.256831  | -0.394321 |
| 17               | 1                | 0              | 5.943313                | 0.661766  | 0.594518  |
| 18               | 6                | 0              | 2.392673                | 0.491294  | -0.702788 |
| 19               | 6                | 0              | 2.275635                | 2.487658  | -2.062483 |
| 20               | 1                | 0              | 2.676565                | 3.099458  | -2.864581 |
| 21               | 6                | 0              | 5.280679                | -0.710471 | -0.928321 |
| 22               | 6                | 0              | -0.388242               | 5.531413  | 0.207601  |



|    |   |   |           |           |           |
|----|---|---|-----------|-----------|-----------|
| 23 | 1 | 0 | 0.285196  | 5.246467  | 1.010636  |
| 24 | 6 | 0 | 5.537482  | -1.246983 | -2.194433 |
| 25 | 1 | 0 | 4.876410  | -2.008203 | -2.599374 |
| 26 | 6 | 0 | -2.246533 | 5.007205  | -1.251583 |
| 27 | 1 | 0 | -3.007772 | 4.311828  | -1.593427 |
| 28 | 6 | 0 | 1.235597  | 0.919286  | -0.048195 |
| 29 | 6 | 0 | 2.919281  | 1.291828  | -1.728779 |
| 30 | 1 | 0 | 3.807520  | 0.993384  | -2.272524 |
| 31 | 6 | 0 | 1.130656  | 2.918185  | -1.384985 |
| 32 | 1 | 0 | 0.663766  | 3.852100  | -1.672871 |
| 33 | 6 | 0 | 0.602125  | 2.131908  | -0.348043 |
| 34 | 6 | 0 | 6.637533  | -0.800050 | -2.927132 |
| 35 | 1 | 0 | 6.828794  | -1.220765 | -3.911205 |
| 36 | 6 | 0 | 2.905658  | -0.756346 | -0.113934 |
| 37 | 6 | 0 | -2.142531 | 6.274693  | -1.827176 |
| 38 | 1 | 0 | -2.833354 | 6.557955  | -2.617300 |
| 39 | 6 | 0 | -0.286533 | 6.788412  | -0.385147 |
| 40 | 1 | 0 | 0.477986  | 7.478739  | -0.036572 |
| 41 | 6 | 0 | 7.502540  | 0.177924  | -2.413413 |
| 42 | 6 | 0 | -1.160284 | 7.183970  | -1.411111 |
| 43 | 6 | 0 | 7.236386  | 0.693793  | -1.135769 |
| 44 | 1 | 0 | 7.898050  | 1.446889  | -0.714997 |
| 45 | 6 | 0 | 8.674862  | 0.679749  | -3.221205 |
| 46 | 1 | 0 | 8.398947  | 1.569042  | -3.804329 |
| 47 | 1 | 0 | 9.027082  | -0.077518 | -3.929467 |
| 48 | 1 | 0 | 9.513448  | 0.963240  | -2.576043 |
| 49 | 6 | 0 | -1.035301 | 8.548325  | -2.045478 |
| 50 | 1 | 0 | -1.857244 | 8.743262  | -2.741425 |
| 51 | 1 | 0 | -0.094691 | 8.641854  | -2.603672 |
| 52 | 1 | 0 | -1.036216 | 9.341062  | -1.287578 |
| 53 | 1 | 0 | 5.097748  | -2.095557 | 1.519676  |
| 54 | 1 | 0 | -3.543425 | 2.852174  | 0.691074  |
| 55 | 6 | 0 | -2.053797 | 2.041888  | 3.615683  |
| 56 | 6 | 0 | 2.397390  | -3.957853 | 1.340963  |
| 57 | 6 | 0 | 3.416909  | -4.834357 | 2.101816  |
| 58 | 1 | 0 | 3.053820  | -5.867498 | 2.155855  |
| 59 | 1 | 0 | 4.398398  | -4.860186 | 1.615346  |
| 60 | 1 | 0 | 3.557848  | -4.476767 | 3.129941  |
| 61 | 6 | 0 | 1.050340  | -4.071806 | 2.071017  |
| 62 | 1 | 0 | 1.102937  | -3.645696 | 3.080708  |
| 63 | 1 | 0 | 0.262132  | -3.557337 | 1.524170  |
| 64 | 1 | 0 | 0.756167  | -5.124645 | 2.163050  |
| 65 | 6 | 0 | 2.241894  | -4.467792 | -0.102508 |
| 66 | 1 | 0 | 1.528015  | -3.858692 | -0.665437 |

|     |   |   |           |           |           |
|-----|---|---|-----------|-----------|-----------|
| 67  | 1 | 0 | 3.192637  | -4.466109 | -0.648077 |
| 68  | 1 | 0 | 1.871631  | -5.500154 | -0.099256 |
| 69  | 6 | 0 | -1.682001 | 0.739044  | 4.345629  |
| 70  | 1 | 0 | -2.412772 | -0.052239 | 4.141935  |
| 71  | 1 | 0 | -0.694218 | 0.377306  | 4.055756  |
| 72  | 1 | 0 | -1.672538 | 0.912072  | 5.429323  |
| 73  | 6 | 0 | -3.449661 | 2.470277  | 4.121306  |
| 74  | 1 | 0 | -3.773330 | 3.435458  | 3.716832  |
| 75  | 1 | 0 | -4.213407 | 1.723924  | 3.865928  |
| 76  | 1 | 0 | -3.433356 | 2.566324  | 5.213181  |
| 77  | 6 | 0 | -1.021733 | 3.132559  | 3.950653  |
| 78  | 1 | 0 | -1.257452 | 4.090272  | 3.470290  |
| 79  | 1 | 0 | -1.004483 | 3.311036  | 5.032849  |
| 80  | 1 | 0 | -0.014707 | 2.830395  | 3.646199  |
| 81  | 8 | 0 | -1.279592 | -1.693755 | 2.255233  |
| 82  | 8 | 0 | -0.742328 | -1.196394 | -0.331849 |
| 83  | 6 | 0 | -1.977490 | -2.236904 | 1.408394  |
| 84  | 6 | 0 | -1.702557 | -1.968679 | -0.075225 |
| 85  | 8 | 0 | -2.946134 | -3.091647 | 1.648945  |
| 86  | 6 | 0 | -3.184638 | -3.451175 | 3.040161  |
| 87  | 1 | 0 | -3.956959 | -4.217685 | 3.002988  |
| 88  | 1 | 0 | -2.266642 | -3.842068 | 3.482359  |
| 89  | 1 | 0 | -3.532825 | -2.575108 | 3.590809  |
| 90  | 6 | 0 | -1.901087 | -3.131476 | -1.071977 |
| 91  | 9 | 0 | -0.997030 | -4.093445 | -0.771431 |
| 92  | 9 | 0 | -1.658077 | -2.721060 | -2.324535 |
| 93  | 9 | 0 | -3.111821 | -3.696094 | -1.026755 |
| 94  | 6 | 0 | -5.187670 | -2.700769 | -4.677930 |
| 95  | 6 | 0 | -4.350516 | -1.874034 | -3.934663 |
| 96  | 6 | 0 | -4.636304 | -1.584507 | -2.581958 |
| 97  | 6 | 0 | -5.805407 | -2.139213 | -2.012676 |
| 98  | 6 | 0 | -6.649947 | -2.948434 | -2.765233 |
| 99  | 6 | 0 | -6.341757 | -3.236994 | -4.098700 |
| 100 | 1 | 0 | -4.940689 | -2.926639 | -5.711205 |
| 101 | 1 | 0 | -3.452233 | -1.481111 | -4.397605 |
| 102 | 1 | 0 | -6.072103 | -1.903060 | -0.987883 |
| 103 | 1 | 0 | -7.552502 | -3.351008 | -2.314619 |
| 104 | 1 | 0 | -7.000505 | -3.871737 | -4.684730 |
| 105 | 6 | 0 | -3.746937 | -0.731880 | -1.784458 |
| 106 | 6 | 0 | -2.880122 | 0.297290  | -2.453317 |
| 107 | 1 | 0 | -3.036888 | 0.366302  | -3.529599 |
| 108 | 1 | 0 | -3.080241 | 1.283036  | -2.018199 |
| 109 | 1 | 0 | -1.819871 | 0.079621  | -2.261918 |
| 110 | 6 | 0 | -3.656333 | -0.864109 | -0.408324 |

|     |    |   |           |           |          |
|-----|----|---|-----------|-----------|----------|
| 111 | 1  | 0 | -3.229798 | -0.047209 | 0.162571 |
| 112 | 1  | 0 | -4.321108 | -1.532277 | 0.127263 |
| 113 | 17 | 0 | 1.737890  | 0.559503  | 2.970151 |

---

**TS2S<sub>exo</sub>-Cl**

Imaginary frequency= -96.39

Total energy= -3138.45480900

Sum of electronic and zero-point Energies= -3137.525838

Sum of electronic and thermal Energies= -3137.466560

Sum of electronic and thermal Enthalpies= -3137.465616

Sum of electronic and thermal Free Energies= -3137.623811

---

| Center<br>Number | Atomic<br>Number | Atomic<br>Type | Coordinates (Angstroms) |           |           |
|------------------|------------------|----------------|-------------------------|-----------|-----------|
|                  |                  |                | X                       | Y         | Z         |
| 1                | 45               | 0              | -0.373030               | 0.052593  | -1.389718 |
| 2                | 6                | 0              | 2.430649                | 1.803468  | -2.040726 |
| 3                | 1                | 0              | 2.993138                | 0.865318  | -1.990902 |
| 4                | 7                | 0              | 1.952595                | 3.271021  | -0.223960 |
| 5                | 6                | 0              | 0.908811                | 2.439518  | -0.437817 |
| 6                | 6                | 0              | 2.159434                | 4.179160  | 0.863734  |
| 7                | 7                | 0              | 1.092655                | 1.579029  | -1.426247 |
| 8                | 6                | 0              | 3.075849                | 2.849356  | -1.081538 |
| 9                | 1                | 0              | 3.486828                | 3.716797  | -1.601235 |
| 10               | 7                | 0              | -2.183066               | -1.010046 | -0.908965 |
| 11               | 6                | 0              | -4.464806               | -1.733552 | -1.016284 |
| 12               | 1                | 0              | -4.746072               | -2.610898 | -0.424103 |
| 13               | 7                | 0              | -4.253958               | -0.585735 | -0.121909 |
| 14               | 6                | 0              | -3.085465               | -1.890345 | -1.714963 |
| 15               | 1                | 0              | -3.136658               | -1.441281 | -2.715163 |
| 16               | 6                | 0              | -6.120531               | 0.961325  | 0.218994  |
| 17               | 1                | 0              | -5.913595               | 1.397789  | -0.753964 |
| 18               | 6                | 0              | -2.335127               | 0.914823  | 0.524956  |
| 19               | 6                | 0              | -2.074791               | 2.860484  | 1.939770  |
| 20               | 1                | 0              | -2.453844               | 3.500488  | 2.730457  |
| 21               | 6                | 0              | -5.312824               | -0.075435 | 0.695957  |
| 22               | 6                | 0              | 1.931702                | 5.545664  | 0.682473  |
| 23               | 1                | 0              | 1.563497                | 5.904894  | -0.274228 |
| 24               | 6                | 0              | -5.575024               | -0.644208 | 1.947615  |
| 25               | 1                | 0              | -4.948619               | -1.452673 | 2.314368  |
| 26               | 6                | 0              | 2.637623                | 3.708205  | 2.092927  |
| 27               | 1                | 0              | 2.820007                | 2.645321  | 2.227925  |
| 28               | 6                | 0              | -1.112782               | 1.238530  | -0.067610 |

|    |   |   |           |           |           |
|----|---|---|-----------|-----------|-----------|
| 29 | 6 | 0 | -2.820350 | 1.743417  | 1.550315  |
| 30 | 1 | 0 | -3.759706 | 1.530562  | 2.046404  |
| 31 | 6 | 0 | -0.851749 | 3.174240  | 1.337501  |
| 32 | 1 | 0 | -0.305309 | 4.050324  | 1.665312  |
| 33 | 6 | 0 | -0.352870 | 2.349903  | 0.316554  |
| 34 | 6 | 0 | -6.632001 | -0.162878 | 2.719607  |
| 35 | 1 | 0 | -6.824046 | -0.604741 | 3.694362  |
| 36 | 6 | 0 | -2.944811 | -0.261230 | -0.117673 |
| 37 | 6 | 0 | 2.868450  | 4.604836  | 3.134778  |
| 38 | 1 | 0 | 3.232213  | 4.231266  | 4.089048  |
| 39 | 6 | 0 | 2.165288  | 6.433534  | 1.734245  |
| 40 | 1 | 0 | 1.976340  | 7.494043  | 1.588119  |
| 41 | 6 | 0 | -7.450544 | 0.881032  | 2.260353  |
| 42 | 6 | 0 | 2.638674  | 5.981068  | 2.974021  |
| 43 | 6 | 0 | -7.174946 | 1.434001  | 1.000986  |
| 44 | 1 | 0 | -7.792262 | 2.246878  | 0.626914  |
| 45 | 6 | 0 | -8.610926 | 1.376206  | 3.089205  |
| 46 | 1 | 0 | -8.873309 | 2.408081  | 2.833506  |
| 47 | 1 | 0 | -8.385277 | 1.333811  | 4.160374  |
| 48 | 1 | 0 | -9.504885 | 0.760221  | 2.922040  |
| 49 | 6 | 0 | 2.916046  | 6.945300  | 4.102087  |
| 50 | 1 | 0 | 2.565073  | 6.550345  | 5.062389  |
| 51 | 1 | 0 | 2.430169  | 7.911287  | 3.931179  |
| 52 | 1 | 0 | 3.993485  | 7.131372  | 4.205940  |
| 53 | 1 | 0 | -5.274271 | -1.518873 | -1.718241 |
| 54 | 1 | 0 | 3.865613  | 2.413015  | -0.460349 |
| 55 | 6 | 0 | 2.427086  | 2.243582  | -3.541964 |
| 56 | 6 | 0 | -2.660231 | -3.374582 | -1.904559 |
| 57 | 6 | 0 | -3.763379 | -4.077557 | -2.725180 |
| 58 | 1 | 0 | -3.468822 | -5.111566 | -2.941003 |
| 59 | 1 | 0 | -4.719699 | -4.115564 | -2.190582 |
| 60 | 1 | 0 | -3.929742 | -3.571829 | -3.684775 |
| 61 | 6 | 0 | -1.352948 | -3.442288 | -2.708589 |
| 62 | 1 | 0 | -1.440921 | -2.903616 | -3.660561 |
| 63 | 1 | 0 | -0.518648 | -3.004967 | -2.158731 |
| 64 | 1 | 0 | -1.099683 | -4.485282 | -2.936107 |
| 65 | 6 | 0 | -2.475694 | -4.102223 | -0.561636 |
| 66 | 1 | 0 | -1.772168 | -3.568897 | 0.085670  |
| 67 | 1 | 0 | -3.417654 | -4.210664 | -0.011181 |
| 68 | 1 | 0 | -2.081928 | -5.112026 | -0.728824 |
| 69 | 6 | 0 | 1.842697  | 1.125332  | -4.423127 |
| 70 | 1 | 0 | 2.394995  | 0.186818  | -4.295593 |
| 71 | 1 | 0 | 0.791593  | 0.935787  | -4.195168 |
| 72 | 1 | 0 | 1.911675  | 1.411057  | -5.480540 |

|     |    |   |           |           |           |
|-----|----|---|-----------|-----------|-----------|
| 73  | 6  | 0 | 3.894341  | 2.459292  | -3.973321 |
| 74  | 1  | 0 | 4.374323  | 3.293878  | -3.450502 |
| 75  | 1  | 0 | 4.497367  | 1.559140  | -3.795524 |
| 76  | 1  | 0 | 3.936817  | 2.680475  | -5.046193 |
| 77  | 6  | 0 | 1.623139  | 3.537789  | -3.758275 |
| 78  | 1  | 0 | 2.008739  | 4.371754  | -3.159309 |
| 79  | 1  | 0 | 1.677739  | 3.841371  | -4.810886 |
| 80  | 1  | 0 | 0.566298  | 3.395218  | -3.509487 |
| 81  | 8  | 0 | 1.243972  | -1.496118 | -2.443445 |
| 82  | 8  | 0 | 0.860511  | -0.805029 | 0.130806  |
| 83  | 6  | 0 | 2.074735  | -1.853013 | -1.618881 |
| 84  | 6  | 0 | 1.858577  | -1.516917 | -0.139995 |
| 85  | 8  | 0 | 3.192082  | -2.494677 | -1.880552 |
| 86  | 6  | 0 | 3.463852  | -2.819078 | -3.274741 |
| 87  | 1  | 0 | 4.395444  | -3.381885 | -3.254193 |
| 88  | 1  | 0 | 2.649819  | -3.424071 | -3.678309 |
| 89  | 1  | 0 | 3.578457  | -1.898496 | -3.850310 |
| 90  | 6  | 0 | 3.102706  | -1.276661 | 0.741921  |
| 91  | 9  | 0 | 3.985945  | -2.278738 | 0.747242  |
| 92  | 9  | 0 | 2.742506  | -1.007255 | 2.003516  |
| 93  | 9  | 0 | 3.735708  | -0.180278 | 0.252455  |
| 94  | 6  | 0 | 3.524741  | -4.281979 | 4.828749  |
| 95  | 6  | 0 | 2.505773  | -3.792434 | 4.017011  |
| 96  | 6  | 0 | 2.424257  | -4.157064 | 2.654427  |
| 97  | 6  | 0 | 3.395410  | -5.050459 | 2.146604  |
| 98  | 6  | 0 | 4.408160  | -5.543293 | 2.961926  |
| 99  | 6  | 0 | 4.480021  | -5.157978 | 4.304796  |
| 100 | 1  | 0 | 3.574299  | -3.980489 | 5.870973  |
| 101 | 1  | 0 | 1.777734  | -3.110146 | 4.440847  |
| 102 | 1  | 0 | 3.340387  | -5.383985 | 1.116342  |
| 103 | 1  | 0 | 5.138772  | -6.235616 | 2.553828  |
| 104 | 1  | 0 | 5.271993  | -5.544157 | 4.940382  |
| 105 | 6  | 0 | 1.343987  | -3.639462 | 1.804908  |
| 106 | 6  | 0 | 0.144363  | -3.015446 | 2.459941  |
| 107 | 1  | 0 | -0.322544 | -3.716686 | 3.162202  |
| 108 | 1  | 0 | 0.434079  | -2.130402 | 3.039652  |
| 109 | 1  | 0 | -0.600360 | -2.710135 | 1.724129  |
| 110 | 6  | 0 | 1.401841  | -3.677426 | 0.423014  |
| 111 | 1  | 0 | 0.476904  | -3.571402 | -0.133631 |
| 112 | 1  | 0 | 2.214122  | -4.178965 | -0.090962 |
| 113 | 17 | 0 | -1.619268 | 1.068301  | -3.102664 |

-----  
**M1<sub>endo</sub>-BF<sub>4</sub>**

Total energy= -2753.71060145

Sum of electronic and zero-point Energies= -2752.930516  
 Sum of electronic and thermal Energies= -2752.877441  
 Sum of electronic and thermal Enthalpies= -2752.876497  
 Sum of electronic and thermal Free Energies= -2753.018706

---

| Center<br>Number | Atomic<br>Number | Atomic<br>Type | Coordinates (Angstroms) |           |           |
|------------------|------------------|----------------|-------------------------|-----------|-----------|
|                  |                  |                | X                       | Y         | Z         |
| 1                | 45               | 0              | 0.038414                | -0.946398 | 0.423702  |
| 2                | 6                | 0              | -3.228337               | -0.594179 | 1.115948  |
| 3                | 1                | 0              | -3.538827               | -1.423251 | 0.469851  |
| 4                | 7                | 0              | -3.191163               | 1.653544  | 0.308774  |
| 5                | 6                | 0              | -1.957301               | 1.119795  | 0.247170  |
| 6                | 6                | 0              | -3.613012               | 2.983595  | -0.013986 |
| 7                | 7                | 0              | -1.886914               | -0.133969 | 0.671853  |
| 8                | 6                | 0              | -4.134265               | 0.643324  | 0.830104  |
| 9                | 1                | 0              | -4.627495               | 1.032877  | 1.724370  |
| 10               | 7                | 0              | 2.071677                | -1.105068 | -0.025035 |
| 11               | 6                | 0              | 4.419875                | -1.345829 | -0.226202 |
| 12               | 1                | 0              | 4.784534                | -1.788943 | -1.159518 |
| 13               | 7                | 0              | 3.944987                | 0.034130  | -0.482402 |
| 14               | 6                | 0              | 3.154041                | -2.053724 | 0.332120  |
| 15               | 1                | 0              | 3.211612                | -2.077807 | 1.425890  |
| 16               | 6                | 0              | 4.989459                | 2.009405  | 0.515082  |
| 17               | 1                | 0              | 4.412933                | 1.833020  | 1.418362  |
| 18               | 6                | 0              | 1.671736                | 1.182840  | -0.568809 |
| 19               | 6                | 0              | 0.831131                | 3.379689  | -1.135613 |
| 20               | 1                | 0              | 1.011921                | 4.380001  | -1.516110 |
| 21               | 6                | 0              | 4.837979                | 1.147547  | -0.575904 |
| 22               | 6                | 0              | -4.120871               | 3.262662  | -1.287978 |
| 23               | 1                | 0              | -4.169764               | 2.472711  | -2.032494 |
| 24               | 6                | 0              | 5.592662                | 1.348180  | -1.737381 |
| 25               | 1                | 0              | 5.475259                | 0.673173  | -2.580481 |
| 26               | 6                | 0              | -3.551753               | 3.993543  | 0.950343  |
| 27               | 1                | 0              | -3.161503               | 3.770931  | 1.939374  |
| 28               | 6                | 0              | 0.370112                | 0.854439  | -0.184999 |
| 29               | 6                | 0              | 1.898562                | 2.478035  | -1.060621 |
| 30               | 1                | 0              | 2.885889                | 2.787433  | -1.383048 |
| 31               | 6                | 0              | -0.461810               | 3.032994  | -0.728728 |
| 32               | 1                | 0              | -1.257261               | 3.765152  | -0.797383 |
| 33               | 6                | 0              | -0.708150               | 1.738990  | -0.238968 |
| 34               | 6                | 0              | 6.484129                | 2.417283  | -1.804558 |
| 35               | 1                | 0              | 7.064910                | 2.570046  | -2.711139 |
| 36               | 6                | 0              | 2.601850                | 0.054238  | -0.376709 |

|    |   |   |           |           |           |
|----|---|---|-----------|-----------|-----------|
| 37 | 6 | 0 | -3.978142 | 5.283078  | 0.628764  |
| 38 | 1 | 0 | -3.916678 | 6.067044  | 1.379351  |
| 39 | 6 | 0 | -4.545355 | 4.554119  | -1.595762 |
| 40 | 1 | 0 | -4.930139 | 4.766564  | -2.590308 |
| 41 | 6 | 0 | 6.638378  | 3.305648  | -0.727194 |
| 42 | 6 | 0 | -4.478383 | 5.586179  | -0.645689 |
| 43 | 6 | 0 | 5.878432  | 3.082041  | 0.429377  |
| 44 | 1 | 0 | 5.986074  | 3.752321  | 1.278469  |
| 45 | 6 | 0 | 7.611181  | 4.456893  | -0.813934 |
| 46 | 1 | 0 | 7.414277  | 5.080250  | -1.694690 |
| 47 | 1 | 0 | 8.644149  | 4.096288  | -0.901794 |
| 48 | 1 | 0 | 7.554362  | 5.095490  | 0.073016  |
| 49 | 6 | 0 | -4.954803 | 6.977239  | -0.986101 |
| 50 | 1 | 0 | -4.597125 | 7.711401  | -0.257391 |
| 51 | 1 | 0 | -6.051876 | 7.026055  | -0.994633 |
| 52 | 1 | 0 | -4.612035 | 7.284867  | -1.980767 |
| 53 | 1 | 0 | 5.237896  | -1.327358 | 0.496554  |
| 54 | 1 | 0 | -4.901305 | 0.432490  | 0.078779  |
| 55 | 6 | 0 | -3.291386 | -1.135268 | 2.576734  |
| 56 | 6 | 0 | 2.917897  | -3.511543 | -0.142068 |
| 57 | 6 | 0 | 4.167282  | -4.341994 | 0.215156  |
| 58 | 1 | 0 | 3.998243  | -5.400272 | -0.016464 |
| 59 | 1 | 0 | 5.049818  | -4.018340 | -0.349398 |
| 60 | 1 | 0 | 4.402112  | -4.268095 | 1.284336  |
| 61 | 6 | 0 | 1.711916  | -4.082274 | 0.630544  |
| 62 | 1 | 0 | 1.902086  | -4.087162 | 1.710513  |
| 63 | 1 | 0 | 0.798156  | -3.500097 | 0.450634  |
| 64 | 1 | 0 | 1.507319  | -5.114347 | 0.320655  |
| 65 | 6 | 0 | 2.652687  | -3.596366 | -1.654636 |
| 66 | 1 | 0 | 1.752014  | -3.038854 | -1.934382 |
| 67 | 1 | 0 | 3.488286  | -3.201183 | -2.244571 |
| 68 | 1 | 0 | 2.508203  | -4.641602 | -1.953284 |
| 69 | 6 | 0 | -2.390277 | -2.378844 | 2.694954  |
| 70 | 1 | 0 | -2.673484 | -3.146753 | 1.964613  |
| 71 | 1 | 0 | -1.333698 | -2.132395 | 2.547746  |
| 72 | 1 | 0 | -2.484113 | -2.821535 | 3.694095  |
| 73 | 6 | 0 | -4.746438 | -1.571262 | 2.849160  |
| 74 | 1 | 0 | -5.446432 | -0.727501 | 2.830524  |
| 75 | 1 | 0 | -5.086848 | -2.308548 | 2.110705  |
| 76 | 1 | 0 | -4.819927 | -2.033886 | 3.840114  |
| 77 | 6 | 0 | -2.856543 | -0.085722 | 3.614649  |
| 78 | 1 | 0 | -3.454606 | 0.831796  | 3.555150  |
| 79 | 1 | 0 | -2.985181 | -0.489978 | 4.625992  |
| 80 | 1 | 0 | -1.801878 | 0.183142  | 3.500599  |

|    |   |   |           |           |           |
|----|---|---|-----------|-----------|-----------|
| 81 | 8 | 0 | -0.349568 | -1.375486 | -1.586687 |
| 82 | 8 | 0 | -1.692226 | -3.774908 | -0.550715 |
| 83 | 6 | 0 | -1.164054 | -2.094437 | -2.172481 |
| 84 | 6 | 0 | -2.080672 | -3.107387 | -1.471737 |
| 85 | 8 | 0 | -1.315823 | -2.115782 | -3.462905 |
| 86 | 6 | 0 | -0.488468 | -1.229378 | -4.286479 |
| 87 | 1 | 0 | -0.775991 | -1.460333 | -5.309732 |
| 88 | 1 | 0 | -0.718764 | -0.193341 | -4.033122 |
| 89 | 1 | 0 | 0.564381  | -1.453009 | -4.110372 |
| 90 | 6 | 0 | -3.531271 | -3.216321 | -2.008153 |
| 91 | 9 | 0 | -3.997936 | -1.981205 | -2.275599 |
| 92 | 9 | 0 | -4.310785 | -3.784976 | -1.089317 |
| 93 | 9 | 0 | -3.567129 | -3.942931 | -3.131372 |
| 94 | 5 | 0 | 1.646871  | -0.321873 | 3.263792  |
| 95 | 9 | 0 | 2.046222  | -1.637513 | 3.391622  |
| 96 | 9 | 0 | 1.176504  | 0.221137  | 4.432288  |
| 97 | 9 | 0 | 2.584875  | 0.468602  | 2.632855  |
| 98 | 9 | 0 | 0.416050  | -0.349292 | 2.353242  |

---

**M1<sub>exo</sub>-BF<sub>4</sub>**

Total energy= -2753.70795681

Sum of electronic and zero-point Energies= -2752.928149

Sum of electronic and thermal Energies= -2752.874324

Sum of electronic and thermal Enthalpies= -2752.873380

Sum of electronic and thermal Free Energies= -2753.018014

---

| Center<br>Number | Atomic<br>Number | Atomic<br>Type | Coordinates (Angstroms) |           |           |
|------------------|------------------|----------------|-------------------------|-----------|-----------|
|                  |                  |                | X                       | Y         | Z         |
| 1                | 45               | 0              | 0.008818                | -0.872278 | 0.564768  |
| 2                | 6                | 0              | -3.289661               | -0.858020 | 1.062756  |
| 3                | 1                | 0              | -3.439145               | -1.786030 | 0.499481  |
| 4                | 7                | 0              | -3.494605               | 1.267002  | -0.019116 |
| 5                | 6                | 0              | -2.198561               | 0.903832  | 0.054545  |
| 6                | 6                | 0              | -4.046792               | 2.552821  | -0.316033 |
| 7                | 7                | 0              | -1.995866               | -0.268929 | 0.635979  |
| 8                | 6                | 0              | -4.327060               | 0.207122  | 0.593016  |
| 9                | 1                | 0              | -4.902865               | 0.638975  | 1.415080  |
| 10               | 7                | 0              | 2.083488                | -0.820692 | 0.236849  |
| 11               | 6                | 0              | 4.450853                | -0.647907 | 0.419609  |
| 12               | 1                | 0              | 5.193236                | -1.054337 | -0.271943 |
| 13               | 7                | 0              | 3.814842                | 0.542004  | -0.185439 |
| 14               | 6                | 0              | 3.255552                | -1.614790 | 0.684835  |



|    |   |   |           |           |           |
|----|---|---|-----------|-----------|-----------|
| 15 | 1 | 0 | 3.152576  | -1.782215 | 1.760104  |
| 16 | 6 | 0 | 4.552043  | 2.697065  | 0.719527  |
| 17 | 1 | 0 | 4.003441  | 2.481072  | 1.632322  |
| 18 | 6 | 0 | 1.434926  | 1.316155  | -0.612201 |
| 19 | 6 | 0 | 0.374054  | 3.291014  | -1.520436 |
| 20 | 1 | 0 | 0.456329  | 4.244791  | -2.031753 |
| 21 | 6 | 0 | 4.531461  | 1.774275  | -0.334068 |
| 22 | 6 | 0 | -3.748781 | 3.662056  | 0.486137  |
| 23 | 1 | 0 | -3.066316 | 3.556405  | 1.324469  |
| 24 | 6 | 0 | 5.246352  | 2.032763  | -1.505171 |
| 25 | 1 | 0 | 5.230819  | 1.310193  | -2.316248 |
| 26 | 6 | 0 | -4.943246 | 2.684840  | -1.380309 |
| 27 | 1 | 0 | -5.176103 | 1.823525  | -1.999913 |
| 28 | 6 | 0 | 0.160901  | 0.871083  | -0.263330 |
| 29 | 6 | 0 | 1.536835  | 2.558792  | -1.258178 |
| 30 | 1 | 0 | 2.499829  | 2.951917  | -1.562117 |
| 31 | 6 | 0 | -0.890458 | 2.837987  | -1.130429 |
| 32 | 1 | 0 | -1.762750 | 3.444689  | -1.340114 |
| 33 | 6 | 0 | -1.009231 | 1.602526  | -0.470792 |
| 34 | 6 | 0 | 5.966317  | 3.223716  | -1.626238 |
| 35 | 1 | 0 | 6.516419  | 3.423149  | -2.542319 |
| 36 | 6 | 0 | 2.481466  | 0.361387  | -0.204518 |
| 37 | 6 | 0 | -5.527671 | 3.924308  | -1.644968 |
| 38 | 1 | 0 | -6.221463 | 4.017468  | -2.476608 |
| 39 | 6 | 0 | -4.325408 | 4.897718  | 0.198870  |
| 40 | 1 | 0 | -4.079301 | 5.755474  | 0.820158  |
| 41 | 6 | 0 | 5.993772  | 4.164291  | -0.587389 |
| 42 | 6 | 0 | -5.226639 | 5.051176  | -0.866986 |
| 43 | 6 | 0 | 5.273978  | 3.880673  | 0.585489  |
| 44 | 1 | 0 | 5.281235  | 4.595538  | 1.404928  |
| 45 | 6 | 0 | 6.775742  | 5.449071  | -0.715138 |
| 46 | 1 | 0 | 6.134299  | 6.322977  | -0.547423 |
| 47 | 1 | 0 | 7.227571  | 5.545728  | -1.707312 |
| 48 | 1 | 0 | 7.581505  | 5.497722  | 0.028298  |
| 49 | 6 | 0 | -5.863127 | 6.390786  | -1.148895 |
| 50 | 1 | 0 | -6.373147 | 6.396313  | -2.117223 |
| 51 | 1 | 0 | -5.116941 | 7.193888  | -1.150241 |
| 52 | 1 | 0 | -6.605292 | 6.644841  | -0.380618 |
| 53 | 1 | 0 | 4.959869  | -0.358062 | 1.343521  |
| 54 | 1 | 0 | -5.027679 | -0.192487 | -0.145246 |
| 55 | 6 | 0 | -3.370295 | -1.230588 | 2.574156  |
| 56 | 6 | 0 | 3.380492  | -3.013253 | 0.010187  |
| 57 | 6 | 0 | 4.672837  | -3.683338 | 0.522348  |
| 58 | 1 | 0 | 4.740839  | -4.708791 | 0.140440  |

|    |   |   |           |           |           |
|----|---|---|-----------|-----------|-----------|
| 59 | 1 | 0 | 5.575718  | -3.154381 | 0.197114  |
| 60 | 1 | 0 | 4.686362  | -3.733379 | 1.618440  |
| 61 | 6 | 0 | 2.191959  | -3.890981 | 0.444817  |
| 62 | 1 | 0 | 2.157984  | -4.000666 | 1.535624  |
| 63 | 1 | 0 | 1.232099  | -3.477713 | 0.118324  |
| 64 | 1 | 0 | 2.280149  | -4.894953 | 0.011882  |
| 65 | 6 | 0 | 3.417223  | -2.909031 | -1.524323 |
| 66 | 1 | 0 | 2.496491  | -2.466510 | -1.921793 |
| 67 | 1 | 0 | 4.259787  | -2.301711 | -1.876425 |
| 68 | 1 | 0 | 3.528236  | -3.905539 | -1.968748 |
| 69 | 6 | 0 | -2.347801 | -2.341021 | 2.874283  |
| 70 | 1 | 0 | -2.545040 | -3.238795 | 2.278312  |
| 71 | 1 | 0 | -1.324701 | -2.011305 | 2.667101  |
| 72 | 1 | 0 | -2.392815 | -2.621135 | 3.933742  |
| 73 | 6 | 0 | -4.783351 | -1.784181 | 2.851443  |
| 74 | 1 | 0 | -5.561514 | -1.020907 | 2.734308  |
| 75 | 1 | 0 | -5.023973 | -2.619549 | 2.181092  |
| 76 | 1 | 0 | -4.843689 | -2.155760 | 3.880911  |
| 77 | 6 | 0 | -3.094448 | -0.021653 | 3.485208  |
| 78 | 1 | 0 | -3.768676 | 0.818725  | 3.280665  |
| 79 | 1 | 0 | -3.242224 | -0.306844 | 4.533688  |
| 80 | 1 | 0 | -2.063908 | 0.332069  | 3.383111  |
| 81 | 8 | 0 | -1.505337 | -3.759139 | -0.071564 |
| 82 | 8 | 0 | -0.218220 | -1.599477 | -1.339341 |
| 83 | 6 | 0 | -1.611091 | -3.571414 | -1.263025 |
| 84 | 6 | 0 | -0.800723 | -2.476962 | -1.955686 |
| 85 | 8 | 0 | -2.366985 | -4.217080 | -2.127175 |
| 86 | 6 | 0 | -3.182762 | -5.304649 | -1.603049 |
| 87 | 1 | 0 | -3.702508 | -5.708302 | -2.469891 |
| 88 | 1 | 0 | -2.536295 | -6.057104 | -1.147009 |
| 89 | 1 | 0 | -3.890787 | -4.911447 | -0.870636 |
| 90 | 6 | 0 | -0.655218 | -2.463785 | -3.495013 |
| 91 | 9 | 0 | -0.240131 | -3.662077 | -3.922333 |
| 92 | 9 | 0 | 0.231324  | -1.537915 | -3.864998 |
| 93 | 9 | 0 | -1.841429 | -2.180682 | -4.050036 |
| 94 | 5 | 0 | 1.202510  | -0.379585 | 3.488091  |
| 95 | 9 | 0 | 2.434184  | 0.186499  | 3.245114  |
| 96 | 9 | 0 | 1.215865  | -1.761063 | 3.386325  |
| 97 | 9 | 0 | 0.286973  | 0.106220  | 2.356215  |
| 98 | 9 | 0 | 0.602736  | 0.076734  | 4.632589  |

---

**TS2R<sub>endo</sub>-BF<sub>4</sub>**

Imaginary frequency= -142.34

Total energy= -3102.66904613  
Sum of electronic and zero-point Energies= -3101.725698  
Sum of electronic and thermal Energies= -3101.663518  
Sum of electronic and thermal Enthalpies= -3101.662573  
Sum of electronic and thermal Free Energies= -3101.825245

---

| Center<br>Number | Atomic<br>Number | Atomic<br>Type | Coordinates (Angstroms) |           |           |
|------------------|------------------|----------------|-------------------------|-----------|-----------|
|                  |                  |                | X                       | Y         | Z         |
| 1                | 45               | 0              | 0.308047                | -0.327313 | 0.673165  |
| 2                | 6                | 0              | -1.391052               | 2.461624  | 1.397060  |
| 3                | 1                | 0              | -2.328265               | 2.001833  | 1.082428  |
| 4                | 7                | 0              | 0.076961                | 3.762291  | 0.032082  |
| 5                | 6                | 0              | 0.506696                | 2.483631  | 0.089715  |
| 6                | 6                | 0              | 0.753718                | 4.926282  | -0.444536 |
| 7                | 7                | 0              | -0.277310               | 1.683819  | 0.793780  |
| 8                | 6                | 0              | -1.228555               | 3.855602  | 0.721869  |
| 9                | 1                | 0              | -1.199306               | 4.680982  | 1.435425  |
| 10               | 7                | 0              | 1.449087                | -2.043997 | 0.231587  |
| 11               | 6                | 0              | 2.818042                | -3.980464 | 0.047774  |
| 12               | 1                | 0              | 2.586930                | -4.694998 | -0.749317 |
| 13               | 7                | 0              | 3.432316                | -2.767398 | -0.533124 |
| 14               | 6                | 0              | 1.548823                | -3.429399 | 0.757725  |
| 15               | 1                | 0              | 1.743421                | -3.348751 | 1.832420  |
| 16               | 6                | 0              | 5.730713                | -2.068214 | -0.058881 |
| 17               | 1                | 0              | 5.379696                | -1.597845 | 0.854757  |
| 18               | 6                | 0              | 2.746138                | -0.338690 | -0.827796 |
| 19               | 6                | 0              | 3.666710                | 1.612541  | -1.922448 |
| 20               | 1                | 0              | 4.422389                | 2.055853  | -2.563338 |
| 21               | 6                | 0              | 4.814462                | -2.714678 | -0.894739 |
| 22               | 6                | 0              | 0.209995                | 5.647167  | -1.515499 |
| 23               | 1                | 0              | -0.691950               | 5.288099  | -2.002939 |
| 24               | 6                | 0              | 5.258404                | -3.351296 | -2.059557 |
| 25               | 1                | 0              | 4.543724                | -3.856194 | -2.703457 |
| 26               | 6                | 0              | 1.913700                | 5.389020  | 0.185271  |
| 27               | 1                | 0              | 2.326556                | 4.840510  | 1.026901  |
| 28               | 6                | 0              | 1.742551                | 0.490177  | -0.323874 |
| 29               | 6                | 0              | 3.725540                | 0.241725  | -1.649718 |
| 30               | 1                | 0              | 4.520016                | -0.356065 | -2.080867 |
| 31               | 6                | 0              | 2.663619                | 2.429855  | -1.390178 |
| 32               | 1                | 0              | 2.657117                | 3.487178  | -1.625701 |
| 33               | 6                | 0              | 1.677300                | 1.865443  | -0.563984 |
| 34               | 6                | 0              | 6.612575                | -3.324707 | -2.388251 |
| 35               | 1                | 0              | 6.950367                | -3.819489 | -3.295881 |

---

|    |   |   |           |           |           |
|----|---|---|-----------|-----------|-----------|
| 36 | 6 | 0 | 2.571368  | -1.737197 | -0.395816 |
| 37 | 6 | 0 | 2.534407  | 6.552800  | -0.273355 |
| 38 | 1 | 0 | 3.438938  | 6.900860  | 0.219049  |
| 39 | 6 | 0 | 0.831060  | 6.814740  | -1.952857 |
| 40 | 1 | 0 | 0.401532  | 7.365741  | -2.786152 |
| 41 | 6 | 0 | 7.546343  | -2.663072 | -1.573460 |
| 42 | 6 | 0 | 2.004535  | 7.287887  | -1.342575 |
| 43 | 6 | 0 | 7.081883  | -2.038295 | -0.407704 |
| 44 | 1 | 0 | 7.787562  | -1.528200 | 0.243146  |
| 45 | 6 | 0 | 9.007970  | -2.630325 | -1.950240 |
| 46 | 1 | 0 | 9.159492  | -2.119788 | -2.909891 |
| 47 | 1 | 0 | 9.413939  | -3.643612 | -2.060310 |
| 48 | 1 | 0 | 9.602899  | -2.108335 | -1.194353 |
| 49 | 6 | 0 | 2.660611  | 8.560797  | -1.819850 |
| 50 | 1 | 0 | 3.624239  | 8.722693  | -1.326792 |
| 51 | 1 | 0 | 2.027768  | 9.433483  | -1.612317 |
| 52 | 1 | 0 | 2.831683  | 8.540708  | -2.903020 |
| 53 | 1 | 0 | 3.513598  | -4.450501 | 0.746409  |
| 54 | 1 | 0 | -2.020947 | 4.053379  | -0.007445 |
| 55 | 6 | 0 | -1.408335 | 2.493450  | 2.959922  |
| 56 | 6 | 0 | 0.268255  | -4.289450 | 0.591489  |
| 57 | 6 | 0 | 0.569916  | -5.708144 | 1.116272  |
| 58 | 1 | 0 | -0.339323 | -6.320810 | 1.096069  |
| 59 | 1 | 0 | 1.324898  | -6.220538 | 0.508435  |
| 60 | 1 | 0 | 0.930099  | -5.680391 | 2.152296  |
| 61 | 6 | 0 | -0.848283 | -3.678103 | 1.458954  |
| 62 | 1 | 0 | -0.548087 | -3.632211 | 2.513169  |
| 63 | 1 | 0 | -1.107120 | -2.661981 | 1.138837  |
| 64 | 1 | 0 | -1.756470 | -4.290476 | 1.398849  |
| 65 | 6 | 0 | -0.192492 | -4.365946 | -0.873906 |
| 66 | 1 | 0 | -0.399752 | -3.369654 | -1.279453 |
| 67 | 1 | 0 | 0.557784  | -4.838808 | -1.518797 |
| 68 | 1 | 0 | -1.107867 | -4.965264 | -0.950873 |
| 69 | 6 | 0 | -1.634784 | 1.070860  | 3.507624  |
| 70 | 1 | 0 | -2.555858 | 0.634168  | 3.106700  |
| 71 | 1 | 0 | -0.804502 | 0.404606  | 3.259730  |
| 72 | 1 | 0 | -1.718644 | 1.099673  | 4.601301  |
| 73 | 6 | 0 | -2.607921 | 3.361364  | 3.398799  |
| 74 | 1 | 0 | -2.503626 | 4.410822  | 3.100421  |
| 75 | 1 | 0 | -3.548046 | 2.983045  | 2.977015  |
| 76 | 1 | 0 | -2.702201 | 3.342620  | 4.490899  |
| 77 | 6 | 0 | -0.106628 | 3.070163  | 3.543311  |
| 78 | 1 | 0 | 0.088056  | 4.091771  | 3.194156  |
| 79 | 1 | 0 | -0.171672 | 3.109307  | 4.637570  |

|     |   |   |           |           |           |
|-----|---|---|-----------|-----------|-----------|
| 80  | 1 | 0 | 0.757386  | 2.447796  | 3.288349  |
| 81  | 8 | 0 | -0.610001 | -0.592886 | -1.164102 |
| 82  | 8 | 0 | -2.647622 | -0.465038 | 0.673196  |
| 83  | 6 | 0 | -1.792618 | -0.608166 | -1.534193 |
| 84  | 6 | 0 | -2.979038 | -0.515960 | -0.545465 |
| 85  | 8 | 0 | -2.105556 | -0.682965 | -2.800963 |
| 86  | 6 | 0 | -1.028692 | -0.704069 | -3.785978 |
| 87  | 1 | 0 | -1.534998 | -0.766013 | -4.747348 |
| 88  | 1 | 0 | -0.446101 | 0.215599  | -3.708757 |
| 89  | 1 | 0 | -0.396989 | -1.577990 | -3.619592 |
| 90  | 6 | 0 | -3.992151 | 0.577662  | -1.001545 |
| 91  | 9 | 0 | -3.314507 | 1.744717  | -1.180253 |
| 92  | 9 | 0 | -4.909277 | 0.782055  | -0.046278 |
| 93  | 9 | 0 | -4.635630 | 0.322427  | -2.153810 |
| 94  | 6 | 0 | -8.632258 | -1.277691 | -0.156099 |
| 95  | 6 | 0 | -7.347314 | -1.560354 | 0.291123  |
| 96  | 6 | 0 | -6.342228 | -1.982099 | -0.612829 |
| 97  | 6 | 0 | -6.689404 | -2.127070 | -1.978798 |
| 98  | 6 | 0 | -7.982656 | -1.866131 | -2.415346 |
| 99  | 6 | 0 | -8.956158 | -1.435042 | -1.508040 |
| 100 | 1 | 0 | -9.384527 | -0.936510 | 0.548660  |
| 101 | 1 | 0 | -7.113388 | -1.419240 | 1.340045  |
| 102 | 1 | 0 | -5.956414 | -2.487503 | -2.691959 |
| 103 | 1 | 0 | -8.235528 | -2.002426 | -3.462563 |
| 104 | 1 | 0 | -9.965776 | -1.228307 | -1.851754 |
| 105 | 6 | 0 | -4.990776 | -2.267540 | -0.151204 |
| 106 | 6 | 0 | -4.688067 | -2.538971 | 1.275414  |
| 107 | 1 | 0 | -4.031626 | -1.712531 | 1.619600  |
| 108 | 1 | 0 | -5.558228 | -2.627869 | 1.924146  |
| 109 | 1 | 0 | -4.075850 | -3.443348 | 1.367084  |
| 110 | 6 | 0 | -3.866927 | -2.183261 | -1.006666 |
| 111 | 1 | 0 | -3.028219 | -2.820563 | -0.733846 |
| 112 | 1 | 0 | -4.032702 | -2.104989 | -2.075295 |
| 113 | 5 | 0 | 2.354993  | -0.773636 | 3.249432  |
| 114 | 9 | 0 | 1.694069  | -1.919356 | 3.654581  |
| 115 | 9 | 0 | 2.686228  | 0.055521  | 4.293619  |
| 116 | 9 | 0 | 3.422532  | -1.038843 | 2.412265  |
| 117 | 9 | 0 | 1.347797  | 0.025826  | 2.440055  |

---

**TS2S<sub>endo</sub>-BF<sub>4</sub>**

Imaginary frequency= -113.67

Total energy= -3102.66634521

Sum of electronic and zero-point Energies= -3101.722990

Sum of electronic and thermal Energies= -3101.659973  
 Sum of electronic and thermal Enthalpies= -3101.659029  
 Sum of electronic and thermal Free Energies= -3101.824972

---

| Center<br>Number | Atomic<br>Number | Atomic<br>Type | Coordinates (Angstroms) |           |           |
|------------------|------------------|----------------|-------------------------|-----------|-----------|
|                  |                  |                | X                       | Y         | Z         |
| 1                | 45               | 0              | 0.320454                | -0.368316 | 0.727059  |
| 2                | 6                | 0              | -1.524535               | 2.318624  | 1.476576  |
| 3                | 1                | 0              | -2.433452               | 1.780486  | 1.191983  |
| 4                | 7                | 0              | -0.247818               | 3.665519  | -0.029863 |
| 5                | 6                | 0              | 0.292566                | 2.432329  | 0.068810  |
| 6                | 6                | 0              | 0.309712                | 4.848071  | -0.609558 |
| 7                | 7                | 0              | -0.374268               | 1.610143  | 0.862068  |
| 8                | 6                | 0              | -1.484731               | 3.713407  | 0.778094  |
| 9                | 1                | 0              | -1.419422               | 4.545029  | 1.483292  |
| 10               | 7                | 0              | 1.565628                | -2.007353 | 0.276076  |
| 11               | 6                | 0              | 3.167919                | -3.765528 | 0.287095  |
| 12               | 1                | 0              | 3.026117                | -4.568805 | -0.443635 |
| 13               | 7                | 0              | 3.639498                | -2.545029 | -0.398293 |
| 14               | 6                | 0              | 1.836761                | -3.304897 | 0.946592  |
| 15               | 1                | 0              | 2.022184                | -3.086596 | 2.007513  |
| 16               | 6                | 0              | 5.869401                | -1.566537 | -0.119417 |
| 17               | 1                | 0              | 5.506636                | -1.030959 | 0.752394  |
| 18               | 6                | 0              | 2.695890                | -0.238626 | -0.869972 |
| 19               | 6                | 0              | 3.410634                | 1.734886  | -2.070696 |
| 20               | 1                | 0              | 4.098329                | 2.212025  | -2.761789 |
| 21               | 6                | 0              | 4.992129                | -2.390445 | -0.835671 |
| 22               | 6                | 0              | -0.294614               | 5.413645  | -1.739469 |
| 23               | 1                | 0              | -1.156544               | 4.928174  | -2.188932 |
| 24               | 6                | 0              | 5.451440                | -3.100336 | -1.948770 |
| 25               | 1                | 0              | 4.768312                | -3.739244 | -2.501423 |
| 26               | 6                | 0              | 1.415242                | 5.475191  | -0.026540 |
| 27               | 1                | 0              | 1.876144                | 5.047084  | 0.858729  |
| 28               | 6                | 0              | 1.658433                | 0.527960  | -0.339385 |
| 29               | 6                | 0              | 3.588006                | 0.383309  | -1.758191 |
| 30               | 1                | 0              | 4.403318                | -0.170167 | -2.209381 |
| 31               | 6                | 0              | 2.372258                | 2.491056  | -1.515311 |
| 32               | 1                | 0              | 2.272949                | 3.535816  | -1.783467 |
| 33               | 6                | 0              | 1.472362                | 1.883186  | -0.624735 |
| 34               | 6                | 0              | 6.783053                | -2.974981 | -2.348364 |
| 35               | 1                | 0              | 7.131751                | -3.526459 | -3.218038 |
| 36               | 6                | 0              | 2.659089                | -1.622145 | -0.365696 |
| 37               | 6                | 0              | 1.925367                | 6.646278  | -0.590487 |

|    |   |   |           |           |           |
|----|---|---|-----------|-----------|-----------|
| 38 | 1 | 0 | 2.790236  | 7.121398  | -0.134464 |
| 39 | 6 | 0 | 0.216972  | 6.589296  | -2.284699 |
| 40 | 1 | 0 | -0.257409 | 7.018712  | -3.164068 |
| 41 | 6 | 0 | 7.674892  | -2.145452 | -1.653235 |
| 42 | 6 | 0 | 1.337472  | 7.224283  | -1.723736 |
| 43 | 6 | 0 | 7.193133  | -1.442282 | -0.537460 |
| 44 | 1 | 0 | 7.866520  | -0.793704 | 0.017851  |
| 45 | 6 | 0 | 9.120366  | -2.028653 | -2.072515 |
| 46 | 1 | 0 | 9.476622  | -0.994866 | -1.999785 |
| 47 | 1 | 0 | 9.267813  | -2.370725 | -3.102024 |
| 48 | 1 | 0 | 9.767405  | -2.638024 | -1.427110 |
| 49 | 6 | 0 | 1.883626  | 8.495652  | -2.327411 |
| 50 | 1 | 0 | 2.769095  | 8.845298  | -1.787547 |
| 51 | 1 | 0 | 1.135934  | 9.298545  | -2.305978 |
| 52 | 1 | 0 | 2.163820  | 8.348619  | -3.377976 |
| 53 | 1 | 0 | 3.908817  | -4.089192 | 1.020945  |
| 54 | 1 | 0 | -2.348939 | 3.884368  | 0.127806  |
| 55 | 6 | 0 | -1.501730 | 2.381936  | 3.038703  |
| 56 | 6 | 0 | 0.683509  | -4.341491 | 0.889490  |
| 57 | 6 | 0 | 1.183041  | -5.648341 | 1.539101  |
| 58 | 1 | 0 | 0.365778  | -6.377158 | 1.594326  |
| 59 | 1 | 0 | 1.996330  | -6.110688 | 0.967222  |
| 60 | 1 | 0 | 1.544057  | -5.472505 | 2.560277  |
| 61 | 6 | 0 | -0.502149 | -3.813903 | 1.718611  |
| 62 | 1 | 0 | -0.201212 | -3.627362 | 2.757828  |
| 63 | 1 | 0 | -0.912523 | -2.883727 | 1.311910  |
| 64 | 1 | 0 | -1.315529 | -4.549079 | 1.733647  |
| 65 | 6 | 0 | 0.231647  | -4.620986 | -0.554500 |
| 66 | 1 | 0 | -0.127325 | -3.710807 | -1.045806 |
| 67 | 1 | 0 | 1.041056  | -5.037325 | -1.166128 |
| 68 | 1 | 0 | -0.586612 | -5.350126 | -0.557880 |
| 69 | 6 | 0 | -1.594520 | 0.959143  | 3.622187  |
| 70 | 1 | 0 | -2.477516 | 0.429803  | 3.247042  |
| 71 | 1 | 0 | -0.710809 | 0.363550  | 3.381207  |
| 72 | 1 | 0 | -1.669663 | 1.008382  | 4.715682  |
| 73 | 6 | 0 | -2.749301 | 3.165204  | 3.500283  |
| 74 | 1 | 0 | -2.745237 | 4.206322  | 3.157362  |
| 75 | 1 | 0 | -3.673344 | 2.694319  | 3.140653  |
| 76 | 1 | 0 | -2.793130 | 3.184503  | 4.595515  |
| 77 | 6 | 0 | -0.230553 | 3.071293  | 3.565987  |
| 78 | 1 | 0 | -0.148591 | 4.109743  | 3.222278  |
| 79 | 1 | 0 | -0.247284 | 3.095380  | 4.662402  |
| 80 | 1 | 0 | 0.676432  | 2.540684  | 3.260144  |
| 81 | 8 | 0 | -0.647205 | -0.634248 | -1.080581 |

|     |   |   |           |           |           |
|-----|---|---|-----------|-----------|-----------|
| 82  | 8 | 0 | -2.588046 | -1.027132 | 0.833751  |
| 83  | 6 | 0 | -1.793771 | -0.974847 | -1.404651 |
| 84  | 6 | 0 | -2.936043 | -1.187374 | -0.377228 |
| 85  | 8 | 0 | -2.103477 | -1.185727 | -2.657793 |
| 86  | 6 | 0 | -1.067640 | -1.020178 | -3.671511 |
| 87  | 1 | 0 | -1.554328 | -1.281113 | -4.609471 |
| 88  | 1 | 0 | -0.729412 | 0.017577  | -3.681894 |
| 89  | 1 | 0 | -0.235298 | -1.694324 | -3.463208 |
| 90  | 6 | 0 | -3.706519 | -2.514021 | -0.655536 |
| 91  | 9 | 0 | -4.351393 | -2.563942 | -1.836865 |
| 92  | 9 | 0 | -4.610512 | -2.726054 | 0.315183  |
| 93  | 9 | 0 | -2.831763 | -3.548085 | -0.636805 |
| 94  | 6 | 0 | -8.670130 | -1.581673 | -0.349427 |
| 95  | 6 | 0 | -7.498986 | -1.026891 | 0.150316  |
| 96  | 6 | 0 | -6.523134 | -0.486714 | -0.723945 |
| 97  | 6 | 0 | -6.786362 | -0.508561 | -2.116803 |
| 98  | 6 | 0 | -7.970474 | -1.043088 | -2.607823 |
| 99  | 6 | 0 | -8.912524 | -1.586795 | -1.727630 |
| 100 | 1 | 0 | -9.397495 | -2.009633 | 0.333642  |
| 101 | 1 | 0 | -7.320893 | -1.047381 | 1.219120  |
| 102 | 1 | 0 | -6.079984 | -0.065760 | -2.809666 |
| 103 | 1 | 0 | -8.164620 | -1.033572 | -3.676045 |
| 104 | 1 | 0 | -9.835699 | -2.008810 | -2.114461 |
| 105 | 6 | 0 | -5.290453 | 0.081455  | -0.207811 |
| 106 | 6 | 0 | -5.150646 | 0.511482  | 1.204762  |
| 107 | 1 | 0 | -4.802665 | 1.550771  | 1.239713  |
| 108 | 1 | 0 | -6.051664 | 0.418751  | 1.808915  |
| 109 | 1 | 0 | -4.323708 | -0.084057 | 1.640047  |
| 110 | 6 | 0 | -4.105015 | 0.164102  | -0.990450 |
| 111 | 1 | 0 | -3.452914 | 0.998633  | -0.735775 |
| 112 | 1 | 0 | -4.191342 | -0.011086 | -2.057558 |
| 113 | 5 | 0 | 2.742941  | 0.236780  | 2.924743  |
| 114 | 9 | 0 | 2.880414  | 1.536803  | 2.481577  |
| 115 | 9 | 0 | 2.754363  | 0.121949  | 4.293274  |
| 116 | 9 | 0 | 3.618623  | -0.634032 | 2.302070  |
| 117 | 9 | 0 | 1.339799  | -0.206500 | 2.527335  |

---

**TS2R<sub>exo</sub>-BF<sub>4</sub>**

Imaginary frequency= -86.75

Total energy= -3102.67292268

Sum of electronic and zero-point Energies= -3101.729367

Sum of electronic and thermal Energies= -3101.665925

Sum of electronic and thermal Enthalpies= -3101.664981



Sum of electronic and thermal Free Energies= -3101.830824

---

| Center<br>Number | Atomic<br>Number | Atomic<br>Type | Coordinates (Angstroms) |           |           |
|------------------|------------------|----------------|-------------------------|-----------|-----------|
|                  |                  |                | X                       | Y         | Z         |
| 1                | 45               | 0              | 0.475944                | -0.321304 | 1.044762  |
| 2                | 6                | 0              | -2.025065               | 1.487848  | 2.359875  |
| 3                | 1                | 0              | -2.685806               | 0.615793  | 2.398108  |
| 4                | 7                | 0              | -1.898969               | 3.045013  | 0.545802  |
| 5                | 6                | 0              | -0.910959               | 2.129573  | 0.445182  |
| 6                | 6                | 0              | -2.019841               | 4.316958  | -0.095664 |
| 7                | 7                | 0              | -0.937385               | 1.197575  | 1.385839  |
| 8                | 6                | 0              | -2.767376               | 2.683466  | 1.688037  |
| 9                | 1                | 0              | -2.870068               | 3.548353  | 2.345192  |
| 10               | 7                | 0              | 2.150805                | -1.353868 | 0.236813  |
| 11               | 6                | 0              | 4.393161                | -2.100344 | -0.099286 |
| 12               | 1                | 0              | 4.750560                | -2.961537 | -0.668307 |
| 13               | 7                | 0              | 3.982562                | -1.028819 | -1.029141 |
| 14               | 6                | 0              | 3.102760                | -2.394066 | 0.722932  |
| 15               | 1                | 0              | 3.289052                | -2.198661 | 1.781100  |
| 16               | 6                | 0              | 5.633269                | 0.778362  | -1.156053 |
| 17               | 1                | 0              | 5.382550                | 1.057854  | -0.136401 |
| 18               | 6                | 0              | 2.007560                | 0.544507  | -1.215685 |
| 19               | 6                | 0              | 1.466513                | 2.483657  | -2.555906 |
| 20               | 1                | 0              | 1.674365                | 3.115161  | -3.413916 |
| 21               | 6                | 0              | 4.966620                | -0.289445 | -1.764832 |
| 22               | 6                | 0              | -1.039881               | 5.304306  | 0.075480  |
| 23               | 1                | 0              | -0.155403               | 5.092626  | 0.668925  |
| 24               | 6                | 0              | 5.299230                | -0.670153 | -3.068911 |
| 25               | 1                | 0              | 4.782834                | -1.505716 | -3.532861 |
| 26               | 6                | 0              | -3.167589               | 4.602814  | -0.840838 |
| 27               | 1                | 0              | -3.931401               | 3.841292  | -0.969433 |
| 28               | 6                | 0              | 0.912722                | 0.863979  | -0.413489 |
| 29               | 6                | 0              | 2.282997                | 1.373956  | -2.314639 |
| 30               | 1                | 0              | 3.112848                | 1.162898  | -2.978853 |
| 31               | 6                | 0              | 0.402364                | 2.814435  | -1.710480 |
| 32               | 1                | 0              | -0.188947               | 3.697244  | -1.920528 |
| 33               | 6                | 0              | 0.121640                | 2.000259  | -0.600131 |
| 34               | 6                | 0              | 6.284095                | 0.031376  | -3.763487 |
| 35               | 1                | 0              | 6.534482                | -0.265588 | -4.779241 |
| 36               | 6                | 0              | 2.733892                | -0.632056 | -0.706372 |
| 37               | 6                | 0              | -3.325820               | 5.863909  | -1.418064 |
| 38               | 1                | 0              | -4.222467               | 6.075261  | -1.995075 |
| 39               | 6                | 0              | -1.204077               | 6.553755  | -0.518810 |

---

|    |   |   |           |           |           |
|----|---|---|-----------|-----------|-----------|
| 40 | 1 | 0 | -0.434114 | 7.309678  | -0.383680 |
| 41 | 6 | 0 | 6.958183  | 1.113361  | -3.174004 |
| 42 | 6 | 0 | -2.350318 | 6.859433  | -1.270441 |
| 43 | 6 | 0 | 6.616324  | 1.472502  | -1.862593 |
| 44 | 1 | 0 | 7.126659  | 2.305189  | -1.385177 |
| 45 | 6 | 0 | 8.029115  | 1.858235  | -3.933996 |
| 46 | 1 | 0 | 8.377297  | 2.734059  | -3.377562 |
| 47 | 1 | 0 | 7.661929  | 2.199266  | -4.909609 |
| 48 | 1 | 0 | 8.897972  | 1.215641  | -4.126449 |
| 49 | 6 | 0 | -2.521712 | 8.225112  | -1.890233 |
| 50 | 1 | 0 | -3.460684 | 8.296504  | -2.448083 |
| 51 | 1 | 0 | -1.700003 | 8.455894  | -2.579675 |
| 52 | 1 | 0 | -2.524075 | 9.010223  | -1.123568 |
| 53 | 1 | 0 | 5.210179  | -1.737964 | 0.532551  |
| 54 | 1 | 0 | -3.762668 | 2.406293  | 1.326639  |
| 55 | 6 | 0 | -1.565110 | 1.767287  | 3.829425  |
| 56 | 6 | 0 | 2.596116  | -3.863539 | 0.612162  |
| 57 | 6 | 0 | 3.721033  | -4.799959 | 1.102943  |
| 58 | 1 | 0 | 3.355493  | -5.833069 | 1.140641  |
| 59 | 1 | 0 | 4.596678  | -4.789651 | 0.444213  |
| 60 | 1 | 0 | 4.054052  | -4.527003 | 2.112345  |
| 61 | 6 | 0 | 1.390133  | -4.050116 | 1.548235  |
| 62 | 1 | 0 | 1.662529  | -3.840461 | 2.590136  |
| 63 | 1 | 0 | 0.568518  | -3.385046 | 1.280166  |
| 64 | 1 | 0 | 1.019399  | -5.081127 | 1.498163  |
| 65 | 6 | 0 | 2.207182  | -4.229556 | -0.830320 |
| 66 | 1 | 0 | 1.381651  | -3.610309 | -1.193951 |
| 67 | 1 | 0 | 3.049726  | -4.114384 | -1.523171 |
| 68 | 1 | 0 | 1.884747  | -5.276433 | -0.881102 |
| 69 | 6 | 0 | -0.949666 | 0.499907  | 4.449303  |
| 70 | 1 | 0 | -1.652943 | -0.339477 | 4.425206  |
| 71 | 1 | 0 | -0.035558 | 0.188453  | 3.941705  |
| 72 | 1 | 0 | -0.690786 | 0.691002  | 5.498091  |
| 73 | 6 | 0 | -2.821839 | 2.124065  | 4.654411  |
| 74 | 1 | 0 | -3.280474 | 3.068596  | 4.342133  |
| 75 | 1 | 0 | -3.584189 | 1.337080  | 4.583686  |
| 76 | 1 | 0 | -2.552428 | 2.229175  | 5.711634  |
| 77 | 6 | 0 | -0.548065 | 2.919357  | 3.905489  |
| 78 | 1 | 0 | -0.931850 | 3.843737  | 3.457026  |
| 79 | 1 | 0 | -0.315191 | 3.140414  | 4.954105  |
| 80 | 1 | 0 | 0.391222  | 2.657008  | 3.409081  |
| 81 | 8 | 0 | -1.328155 | -1.971008 | 2.380311  |
| 82 | 8 | 0 | -0.744143 | -1.385005 | -0.233392 |
| 83 | 6 | 0 | -2.006289 | -2.465718 | 1.498100  |

|     |   |   |           |           |           |
|-----|---|---|-----------|-----------|-----------|
| 84  | 6 | 0 | -1.720286 | -2.134647 | 0.028170  |
| 85  | 8 | 0 | -2.983717 | -3.335000 | 1.665054  |
| 86  | 6 | 0 | -3.256670 | -3.756012 | 3.031245  |
| 87  | 1 | 0 | -4.056884 | -4.489317 | 2.945065  |
| 88  | 1 | 0 | -2.361369 | -4.206310 | 3.463912  |
| 89  | 1 | 0 | -3.578016 | -2.897564 | 3.624751  |
| 90  | 6 | 0 | -1.968008 | -3.238350 | -1.026234 |
| 91  | 9 | 0 | -1.101513 | -4.243861 | -0.763837 |
| 92  | 9 | 0 | -1.707832 | -2.779377 | -2.257535 |
| 93  | 9 | 0 | -3.199201 | -3.753860 | -1.008042 |
| 94  | 6 | 0 | -5.404532 | -2.372239 | -4.613805 |
| 95  | 6 | 0 | -4.543918 | -1.621057 | -3.819218 |
| 96  | 6 | 0 | -4.731761 | -1.542353 | -2.421207 |
| 97  | 6 | 0 | -5.829471 | -2.230232 | -1.855996 |
| 98  | 6 | 0 | -6.695076 | -2.969439 | -2.654893 |
| 99  | 6 | 0 | -6.483716 | -3.047556 | -4.035530 |
| 100 | 1 | 0 | -5.234900 | -2.430291 | -5.685035 |
| 101 | 1 | 0 | -3.708837 | -1.109044 | -4.284347 |
| 102 | 1 | 0 | -6.025498 | -2.157834 | -0.791440 |
| 103 | 1 | 0 | -7.540655 | -3.479866 | -2.203097 |
| 104 | 1 | 0 | -7.160847 | -3.625816 | -4.657937 |
| 105 | 6 | 0 | -3.818661 | -0.746203 | -1.591981 |
| 106 | 6 | 0 | -2.970634 | 0.298557  | -2.259993 |
| 107 | 1 | 0 | -2.171352 | -0.173586 | -2.847265 |
| 108 | 1 | 0 | -3.561523 | 0.905397  | -2.954420 |
| 109 | 1 | 0 | -2.504976 | 0.957241  | -1.527293 |
| 110 | 6 | 0 | -3.690388 | -0.944669 | -0.229570 |
| 111 | 1 | 0 | -3.220348 | -0.169023 | 0.364852  |
| 112 | 1 | 0 | -4.341045 | -1.633715 | 0.296709  |
| 113 | 5 | 0 | 2.764470  | 0.248343  | 3.218947  |
| 114 | 9 | 0 | 3.972882  | 0.087709  | 2.572755  |
| 115 | 9 | 0 | 2.219215  | -0.957945 | 3.639252  |
| 116 | 9 | 0 | 1.804662  | 0.803201  | 2.176025  |
| 117 | 9 | 0 | 2.798528  | 1.196090  | 4.211536  |

---

**TS2S<sub>exo</sub>-BF<sub>4</sub>**

Imaginary frequency= -62.78

Total energy= -3102.67398015

Sum of electronic and zero-point Energies= -3101.730538

Sum of electronic and thermal Energies= -3101.667121

Sum of electronic and thermal Enthalpies= -3101.666177

Sum of electronic and thermal Free Energies= -3101.833361

---

| Center<br>Number | Atomic<br>Number | Atomic<br>Type | Coordinates (Angstroms) |           |           |
|------------------|------------------|----------------|-------------------------|-----------|-----------|
|                  |                  |                | X                       | Y         | Z         |
| 1                | 45               | 0              | 0.573766                | -0.188803 | -1.233501 |
| 2                | 6                | 0              | -2.026139               | -2.080505 | -2.121244 |
| 3                | 1                | 0              | -2.646506               | -1.182340 | -2.235251 |
| 4                | 7                | 0              | -2.020624               | -3.150425 | 0.012595  |
| 5                | 6                | 0              | -0.950012               | -2.344836 | -0.105007 |
| 6                | 6                | 0              | -2.476817               | -3.872109 | 1.160589  |
| 7                | 7                | 0              | -0.860261               | -1.726452 | -1.272922 |
| 8                | 6                | 0              | -2.791940               | -3.120598 | -1.245461 |
| 9                | 1                | 0              | -2.804998               | -4.121135 | -1.686595 |
| 10               | 7                | 0              | 2.226045                | 0.999521  | -0.610346 |
| 11               | 6                | 0              | 4.481483                | 1.771941  | -0.383128 |
| 12               | 1                | 0              | 4.753715                | 2.749419  | 0.024752  |
| 13               | 7                | 0              | 4.043988                | 0.883058  | 0.709438  |
| 14               | 6                | 0              | 3.244324                | 1.821814  | -1.329664 |
| 15               | 1                | 0              | 3.480694                | 1.298466  | -2.259742 |
| 16               | 6                | 0              | 5.663530                | -0.762394 | 1.533579  |
| 17               | 1                | 0              | 5.497804                | -1.353204 | 0.637101  |
| 18               | 6                | 0              | 2.023423                | -0.553432 | 1.208004  |
| 19               | 6                | 0              | 1.427639                | -2.171009 | 2.907512  |
| 20               | 1                | 0              | 1.621380                | -2.626760 | 3.873380  |
| 21               | 6                | 0              | 4.954685                | 0.430554  | 1.717553  |
| 22               | 6                | 0              | -2.300378               | -5.258898 | 1.229737  |
| 23               | 1                | 0              | -1.783278               | -5.776268 | 0.426660  |
| 24               | 6                | 0              | 5.169241                | 1.201387  | 2.863281  |
| 25               | 1                | 0              | 4.618990                | 2.128147  | 3.000085  |
| 26               | 6                | 0              | -3.144095               | -3.198618 | 2.187741  |
| 27               | 1                | 0              | -3.292160               | -2.124612 | 2.117219  |
| 28               | 6                | 0              | 0.932231                | -1.014563 | 0.472663  |
| 29               | 6                | 0              | 2.265246                | -1.144179 | 2.459878  |
| 30               | 1                | 0              | 3.090198                | -0.817473 | 3.081763  |
| 31               | 6                | 0              | 0.354002                | -2.636736 | 2.140431  |
| 32               | 1                | 0              | -0.258849               | -3.447565 | 2.515373  |
| 33               | 6                | 0              | 0.092079                | -2.046954 | 0.893560  |
| 34               | 6                | 0              | 6.080404                | 0.767799  | 3.827854  |
| 35               | 1                | 0              | 6.237454                | 1.367809  | 4.720636  |
| 36               | 6                | 0              | 2.783732                | 0.474979  | 0.473481  |
| 37               | 6                | 0              | -3.614054               | -3.914331 | 3.290760  |
| 38               | 1                | 0              | -4.127202               | -3.385355 | 4.089786  |
| 39               | 6                | 0              | -2.781813               | -5.961557 | 2.332172  |
| 40               | 1                | 0              | -2.637883               | -7.038212 | 2.381462  |
| 41               | 6                | 0              | 6.793554                | -0.429182 | 3.667070  |

|    |   |   |           |           |           |
|----|---|---|-----------|-----------|-----------|
| 42 | 6 | 0 | -3.443763 | -5.302940 | 3.381808  |
| 43 | 6 | 0 | 6.567905  | -1.185788 | 2.506045  |
| 44 | 1 | 0 | 7.107854  | -2.118213 | 2.360420  |
| 45 | 6 | 0 | 7.794956  | -0.882728 | 4.701500  |
| 46 | 1 | 0 | 7.754287  | -1.967621 | 4.849888  |
| 47 | 1 | 0 | 7.620854  | -0.397039 | 5.667144  |
| 48 | 1 | 0 | 8.819809  | -0.638457 | 4.390971  |
| 49 | 6 | 0 | -3.958796 | -6.080494 | 4.568946  |
| 50 | 1 | 0 | -4.444862 | -5.423833 | 5.297128  |
| 51 | 1 | 0 | -3.145113 | -6.609669 | 5.080623  |
| 52 | 1 | 0 | -4.687888 | -6.839706 | 4.259113  |
| 53 | 1 | 0 | 5.362598  | 1.345629  | -0.871088 |
| 54 | 1 | 0 | -3.822605 | -2.819612 | -1.039830 |
| 55 | 6 | 0 | -1.680772 | -2.578607 | -3.557987 |
| 56 | 6 | 0 | 2.799790  | 3.260757  | -1.721453 |
| 57 | 6 | 0 | 3.983034  | 3.941185  | -2.441148 |
| 58 | 1 | 0 | 3.681687  | 4.930464  | -2.805797 |
| 59 | 1 | 0 | 4.845879  | 4.085391  | -1.780619 |
| 60 | 1 | 0 | 4.312966  | 3.352734  | -3.306548 |
| 61 | 6 | 0 | 1.620007  | 3.176374  | -2.704108 |
| 62 | 1 | 0 | 1.887941  | 2.600159  | -3.598056 |
| 63 | 1 | 0 | 0.747321  | 2.700096  | -2.249373 |
| 64 | 1 | 0 | 1.320967  | 4.180528  | -3.030109 |
| 65 | 6 | 0 | 2.386517  | 4.092453  | -0.496920 |
| 66 | 1 | 0 | 1.547021  | 3.626959  | 0.029257  |
| 67 | 1 | 0 | 3.206056  | 4.217767  | 0.220659  |
| 68 | 1 | 0 | 2.071364  | 5.095644  | -0.808555 |
| 69 | 6 | 0 | -1.061141 | -1.429485 | -4.374596 |
| 70 | 1 | 0 | -1.716060 | -0.550152 | -4.389556 |
| 71 | 1 | 0 | -0.085658 | -1.122233 | -3.988957 |
| 72 | 1 | 0 | -0.908289 | -1.747902 | -5.413173 |
| 73 | 6 | 0 | -3.001545 | -2.987360 | -4.244469 |
| 74 | 1 | 0 | -3.474469 | -3.853166 | -3.766721 |
| 75 | 1 | 0 | -3.725791 | -2.162125 | -4.240119 |
| 76 | 1 | 0 | -2.810606 | -3.256296 | -5.289733 |
| 77 | 6 | 0 | -0.708137 | -3.770796 | -3.537131 |
| 78 | 1 | 0 | -1.099546 | -4.617728 | -2.960541 |
| 79 | 1 | 0 | -0.534803 | -4.127075 | -4.559624 |
| 80 | 1 | 0 | 0.262144  | -3.487967 | -3.117225 |
| 81 | 8 | 0 | -1.419686 | 1.752778  | -2.822372 |
| 82 | 8 | 0 | -0.875387 | 0.885081  | -0.210888 |
| 83 | 6 | 0 | -2.282068 | 1.767507  | -1.968689 |
| 84 | 6 | 0 | -1.965050 | 1.424700  | -0.507555 |
| 85 | 8 | 0 | -3.562344 | 2.051257  | -2.153302 |

|     |   |   |           |           |           |
|-----|---|---|-----------|-----------|-----------|
| 86  | 6 | 0 | -3.961091 | 2.398224  | -3.507048 |
| 87  | 1 | 0 | -5.030589 | 2.593604  | -3.445852 |
| 88  | 1 | 0 | -3.421511 | 3.289905  | -3.833439 |
| 89  | 1 | 0 | -3.757187 | 1.563810  | -4.180815 |
| 90  | 6 | 0 | -3.130643 | 1.047423  | 0.438111  |
| 91  | 9 | 0 | -4.151769 | 1.903624  | 0.452482  |
| 92  | 9 | 0 | -2.687756 | 0.882531  | 1.693218  |
| 93  | 9 | 0 | -3.602188 | -0.153984 | 0.013601  |
| 94  | 6 | 0 | -4.425402 | 4.393742  | 4.074421  |
| 95  | 6 | 0 | -3.276237 | 3.954040  | 3.423378  |
| 96  | 6 | 0 | -3.064423 | 4.231966  | 2.054403  |
| 97  | 6 | 0 | -4.045297 | 4.989687  | 1.373274  |
| 98  | 6 | 0 | -5.189126 | 5.432595  | 2.028179  |
| 99  | 6 | 0 | -5.387049 | 5.132971  | 3.380197  |
| 100 | 1 | 0 | -4.570891 | 4.158961  | 5.124880  |
| 101 | 1 | 0 | -2.547690 | 3.377626  | 3.981728  |
| 102 | 1 | 0 | -3.901406 | 5.260256  | 0.332916  |
| 103 | 1 | 0 | -5.924955 | 6.020243  | 1.486935  |
| 104 | 1 | 0 | -6.281070 | 5.480419  | 3.890326  |
| 105 | 6 | 0 | -1.847099 | 3.765042  | 1.373854  |
| 106 | 6 | 0 | -0.675370 | 3.326960  | 2.208159  |
| 107 | 1 | 0 | -0.319857 | 4.154365  | 2.835136  |
| 108 | 1 | 0 | -0.950407 | 2.510605  | 2.885159  |
| 109 | 1 | 0 | 0.151482  | 2.986057  | 1.584149  |
| 110 | 6 | 0 | -1.743355 | 3.703504  | -0.001697 |
| 111 | 1 | 0 | -0.759039 | 3.610898  | -0.448597 |
| 112 | 1 | 0 | -2.529351 | 4.087675  | -0.642170 |
| 113 | 5 | 0 | 2.741343  | -1.247659 | -3.325064 |
| 114 | 9 | 0 | 2.168850  | -0.119400 | -3.897761 |
| 115 | 9 | 0 | 2.589662  | -2.374616 | -4.094105 |
| 116 | 9 | 0 | 1.944501  | -1.514378 | -2.055968 |
| 117 | 9 | 0 | 4.037827  | -1.030155 | -2.914530 |

---

**M1<sub>endo</sub>-OTf**

Total energy= -3290.69019920

Sum of electronic and zero-point Energies= -3289.897785

Sum of electronic and thermal Energies= -3289.840193

Sum of electronic and thermal Enthalpies= -3289.839249

Sum of electronic and thermal Free Energies= -3289.993616

---

| Center | Atomic | Atomic | Coordinates (Angstroms) |   |   |
|--------|--------|--------|-------------------------|---|---|
| Number | Number | Type   | X                       | Y | Z |

---

|    |    |   |           |           |           |
|----|----|---|-----------|-----------|-----------|
| 1  | 45 | 0 | 0.037227  | 0.891472  | 0.562376  |
| 2  | 6  | 0 | 3.384792  | 0.719893  | 0.669391  |
| 3  | 1  | 0 | 3.484740  | 1.678152  | 0.145110  |
| 4  | 7  | 0 | 3.357388  | -1.296366 | -0.614182 |
| 5  | 6  | 0 | 2.097279  | -0.913156 | -0.315277 |
| 6  | 6  | 0 | 3.809077  | -2.557469 | -1.119546 |
| 7  | 7  | 0 | 2.020307  | 0.197596  | 0.399342  |
| 8  | 6  | 0 | 4.307180  | -0.338106 | -0.010935 |
| 9  | 1  | 0 | 4.945915  | -0.867975 | 0.701005  |
| 10 | 7  | 0 | -2.033562 | 1.020561  | 0.331292  |
| 11 | 6  | 0 | -4.401514 | 1.157500  | 0.364183  |
| 12 | 1  | 0 | -4.873003 | 1.782643  | -0.402601 |
| 13 | 7  | 0 | -3.891808 | -0.081644 | -0.259866 |
| 14 | 6  | 0 | -3.120272 | 1.799928  | 0.967053  |
| 15 | 1  | 0 | -3.088943 | 1.581334  | 2.042103  |
| 16 | 6  | 0 | -5.272285 | -2.101309 | -0.223014 |
| 17 | 1  | 0 | -4.974815 | -2.262444 | 0.809050  |
| 18 | 6  | 0 | -1.591872 | -1.047258 | -0.773810 |
| 19 | 6  | 0 | -0.715188 | -3.001308 | -1.899923 |
| 20 | 1  | 0 | -0.888678 | -3.897886 | -2.486734 |
| 21 | 6  | 0 | -4.764275 | -1.003961 | -0.922583 |
| 22 | 6  | 0 | 4.382261  | -2.621825 | -2.394997 |
| 23 | 1  | 0 | 4.435811  | -1.724652 | -3.005404 |
| 24 | 6  | 0 | -5.148469 | -0.783016 | -2.251188 |
| 25 | 1  | 0 | -4.756669 | 0.076063  | -2.789019 |
| 26 | 6  | 0 | 3.739469  | -3.709005 | -0.329051 |
| 27 | 1  | 0 | 3.307446  | -3.657085 | 0.666226  |
| 28 | 6  | 0 | -0.277615 | -0.745863 | -0.407456 |
| 29 | 6  | 0 | -1.808394 | -2.209179 | -1.531235 |
| 30 | 1  | 0 | -2.806182 | -2.498618 | -1.837977 |
| 31 | 6  | 0 | 0.595002  | -2.668848 | -1.540097 |
| 32 | 1  | 0 | 1.412168  | -3.305071 | -1.858280 |
| 33 | 6  | 0 | 0.829175  | -1.514771 | -0.772955 |
| 34 | 6  | 0 | -6.023379 | -1.670319 | -2.874859 |
| 35 | 1  | 0 | -6.312710 | -1.496036 | -3.908513 |
| 36 | 6  | 0 | -2.545610 | -0.043230 | -0.266079 |
| 37 | 6  | 0 | 4.223608  | -4.920436 | -0.825976 |
| 38 | 1  | 0 | 4.158388  | -5.812258 | -0.207866 |
| 39 | 6  | 0 | 4.870348  | -3.835396 | -2.875437 |
| 40 | 1  | 0 | 5.309463  | -3.876691 | -3.869381 |
| 41 | 6  | 0 | -6.536572 | -2.785432 | -2.191642 |
| 42 | 6  | 0 | 4.801448  | -5.004907 | -2.100608 |
| 43 | 6  | 0 | -6.147380 | -2.983704 | -0.859711 |
| 44 | 1  | 0 | -6.533855 | -3.838926 | -0.311233 |

|    |   |   |           |           |           |
|----|---|---|-----------|-----------|-----------|
| 45 | 6 | 0 | -7.484745 | -3.737480 | -2.879557 |
| 46 | 1 | 0 | -7.041125 | -4.149596 | -3.794464 |
| 47 | 1 | 0 | -8.411682 | -3.229905 | -3.175230 |
| 48 | 1 | 0 | -7.752718 | -4.574528 | -2.227572 |
| 49 | 6 | 0 | 5.352013  | -6.308812 | -2.625784 |
| 50 | 1 | 0 | 5.055096  | -7.152563 | -1.994909 |
| 51 | 1 | 0 | 6.449405  | -6.287785 | -2.658264 |
| 52 | 1 | 0 | 5.005340  | -6.506210 | -3.646943 |
| 53 | 1 | 0 | -5.147818 | 0.915916  | 1.123861  |
| 54 | 1 | 0 | 4.945265  | 0.097176  | -0.784938 |
| 55 | 6 | 0 | 3.719681  | 0.993585  | 2.168878  |
| 56 | 6 | 0 | -3.004886 | 3.340141  | 0.810190  |
| 57 | 6 | 0 | -4.239217 | 3.982721  | 1.475162  |
| 58 | 1 | 0 | -4.150685 | 5.075470  | 1.462149  |
| 59 | 1 | 0 | -5.168347 | 3.722515  | 0.953872  |
| 60 | 1 | 0 | -4.337646 | 3.667791  | 2.521517  |
| 61 | 6 | 0 | -1.740924 | 3.816399  | 1.550236  |
| 62 | 1 | 0 | -1.769306 | 3.534066  | 2.610290  |
| 63 | 1 | 0 | -0.831811 | 3.388161  | 1.109161  |
| 64 | 1 | 0 | -1.649439 | 4.908097  | 1.497133  |
| 65 | 6 | 0 | -2.927028 | 3.771171  | -0.664739 |
| 66 | 1 | 0 | -2.049610 | 3.341589  | -1.160594 |
| 67 | 1 | 0 | -3.814532 | 3.470473  | -1.233676 |
| 68 | 1 | 0 | -2.851931 | 4.863109  | -0.733543 |
| 69 | 6 | 0 | 2.802570  | 2.101892  | 2.719877  |
| 70 | 1 | 0 | 2.895043  | 3.024664  | 2.136118  |
| 71 | 1 | 0 | 1.751770  | 1.796822  | 2.724137  |
| 72 | 1 | 0 | 3.077846  | 2.334548  | 3.755922  |
| 73 | 6 | 0 | 5.174985  | 1.503268  | 2.235379  |
| 74 | 1 | 0 | 5.898186  | 0.747247  | 1.908418  |
| 75 | 1 | 0 | 5.313370  | 2.396569  | 1.612571  |
| 76 | 1 | 0 | 5.429899  | 1.774132  | 3.266505  |
| 77 | 6 | 0 | 3.567273  | -0.269619 | 3.033415  |
| 78 | 1 | 0 | 4.227488  | -1.081968 | 2.705890  |
| 79 | 1 | 0 | 3.828607  | -0.041940 | 4.073927  |
| 80 | 1 | 0 | 2.537812  | -0.637925 | 3.021760  |
| 81 | 8 | 0 | 0.187984  | 1.756319  | -1.361753 |
| 82 | 8 | 0 | 1.550537  | 3.758614  | 0.042958  |
| 83 | 6 | 0 | 0.770115  | 2.682479  | -1.925129 |
| 84 | 6 | 0 | 1.565020  | 3.746276  | -1.159183 |
| 85 | 8 | 0 | 0.759831  | 2.877625  | -3.212469 |
| 86 | 6 | 0 | 0.037192  | 1.928770  | -4.057976 |
| 87 | 1 | 0 | 0.179364  | 2.299635  | -5.070767 |
| 88 | 1 | 0 | 0.472641  | 0.935526  | -3.935019 |



|     |    |   |           |           |           |
|-----|----|---|-----------|-----------|-----------|
| 89  | 1  | 0 | -1.018339 | 1.930472  | -3.782103 |
| 90  | 6  | 0 | 2.369461  | 4.793947  | -1.969531 |
| 91  | 9  | 0 | 3.220320  | 4.174518  | -2.802398 |
| 92  | 9  | 0 | 3.063343  | 5.571495  | -1.139185 |
| 93  | 9  | 0 | 1.533294  | 5.558131  | -2.688083 |
| 94  | 8  | 0 | -2.361880 | -0.961389 | 2.577791  |
| 95  | 8  | 0 | -0.013081 | -0.017025 | 2.414176  |
| 96  | 8  | 0 | -1.079509 | -0.242324 | 4.625811  |
| 97  | 16 | 0 | -1.076034 | -0.749797 | 3.250572  |
| 98  | 6  | 0 | -0.305319 | -2.442378 | 3.353098  |
| 99  | 9  | 0 | 0.887045  | -2.383555 | 3.954946  |
| 100 | 9  | 0 | -1.107325 | -3.248483 | 4.055327  |
| 101 | 9  | 0 | -0.143927 | -2.954806 | 2.125230  |

---

### **M1<sub>exo</sub>-OTf**

Total energy= -3290.68891480

Sum of electronic and zero-point Energies= -3289.895170

Sum of electronic and thermal Energies= -3289.838037

Sum of electronic and thermal Enthalpies= -3289.837093

Sum of electronic and thermal Free Energies= -3289.990194

---

| Center<br>Number | Atomic<br>Number | Atomic<br>Type | Coordinates (Angstroms) |           |           |
|------------------|------------------|----------------|-------------------------|-----------|-----------|
|                  |                  |                | X                       | Y         | Z         |
| 1                | 45               | 0              | -0.004922               | -0.971242 | 0.575110  |
| 2                | 6                | 0              | -3.346949               | -1.097112 | 0.608118  |
| 3                | 1                | 0              | -3.348426               | -2.029734 | 0.028936  |
| 4                | 7                | 0              | -3.481890               | 0.956915  | -0.607648 |
| 5                | 6                | 0              | -2.197033               | 0.677660  | -0.299783 |
| 6                | 6                | 0              | -4.029144               | 2.197360  | -1.067968 |
| 7                | 7                | 0              | -2.034539               | -0.439582 | 0.389555  |
| 8                | 6                | 0              | -4.352583               | -0.091982 | -0.032412 |
| 9                | 1                | 0              | -5.023773               | 0.363638  | 0.700928  |
| 10               | 7                | 0              | 2.071537                | -0.924428 | 0.366687  |
| 11               | 6                | 0              | 4.435463                | -0.890626 | 0.396858  |
| 12               | 1                | 0              | 4.908023                | -1.485430 | -0.393787 |
| 13               | 7                | 0              | 3.839572                | 0.326771  | -0.196647 |
| 14               | 6                | 0              | 3.209131                | -1.595508 | 1.036354  |
| 15               | 1                | 0              | 3.164032                | -1.319084 | 2.098433  |
| 16               | 6                | 0              | 5.109007                | 2.410500  | -0.070389 |
| 17               | 1                | 0              | 4.829919                | 2.492384  | 0.976025  |
| 18               | 6                | 0              | 1.474283                | 1.118432  | -0.713136 |
| 19               | 6                | 0              | 0.454404                | 3.027167  | -1.795017 |

|    |   |   |           |           |           |
|----|---|---|-----------|-----------|-----------|
| 20 | 1 | 0 | 0.560806  | 3.948928  | -2.358157 |
| 21 | 6 | 0 | 4.642367  | 1.332087  | -0.826153 |
| 22 | 6 | 0 | -4.628473 | 2.258263  | -2.331358 |
| 23 | 1 | 0 | -4.639069 | 1.375014  | -2.963894 |
| 24 | 6 | 0 | 5.002280  | 1.214588  | -2.174437 |
| 25 | 1 | 0 | 4.643317  | 0.370142  | -2.756530 |
| 26 | 6 | 0 | -4.014261 | 3.330317  | -0.248498 |
| 27 | 1 | 0 | -3.561721 | 3.279113  | 0.737780  |
| 28 | 6 | 0 | 0.185309  | 0.706163  | -0.367062 |
| 29 | 6 | 0 | 1.603799  | 2.313104  | -1.438535 |
| 30 | 1 | 0 | 2.578039  | 2.686571  | -1.730109 |
| 31 | 6 | 0 | -0.827866 | 2.583952  | -1.455544 |
| 32 | 1 | 0 | -1.690756 | 3.160256  | -1.766120 |
| 33 | 6 | 0 | -0.976809 | 1.395174  | -0.720559 |
| 34 | 6 | 0 | 5.812436  | 2.185570  | -2.760330 |
| 35 | 1 | 0 | 6.083544  | 2.092190  | -3.809347 |
| 36 | 6 | 0 | 2.501482  | 0.185694  | -0.214407 |
| 37 | 6 | 0 | -4.573665 | 4.524107  | -0.707739 |
| 38 | 1 | 0 | -4.548453 | 5.403262  | -0.068845 |
| 39 | 6 | 0 | -5.192087 | 3.453293  | -2.773656 |
| 40 | 1 | 0 | -5.648274 | 3.493805  | -3.759865 |
| 41 | 6 | 0 | 6.285744  | 3.281079  | -2.019177 |
| 42 | 6 | 0 | -5.172998 | 4.606956  | -1.972357 |
| 43 | 6 | 0 | 5.920911  | 3.375452  | -0.669102 |
| 44 | 1 | 0 | 6.275166  | 4.215312  | -0.076899 |
| 45 | 6 | 0 | 7.170154  | 4.320689  | -2.664111 |
| 46 | 1 | 0 | 6.708365  | 4.729322  | -3.571227 |
| 47 | 1 | 0 | 8.134599  | 3.890240  | -2.962934 |
| 48 | 1 | 0 | 7.371524  | 5.152306  | -1.981648 |
| 49 | 6 | 0 | -5.790947 | 5.893725  | -2.463497 |
| 50 | 1 | 0 | -5.546225 | 6.732403  | -1.804222 |
| 51 | 1 | 0 | -6.884970 | 5.814695  | -2.510625 |
| 52 | 1 | 0 | -5.444548 | 6.140981  | -3.474025 |
| 53 | 1 | 0 | 5.194650  | -0.617439 | 1.131935  |
| 54 | 1 | 0 | -4.960293 | -0.549082 | -0.817659 |
| 55 | 6 | 0 | -3.665732 | -1.480438 | 2.085450  |
| 56 | 6 | 0 | 3.195579  | -3.144527 | 0.967552  |
| 57 | 6 | 0 | 4.477210  | -3.665197 | 1.649149  |
| 58 | 1 | 0 | 4.461611  | -4.760225 | 1.701365  |
| 59 | 1 | 0 | 5.379045  | -3.375258 | 1.096679  |
| 60 | 1 | 0 | 4.568854  | -3.282648 | 2.673376  |
| 61 | 6 | 0 | 1.973637  | -3.654656 | 1.756699  |
| 62 | 1 | 0 | 2.014957  | -3.327973 | 2.803501  |
| 63 | 1 | 0 | 1.030073  | -3.292874 | 1.325929  |

|     |    |   |           |           |           |
|-----|----|---|-----------|-----------|-----------|
| 64  | 1  | 0 | 1.937433  | -4.750722 | 1.748058  |
| 65  | 6  | 0 | 3.134573  | -3.663753 | -0.479419 |
| 66  | 1  | 0 | 2.245180  | -3.295070 | -1.001048 |
| 67  | 1  | 0 | 4.012046  | -3.363959 | -1.064236 |
| 68  | 1  | 0 | 3.098716  | -4.759679 | -0.484768 |
| 69  | 6  | 0 | -2.648336 | -2.524071 | 2.584047  |
| 70  | 1  | 0 | -2.632765 | -3.411434 | 1.941101  |
| 71  | 1  | 0 | -1.635395 | -2.109971 | 2.628500  |
| 72  | 1  | 0 | -2.911386 | -2.849170 | 3.598135  |
| 73  | 6  | 0 | -5.069394 | -2.121525 | 2.110436  |
| 74  | 1  | 0 | -5.854680 | -1.416787 | 1.812582  |
| 75  | 1  | 0 | -5.124751 | -2.991431 | 1.442840  |
| 76  | 1  | 0 | -5.306668 | -2.465389 | 3.123874  |
| 77  | 6  | 0 | -3.631903 | -0.257091 | 3.017156  |
| 78  | 1  | 0 | -4.351384 | 0.515449  | 2.719981  |
| 79  | 1  | 0 | -3.888250 | -0.560599 | 4.039322  |
| 80  | 1  | 0 | -2.636234 | 0.193883  | 3.044067  |
| 81  | 8  | 0 | -1.141327 | -4.177701 | -0.077552 |
| 82  | 8  | 0 | -0.080285 | -1.831066 | -1.328776 |
| 83  | 6  | 0 | -1.324291 | -3.913742 | -1.244354 |
| 84  | 6  | 0 | -0.580966 | -2.762913 | -1.933613 |
| 85  | 8  | 0 | -2.122176 | -4.522897 | -2.100046 |
| 86  | 6  | 0 | -2.876479 | -5.663999 | -1.599050 |
| 87  | 1  | 0 | -3.424101 | -6.039100 | -2.461605 |
| 88  | 1  | 0 | -2.185765 | -6.416854 | -1.214263 |
| 89  | 1  | 0 | -3.560891 | -5.335610 | -0.814393 |
| 90  | 6  | 0 | -0.408810 | -2.776344 | -3.471969 |
| 91  | 9  | 0 | 0.070022  | -3.962629 | -3.866700 |
| 92  | 9  | 0 | 0.436797  | -1.816113 | -3.850032 |
| 93  | 9  | 0 | -1.596718 | -2.561697 | -4.054312 |
| 94  | 8  | 0 | 2.165273  | 1.124363  | 2.600074  |
| 95  | 8  | 0 | -0.053437 | -0.094496 | 2.435191  |
| 96  | 8  | 0 | 1.010480  | 0.195218  | 4.640609  |
| 97  | 16 | 0 | 0.926186  | 0.739993  | 3.282773  |
| 98  | 6  | 0 | -0.046960 | 2.320890  | 3.445557  |
| 99  | 9  | 0 | -1.204173 | 2.099456  | 4.077067  |
| 100 | 9  | 0 | 0.670071  | 3.204241  | 4.145880  |
| 101 | 9  | 0 | -0.306231 | 2.834980  | 2.235483  |

---

**TS2R<sub>endo</sub>-OTf**

Imaginary frequency= -149.48

Total energy= -3639.64902855

Sum of electronic and zero-point Energies= -3638.692148

Sum of electronic and thermal Energies= -3638.626260  
 Sum of electronic and thermal Enthalpies= -3638.625316  
 Sum of electronic and thermal Free Energies= -3638.799930

---

| Center<br>Number | Atomic<br>Number | Atomic<br>Type | Coordinates (Angstroms) |           |           |
|------------------|------------------|----------------|-------------------------|-----------|-----------|
|                  |                  |                | X                       | Y         | Z         |
| 1                | 45               | 0              | 0.225240                | -0.281247 | 0.572195  |
| 2                | 6                | 0              | -1.511346               | 2.565884  | 0.983481  |
| 3                | 1                | 0              | -2.441564               | 2.056157  | 0.730131  |
| 4                | 7                | 0              | -0.047956               | 3.717308  | -0.507118 |
| 5                | 6                | 0              | 0.392073                | 2.455452  | -0.306831 |
| 6                | 6                | 0              | 0.588793                | 4.810127  | -1.168883 |
| 7                | 7                | 0              | -0.386608               | 1.731730  | 0.479390  |
| 8                | 6                | 0              | -1.369326               | 3.865670  | 0.137948  |
| 9                | 1                | 0              | -1.379927               | 4.778892  | 0.736148  |
| 10               | 7                | 0              | 1.363048                | -2.022630 | 0.275899  |
| 11               | 6                | 0              | 2.637564                | -4.023842 | 0.101256  |
| 12               | 1                | 0              | 2.308436                | -4.768240 | -0.633698 |
| 13               | 7                | 0              | 3.244022                | -2.874651 | -0.600754 |
| 14               | 6                | 0              | 1.463069                | -3.374033 | 0.885003  |
| 15               | 1                | 0              | 1.767245                | -3.232869 | 1.928202  |
| 16               | 6                | 0              | 5.678390                | -2.797043 | -0.818807 |
| 17               | 1                | 0              | 5.741695                | -2.494744 | 0.222230  |
| 18               | 6                | 0              | 2.609947                | -0.444548 | -1.012770 |
| 19               | 6                | 0              | 3.542776                | 1.416882  | -2.246305 |
| 20               | 1                | 0              | 4.300770                | 1.807375  | -2.917830 |
| 21               | 6                | 0              | 4.425110                | -3.014849 | -1.397569 |
| 22               | 6                | 0              | 0.039738                | 5.319989  | -2.352536 |
| 23               | 1                | 0              | -0.839869               | 4.850550  | -2.784574 |
| 24               | 6                | 0              | 4.332494                | -3.407753 | -2.738059 |
| 25               | 1                | 0              | 3.357102                | -3.581812 | -3.183088 |
| 26               | 6                | 0              | 1.721050                | 5.417065  | -0.614046 |
| 27               | 1                | 0              | 2.140647                | 5.034566  | 0.311457  |
| 28               | 6                | 0              | 1.629114                | 0.432596  | -0.540803 |
| 29               | 6                | 0              | 3.588652                | 0.067979  | -1.879767 |
| 30               | 1                | 0              | 4.375858                | -0.564914 | -2.271137 |
| 31               | 6                | 0              | 2.544743                | 2.276685  | -1.774758 |
| 32               | 1                | 0              | 2.541006                | 3.311897  | -2.091777 |
| 33               | 6                | 0              | 1.564060                | 1.783211  | -0.898324 |
| 34               | 6                | 0              | 5.493037                | -3.562234 | -3.494508 |
| 35               | 1                | 0              | 5.414571                | -3.859436 | -4.537125 |
| 36               | 6                | 0              | 2.430504                | -1.804688 | -0.476244 |
| 37               | 6                | 0              | 2.309576                | 6.508695  | -1.256057 |

---

|    |   |   |           |           |           |
|----|---|---|-----------|-----------|-----------|
| 38 | 1 | 0 | 3.194528  | 6.965788  | -0.820098 |
| 39 | 6 | 0 | 0.628529  | 6.419204  | -2.974923 |
| 40 | 1 | 0 | 0.195414  | 6.803915  | -3.894881 |
| 41 | 6 | 0 | 6.762211  | -3.339040 | -2.934389 |
| 42 | 6 | 0 | 1.772913  | 7.032747  | -2.440364 |
| 43 | 6 | 0 | 6.833196  | -2.956348 | -1.587044 |
| 44 | 1 | 0 | 7.803763  | -2.776712 | -1.132560 |
| 45 | 6 | 0 | 8.011563  | -3.519602 | -3.762613 |
| 46 | 1 | 0 | 7.930572  | -3.000376 | -4.723941 |
| 47 | 1 | 0 | 8.188607  | -4.580280 | -3.985019 |
| 48 | 1 | 0 | 8.894920  | -3.138162 | -3.240613 |
| 49 | 6 | 0 | 2.386233  | 8.239431  | -3.109312 |
| 50 | 1 | 0 | 3.426038  | 8.384938  | -2.797648 |
| 51 | 1 | 0 | 1.834917  | 9.153656  | -2.852303 |
| 52 | 1 | 0 | 2.363196  | 8.146114  | -4.201082 |
| 53 | 1 | 0 | 3.371388  | -4.491031 | 0.761274  |
| 54 | 1 | 0 | -2.149560 | 3.944814  | -0.627055 |
| 55 | 6 | 0 | -1.539156 | 2.799944  | 2.529067  |
| 56 | 6 | 0 | 0.143462  | -4.188226 | 0.915980  |
| 57 | 6 | 0 | 0.443014  | -5.558978 | 1.555448  |
| 58 | 1 | 0 | -0.484880 | -6.130749 | 1.676552  |
| 59 | 1 | 0 | 1.121334  | -6.160704 | 0.938339  |
| 60 | 1 | 0 | 0.897571  | -5.444347 | 2.547446  |
| 61 | 6 | 0 | -0.866354 | -3.440029 | 1.806065  |
| 62 | 1 | 0 | -0.472537 | -3.302782 | 2.820191  |
| 63 | 1 | 0 | -1.102710 | -2.448155 | 1.400086  |
| 64 | 1 | 0 | -1.803473 | -4.004556 | 1.884282  |
| 65 | 6 | 0 | -0.452063 | -4.393583 | -0.487876 |
| 66 | 1 | 0 | -0.669296 | -3.438050 | -0.975089 |
| 67 | 1 | 0 | 0.221852  | -4.958289 | -1.144483 |
| 68 | 1 | 0 | -1.386704 | -4.963058 | -0.420394 |
| 69 | 6 | 0 | -1.735456 | 1.456896  | 3.257648  |
| 70 | 1 | 0 | -2.639666 | 0.947396  | 2.906340  |
| 71 | 1 | 0 | -0.884140 | 0.790172  | 3.110248  |
| 72 | 1 | 0 | -1.840759 | 1.630115  | 4.337047  |
| 73 | 6 | 0 | -2.762360 | 3.687591  | 2.848244  |
| 74 | 1 | 0 | -2.680083 | 4.694393  | 2.423848  |
| 75 | 1 | 0 | -3.689710 | 3.237449  | 2.472207  |
| 76 | 1 | 0 | -2.864830 | 3.801826  | 3.933759  |
| 77 | 6 | 0 | -0.256951 | 3.484956  | 3.033725  |
| 78 | 1 | 0 | -0.112923 | 4.473871  | 2.581107  |
| 79 | 1 | 0 | -0.309849 | 3.632738  | 4.119392  |
| 80 | 1 | 0 | 0.630154  | 2.880587  | 2.824559  |
| 81 | 8 | 0 | -0.733419 | -0.738966 | -1.243476 |

|     |    |   |            |           |           |
|-----|----|---|------------|-----------|-----------|
| 82  | 8  | 0 | -2.755241  | -0.414513 | 0.578456  |
| 83  | 6  | 0 | -1.913895  | -0.765499 | -1.609356 |
| 84  | 6  | 0 | -3.094263  | -0.582658 | -0.624997 |
| 85  | 8  | 0 | -2.240862  | -0.938100 | -2.865140 |
| 86  | 6  | 0 | -1.173224  | -1.059991 | -3.849903 |
| 87  | 1  | 0 | -1.686255  | -1.186859 | -4.801415 |
| 88  | 1  | 0 | -0.570633  | -0.149218 | -3.851604 |
| 89  | 1  | 0 | -0.556715  | -1.929894 | -3.619725 |
| 90  | 6  | 0 | -4.129062  | 0.445706  | -1.174349 |
| 91  | 9  | 0 | -3.471969  | 1.599964  | -1.473028 |
| 92  | 9  | 0 | -5.041577  | 0.728984  | -0.234736 |
| 93  | 9  | 0 | -4.778250  | 0.071626  | -2.291619 |
| 94  | 6  | 0 | -8.715211  | -1.383101 | -0.017712 |
| 95  | 6  | 0 | -7.415910  | -1.627371 | 0.412472  |
| 96  | 6  | 0 | -6.428647  | -2.092155 | -0.490274 |
| 97  | 6  | 0 | -6.807675  | -2.317670 | -1.836112 |
| 98  | 6  | 0 | -8.113820  | -2.092053 | -2.255221 |
| 99  | 6  | 0 | -9.069975  | -1.620115 | -1.349972 |
| 100 | 1  | 0 | -9.453649  | -1.010886 | 0.684979  |
| 101 | 1  | 0 | -7.159951  | -1.424260 | 1.445707  |
| 102 | 1  | 0 | -6.087829  | -2.710091 | -2.545116 |
| 103 | 1  | 0 | -8.389320  | -2.289445 | -3.286915 |
| 104 | 1  | 0 | -10.089376 | -1.442698 | -1.680479 |
| 105 | 6  | 0 | -5.062685  | -2.336843 | -0.045273 |
| 106 | 6  | 0 | -4.722432  | -2.497257 | 1.389477  |
| 107 | 1  | 0 | -4.084988  | -1.628842 | 1.657683  |
| 108 | 1  | 0 | -5.575140  | -2.561555 | 2.063469  |
| 109 | 1  | 0 | -4.082654  | -3.374881 | 1.533947  |
| 110 | 6  | 0 | -3.960929  | -2.304126 | -0.929934 |
| 111 | 1  | 0 | -3.101759  | -2.898851 | -0.624116 |
| 112 | 1  | 0 | -4.147588  | -2.308980 | -1.998159 |
| 113 | 8  | 0 | 3.621427   | -0.501788 | 2.302884  |
| 114 | 8  | 0 | 1.214556   | 0.259436  | 2.300992  |
| 115 | 8  | 0 | 1.932180   | -1.648456 | 3.776138  |
| 116 | 16 | 0 | 2.357771   | -0.442011 | 3.049861  |
| 117 | 6  | 0 | 2.603833   | 0.866413  | 4.352387  |
| 118 | 9  | 0 | 1.473753   | 1.062966  | 5.039194  |
| 119 | 9  | 0 | 3.561704   | 0.466534  | 5.194967  |
| 120 | 9  | 0 | 2.977509   | 2.020665  | 3.787460  |

---

**TS2S<sub>endo</sub>-OTf**

Imaginary frequency= -167.63

Total energy= -3639.64442889

Sum of electronic and zero-point Energies= -3638.688481  
 Sum of electronic and thermal Energies= -3638.622291  
 Sum of electronic and thermal Enthalpies= -3638.621347  
 Sum of electronic and thermal Free Energies= -3638.795563

---

| Center<br>Number | Atomic<br>Number | Atomic<br>Type | Coordinates (Angstroms) |           |           |
|------------------|------------------|----------------|-------------------------|-----------|-----------|
|                  |                  |                | X                       | Y         | Z         |
| 1                | 45               | 0              | 0.272655                | -0.266417 | 0.766378  |
| 2                | 6                | 0              | -1.708264               | 2.397997  | 1.303731  |
| 3                | 1                | 0              | -2.580839               | 1.777871  | 1.076563  |
| 4                | 7                | 0              | -0.458238               | 3.681982  | -0.271473 |
| 5                | 6                | 0              | 0.129760                | 2.482321  | -0.075111 |
| 6                | 6                | 0              | -0.119664               | 4.698392  | -1.222097 |
| 7                | 7                | 0              | -0.505927               | 1.698642  | 0.779062  |
| 8                | 6                | 0              | -1.743411               | 3.705761  | 0.453869  |
| 9                | 1                | 0              | -1.807209               | 4.612332  | 1.058872  |
| 10               | 7                | 0              | 1.510029                | -1.915665 | 0.310973  |
| 11               | 6                | 0              | 3.089920                | -3.697440 | 0.208799  |
| 12               | 1                | 0              | 2.910762                | -4.521424 | -0.490369 |
| 13               | 7                | 0              | 3.503611                | -2.499686 | -0.544616 |
| 14               | 6                | 0              | 1.800493                | -3.229732 | 0.943211  |
| 15               | 1                | 0              | 2.046519                | -3.033900 | 1.993667  |
| 16               | 6                | 0              | 5.905745                | -2.197883 | -0.910778 |
| 17               | 1                | 0              | 6.005883                | -1.892027 | 0.126432  |
| 18               | 6                | 0              | 2.569994                | -0.178227 | -0.946660 |
| 19               | 6                | 0              | 3.297413                | 1.800812  | -2.136082 |
| 20               | 1                | 0              | 3.998108                | 2.279858  | -2.812718 |
| 21               | 6                | 0              | 4.641105                | -2.524846 | -1.414082 |
| 22               | 6                | 0              | -0.575785               | 4.608402  | -2.540891 |
| 23               | 1                | 0              | -1.166387               | 3.750660  | -2.850948 |
| 24               | 6                | 0              | 4.503945                | -2.926564 | -2.746024 |
| 25               | 1                | 0              | 3.523907                | -3.194225 | -3.131192 |
| 26               | 6                | 0              | 0.627627                | 5.810973  | -0.818487 |
| 27               | 1                | 0              | 0.971911                | 5.880980  | 0.209408  |
| 28               | 6                | 0              | 1.541174                | 0.594553  | -0.404019 |
| 29               | 6                | 0              | 3.467228                | 0.446911  | -1.827758 |
| 30               | 1                | 0              | 4.288504                | -0.102947 | -2.271061 |
| 31               | 6                | 0              | 2.244450                | 2.551630  | -1.603556 |
| 32               | 1                | 0              | 2.141585                | 3.595326  | -1.874911 |
| 33               | 6                | 0              | 1.336823                | 1.939709  | -0.723348 |
| 34               | 6                | 0              | 5.626845                | -2.978969 | -3.574179 |
| 35               | 1                | 0              | 5.510937                | -3.286913 | -4.610222 |
| 36               | 6                | 0              | 2.543693                | -1.560702 | -0.437472 |

|    |   |   |           |           |           |
|----|---|---|-----------|-----------|-----------|
| 37 | 6 | 0 | 0.929763  | 6.813723  | -1.738565 |
| 38 | 1 | 0 | 1.515782  | 7.671888  | -1.418336 |
| 39 | 6 | 0 | -0.266426 | 5.618575  | -3.452996 |
| 40 | 1 | 0 | -0.620069 | 5.537860  | -4.477748 |
| 41 | 6 | 0 | 6.899901  | -2.645864 | -3.091307 |
| 42 | 6 | 0 | 0.492225  | 6.733928  | -3.070943 |
| 43 | 6 | 0 | 7.019129  | -2.256744 | -1.746797 |
| 44 | 1 | 0 | 7.997452  | -1.994434 | -1.351192 |
| 45 | 6 | 0 | 8.115965  | -2.704328 | -3.983761 |
| 46 | 1 | 0 | 8.631336  | -1.736474 | -4.017277 |
| 47 | 1 | 0 | 7.847503  | -2.979608 | -5.008498 |
| 48 | 1 | 0 | 8.842909  | -3.440078 | -3.616936 |
| 49 | 6 | 0 | 0.841804  | 7.817855  | -4.061700 |
| 50 | 1 | 0 | 0.577280  | 8.810228  | -3.677369 |
| 51 | 1 | 0 | 0.321851  | 7.672552  | -5.013892 |
| 52 | 1 | 0 | 1.920026  | 7.831641  | -4.267587 |
| 53 | 1 | 0 | 3.880690  | -3.997719 | 0.900255  |
| 54 | 1 | 0 | -2.569891 | 3.717336  | -0.266227 |
| 55 | 6 | 0 | -1.716686 | 2.640098  | 2.847684  |
| 56 | 6 | 0 | 0.639909  | -4.261079 | 0.931833  |
| 57 | 6 | 0 | 1.161811  | -5.570275 | 1.560295  |
| 58 | 1 | 0 | 0.345915  | -6.297866 | 1.644259  |
| 59 | 1 | 0 | 1.953251  | -6.033645 | 0.959612  |
| 60 | 1 | 0 | 1.559732  | -5.396621 | 2.568067  |
| 61 | 6 | 0 | -0.507929 | -3.732078 | 1.810047  |
| 62 | 1 | 0 | -0.163731 | -3.548870 | 2.836306  |
| 63 | 1 | 0 | -0.927422 | -2.798935 | 1.422020  |
| 64 | 1 | 0 | -1.324563 | -4.462248 | 1.857167  |
| 65 | 6 | 0 | 0.130691  | -4.539438 | -0.492939 |
| 66 | 1 | 0 | -0.253558 | -3.630729 | -0.967661 |
| 67 | 1 | 0 | 0.916481  | -4.949138 | -1.138861 |
| 68 | 1 | 0 | -0.682112 | -5.273705 | -0.466390 |
| 69 | 6 | 0 | -1.734684 | 1.289412  | 3.588375  |
| 70 | 1 | 0 | -2.598734 | 0.682514  | 3.291929  |
| 71 | 1 | 0 | -0.826042 | 0.712166  | 3.400854  |
| 72 | 1 | 0 | -1.802449 | 1.457812  | 4.670540  |
| 73 | 6 | 0 | -3.013208 | 3.395401  | 3.208712  |
| 74 | 1 | 0 | -3.059292 | 4.396171  | 2.764059  |
| 75 | 1 | 0 | -3.903072 | 2.839627  | 2.886047  |
| 76 | 1 | 0 | -3.078192 | 3.520458  | 4.295853  |
| 77 | 6 | 0 | -0.497044 | 3.459534  | 3.301006  |
| 78 | 1 | 0 | -0.455627 | 4.444066  | 2.818752  |
| 79 | 1 | 0 | -0.541009 | 3.630654  | 4.383477  |
| 80 | 1 | 0 | 0.436965  | 2.933619  | 3.087373  |



|     |    |   |           |           |           |
|-----|----|---|-----------|-----------|-----------|
| 81  | 8  | 0 | -0.795074 | -0.644557 | -1.008112 |
| 82  | 8  | 0 | -2.688027 | -1.187426 | 0.926578  |
| 83  | 6  | 0 | -1.898613 | -1.113337 | -1.309449 |
| 84  | 6  | 0 | -3.003120 | -1.396487 | -0.266205 |
| 85  | 8  | 0 | -2.203013 | -1.412277 | -2.547379 |
| 86  | 6  | 0 | -1.194438 | -1.206015 | -3.578768 |
| 87  | 1  | 0 | -1.668512 | -1.538625 | -4.500410 |
| 88  | 1  | 0 | -0.937464 | -0.146587 | -3.632716 |
| 89  | 1  | 0 | -0.311093 | -1.806658 | -3.356453 |
| 90  | 6  | 0 | -3.801052 | -2.705353 | -0.536327 |
| 91  | 9  | 0 | -4.452255 | -2.752586 | -1.711108 |
| 92  | 9  | 0 | -4.695411 | -2.901412 | 0.444532  |
| 93  | 9  | 0 | -2.935499 | -3.747371 | -0.518492 |
| 94  | 6  | 0 | -8.710756 | -1.946125 | -0.186068 |
| 95  | 6  | 0 | -7.549495 | -1.334557 | 0.273489  |
| 96  | 6  | 0 | -6.647128 | -0.726470 | -0.629585 |
| 97  | 6  | 0 | -6.967941 | -0.739506 | -2.007111 |
| 98  | 6  | 0 | -8.140973 | -1.333747 | -2.459091 |
| 99  | 6  | 0 | -9.013282 | -1.943584 | -1.551716 |
| 100 | 1  | 0 | -9.382769 | -2.424151 | 0.520488  |
| 101 | 1  | 0 | -7.323759 | -1.360558 | 1.333642  |
| 102 | 1  | 0 | -6.315270 | -0.246315 | -2.719250 |
| 103 | 1  | 0 | -8.379699 | -1.317740 | -3.518408 |
| 104 | 1  | 0 | -9.928032 | -2.409844 | -1.906705 |
| 105 | 6  | 0 | -5.419413 | -0.091912 | -0.153886 |
| 106 | 6  | 0 | -5.286380 | 0.377014  | 1.254484  |
| 107 | 1  | 0 | -4.929650 | 1.412715  | 1.270139  |
| 108 | 1  | 0 | -6.203222 | 0.310877  | 1.839337  |
| 109 | 1  | 0 | -4.489459 | -0.221936 | 1.732997  |
| 110 | 6  | 0 | -4.278615 | 0.023125  | -0.959419 |
| 111 | 1  | 0 | -3.590840 | 0.827490  | -0.710111 |
| 112 | 1  | 0 | -4.347823 | -0.211621 | -2.015770 |
| 113 | 8  | 0 | 1.266714  | 0.174752  | 2.521841  |
| 114 | 8  | 0 | 2.508586  | -0.571810 | 4.515246  |
| 115 | 8  | 0 | 3.567237  | -0.856145 | 2.245692  |
| 116 | 16 | 0 | 2.647020  | -0.126852 | 3.124923  |
| 117 | 6  | 0 | 3.363706  | 1.589446  | 3.232844  |
| 118 | 9  | 0 | 4.623878  | 1.510566  | 3.672512  |
| 119 | 9  | 0 | 3.363568  | 2.174839  | 2.026833  |
| 120 | 9  | 0 | 2.655958  | 2.345317  | 4.079011  |

---

**TS2R<sub>exo</sub>-OTf**

Imaginary frequency= -122.81

Total energy= -3639.64827207  
Sum of electronic and zero-point Energies= -3638.691804  
Sum of electronic and thermal Energies= -3638.625564  
Sum of electronic and thermal Enthalpies= -3638.624620  
Sum of electronic and thermal Free Energies= -3638.797560

---

| Center<br>Number | Atomic<br>Number | Atomic<br>Type | Coordinates (Angstroms) |           |           |
|------------------|------------------|----------------|-------------------------|-----------|-----------|
|                  |                  |                | X                       | Y         | Z         |
| 1                | 45               | 0              | -0.083093               | -0.436463 | -0.952256 |
| 2                | 6                | 0              | 1.840841                | 2.196464  | -1.854965 |
| 3                | 1                | 0              | 2.724347                | 1.557847  | -1.948077 |
| 4                | 7                | 0              | 1.161303                | 3.389992  | 0.104617  |
| 5                | 6                | 0              | 0.496845                | 2.213059  | 0.019069  |
| 6                | 6                | 0              | 0.760501                | 4.569808  | 0.799682  |
| 7                | 7                | 0              | 0.840693                | 1.467424  | -1.018642 |
| 8                | 6                | 0              | 2.180521                | 3.432801  | -0.968065 |
| 9                | 1                | 0              | 2.101025                | 4.380551  | -1.501793 |
| 10               | 7                | 0              | -1.374118               | -2.034595 | -0.346753 |
| 11               | 6                | 0              | -3.318312               | -3.421311 | -0.173752 |
| 12               | 1                | 0              | -3.392379               | -4.425237 | 0.249759  |
| 13               | 7                | 0              | -3.197871               | -2.433364 | 0.913027  |
| 14               | 6                | 0              | -2.025304               | -3.202813 | -1.015633 |
| 15               | 1                | 0              | -2.299343               | -2.883404 | -2.024915 |
| 16               | 6                | 0              | -5.209818               | -1.159025 | 1.515355  |
| 17               | 1                | 0              | -5.068443               | -0.541443 | 0.633816  |
| 18               | 6                | 0              | -1.769050               | -0.404133 | 1.367869  |
| 19               | 6                | 0              | -1.756095               | 1.369267  | 3.011518  |
| 20               | 1                | 0              | -2.085646               | 1.760032  | 3.969164  |
| 21               | 6                | 0              | -4.292252               | -2.177712 | 1.800115  |
| 22               | 6                | 0              | -0.538704               | 5.078304  | 0.658872  |
| 23               | 1                | 0              | -1.257087               | 4.559230  | 0.030614  |
| 24               | 6                | 0              | -4.475765               | -2.987870 | 2.923782  |
| 25               | 1                | 0              | -3.766149               | -3.783168 | 3.133990  |
| 26               | 6                | 0              | 1.692169                | 5.257235  | 1.583861  |
| 27               | 1                | 0              | 2.700090                | 4.866879  | 1.692760  |
| 28               | 6                | 0              | -0.887977               | 0.363519  | 0.606485  |
| 29               | 6                | 0              | -2.206537               | 0.110650  | 2.597877  |
| 30               | 1                | 0              | -2.876129               | -0.455553 | 3.234722  |
| 31               | 6                | 0              | -0.896525               | 2.139739  | 2.222017  |
| 32               | 1                | 0              | -0.573900               | 3.110495  | 2.579070  |
| 33               | 6                | 0              | -0.454577               | 1.637809  | 0.986198  |
| 34               | 6                | 0              | -5.565882               | -2.767062 | 3.767286  |
| 35               | 1                | 0              | -5.701635               | -3.401248 | 4.639852  |

|    |   |   |           |           |           |
|----|---|---|-----------|-----------|-----------|
| 36 | 6 | 0 | -2.120564 | -1.658706 | 0.681547  |
| 37 | 6 | 0 | 1.320300  | 6.436845  | 2.230361  |
| 38 | 1 | 0 | 2.051971  | 6.961551  | 2.839496  |
| 39 | 6 | 0 | -0.900374 | 6.246840  | 1.325793  |
| 40 | 1 | 0 | -1.912976 | 6.627962  | 1.216562  |
| 41 | 6 | 0 | -6.486306 | -1.740547 | 3.509754  |
| 42 | 6 | 0 | 0.020624  | 6.950033  | 2.119161  |
| 43 | 6 | 0 | -6.289681 | -0.944283 | 2.370118  |
| 44 | 1 | 0 | -6.995784 | -0.148367 | 2.145627  |
| 45 | 6 | 0 | -7.645593 | -1.480315 | 4.441435  |
| 46 | 1 | 0 | -7.424149 | -0.646852 | 5.121874  |
| 47 | 1 | 0 | -7.869160 | -2.356794 | 5.058122  |
| 48 | 1 | 0 | -8.551226 | -1.210241 | 3.886822  |
| 49 | 6 | 0 | -0.379889 | 8.227680  | 2.816028  |
| 50 | 1 | 0 | 0.396210  | 8.564255  | 3.510656  |
| 51 | 1 | 0 | -1.310746 | 8.098869  | 3.381161  |
| 52 | 1 | 0 | -0.554337 | 9.036276  | 2.094116  |
| 53 | 1 | 0 | -4.226331 | -3.217768 | -0.748519 |
| 54 | 1 | 0 | 3.182962  | 3.365724  | -0.533562 |
| 55 | 6 | 0 | 1.419583  | 2.564818  | -3.317603 |
| 56 | 6 | 0 | -1.162099 | -4.493260 | -1.161065 |
| 57 | 6 | 0 | -2.034225 | -5.579830 | -1.827915 |
| 58 | 1 | 0 | -1.424685 | -6.466785 | -2.037955 |
| 59 | 1 | 0 | -2.868755 | -5.903424 | -1.195860 |
| 60 | 1 | 0 | -2.448314 | -5.227593 | -2.781290 |
| 61 | 6 | 0 | 0.022133  | -4.217299 | -2.099062 |
| 62 | 1 | 0 | -0.321317 | -3.859554 | -3.078147 |
| 63 | 1 | 0 | 0.689684  | -3.464480 | -1.684476 |
| 64 | 1 | 0 | 0.605700  | -5.132025 | -2.259695 |
| 65 | 6 | 0 | -0.648691 | -5.000730 | 0.197200  |
| 66 | 1 | 0 | -0.016038 | -4.256877 | 0.690325  |
| 67 | 1 | 0 | -1.469929 | -5.254257 | 0.878183  |
| 68 | 1 | 0 | -0.049805 | -5.909034 | 0.058461  |
| 69 | 6 | 0 | 1.150323  | 1.294294  | -4.143503 |
| 70 | 1 | 0 | 2.022595  | 0.631300  | -4.154084 |
| 71 | 1 | 0 | 0.295452  | 0.734308  | -3.760531 |
| 72 | 1 | 0 | 0.929273  | 1.570878  | -5.182111 |
| 73 | 6 | 0 | 2.616435  | 3.297915  | -3.965085 |
| 74 | 1 | 0 | 2.834853  | 4.259909  | -3.488048 |
| 75 | 1 | 0 | 3.528607  | 2.687776  | -3.928038 |
| 76 | 1 | 0 | 2.397336  | 3.501942  | -5.019551 |
| 77 | 6 | 0 | 0.177925  | 3.470349  | -3.358601 |
| 78 | 1 | 0 | 0.321429  | 4.403167  | -2.799842 |
| 79 | 1 | 0 | -0.044831 | 3.746867  | -4.396276 |

|     |    |   |           |           |           |
|-----|----|---|-----------|-----------|-----------|
| 80  | 1  | 0 | -0.700725 | 2.959317  | -2.958715 |
| 81  | 8  | 0 | 1.723573  | -1.327729 | -2.382787 |
| 82  | 8  | 0 | 1.381556  | -1.258498 | 0.281376  |
| 83  | 6  | 0 | 2.629284  | -1.755030 | -1.678480 |
| 84  | 6  | 0 | 2.480888  | -1.700989 | -0.157925 |
| 85  | 8  | 0 | 3.736567  | -2.316773 | -2.105231 |
| 86  | 6  | 0 | 3.887822  | -2.477328 | -3.545939 |
| 87  | 1  | 0 | 4.820411  | -3.025279 | -3.668626 |
| 88  | 1  | 0 | 3.044919  | -3.045261 | -3.943149 |
| 89  | 1  | 0 | 3.948072  | -1.495678 | -4.019422 |
| 90  | 6  | 0 | 3.107086  | -2.835051 | 0.680155  |
| 91  | 9  | 0 | 2.479862  | -3.988113 | 0.353793  |
| 92  | 9  | 0 | 2.909072  | -2.613547 | 1.987183  |
| 93  | 9  | 0 | 4.413295  | -3.014483 | 0.463862  |
| 94  | 6  | 0 | 6.761054  | -1.708715 | 3.876439  |
| 95  | 6  | 0 | 5.589451  | -1.162398 | 3.361632  |
| 96  | 6  | 0 | 5.544773  | -0.664273 | 2.039800  |
| 97  | 6  | 0 | 6.726990  | -0.719863 | 1.264446  |
| 98  | 6  | 0 | 7.900220  | -1.248870 | 1.790424  |
| 99  | 6  | 0 | 7.920564  | -1.749779 | 3.096317  |
| 100 | 1  | 0 | 6.770830  | -2.102399 | 4.888492  |
| 101 | 1  | 0 | 4.698209  | -1.157129 | 3.978650  |
| 102 | 1  | 0 | 6.735773  | -0.309879 | 0.260160  |
| 103 | 1  | 0 | 8.802219  | -1.265326 | 1.185751  |
| 104 | 1  | 0 | 8.836985  | -2.165611 | 3.505435  |
| 105 | 6  | 0 | 4.317029  | -0.091144 | 1.480087  |
| 106 | 6  | 0 | 3.290809  | 0.539596  | 2.374781  |
| 107 | 1  | 0 | 3.406584  | 0.281292  | 3.427296  |
| 108 | 1  | 0 | 3.377879  | 1.632233  | 2.295144  |
| 109 | 1  | 0 | 2.278036  | 0.277074  | 2.047985  |
| 110 | 6  | 0 | 4.065400  | -0.100058 | 0.115267  |
| 111 | 1  | 0 | 3.324855  | 0.590067  | -0.271302 |
| 112 | 1  | 0 | 4.815260  | -0.451638 | -0.584182 |
| 113 | 8  | 0 | -3.683975 | -0.805552 | -1.961057 |
| 114 | 8  | 0 | -1.463034 | 0.377407  | -2.276033 |
| 115 | 8  | 0 | -3.188880 | 0.592220  | -3.998305 |
| 116 | 16 | 0 | -2.963013 | 0.315072  | -2.576476 |
| 117 | 6  | 0 | -3.634107 | 1.818960  | -1.694869 |
| 118 | 9  | 0 | -2.909222 | 2.911240  | -1.971887 |
| 119 | 9  | 0 | -4.893615 | 2.025445  | -2.091280 |
| 120 | 9  | 0 | -3.629202 | 1.632329  | -0.367205 |

---

**TS2S<sub>exo</sub>-OTf**

Imaginary frequency= -205.63  
 Total energy= -3639.65288296  
 Sum of electronic and zero-point Energies= -3638.695998  
 Sum of electronic and thermal Energies= -3638.629934  
 Sum of electronic and thermal Enthalpies= -3638.628990  
 Sum of electronic and thermal Free Energies= -3638.801323

---

| Center<br>Number | Atomic<br>Number | Atomic<br>Type | Coordinates (Angstroms) |           |           |
|------------------|------------------|----------------|-------------------------|-----------|-----------|
|                  |                  |                | X                       | Y         | Z         |
| 1                | 45               | 0              | -0.243213               | -0.043918 | -0.984909 |
| 2                | 6                | 0              | 1.525091                | 2.738727  | -1.636419 |
| 3                | 1                | 0              | 2.337082                | 2.080984  | -1.960911 |
| 4                | 7                | 0              | 1.111787                | 3.538259  | 0.567727  |
| 5                | 6                | 0              | 0.368771                | 2.435801  | 0.329335  |
| 6                | 6                | 0              | 1.285241                | 4.249053  | 1.799082  |
| 7                | 7                | 0              | 0.539789                | 1.918494  | -0.878165 |
| 8                | 6                | 0              | 2.050341                | 3.728535  | -0.554730 |
| 9                | 1                | 0              | 2.031763                | 4.770707  | -0.878475 |
| 10               | 7                | 0              | -1.392815               | -1.793566 | -0.492093 |
| 11               | 6                | 0              | -3.285567               | -3.266312 | -0.366351 |
| 12               | 1                | 0              | -3.224877               | -4.320428 | -0.083207 |
| 13               | 7                | 0              | -3.110057               | -2.423179 | 0.825395  |
| 14               | 6                | 0              | -2.128538               | -2.813246 | -1.307038 |
| 15               | 1                | 0              | -2.550316               | -2.288165 | -2.171994 |
| 16               | 6                | 0              | -5.173296               | -1.552555 | 1.829635  |
| 17               | 1                | 0              | -5.255083               | -0.844716 | 1.010609  |
| 18               | 6                | 0              | -1.730415               | -0.411071 | 1.447728  |
| 19               | 6                | 0              | -1.720082               | 1.162462  | 3.285452  |
| 20               | 1                | 0              | -2.026408               | 1.426764  | 4.292800  |
| 21               | 6                | 0              | -4.080288               | -2.424638 | 1.878266  |
| 22               | 6                | 0              | 0.517337                | 5.385212  | 2.065357  |
| 23               | 1                | 0              | -0.234839               | 5.704103  | 1.349555  |
| 24               | 6                | 0              | -3.962783               | -3.341821 | 2.927073  |
| 25               | 1                | 0              | -3.112454               | -4.017677 | 2.956507  |
| 26               | 6                | 0              | 2.261691                | 3.835850  | 2.713947  |
| 27               | 1                | 0              | 2.860099                | 2.954029  | 2.500804  |
| 28               | 6                | 0              | -0.949117               | 0.494789  | 0.728735  |
| 29               | 6                | 0              | -2.117099               | -0.068887 | 2.753060  |
| 30               | 1                | 0              | -2.715182               | -0.742496 | 3.355208  |
| 31               | 6                | 0              | -0.934188               | 2.059970  | 2.555563  |
| 32               | 1                | 0              | -0.645533               | 3.002614  | 3.004342  |
| 33               | 6                | 0              | -0.525744               | 1.720256  | 1.255234  |
| 34               | 6                | 0              | -4.933451               | -3.377228 | 3.928771  |

---

|    |   |   |           |           |           |
|----|---|---|-----------|-----------|-----------|
| 35 | 1 | 0 | -4.833163 | -4.089597 | 4.744040  |
| 36 | 6 | 0 | -2.074402 | -1.587565 | 0.631444  |
| 37 | 6 | 0 | 2.452929  | 4.553290  | 3.893084  |
| 38 | 1 | 0 | 3.208499  | 4.221980  | 4.601503  |
| 39 | 6 | 0 | 0.715883  | 6.093326  | 3.252414  |
| 40 | 1 | 0 | 0.108486  | 6.971476  | 3.456727  |
| 41 | 6 | 0 | -6.036048 | -2.509804 | 3.900213  |
| 42 | 6 | 0 | 1.685488  | 5.693576  | 4.182774  |
| 43 | 6 | 0 | -6.135100 | -1.597114 | 2.838679  |
| 44 | 1 | 0 | -6.978052 | -0.911313 | 2.800137  |
| 45 | 6 | 0 | -7.104955 | -2.578899 | 4.963978  |
| 46 | 1 | 0 | -7.571613 | -1.601486 | 5.127223  |
| 47 | 1 | 0 | -6.699635 | -2.931671 | 5.918341  |
| 48 | 1 | 0 | -7.903262 | -3.274787 | 4.671955  |
| 49 | 6 | 0 | 1.919146  | 6.476940  | 5.451914  |
| 50 | 1 | 0 | 2.034413  | 5.813191  | 6.316520  |
| 51 | 1 | 0 | 1.092678  | 7.165053  | 5.655781  |
| 52 | 1 | 0 | 2.838230  | 7.073993  | 5.381248  |
| 53 | 1 | 0 | -4.272808 | -3.084749 | -0.801372 |
| 54 | 1 | 0 | 3.066723  | 3.488664  | -0.224085 |
| 55 | 6 | 0 | 0.979871  | 3.445317  | -2.920053 |
| 56 | 6 | 0 | -1.302737 | -4.004140 | -1.879839 |
| 57 | 6 | 0 | -2.272875 | -4.917080 | -2.661637 |
| 58 | 1 | 0 | -1.717246 | -5.734602 | -3.136299 |
| 59 | 1 | 0 | -3.033874 | -5.371884 | -2.017691 |
| 60 | 1 | 0 | -2.788826 | -4.360924 | -3.454535 |
| 61 | 6 | 0 | -0.255178 | -3.480599 | -2.874113 |
| 62 | 1 | 0 | -0.722002 | -2.873066 | -3.659437 |
| 63 | 1 | 0 | 0.496858  | -2.863587 | -2.382087 |
| 64 | 1 | 0 | 0.260988  | -4.318120 | -3.359586 |
| 65 | 6 | 0 | -0.611507 | -4.814664 | -0.769937 |
| 66 | 1 | 0 | -0.003778 | -4.171934 | -0.124281 |
| 67 | 1 | 0 | -1.329715 | -5.341166 | -0.130463 |
| 68 | 1 | 0 | 0.046984  | -5.574112 | -1.208252 |
| 69 | 6 | 0 | 0.471741  | 2.397908  | -3.926689 |
| 70 | 1 | 0 | 1.248870  | 1.659058  | -4.156348 |
| 71 | 1 | 0 | -0.404385 | 1.865045  | -3.552223 |
| 72 | 1 | 0 | 0.191279  | 2.889494  | -4.866773 |
| 73 | 6 | 0 | 2.159190  | 4.199478  | -3.572842 |
| 74 | 1 | 0 | 2.553626  | 5.001028  | -2.937791 |
| 75 | 1 | 0 | 2.987419  | 3.517543  | -3.806420 |
| 76 | 1 | 0 | 1.832941  | 4.660611  | -4.512493 |
| 77 | 6 | 0 | -0.150702 | 4.437705  | -2.596036 |
| 78 | 1 | 0 | 0.182862  | 5.242746  | -1.930623 |

|     |    |   |           |           |           |
|-----|----|---|-----------|-----------|-----------|
| 79  | 1  | 0 | -0.510036 | 4.909465  | -3.518688 |
| 80  | 1  | 0 | -1.003592 | 3.940119  | -2.127370 |
| 81  | 8  | 0 | 1.358725  | -0.663647 | -2.662882 |
| 82  | 8  | 0 | 1.481039  | -0.611839 | 0.028082  |
| 83  | 6  | 0 | 2.443925  | -0.879989 | -2.135783 |
| 84  | 6  | 0 | 2.547957  | -0.924011 | -0.604134 |
| 85  | 8  | 0 | 3.574160  | -1.079758 | -2.774354 |
| 86  | 6  | 0 | 3.542814  | -1.027181 | -4.230270 |
| 87  | 1  | 0 | 4.562312  | -1.252731 | -4.538362 |
| 88  | 1  | 0 | 2.844540  | -1.774238 | -4.611764 |
| 89  | 1  | 0 | 3.250908  | -0.027236 | -4.555968 |
| 90  | 6  | 0 | 3.832390  | -0.323319 | 0.007364  |
| 91  | 9  | 0 | 4.963244  | -0.911369 | -0.399370 |
| 92  | 9  | 0 | 3.783117  | -0.367872 | 1.347290  |
| 93  | 9  | 0 | 3.904412  | 0.980970  | -0.355146 |
| 94  | 6  | 0 | 6.358338  | -3.500904 | 3.065319  |
| 95  | 6  | 0 | 5.047339  | -3.277270 | 2.664070  |
| 96  | 6  | 0 | 4.664727  | -3.440086 | 1.309704  |
| 97  | 6  | 0 | 5.651075  | -3.862193 | 0.383731  |
| 98  | 6  | 0 | 6.957327  | -4.097276 | 0.793404  |
| 99  | 6  | 0 | 7.317232  | -3.911940 | 2.132693  |
| 100 | 1  | 0 | 6.636061  | -3.356568 | 4.105086  |
| 101 | 1  | 0 | 4.320421  | -2.952933 | 3.399546  |
| 102 | 1  | 0 | 5.386680  | -4.041600 | -0.652249 |
| 103 | 1  | 0 | 7.695929  | -4.433271 | 0.071976  |
| 104 | 1  | 0 | 8.340287  | -4.093724 | 2.449702  |
| 105 | 6  | 0 | 3.287611  | -3.206610 | 0.896557  |
| 106 | 6  | 0 | 2.207360  | -3.161534 | 1.934107  |
| 107 | 1  | 0 | 2.213605  | -4.078718 | 2.535274  |
| 108 | 1  | 0 | 2.370782  | -2.326284 | 2.626665  |
| 109 | 1  | 0 | 1.223161  | -3.042299 | 1.482877  |
| 110 | 6  | 0 | 2.930228  | -2.985875 | -0.443509 |
| 111 | 1  | 0 | 1.908688  | -3.225919 | -0.721822 |
| 112 | 1  | 0 | 3.669764  | -3.121357 | -1.224665 |
| 113 | 8  | 0 | -1.787652 | 0.631345  | -2.200528 |
| 114 | 8  | 0 | -3.853941 | -0.043757 | -3.382913 |
| 115 | 8  | 0 | -3.890858 | 0.184337  | -0.874337 |
| 116 | 16 | 0 | -3.316328 | 0.579040  | -2.166989 |
| 117 | 6  | 0 | -3.714863 | 2.388532  | -2.333804 |
| 118 | 9  | 0 | -5.041768 | 2.549186  | -2.375728 |
| 119 | 9  | 0 | -3.233877 | 3.068219  | -1.281275 |
| 120 | 9  | 0 | -3.180219 | 2.888127  | -3.452776 |

---

**M1<sub>endo</sub>-DCE**

Total energy= -3328.09224160

Sum of electronic and zero-point Energies= -3327.265500

Sum of electronic and thermal Energies= -3327.211087

Sum of electronic and thermal Enthalpies= -3327.210143

Sum of electronic and thermal Free Energies= -3327.358229

---

| Center<br>Number | Atomic<br>Number | Atomic<br>Type | Coordinates (Angstroms) |           |           |
|------------------|------------------|----------------|-------------------------|-----------|-----------|
|                  |                  |                | X                       | Y         | Z         |
| 1                | 45               | 0              | -0.150245               | -0.870755 | 0.738427  |
| 2                | 6                | 0              | -3.475327               | -0.561219 | 0.901172  |
| 3                | 1                | 0              | -3.567192               | -1.393214 | 0.192271  |
| 4                | 7                | 0              | -3.334768               | 1.646520  | 0.003482  |
| 5                | 6                | 0              | -2.103870               | 1.180120  | 0.269813  |
| 6                | 6                | 0              | -3.725721               | 2.914729  | -0.538668 |
| 7                | 7                | 0              | -2.083993               | -0.037625 | 0.800177  |
| 8                | 6                | 0              | -4.337512               | 0.639744  | 0.405619  |
| 9                | 1                | 0              | -4.975249               | 1.060531  | 1.187788  |
| 10               | 7                | 0              | 1.912785                | -1.058716 | 0.459842  |
| 11               | 6                | 0              | 4.231343                | -1.414887 | 0.193187  |
| 12               | 1                | 0              | 4.481697                | -1.913389 | -0.750575 |
| 13               | 7                | 0              | 3.820663                | -0.017481 | -0.087689 |
| 14               | 6                | 0              | 2.972580                | -2.010743 | 0.875080  |
| 15               | 1                | 0              | 3.086822                | -1.909730 | 1.964837  |
| 16               | 6                | 0              | 5.487633                | 1.776773  | -0.116582 |
| 17               | 1                | 0              | 5.436493                | 1.818974  | 0.967619  |
| 18               | 6                | 0              | 1.582580                | 1.204673  | -0.219800 |
| 19               | 6                | 0              | 0.821617                | 3.420109  | -0.830804 |
| 20               | 1                | 0              | 1.046438                | 4.417058  | -1.195892 |
| 21               | 6                | 0              | 4.683199                | 0.872786  | -0.812816 |
| 22               | 6                | 0              | -3.910349               | 3.048137  | -1.919753 |
| 23               | 1                | 0              | -3.720207               | 2.200546  | -2.572362 |
| 24               | 6                | 0              | 4.749092                | 0.806056  | -2.210205 |
| 25               | 1                | 0              | 4.131512                | 0.092176  | -2.748265 |
| 26               | 6                | 0              | -3.976764               | 3.996593  | 0.309117  |
| 27               | 1                | 0              | -3.840477               | 3.885998  | 1.381262  |
| 28               | 6                | 0              | 0.259192                | 0.921841  | 0.129078  |
| 29               | 6                | 0              | 1.863261                | 2.494770  | -0.701031 |
| 30               | 1                | 0              | 2.872283                | 2.782344  | -0.971766 |
| 31               | 6                | 0              | -0.503609               | 3.094034  | -0.522729 |
| 32               | 1                | 0              | -1.282744               | 3.833708  | -0.661505 |
| 33               | 6                | 0              | -0.803909               | 1.808420  | -0.039090 |
| 34               | 6                | 0              | 5.606595                | 1.658495  | -2.901953 |

---



|    |   |   |           |           |           |
|----|---|---|-----------|-----------|-----------|
| 35 | 1 | 0 | 5.649122  | 1.606553  | -3.987243 |
| 36 | 6 | 0 | 2.476387  | 0.053139  | 0.011301  |
| 37 | 6 | 0 | -4.396572 | 5.213569  | -0.230978 |
| 38 | 1 | 0 | -4.584830 | 6.053504  | 0.432601  |
| 39 | 6 | 0 | -4.331116 | 4.267921  | -2.445530 |
| 40 | 1 | 0 | -4.469149 | 4.367236  | -3.519395 |
| 41 | 6 | 0 | 6.416373  | 2.583157  | -2.221644 |
| 42 | 6 | 0 | -4.582170 | 5.370158  | -1.611928 |
| 43 | 6 | 0 | 6.342589  | 2.625933  | -0.822371 |
| 44 | 1 | 0 | 6.960844  | 3.333528  | -0.276113 |
| 45 | 6 | 0 | 7.347432  | 3.493700  | -2.984630 |
| 46 | 1 | 0 | 6.822609  | 4.009712  | -3.797479 |
| 47 | 1 | 0 | 8.166557  | 2.924994  | -3.443457 |
| 48 | 1 | 0 | 7.791444  | 4.250504  | -2.330697 |
| 49 | 6 | 0 | -5.056060 | 6.679615  | -2.193333 |
| 50 | 1 | 0 | -5.030522 | 7.480818  | -1.448349 |
| 51 | 1 | 0 | -6.088063 | 6.597231  | -2.558796 |
| 52 | 1 | 0 | -4.438930 | 6.984393  | -3.046742 |
| 53 | 1 | 0 | 5.108505  | -1.426666 | 0.841777  |
| 54 | 1 | 0 | -4.967693 | 0.382813  | -0.449966 |
| 55 | 6 | 0 | -3.890639 | -1.111360 | 2.300698  |
| 56 | 6 | 0 | 2.671846  | -3.505782 | 0.598906  |
| 57 | 6 | 0 | 3.892541  | -4.327781 | 1.060575  |
| 58 | 1 | 0 | 3.687861  | -5.399354 | 0.955697  |
| 59 | 1 | 0 | 4.784653  | -4.101961 | 0.464503  |
| 60 | 1 | 0 | 4.129597  | -4.133982 | 2.114222  |
| 61 | 6 | 0 | 1.448831  | -3.921295 | 1.440796  |
| 62 | 1 | 0 | 1.635057  | -3.769385 | 2.511270  |
| 63 | 1 | 0 | 0.550383  | -3.347803 | 1.171422  |
| 64 | 1 | 0 | 1.218230  | -4.981947 | 1.287086  |
| 65 | 6 | 0 | 2.397087  | -3.781632 | -0.888805 |
| 66 | 1 | 0 | 1.540261  | -3.204358 | -1.252638 |
| 67 | 1 | 0 | 3.258072  | -3.537855 | -1.521941 |
| 68 | 1 | 0 | 2.174373  | -4.844736 | -1.037120 |
| 69 | 6 | 0 | -3.045644 | -2.350783 | 2.647008  |
| 70 | 1 | 0 | -3.188739 | -3.151751 | 1.913752  |
| 71 | 1 | 0 | -1.975279 | -2.121888 | 2.686032  |
| 72 | 1 | 0 | -3.332744 | -2.740074 | 3.630817  |
| 73 | 6 | 0 | -5.366596 | -1.556259 | 2.213815  |
| 74 | 1 | 0 | -6.045055 | -0.714028 | 2.037716  |
| 75 | 1 | 0 | -5.516748 | -2.287239 | 1.409236  |
| 76 | 1 | 0 | -5.670324 | -2.029978 | 3.154394  |
| 77 | 6 | 0 | -3.735280 | -0.052822 | 3.406839  |
| 78 | 1 | 0 | -4.355423 | 0.832362  | 3.224278  |

|     |    |   |           |           |           |
|-----|----|---|-----------|-----------|-----------|
| 79  | 1  | 0 | -4.045308 | -0.472595 | 4.370736  |
| 80  | 1  | 0 | -2.696632 | 0.279618  | 3.508315  |
| 81  | 8  | 0 | -0.424109 | -1.259962 | -1.300446 |
| 82  | 8  | 0 | -1.702606 | -3.489610 | -0.206100 |
| 83  | 6  | 0 | -0.981012 | -2.113372 | -1.997831 |
| 84  | 6  | 0 | -1.670875 | -3.346236 | -1.399136 |
| 85  | 8  | 0 | -1.034977 | -2.063920 | -3.292765 |
| 86  | 6  | 0 | -0.410319 | -0.934019 | -3.984443 |
| 87  | 1  | 0 | -0.582797 | -1.131574 | -5.040025 |
| 88  | 1  | 0 | -0.897418 | -0.009943 | -3.668369 |
| 89  | 1  | 0 | 0.655440  | -0.918194 | -3.751574 |
| 90  | 6  | 0 | -2.306123 | -4.382617 | -2.360348 |
| 91  | 9  | 0 | -3.260331 | -3.796990 | -3.098928 |
| 92  | 9  | 0 | -2.846269 | -5.375005 | -1.656152 |
| 93  | 9  | 0 | -1.366205 | -4.882150 | -3.175962 |
| 94  | 6  | 0 | 1.551669  | 1.944158  | 3.601805  |
| 95  | 17 | 0 | 0.107343  | -0.345216 | 3.085856  |
| 96  | 17 | 0 | 3.140240  | 2.654608  | 4.125214  |
| 97  | 1  | 0 | 1.903081  | 0.014322  | 4.572631  |
| 98  | 1  | 0 | 2.461333  | 0.092064  | 2.867855  |
| 99  | 1  | 0 | 0.801382  | 2.267666  | 4.323253  |
| 100 | 1  | 0 | 1.331054  | 2.344620  | 2.612835  |
| 101 | 6  | 0 | 1.721708  | 0.438678  | 3.584910  |

---

**M1<sub>exo</sub>-DCE**

Total energy= -3328.09014911

Sum of electronic and zero-point Energies= -3327.263070

Sum of electronic and thermal Energies= -3327.208678

Sum of electronic and thermal Enthalpies= -3327.207733

Sum of electronic and thermal Free Energies= -3327.354267

---

| Center<br>Number | Atomic<br>Number | Atomic<br>Type | Coordinates (Angstroms) |           |           |
|------------------|------------------|----------------|-------------------------|-----------|-----------|
|                  |                  |                | X                       | Y         | Z         |
| 1                | 45               | 0              | -0.115035               | -0.960889 | 0.707897  |
| 2                | 6                | 0              | -3.466076               | -0.932449 | 0.777483  |
| 3                | 1                | 0              | -3.489373               | -1.773553 | 0.073192  |
| 4                | 7                | 0              | -3.496868               | 1.270283  | -0.145441 |
| 5                | 6                | 0              | -2.233447               | 0.903448  | 0.126240  |
| 6                | 6                | 0              | -3.990079               | 2.560913  | -0.529707 |
| 7                | 7                | 0              | -2.121085               | -0.300504 | 0.677409  |
| 8                | 6                | 0              | -4.418217               | 0.192505  | 0.271040  |

|    |   |   |           |           |           |
|----|---|---|-----------|-----------|-----------|
| 9  | 1 | 0 | -5.082231 | 0.571344  | 1.052539  |
| 10 | 7 | 0 | 1.962151  | -0.970097 | 0.488760  |
| 11 | 6 | 0 | 4.315644  | -1.108874 | 0.335976  |
| 12 | 1 | 0 | 4.668857  | -1.638905 | -0.555848 |
| 13 | 7 | 0 | 3.780247  | 0.214570  | -0.067142 |
| 14 | 6 | 0 | 3.088985  | -1.790185 | 0.998136  |
| 15 | 1 | 0 | 3.140764  | -1.624760 | 2.084757  |
| 16 | 6 | 0 | 5.332831  | 2.105546  | -0.062175 |
| 17 | 1 | 0 | 5.259221  | 2.136375  | 1.021133  |
| 18 | 6 | 0 | 1.447119  | 1.209022  | -0.338689 |
| 19 | 6 | 0 | 0.506268  | 3.304649  | -1.100689 |
| 20 | 1 | 0 | 0.647939  | 4.289207  | -1.534576 |
| 21 | 6 | 0 | 4.594007  | 1.158770  | -0.779075 |
| 22 | 6 | 0 | -4.111043 | 3.580479  | 0.422103  |
| 23 | 1 | 0 | -3.805616 | 3.400514  | 1.448967  |
| 24 | 6 | 0 | 4.693142  | 1.101284  | -2.172550 |
| 25 | 1 | 0 | 4.134043  | 0.353381  | -2.727718 |
| 26 | 6 | 0 | -4.401039 | 2.779378  | -1.846728 |
| 27 | 1 | 0 | -4.312683 | 1.981635  | -2.578831 |
| 28 | 6 | 0 | 0.147264  | 0.830173  | 0.006300  |
| 29 | 6 | 0 | 1.621961  | 2.485557  | -0.898907 |
| 30 | 1 | 0 | 2.606028  | 2.840722  | -1.180232 |
| 31 | 6 | 0 | -0.788659 | 2.887533  | -0.776531 |
| 32 | 1 | 0 | -1.626192 | 3.545394  | -0.972068 |
| 33 | 6 | 0 | -0.984442 | 1.616236  | -0.208839 |
| 34 | 6 | 0 | 5.516785  | 2.006361  | -2.843372 |
| 35 | 1 | 0 | 5.588324  | 1.958386  | -3.926914 |
| 36 | 6 | 0 | 2.434735  | 0.160728  | -0.018326 |
| 37 | 6 | 0 | -4.914631 | 4.024828  | -2.212210 |
| 38 | 1 | 0 | -5.228430 | 4.190689  | -3.239510 |
| 39 | 6 | 0 | -4.622611 | 4.819835  | 0.042827  |
| 40 | 1 | 0 | -4.709782 | 5.609736  | 0.784982  |
| 41 | 6 | 0 | 6.257404  | 2.970805  | -2.144832 |
| 42 | 6 | 0 | -5.031282 | 5.064458  | -1.278697 |
| 43 | 6 | 0 | 6.153559  | 3.001741  | -0.744679 |
| 44 | 1 | 0 | 6.723026  | 3.737215  | -0.181966 |
| 45 | 6 | 0 | 7.133206  | 3.960557  | -2.873850 |
| 46 | 1 | 0 | 6.663110  | 4.952382  | -2.908112 |
| 47 | 1 | 0 | 7.317746  | 3.646858  | -3.906101 |
| 48 | 1 | 0 | 8.100577  | 4.081312  | -2.373255 |
| 49 | 6 | 0 | -5.566972 | 6.417633  | -1.678191 |
| 50 | 1 | 0 | -5.991921 | 6.397887  | -2.686364 |
| 51 | 1 | 0 | -4.772153 | 7.175034  | -1.665398 |
| 52 | 1 | 0 | -6.344696 | 6.759412  | -0.985189 |

|    |    |   |           |           |           |
|----|----|---|-----------|-----------|-----------|
| 53 | 1  | 0 | 5.151583  | -0.983283 | 1.025675  |
| 54 | 1  | 0 | -5.030292 | -0.121508 | -0.578317 |
| 55 | 6  | 0 | -3.845329 | -1.509097 | 2.174813  |
| 56 | 6  | 0 | 2.947191  | -3.318794 | 0.786136  |
| 57 | 6  | 0 | 4.220933  | -3.992888 | 1.333793  |
| 58 | 1  | 0 | 4.126709  | -5.083229 | 1.275037  |
| 59 | 1  | 0 | 5.111490  | -3.707915 | 0.761041  |
| 60 | 1  | 0 | 4.394267  | -3.729119 | 2.384581  |
| 61 | 6  | 0 | 1.734454  | -3.810783 | 1.599867  |
| 62 | 1  | 0 | 1.847582  | -3.571530 | 2.664865  |
| 63 | 1  | 0 | 0.796205  | -3.361919 | 1.246044  |
| 64 | 1  | 0 | 1.626105  | -4.898018 | 1.510414  |
| 65 | 6  | 0 | 2.764686  | -3.692879 | -0.694343 |
| 66 | 1  | 0 | 1.872191  | -3.224517 | -1.121693 |
| 67 | 1  | 0 | 3.624646  | -3.399356 | -1.307042 |
| 68 | 1  | 0 | 2.651150  | -4.778842 | -0.791876 |
| 69 | 6  | 0 | -2.874929 | -2.643234 | 2.548974  |
| 70 | 1  | 0 | -2.843091 | -3.418081 | 1.775384  |
| 71 | 1  | 0 | -1.854732 | -2.273927 | 2.701840  |
| 72 | 1  | 0 | -3.189237 | -3.115100 | 3.487420  |
| 73 | 6  | 0 | -5.262723 | -2.108646 | 2.058442  |
| 74 | 1  | 0 | -6.015040 | -1.350003 | 1.813523  |
| 75 | 1  | 0 | -5.304103 | -2.888630 | 1.287798  |
| 76 | 1  | 0 | -5.555896 | -2.566006 | 3.010271  |
| 77 | 6  | 0 | -3.830986 | -0.434773 | 3.276539  |
| 78 | 1  | 0 | -4.564488 | 0.359533  | 3.096547  |
| 79 | 1  | 0 | -4.078890 | -0.890351 | 4.242250  |
| 80 | 1  | 0 | -2.846804 | 0.035526  | 3.376225  |
| 81 | 8  | 0 | -1.294790 | -3.955239 | -0.249770 |
| 82 | 8  | 0 | -0.268904 | -1.518960 | -1.285782 |
| 83 | 6  | 0 | -1.488741 | -3.611315 | -1.394222 |
| 84 | 6  | 0 | -0.793833 | -2.375327 | -1.977456 |
| 85 | 8  | 0 | -2.255253 | -4.179143 | -2.300281 |
| 86 | 6  | 0 | -2.976569 | -5.380812 | -1.897490 |
| 87 | 1  | 0 | -3.522073 | -5.691468 | -2.786289 |
| 88 | 1  | 0 | -2.261769 | -6.145073 | -1.587227 |
| 89 | 1  | 0 | -3.659897 | -5.138177 | -1.081464 |
| 90 | 6  | 0 | -0.700908 | -2.186204 | -3.512170 |
| 91 | 9  | 0 | -0.209336 | -3.294406 | -4.075481 |
| 92 | 9  | 0 | 0.095314  | -1.156119 | -3.800746 |
| 93 | 9  | 0 | -1.924644 | -1.941943 | -3.997565 |
| 94 | 6  | 0 | 1.297918  | 1.972844  | 4.004771  |
| 95 | 17 | 0 | -0.017450 | -0.207311 | 2.998003  |
| 96 | 17 | 0 | 2.870067  | 2.685354  | 4.568008  |

|     |   |   |          |           |          |
|-----|---|---|----------|-----------|----------|
| 97  | 1 | 0 | 1.950964 | -0.092192 | 4.331182 |
| 98  | 1 | 0 | 2.250016 | 0.527831  | 2.669644 |
| 99  | 1 | 0 | 0.612992 | 1.991980  | 4.852687 |
| 100 | 1 | 0 | 0.925058 | 2.604929  | 3.199041 |
| 101 | 6 | 0 | 1.595977 | 0.562751  | 3.536466 |

---

**TS2R<sub>endo</sub>-DCE**

Imaginary frequency= -151.28

Total energy= -3677.05279038

Sum of electronic and zero-point Energies= -3676.063902

Sum of electronic and thermal Energies= -3676.000545

Sum of electronic and thermal Enthalpies= -3675.999601

Sum of electronic and thermal Free Energies= -3676.164774

---

| Center<br>Number | Atomic<br>Number | Atomic<br>Type | Coordinates (Angstroms) |           |           |
|------------------|------------------|----------------|-------------------------|-----------|-----------|
|                  |                  |                | X                       | Y         | Z         |
| 1                | 45               | 0              | 0.198267                | -0.279090 | 0.813565  |
| 2                | 6                | 0              | -1.556438               | 2.552121  | 1.308439  |
| 3                | 1                | 0              | -2.444252               | 2.044689  | 0.932659  |
| 4                | 7                | 0              | -0.033285               | 3.757657  | -0.079491 |
| 5                | 6                | 0              | 0.416641                | 2.505375  | 0.117926  |
| 6                | 6                | 0              | 0.601904                | 4.850618  | -0.752498 |
| 7                | 7                | 0              | -0.369653               | 1.756055  | 0.879047  |
| 8                | 6                | 0              | -1.358979               | 3.901637  | 0.554361  |
| 9                | 1                | 0              | -1.349150               | 4.769814  | 1.216466  |
| 10               | 7                | 0              | 1.338075                | -2.002758 | 0.447993  |
| 11               | 6                | 0              | 2.631682                | -3.982488 | 0.275932  |
| 12               | 1                | 0              | 2.311858                | -4.671328 | -0.514146 |
| 13               | 7                | 0              | 3.281124                | -2.802287 | -0.336264 |
| 14               | 6                | 0              | 1.444134                | -3.354960 | 1.052740  |
| 15               | 1                | 0              | 1.745004                | -3.216258 | 2.101839  |
| 16               | 6                | 0              | 5.719850                | -2.722825 | -0.509217 |
| 17               | 1                | 0              | 5.767164                | -2.447776 | 0.540622  |
| 18               | 6                | 0              | 2.642399                | -0.363270 | -0.696629 |
| 19               | 6                | 0              | 3.628050                | 1.564786  | -1.774997 |
| 20               | 1                | 0              | 4.407427                | 1.990340  | -2.398990 |
| 21               | 6                | 0              | 4.478000                | -2.922949 | -1.117128 |
| 22               | 6                | 0              | 0.205084                | 5.194418  | -2.050140 |
| 23               | 1                | 0              | -0.561557               | 4.610647  | -2.551997 |
| 24               | 6                | 0              | 4.409445                | -3.285445 | -2.467769 |
| 25               | 1                | 0              | 3.442478                | -3.448484 | -2.935702 |
| 26               | 6                | 0              | 1.582200                | 5.603627  | -0.099798 |

|    |   |   |            |            |            |
|----|---|---|------------|------------|------------|
| 27 | 1 | 0 | 1. 877269  | 5. 342417  | 0. 912492  |
| 28 | 6 | 0 | 1. 663321  | 0. 496336  | -0. 189617 |
| 29 | 6 | 0 | 3. 648725  | 0. 193236  | -1. 503487 |
| 30 | 1 | 0 | 4. 435290  | -0. 423838 | -1. 920938 |
| 31 | 6 | 0 | 2. 626543  | 2. 403233  | -1. 274099 |
| 32 | 1 | 0 | 2. 641217  | 3. 457375  | -1. 521359 |
| 33 | 6 | 0 | 1. 612883  | 1. 864352  | -0. 463088 |
| 34 | 6 | 0 | 5. 584341  | -3. 428924 | -3. 203630 |
| 35 | 1 | 0 | 5. 524760  | -3. 704908 | -4. 253585 |
| 36 | 6 | 0 | 2. 439865  | -1. 752160 | -0. 245379 |
| 37 | 6 | 0 | 2. 180763  | 6. 679447  | -0. 757571 |
| 38 | 1 | 0 | 2. 950324  | 7. 253583  | -0. 247838 |
| 39 | 6 | 0 | 0. 805724  | 6. 275390  | -2. 693017 |
| 40 | 1 | 0 | 0. 499025  | 6. 531692  | -3. 704222 |
| 41 | 6 | 0 | 6. 842398  | -3. 222885 | -2. 613376 |
| 42 | 6 | 0 | 1. 804532  | 7. 034038  | -2. 060948 |
| 43 | 6 | 0 | 6. 888813  | -2. 868510 | -1. 257840 |
| 44 | 1 | 0 | 7. 851245  | -2. 704299 | -0. 780217 |
| 45 | 6 | 0 | 8. 107290  | -3. 396570 | -3. 418067 |
| 46 | 1 | 0 | 8. 042088  | -2. 876430 | -4. 380856 |
| 47 | 1 | 0 | 8. 292114  | -4. 456207 | -3. 638203 |
| 48 | 1 | 0 | 8. 979282  | -3. 012380 | -2. 879652 |
| 49 | 6 | 0 | 2. 438682  | 8. 210380  | -2. 762534 |
| 50 | 1 | 0 | 3. 359297  | 8. 525295  | -2. 261202 |
| 51 | 1 | 0 | 1. 758482  | 9. 072266  | -2. 779299 |
| 52 | 1 | 0 | 2. 679200  | 7. 971956  | -3. 804936 |
| 53 | 1 | 0 | 3. 335181  | -4. 502028 | 0. 928980  |
| 54 | 1 | 0 | -2. 120679 | 4. 062846  | -0. 215270 |
| 55 | 6 | 0 | -1. 754562 | 2. 706924  | 2. 849404  |
| 56 | 6 | 0 | 0. 131709  | -4. 178030 | 1. 069159  |
| 57 | 6 | 0 | 0. 439537  | -5. 560141 | 1. 679182  |
| 58 | 1 | 0 | -0. 485468 | -6. 138197 | 1. 788997  |
| 59 | 1 | 0 | 1. 119786  | -6. 144722 | 1. 048655  |
| 60 | 1 | 0 | 0. 893720  | -5. 465694 | 2. 673622  |
| 61 | 6 | 0 | -0. 883719 | -3. 452741 | 1. 971685  |
| 62 | 1 | 0 | -0. 491052 | -3. 331545 | 2. 989521  |
| 63 | 1 | 0 | -1. 133714 | -2. 456576 | 1. 584492  |
| 64 | 1 | 0 | -1. 814896 | -4. 027393 | 2. 042991  |
| 65 | 6 | 0 | -0. 455571 | -4. 355069 | -0. 341673 |
| 66 | 1 | 0 | -0. 676039 | -3. 388779 | -0. 808061 |
| 67 | 1 | 0 | 0. 223461  | -4. 900811 | -1. 007097 |
| 68 | 1 | 0 | -1. 387768 | -4. 929642 | -0. 290289 |
| 69 | 6 | 0 | -2. 036787 | 1. 332124  | 3. 481932  |
| 70 | 1 | 0 | -2. 898778 | 0. 849716  | 3. 010355  |

|     |    |   |           |           |           |
|-----|----|---|-----------|-----------|-----------|
| 71  | 1  | 0 | -1.187623 | 0.648608  | 3.392554  |
| 72  | 1  | 0 | -2.247902 | 1.446425  | 4.552155  |
| 73  | 6  | 0 | -3.011289 | 3.577583  | 3.071892  |
| 74  | 1  | 0 | -2.883929 | 4.602377  | 2.705874  |
| 75  | 1  | 0 | -3.887300 | 3.146067  | 2.571039  |
| 76  | 1  | 0 | -3.236698 | 3.639722  | 4.142970  |
| 77  | 6  | 0 | -0.543631 | 3.366744  | 3.531458  |
| 78  | 1  | 0 | -0.349846 | 4.373891  | 3.143069  |
| 79  | 1  | 0 | -0.726160 | 3.465423  | 4.608153  |
| 80  | 1  | 0 | 0.368405  | 2.773821  | 3.403319  |
| 81  | 8  | 0 | -0.674481 | -0.568217 | -1.040363 |
| 82  | 8  | 0 | -2.742895 | -0.490567 | 0.765349  |
| 83  | 6  | 0 | -1.852634 | -0.638472 | -1.427056 |
| 84  | 6  | 0 | -3.055471 | -0.571167 | -0.457986 |
| 85  | 8  | 0 | -2.138971 | -0.747332 | -2.695014 |
| 86  | 6  | 0 | -1.046103 | -0.757368 | -3.663950 |
| 87  | 1  | 0 | -1.536027 | -0.851193 | -4.631072 |
| 88  | 1  | 0 | -0.489574 | 0.178841  | -3.595311 |
| 89  | 1  | 0 | -0.395837 | -1.611788 | -3.469703 |
| 90  | 6  | 0 | -4.098591 | 0.476887  | -0.954969 |
| 91  | 9  | 0 | -3.456791 | 1.658377  | -1.171295 |
| 92  | 9  | 0 | -5.026238 | 0.683623  | -0.011770 |
| 93  | 9  | 0 | -4.723656 | 0.163497  | -2.102044 |
| 94  | 6  | 0 | -8.685068 | -1.459273 | -0.155537 |
| 95  | 6  | 0 | -7.403467 | -1.710736 | 0.318157  |
| 96  | 6  | 0 | -6.375517 | -2.129573 | -0.561995 |
| 97  | 6  | 0 | -6.696344 | -2.303819 | -1.931471 |
| 98  | 6  | 0 | -7.986432 | -2.075051 | -2.393597 |
| 99  | 6  | 0 | -8.982661 | -1.646327 | -1.509907 |
| 100 | 1  | 0 | -9.455482 | -1.119366 | 0.529904  |
| 101 | 1  | 0 | -7.189340 | -1.545595 | 1.367822  |
| 102 | 1  | 0 | -5.944496 | -2.662620 | -2.625661 |
| 103 | 1  | 0 | -8.219634 | -2.234509 | -3.442039 |
| 104 | 1  | 0 | -9.989877 | -1.464642 | -1.874112 |
| 105 | 6  | 0 | -5.027486 | -2.377074 | -0.073359 |
| 106 | 6  | 0 | -4.745538 | -2.627646 | 1.362250  |
| 107 | 1  | 0 | -4.120344 | -1.782299 | 1.715592  |
| 108 | 1  | 0 | -5.626883 | -2.736490 | 1.992590  |
| 109 | 1  | 0 | -4.113697 | -3.516451 | 1.470285  |
| 110 | 6  | 0 | -3.890112 | -2.278279 | -0.910461 |
| 111 | 1  | 0 | -3.038115 | -2.886218 | -0.613139 |
| 112 | 1  | 0 | -4.039039 | -2.219281 | -1.982703 |
| 113 | 6  | 0 | 3.963802  | 0.636565  | 3.320050  |
| 114 | 17 | 0 | 1.319732  | 0.014454  | 2.978057  |

|     |    |   |          |           |          |
|-----|----|---|----------|-----------|----------|
| 115 | 17 | 0 | 5.675961 | 0.037012  | 3.428630 |
| 116 | 1  | 0 | 3.087406 | -1.285659 | 3.885065 |
| 117 | 1  | 0 | 3.291592 | -1.056863 | 2.115201 |
| 118 | 1  | 0 | 3.733884 | 1.122646  | 4.268500 |
| 119 | 1  | 0 | 3.925490 | 1.357683  | 2.503426 |
| 120 | 6  | 0 | 3.082580 | -0.569895 | 3.063466 |

---

**TS2S<sub>endo</sub>-DCE**

Imaginary frequency= -163.92

Total energy= -3677.04899556

Sum of electronic and zero-point Energies= -3676.059780

Sum of electronic and thermal Energies= -3675.996591

Sum of electronic and thermal Enthalpies= -3675.995647

Sum of electronic and thermal Free Energies= -3676.159670

---

| Center<br>Number | Atomic<br>Number | Atomic<br>Type | Coordinates (Angstroms) |           |           |
|------------------|------------------|----------------|-------------------------|-----------|-----------|
|                  |                  |                | X                       | Y         | Z         |
| 1                | 45               | 0              | 0.270552                | -0.210171 | 0.923801  |
| 2                | 6                | 0              | -1.773389               | 2.419490  | 1.415666  |
| 3                | 1                | 0              | -2.616037               | 1.808296  | 1.078715  |
| 4                | 7                | 0              | -0.446016               | 3.745862  | -0.062648 |
| 5                | 6                | 0              | 0.149583                | 2.560460  | 0.152055  |
| 6                | 6                | 0              | 0.004765                | 4.854821  | -0.850781 |
| 7                | 7                | 0              | -0.519795               | 1.750566  | 0.962206  |
| 8                | 6                | 0              | -1.746745               | 3.769275  | 0.634076  |
| 9                | 1                | 0              | -1.789647               | 4.643264  | 1.287125  |
| 10               | 7                | 0              | 1.586591                | -1.825680 | 0.540517  |
| 11               | 6                | 0              | 3.176741                | -3.596937 | 0.447917  |
| 12               | 1                | 0              | 3.011962                | -4.382903 | -0.295965 |
| 13               | 7                | 0              | 3.625424                | -2.367943 | -0.239031 |
| 14               | 6                | 0              | 1.869056                | -3.152072 | 1.159684  |
| 15               | 1                | 0              | 2.085744                | -2.971459 | 2.222325  |
| 16               | 6                | 0              | 6.037807                | -2.240824 | -0.632305 |
| 17               | 1                | 0              | 6.182777                | -2.053870 | 0.427911  |
| 18               | 6                | 0              | 2.665595                | -0.055824 | -0.656741 |
| 19               | 6                | 0              | 3.424897                | 1.958588  | -1.764216 |
| 20               | 1                | 0              | 4.150830                | 2.460845  | -2.395510 |
| 21               | 6                | 0              | 4.742813                | -2.400844 | -1.137588 |
| 22               | 6                | 0              | -0.375684               | 4.956055  | -2.191570 |
| 23               | 1                | 0              | -0.988913               | 4.178777  | -2.638950 |
| 24               | 6                | 0              | 4.549389                | -2.650441 | -2.499320 |
| 25               | 1                | 0              | 3.544032                | -2.790584 | -2.886660 |



|    |   |   |           |           |           |
|----|---|---|-----------|-----------|-----------|
| 26 | 6 | 0 | 0.782623  | 5.861138  | -0.265805 |
| 27 | 1 | 0 | 1.063794  | 5.784599  | 0.780798  |
| 28 | 6 | 0 | 1.601803  | 0.695749  | -0.153112 |
| 29 | 6 | 0 | 3.600428  | 0.602238  | -1.474521 |
| 30 | 1 | 0 | 4.452294  | 0.074190  | -1.885035 |
| 31 | 6 | 0 | 2.335795  | 2.684182  | -1.271425 |
| 32 | 1 | 0 | 2.231653  | 3.730371  | -1.530848 |
| 33 | 6 | 0 | 1.394313  | 2.044280  | -0.447505 |
| 34 | 6 | 0 | 5.651480  | -2.714813 | -3.353612 |
| 35 | 1 | 0 | 5.494186  | -2.904089 | -4.412314 |
| 36 | 6 | 0 | 2.640203  | -1.448636 | -0.172022 |
| 37 | 6 | 0 | 1.193999  | 6.949327  | -1.033168 |
| 38 | 1 | 0 | 1.802492  | 7.725046  | -0.574768 |
| 39 | 6 | 0 | 0.039931  | 6.053144  | -2.947885 |
| 40 | 1 | 0 | -0.256703 | 6.124327  | -3.991182 |
| 41 | 6 | 0 | 6.956425  | -2.547608 | -2.869081 |
| 42 | 6 | 0 | 0.833585  | 7.063181  | -2.386062 |
| 43 | 6 | 0 | 7.129656  | -2.314169 | -1.494869 |
| 44 | 1 | 0 | 8.133111  | -2.185206 | -1.096718 |
| 45 | 6 | 0 | 8.147695  | -2.609594 | -3.793492 |
| 46 | 1 | 0 | 8.650837  | -1.636080 | -3.855893 |
| 47 | 1 | 0 | 7.852875  | -2.899673 | -4.806738 |
| 48 | 1 | 0 | 8.891977  | -3.331038 | -3.435443 |
| 49 | 6 | 0 | 1.299667  | 8.239098  | -3.209212 |
| 50 | 1 | 0 | 1.113143  | 9.187003  | -2.691019 |
| 51 | 1 | 0 | 0.793105  | 8.274266  | -4.178638 |
| 52 | 1 | 0 | 2.379780  | 8.185456  | -3.398585 |
| 53 | 1 | 0 | 3.942375  | -3.938517 | 1.147491  |
| 54 | 1 | 0 | -2.554787 | 3.850059  | -0.100264 |
| 55 | 6 | 0 | -1.929348 | 2.586662  | 2.962648  |
| 56 | 6 | 0 | 0.717012  | -4.190701 | 1.106979  |
| 57 | 6 | 0 | 1.232207  | -5.500625 | 1.738988  |
| 58 | 1 | 0 | 0.420760  | -6.235925 | 1.787139  |
| 59 | 1 | 0 | 2.046456  | -5.948973 | 1.157877  |
| 60 | 1 | 0 | 1.595180  | -5.335672 | 2.761238  |
| 61 | 6 | 0 | -0.459232 | -3.676007 | 1.954773  |
| 62 | 1 | 0 | -0.147725 | -3.498598 | 2.992513  |
| 63 | 1 | 0 | -0.876473 | -2.744307 | 1.559001  |
| 64 | 1 | 0 | -1.270403 | -4.412774 | 1.972104  |
| 65 | 6 | 0 | 0.253852  | -4.462969 | -0.334465 |
| 66 | 1 | 0 | -0.103798 | -3.550714 | -0.822700 |
| 67 | 1 | 0 | 1.055534  | -4.883788 | -0.952399 |
| 68 | 1 | 0 | -0.567548 | -5.187158 | -0.333156 |
| 69 | 6 | 0 | -2.057526 | 1.202304  | 3.625093  |

|     |   |   |           |           |           |
|-----|---|---|-----------|-----------|-----------|
| 70  | 1 | 0 | -2.936801 | 0.663706  | 3.256021  |
| 71  | 1 | 0 | -1.185253 | 0.569109  | 3.438426  |
| 72  | 1 | 0 | -2.158223 | 1.310326  | 4.711551  |
| 73  | 6 | 0 | -3.242519 | 3.354571  | 3.233995  |
| 74  | 1 | 0 | -3.206635 | 4.389332  | 2.875926  |
| 75  | 1 | 0 | -4.102061 | 2.861778  | 2.763409  |
| 76  | 1 | 0 | -3.432392 | 3.390457  | 4.312974  |
| 77  | 6 | 0 | -0.755774 | 3.363767  | 3.584955  |
| 78  | 1 | 0 | -0.663271 | 4.374704  | 3.170279  |
| 79  | 1 | 0 | -0.912075 | 3.472101  | 4.664716  |
| 80  | 1 | 0 | 0.199508  | 2.849860  | 3.439509  |
| 81  | 8 | 0 | -0.672386 | -0.580940 | -0.880459 |
| 82  | 8 | 0 | -2.653060 | -1.136706 | 0.982537  |
| 83  | 6 | 0 | -1.759455 | -1.078024 | -1.219648 |
| 84  | 6 | 0 | -2.907221 | -1.364024 | -0.225660 |
| 85  | 8 | 0 | -1.993008 | -1.393711 | -2.463803 |
| 86  | 6 | 0 | -0.945605 | -1.172592 | -3.456724 |
| 87  | 1 | 0 | -1.366525 | -1.545830 | -4.388209 |
| 88  | 1 | 0 | -0.731126 | -0.104605 | -3.524873 |
| 89  | 1 | 0 | -0.050585 | -1.731311 | -3.178804 |
| 90  | 6 | 0 | -3.664204 | -2.692560 | -0.516209 |
| 91  | 9 | 0 | -4.250887 | -2.767715 | -1.722347 |
| 92  | 9 | 0 | -4.604897 | -2.888323 | 0.420086  |
| 93  | 9 | 0 | -2.783171 | -3.718064 | -0.436552 |
| 94  | 6 | 0 | -8.609371 | -2.006621 | -0.479490 |
| 95  | 6 | 0 | -7.487811 | -1.372984 | 0.042829  |
| 96  | 6 | 0 | -6.538240 | -0.765277 | -0.812109 |
| 97  | 6 | 0 | -6.772601 | -0.799963 | -2.207567 |
| 98  | 6 | 0 | -7.908176 | -1.414097 | -2.722428 |
| 99  | 6 | 0 | -8.826247 | -2.024811 | -1.861515 |
| 100 | 1 | 0 | -9.317970 | -2.485300 | 0.189700  |
| 101 | 1 | 0 | -7.326320 | -1.381600 | 1.114811  |
| 102 | 1 | 0 | -6.085011 | -0.304727 | -2.884364 |
| 103 | 1 | 0 | -8.083103 | -1.413379 | -3.794122 |
| 104 | 1 | 0 | -9.711216 | -2.507783 | -2.266047 |
| 105 | 6 | 0 | -5.352088 | -0.111373 | -0.271249 |
| 106 | 6 | 0 | -5.304939 | 0.376883  | 1.134559  |
| 107 | 1 | 0 | -4.977575 | 1.422230  | 1.150257  |
| 108 | 1 | 0 | -6.247777 | 0.292864  | 1.673950  |
| 109 | 1 | 0 | -4.515057 | -0.190159 | 1.660378  |
| 110 | 6 | 0 | -4.163922 | 0.013256  | -1.010963 |
| 111 | 1 | 0 | -3.516076 | 0.843622  | -0.739387 |
| 112 | 1 | 0 | -4.171963 | -0.231164 | -2.067387 |
| 113 | 6 | 0 | 4.070252  | 1.035357  | 2.979107  |

|     |    |   |          |           |          |
|-----|----|---|----------|-----------|----------|
| 114 | 17 | 0 | 1.426009 | 0.284647  | 3.030859 |
| 115 | 17 | 0 | 5.799641 | 0.525844  | 3.208952 |
| 116 | 1  | 0 | 3.283740 | -0.615560 | 4.175271 |
| 117 | 1  | 0 | 3.388774 | -0.967700 | 2.420262 |
| 118 | 1  | 0 | 3.859126 | 1.801862  | 3.724705 |
| 119 | 1  | 0 | 3.985479 | 1.448390  | 1.974297 |
| 120 | 6  | 0 | 3.215428 | -0.200915 | 3.169547 |

---

**TS2R<sub>exo</sub>-DCE**

Imaginary frequency= -148.38

Total energy= -3677.05276312

Sum of electronic and zero-point Energies= -3676.062965

Sum of electronic and thermal Energies= -3675.999832

Sum of electronic and thermal Enthalpies= -3675.998888

Sum of electronic and thermal Free Energies= -3676.163263

---

| Center<br>Number | Atomic<br>Number | Atomic<br>Type | Coordinates (Angstroms) |           |           |
|------------------|------------------|----------------|-------------------------|-----------|-----------|
|                  |                  |                | X                       | Y         | Z         |
| 1                | 45               | 0              | -0.198317               | -0.229705 | -1.157834 |
| 2                | 6                | 0              | 2.226517                | 2.024455  | -1.863263 |
| 3                | 1                | 0              | 2.967476                | 1.220177  | -1.891554 |
| 4                | 7                | 0              | 1.600562                | 3.314145  | 0.048165  |
| 5                | 6                | 0              | 0.728721                | 2.301234  | -0.127344 |
| 6                | 6                | 0              | 1.454591                | 4.504980  | 0.825939  |
| 7                | 7                | 0              | 1.013498                | 1.508838  | -1.154505 |
| 8                | 6                | 0              | 2.716716                | 3.152609  | -0.908012 |
| 9                | 1                | 0              | 2.891529                | 4.100747  | -1.417176 |
| 10               | 7                | 0              | -1.790482               | -1.591022 | -0.654692 |
| 11               | 6                | 0              | -3.909834               | -2.706127 | -0.551511 |
| 12               | 1                | 0              | -4.003516               | -3.681468 | -0.066787 |
| 13               | 7                | 0              | -3.737655               | -1.667581 | 0.479777  |
| 14               | 6                | 0              | -2.619585               | -2.582675 | -1.414671 |
| 15               | 1                | 0              | -2.869800               | -2.113342 | -2.375205 |
| 16               | 6                | 0              | -5.850831               | -0.829670 | 1.385760  |
| 17               | 1                | 0              | -6.038513               | -0.328808 | 0.440448  |
| 18               | 6                | 0              | -2.035190               | 0.102714  | 1.036232  |
| 19               | 6                | 0              | -1.927214               | 1.929406  | 2.618488  |
| 20               | 1                | 0              | -2.291822               | 2.406305  | 3.522606  |
| 21               | 6                | 0              | -4.665315               | -1.549012 | 1.567061  |
| 22               | 6                | 0              | 0.391451                | 5.387241  | 0.590748  |
| 23               | 1                | 0              | -0.348392               | 5.153669  | -0.169035 |
| 24               | 6                | 0              | -4.423350               | -2.204682 | 2.778694  |

|    |   |   |           |           |           |
|----|---|---|-----------|-----------|-----------|
| 25 | 1 | 0 | -3.510822 | -2.779308 | 2.910679  |
| 26 | 6 | 0 | 2.424944  | 4.827234  | 1.779844  |
| 27 | 1 | 0 | 3.256591  | 4.151398  | 1.957103  |
| 28 | 6 | 0 | -0.993335 | 0.713889  | 0.338491  |
| 29 | 6 | 0 | -2.511852 | 0.730958  | 2.198752  |
| 30 | 1 | 0 | -3.316683 | 0.296655  | 2.778622  |
| 31 | 6 | 0 | -0.883855 | 2.528997  | 1.906790  |
| 32 | 1 | 0 | -0.452973 | 3.452858  | 2.271688  |
| 33 | 6 | 0 | -0.403629 | 1.918333  | 0.735706  |
| 34 | 6 | 0 | -5.359244 | -2.117060 | 3.810016  |
| 35 | 1 | 0 | -5.164460 | -2.628185 | 4.749565  |
| 36 | 6 | 0 | -2.521842 | -1.104414 | 0.343804  |
| 37 | 6 | 0 | 2.320771  | 6.017078  | 2.501428  |
| 38 | 1 | 0 | 3.081591  | 6.258441  | 3.239267  |
| 39 | 6 | 0 | 0.292530  | 6.564709  | 1.329067  |
| 40 | 1 | 0 | -0.537534 | 7.241167  | 1.140242  |
| 41 | 6 | 0 | -6.551426 | -1.395096 | 3.650600  |
| 42 | 6 | 0 | 1.253283  | 6.902399  | 2.295655  |
| 43 | 6 | 0 | -6.780503 | -0.756230 | 2.421734  |
| 44 | 1 | 0 | -7.699887 | -0.195484 | 2.272687  |
| 45 | 6 | 0 | -7.554281 | -1.289459 | 4.773557  |
| 46 | 1 | 0 | -7.440974 | -0.340154 | 5.314410  |
| 47 | 1 | 0 | -7.428553 | -2.098069 | 5.500677  |
| 48 | 1 | 0 | -8.582013 | -1.323578 | 4.395689  |
| 49 | 6 | 0 | 1.128318  | 8.178552  | 3.091082  |
| 50 | 1 | 0 | 2.056002  | 8.411250  | 3.623220  |
| 51 | 1 | 0 | 0.327255  | 8.102434  | 3.838413  |
| 52 | 1 | 0 | 0.882254  | 9.028778  | 2.444289  |
| 53 | 1 | 0 | -4.822822 | -2.517535 | -1.122030 |
| 54 | 1 | 0 | 3.629065  | 2.876504  | -0.369860 |
| 55 | 6 | 0 | 2.026816  | 2.501381  | -3.340622 |
| 56 | 6 | 0 | -1.982181 | -3.963529 | -1.749848 |
| 57 | 6 | 0 | -3.032207 | -4.763671 | -2.552184 |
| 58 | 1 | 0 | -2.619509 | -5.738491 | -2.836487 |
| 59 | 1 | 0 | -3.946020 | -4.950403 | -1.976370 |
| 60 | 1 | 0 | -3.313934 | -4.238963 | -3.474001 |
| 61 | 6 | 0 | -0.745179 | -3.775594 | -2.640972 |
| 62 | 1 | 0 | -0.949679 | -3.104434 | -3.484969 |
| 63 | 1 | 0 | 0.091834  | -3.369726 | -2.073702 |
| 64 | 1 | 0 | -0.425634 | -4.740992 | -3.051442 |
| 65 | 6 | 0 | -1.586787 | -4.748573 | -0.486033 |
| 66 | 1 | 0 | -0.921307 | -4.165670 | 0.157283  |
| 67 | 1 | 0 | -2.457284 | -5.048816 | 0.107820  |
| 68 | 1 | 0 | -1.058175 | -5.666809 | -0.767909 |

|     |   |   |           |           |           |
|-----|---|---|-----------|-----------|-----------|
| 69  | 6 | 0 | 1.636105  | 1.319193  | -4.244549 |
| 70  | 1 | 0 | 2.404639  | 0.539098  | -4.234123 |
| 71  | 1 | 0 | 0.692810  | 0.853760  | -3.950217 |
| 72  | 1 | 0 | 1.521738  | 1.664294  | -5.278877 |
| 73  | 6 | 0 | 3.389225  | 3.027087  | -3.848950 |
| 74  | 1 | 0 | 3.711661  | 3.937813  | -3.333573 |
| 75  | 1 | 0 | 4.177536  | 2.272423  | -3.731164 |
| 76  | 1 | 0 | 3.317483  | 3.266861  | -4.916009 |
| 77  | 6 | 0 | 0.974134  | 3.618482  | -3.451770 |
| 78  | 1 | 0 | 1.251458  | 4.506425  | -2.871678 |
| 79  | 1 | 0 | 0.873462  | 3.933844  | -4.496939 |
| 80  | 1 | 0 | -0.011455 | 3.284325  | -3.110843 |
| 81  | 8 | 0 | 1.511109  | -1.336543 | -2.470455 |
| 82  | 8 | 0 | 1.002167  | -1.259566 | 0.165631  |
| 83  | 6 | 0 | 2.301329  | -1.903052 | -1.721791 |
| 84  | 6 | 0 | 2.033942  | -1.888189 | -0.219392 |
| 85  | 8 | 0 | 3.357617  | -2.582375 | -2.091733 |
| 86  | 6 | 0 | 3.604343  | -2.723346 | -3.522833 |
| 87  | 1 | 0 | 4.511465  | -3.320853 | -3.589730 |
| 88  | 1 | 0 | 2.761781  | -3.237770 | -3.988380 |
| 89  | 1 | 0 | 3.752080  | -1.738994 | -3.970007 |
| 90  | 6 | 0 | 2.360670  | -3.158726 | 0.591394  |
| 91  | 9 | 0 | 1.550450  | -4.143864 | 0.140736  |
| 92  | 9 | 0 | 2.097356  | -2.970306 | 1.890885  |
| 93  | 9 | 0 | 3.619442  | -3.579138 | 0.454298  |
| 94  | 6 | 0 | 5.752876  | -3.089746 | 4.108504  |
| 95  | 6 | 0 | 4.810534  | -2.229472 | 3.554949  |
| 96  | 6 | 0 | 5.018278  | -1.655479 | 2.279317  |
| 97  | 6 | 0 | 6.218883  | -1.961579 | 1.594933  |
| 98  | 6 | 0 | 7.167626  | -2.803234 | 2.163249  |
| 99  | 6 | 0 | 6.935535  | -3.375510 | 3.418626  |
| 100 | 1 | 0 | 5.567273  | -3.538237 | 5.079972  |
| 101 | 1 | 0 | 3.892621  | -2.033922 | 4.097822  |
| 102 | 1 | 0 | 6.425638  | -1.503257 | 0.633654  |
| 103 | 1 | 0 | 8.091735  | -3.010284 | 1.631712  |
| 104 | 1 | 0 | 7.675624  | -4.037160 | 3.859637  |
| 105 | 6 | 0 | 4.021502  | -0.768465 | 1.678914  |
| 106 | 6 | 0 | 3.090872  | 0.028859  | 2.548138  |
| 107 | 1 | 0 | 3.249880  | -0.126728 | 3.614923  |
| 108 | 1 | 0 | 3.229970  | 1.096695  | 2.339833  |
| 109 | 1 | 0 | 2.046301  | -0.205116 | 2.305707  |
| 110 | 6 | 0 | 3.901009  | -0.635319 | 0.299843  |
| 111 | 1 | 0 | 3.373216  | 0.228538  | -0.088068 |
| 112 | 1 | 0 | 4.612924  | -1.111305 | -0.365207 |

|     |    |   |           |          |           |
|-----|----|---|-----------|----------|-----------|
| 113 | 6  | 0 | -3.848615 | 2.356401 | -2.141385 |
| 114 | 17 | 0 | -1.636040 | 0.891106 | -2.822134 |
| 115 | 17 | 0 | -5.645408 | 2.377883 | -1.873036 |
| 116 | 1  | 0 | -3.911347 | 0.576189 | -3.407249 |
| 117 | 1  | 0 | -3.642091 | 0.231518 | -1.667090 |
| 118 | 1  | 0 | -3.638072 | 3.044371 | -2.960092 |
| 119 | 1  | 0 | -3.379446 | 2.704977 | -1.221605 |
| 120 | 6  | 0 | -3.463125 | 0.930589 | -2.479224 |

---

### TS2S<sub>exo</sub>-DCE

Imaginary frequency= -139.10

Total energy= -3677.05573989

Sum of electronic and zero-point Energies= -3676.065844

Sum of electronic and thermal Energies= -3676.002668

Sum of electronic and thermal Enthalpies= -3676.001723

Sum of electronic and thermal Free Energies= -3676.165945

---

| Center<br>Number | Atomic<br>Number | Atomic<br>Type | Coordinates (Angstroms) |           |           |
|------------------|------------------|----------------|-------------------------|-----------|-----------|
|                  |                  |                | X                       | Y         | Z         |
| 1                | 45               | 0              | -0.174385               | 0.054489  | -1.183967 |
| 2                | 6                | 0              | 1.975931                | 2.589029  | -1.707208 |
| 3                | 1                | 0              | 2.768708                | 1.843782  | -1.820652 |
| 4                | 7                | 0              | 1.344750                | 3.552716  | 0.383367  |
| 5                | 6                | 0              | 0.523776                | 2.532836  | 0.086213  |
| 6                | 6                | 0              | 1.347560                | 4.408053  | 1.533497  |
| 7                | 7                | 0              | 0.799061                | 1.927349  | -1.065335 |
| 8                | 6                | 0              | 2.405826                | 3.637350  | -0.636757 |
| 9                | 1                | 0              | 2.450465                | 4.656093  | -1.025203 |
| 10               | 7                | 0              | -1.588390               | -1.529603 | -0.780531 |
| 11               | 6                | 0              | -3.606524               | -2.830372 | -0.798894 |
| 12               | 1                | 0              | -3.598936               | -3.851182 | -0.406760 |
| 13               | 7                | 0              | -3.526840               | -1.880190 | 0.321776  |
| 14               | 6                | 0              | -2.345075               | -2.497323 | -1.646404 |
| 15               | 1                | 0              | -2.647023               | -1.941876 | -2.543774 |
| 16               | 6                | 0              | -5.699130               | -1.310076 | 1.298054  |
| 17               | 1                | 0              | -5.935415               | -0.735194 | 0.407230  |
| 18               | 6                | 0              | -2.008827               | -0.008470 | 1.041801  |
| 19               | 6                | 0              | -2.088855               | 1.686434  | 2.766905  |
| 20               | 1                | 0              | -2.503658               | 2.052050  | 3.700842  |
| 21               | 6                | 0              | -4.460181               | -1.945558 | 1.408244  |
| 22               | 6                | 0              | 0.655719                | 5.621459  | 1.503590  |
| 23               | 1                | 0              | 0.090830                | 5.897853  | 0.617978  |

|    |   |   |           |           |           |
|----|---|---|-----------|-----------|-----------|
| 24 | 6 | 0 | -4.157796 | -2.696684 | 2.550956  |
| 25 | 1 | 0 | -3.200380 | -3.204673 | 2.625558  |
| 26 | 6 | 0 | 2.089264  | 4.051055  | 2.666129  |
| 27 | 1 | 0 | 2.633608  | 3.110921  | 2.678408  |
| 28 | 6 | 0 | -1.043097 | 0.766515  | 0.398747  |
| 29 | 6 | 0 | -2.541908 | 0.468609  | 2.252343  |
| 30 | 1 | 0 | -3.292168 | -0.093237 | 2.794632  |
| 31 | 6 | 0 | -1.108763 | 2.443560  | 2.116630  |
| 32 | 1 | 0 | -0.779204 | 3.377189  | 2.554973  |
| 33 | 6 | 0 | -0.563382 | 1.975360  | 0.910148  |
| 34 | 6 | 0 | -5.088274 | -2.788052 | 3.583841  |
| 35 | 1 | 0 | -4.844635 | -3.369084 | 4.470079  |
| 36 | 6 | 0 | -2.368239 | -1.197287 | 0.247039  |
| 37 | 6 | 0 | 2.117296  | 4.901755  | 3.768313  |
| 38 | 1 | 0 | 2.690074  | 4.617277  | 4.647917  |
| 39 | 6 | 0 | 0.689710  | 6.463355  | 2.617130  |
| 40 | 1 | 0 | 0.144831  | 7.403355  | 2.590936  |
| 41 | 6 | 0 | -6.336877 | -2.149995 | 3.495998  |
| 42 | 6 | 0 | 1.417635  | 6.120685  | 3.764170  |
| 43 | 6 | 0 | -6.625129 | -1.415263 | 2.337700  |
| 44 | 1 | 0 | -7.586138 | -0.915881 | 2.246687  |
| 45 | 6 | 0 | -7.334689 | -2.259371 | 4.622940  |
| 46 | 1 | 0 | -8.268526 | -1.742552 | 4.381366  |
| 47 | 1 | 0 | -6.936804 | -1.823259 | 5.548007  |
| 48 | 1 | 0 | -7.573109 | -3.307731 | 4.840928  |
| 49 | 6 | 0 | 1.462635  | 7.034689  | 4.964486  |
| 50 | 1 | 0 | 1.145478  | 6.509191  | 5.877279  |
| 51 | 1 | 0 | 0.808332  | 7.903989  | 4.827175  |
| 52 | 1 | 0 | 2.483869  | 7.401622  | 5.145017  |
| 53 | 1 | 0 | -4.539386 | -2.682819 | -1.349009 |
| 54 | 1 | 0 | 3.371334  | 3.398722  | -0.179473 |
| 55 | 6 | 0 | 1.725595  | 3.202670  | -3.123761 |
| 56 | 6 | 0 | -1.603543 | -3.771692 | -2.147737 |
| 57 | 6 | 0 | -2.603435 | -4.580275 | -3.003844 |
| 58 | 1 | 0 | -2.107342 | -5.466501 | -3.416221 |
| 59 | 1 | 0 | -3.466128 | -4.929682 | -2.425238 |
| 60 | 1 | 0 | -2.977657 | -3.985952 | -3.847013 |
| 61 | 6 | 0 | -0.423669 | -3.376819 | -3.047367 |
| 62 | 1 | 0 | -0.740861 | -2.708879 | -3.858177 |
| 63 | 1 | 0 | 0.358103  | -2.870304 | -2.481667 |
| 64 | 1 | 0 | 0.018261  | -4.270805 | -3.503873 |
| 65 | 6 | 0 | -1.092808 | -4.645082 | -0.988585 |
| 66 | 1 | 0 | -0.470886 | -4.067232 | -0.297657 |
| 67 | 1 | 0 | -1.907164 | -5.095179 | -0.409988 |

|     |   |   |           |           |           |
|-----|---|---|-----------|-----------|-----------|
| 68  | 1 | 0 | -0.484160 | -5.468272 | -1.380909 |
| 69  | 6 | 0 | 1.453273  | 2.086722  | -4.147884 |
| 70  | 1 | 0 | 2.295809  | 1.387856  | -4.201049 |
| 71  | 1 | 0 | 0.555576  | 1.508381  | -3.916094 |
| 72  | 1 | 0 | 1.314106  | 2.519783  | -5.145604 |
| 73  | 6 | 0 | 3.022390  | 3.913694  | -3.570901 |
| 74  | 1 | 0 | 3.259899  | 4.790791  | -2.959474 |
| 75  | 1 | 0 | 3.882475  | 3.232871  | -3.535011 |
| 76  | 1 | 0 | 2.916420  | 4.260043  | -4.605364 |
| 77  | 6 | 0 | 0.559825  | 4.206209  | -3.118453 |
| 78  | 1 | 0 | 0.742569  | 5.046789  | -2.438235 |
| 79  | 1 | 0 | 0.420523  | 4.625888  | -4.121757 |
| 80  | 1 | 0 | -0.380990 | 3.728956  | -2.823727 |
| 81  | 8 | 0 | 1.468500  | -0.832945 | -2.623176 |
| 82  | 8 | 0 | 1.332615  | -0.619710 | 0.050488  |
| 83  | 6 | 0 | 2.472075  | -1.124027 | -1.975002 |
| 84  | 6 | 0 | 2.418925  | -1.043465 | -0.451687 |
| 85  | 8 | 0 | 3.624371  | -1.490888 | -2.474257 |
| 86  | 6 | 0 | 3.735229  | -1.586870 | -3.927437 |
| 87  | 1 | 0 | 4.778624  | -1.836976 | -4.109263 |
| 88  | 1 | 0 | 3.074772  | -2.377598 | -4.288247 |
| 89  | 1 | 0 | 3.476603  | -0.629609 | -4.382030 |
| 90  | 6 | 0 | 3.699742  | -0.627882 | 0.299742  |
| 91  | 9 | 0 | 4.755767  | -1.404471 | 0.050896  |
| 92  | 9 | 0 | 3.481191  | -0.589880 | 1.618997  |
| 93  | 9 | 0 | 4.016426  | 0.627287  | -0.103666 |
| 94  | 6 | 0 | 5.338989  | -3.830365 | 3.872056  |
| 95  | 6 | 0 | 4.132604  | -3.526596 | 3.252184  |
| 96  | 6 | 0 | 3.947907  | -3.762112 | 1.869080  |
| 97  | 6 | 0 | 5.016221  | -4.341004 | 1.142081  |
| 98  | 6 | 0 | 6.215837  | -4.654853 | 1.769255  |
| 99  | 6 | 0 | 6.384356  | -4.395657 | 3.133805  |
| 100 | 1 | 0 | 5.466520  | -3.628580 | 4.931393  |
| 101 | 1 | 0 | 3.335414  | -3.084777 | 3.838856  |
| 102 | 1 | 0 | 4.895544  | -4.580089 | 0.091289  |
| 103 | 1 | 0 | 7.019251  | -5.109941 | 1.197853  |
| 104 | 1 | 0 | 7.323595  | -4.640130 | 3.621799  |
| 105 | 6 | 0 | 2.674976  | -3.440630 | 1.226506  |
| 106 | 6 | 0 | 1.459540  | -3.228288 | 2.081977  |
| 107 | 1 | 0 | 1.336459  | -4.048438 | 2.797922  |
| 108 | 1 | 0 | 1.560002  | -2.305187 | 2.668422  |
| 109 | 1 | 0 | 0.555750  | -3.150359 | 1.477360  |
| 110 | 6 | 0 | 2.549845  | -3.305046 | -0.153244 |
| 111 | 1 | 0 | 1.558672  | -3.398676 | -0.584015 |



|     |    |   |           |           |           |
|-----|----|---|-----------|-----------|-----------|
| 112 | 1  | 0 | 3.384836  | -3.523114 | -0.810199 |
| 113 | 6  | 0 | -4.102559 | 2.393255  | -2.476092 |
| 114 | 17 | 0 | -1.770377 | 1.000126  | -2.793455 |
| 115 | 17 | 0 | -5.871417 | 2.345168  | -2.060311 |
| 116 | 1  | 0 | -4.028092 | 0.279162  | -3.031500 |
| 117 | 1  | 0 | -3.623985 | 0.614127  | -1.311214 |
| 118 | 1  | 0 | -4.023267 | 2.764387  | -3.497919 |
| 119 | 1  | 0 | -3.626889 | 3.084754  | -1.780631 |
| 120 | 6  | 0 | -3.573437 | 0.980142  | -2.332945 |

---
